# Supplementary material for: Identification of Differentially Expressed Genes and Signaling Pathways in Acute Myocardial Infarction Based on Integrated Bioinformatics Analysis
Source: Cardiovasc Ther. 2019 Aug 1;2019:8490707. doi: 10.1155/2019/8490707 (PMC6739802; doi:10.1155/2019/8490707)
Supplement: Supplementary Materials — A PPI network: there were 56 nodes and 240 edges in this network, including 2 down- and 54 upregulated genes (see the supplementary document). [file 8490707.f1.zip]

Archive with 27 entries (21 files):
- DEGs, GSE775, GSE19322, and GSE97494/
- DEGs, GSE775, GSE19322, and GSE97494/GSE19322, DEGs.xlsx
- DEGs, GSE775, GSE19322, and GSE97494/GSE775, DEGs.xlsx
- DEGs, GSE775, GSE19322, and GSE97494/GSE97494, DEGs.xlsx
- DMNC and MCC/
- DMNC and MCC/DMNC.csv
- DMNC and MCC/MCC.csv
- DMNC and MCC/Thumbs.db
- DMNC and MCC/╬ñ╢≈═╝.png
- GO and KEGG/
- GO and KEGG/barplot-KEGG.tiff
- GO and KEGG/dotplot GO.tiff
- GO and KEGG/GO.xlsx
- GO and KEGG/KEGG.xlsx
- GO and KEGG/Thumbs.db
- PPI network of module/
- PPI network of module/111.xlsx
- PPI network of module/AMI module.xlsx
- PPI network of module/module-1.tif
- PPI network of module/Thumbs.db
- The heatmap of three gene expression microarrays by utilizing the RRA approach/
- The heatmap of three gene expression microarrays by utilizing the RRA approach/downSig.xlsx
- The heatmap of three gene expression microarrays by utilizing the RRA approach/logFC5.tiff
- The heatmap of three gene expression microarrays by utilizing the RRA approach/upSig.xlsx
- Whole PPI network/
- Whole PPI network/Figure 6A.tif
- Whole PPI network/string_interactions.xlsm
