# Supplementary material for: Identification of Differentially Expressed Genes and Signaling Pathways in Acute Myocardial Infarction Based on Integrated Bioinformatics Analysis
Source: Cardiovasc Ther. 2019 Aug 1;2019:8490707. doi: 10.1155/2019/8490707 (PMC6739802; doi:10.1155/2019/8490707)
Supplement: Supplementary Materials — A PPI network: there were 56 nodes and 240 edges in this network, including 2 down- and 54 upregulated genes (see the supplementary document). [file 8490707.f1.zip › DEGs, GSE775, GSE19322, and GSE97494/GSE775, DEGs.xlsx]

## Sheet: GSE775
Gene	logFC	AveExpr	t	P.Value	adj.P.Val	B
Frmd5	-1.73156	8.19097	-6.31107	0.00144165	0.00192059	-2.32508
Lpin1	-1.55387	9.21748	-5.20202	0.00340669	0.00431291	-3.33325
Phkg1	-1.49639	6.21552	-7.16882	0.000802825	0.00112188	-1.63517
Mettl20	-1.3476	6.46541	-10.0476	0.000162005	0.000275999	0.259557
Dbp	-1.26062	7.97569	-6.18874	0.00157544	0.00208642	-2.42944
Tspyl4	-1.23748	8.41239	-13.6468	3.64e-05	8.35e-05	2.02977
Sdpr	-1.22832	9.22095	-5.18737	0.00344872	0.00436232	-3.34757
Rbm38	-1.21354	10.2777	-9.56012	0.00020581	0.000337532	-0.0242692
Kcnk3	-1.21172	8.7725	-8.45779	0.000369376	0.000562596	-0.717282
Gmnn	-1.20649	7.89155	-4.30875	0.00755811	0.00916116	-4.25923
Ptp4a3	-1.20052	11.0214	-13.7779	3.48e-05	8.09e-05	2.08555
Mtif2	-1.18705	8.61117	-7.93845	0.00049835	0.000734206	-1.07171
Ift81	-1.17428	7.81647	-3.58582	0.0156317	0.0183613	-5.09325
Kcnd2	-1.16193	5.35103	-7.00818	0.000891719	0.0012323	-1.7591
Il15	-1.15841	5.84892	-10.1132	0.000156998	0.000268727	0.296792
Rgs2	-1.14264	8.27108	-3.78243	0.0127284	0.0150828	-4.85869
Gpam	-1.1374	10.4626	-7.74789	0.000558647	0.000812629	-1.20678
Fah	-1.10917	10.4609	-18.1884	8.82e-06	2.94e-05	3.71132
Cpxm2	-1.10267	8.58324	-4.62204	0.0056476	0.00694074	-3.92178
Pah	-1.08305	8.83131	-2.87607	0.0345284	0.039234	-5.98569
Npc1	-1.06764	9.36687	-7.0979	0.000840713	0.00116847	-1.6896
Irs1	-1.04489	5.29175	-9.88031	0.000175657	0.00029574	0.163596
Rgs5	-1.00762	8.54762	-10.3185	0.00014248	0.000247907	0.411902
Wnk1	-0.994464	8.88724	-2.62411	0.0466167	0.0523502	-6.31717
Cpox	-0.989661	7.78103	-5.79223	0.00212151	0.00275737	-2.77892
Ube2t	-0.989356	5.51545	-10.0204	0.000164136	0.000278763	0.244051
Coq9	-0.959869	11.2258	-7.84252	0.000527684	0.000772605	-1.13935
Ptgds	-0.93996	12.1802	-5.40787	0.00287529	0.0036753	-3.13505
Tcea3	-0.938506	9.25786	-6.2206	0.00153924	0.0020425	-2.40211
Art1	-0.925003	10.236	-4.26149	0.00790713	0.00955768	-4.31137
Entpd5	-0.909736	8.74837	-4.35693	0.00722048	0.00877626	-4.20641
Pptc7	-0.90914	10.2941	-6.37367	0.00137839	0.00184081	-2.27228
Acss1	-0.905586	10.7768	-4.38816	0.007011	0.00853351	-4.17236
Ank	-0.900198	9.8288	-8.96467	0.000280017	0.000439754	-0.389225
Car8	-0.887785	6.47376	-17.9436	9.43e-06	3.07e-05	3.63181
Ces1d	-0.878775	9.27572	-5.15951	0.0035303	0.00445906	-3.37486
Iigp1	-0.855109	8.66184	-4.30641	0.00757499	0.0091778	-4.26181
Pltp	-0.844125	9.21761	-7.258	0.000758008	0.00106658	-1.56735
Mfhas1	-0.834158	8.70588	-5.67279	0.00232775	0.00301198	-2.8877
Tspan13	-0.83202	8.03604	-10.8465	0.000111896	0.000202056	0.698588
Mterfd3	-0.829261	5.87396	-9.76775	0.000185616	0.000309822	0.0981899
Cdkn1c	-0.828134	8.14089	-4.02692	0.00994047	0.011897	-4.57508
Pde7a	-0.819054	6.97596	-7.27228	0.00075111	0.00105858	-1.55656
Cacnb2	-0.812732	9.11662	-12.508	5.59e-05	0.000115968	1.52278
Rsrp1	-0.79385	10.1046	-2.13791	0.0852446	0.093588	-6.96818
Corin	-0.792646	9.56571	-4.62284	0.00564349	0.00693667	-3.92094
Rxrg	-0.788318	8.21729	-5.04452	0.0038918	0.00488249	-3.4886
Smim11	-0.782616	8.55689	-10.6728	0.000121002	0.000215735	0.605756
Dsc2	-0.782278	6.52229	-4.76809	0.00495261	0.00614104	-3.76925
Dnajb2	-0.769842	8.79786	-2.0172	0.0994181	0.108712	-7.12987
Rtn1	-0.765635	6.91256	-18.187	8.82e-06	2.94e-05	3.71088
Creg1	-0.753036	8.41367	-12.7924	5.01e-05	0.000106722	1.65337
Slc4a3	-0.751694	11.2931	-7.51298	0.000645302	0.000922554	-1.37722
Tom1l1	-0.748218	6.70823	-4.91217	0.00436266	0.00544118	-3.62168
Nfib	-0.744025	8.93978	-4.44497	0.00664762	0.00811496	-4.11076
Ablim1	-0.735496	8.93544	-3.88733	0.0114347	0.0136033	-4.7359
Ivd	-0.731896	9.48958	-10.7119	0.000118879	0.000212557	0.626758
Bnip3	-0.729478	10.2576	-2.42345	0.0595912	0.0663153	-6.58483
Ldb3	-0.71856	11.8328	-4.81101	0.00476764	0.00592513	-3.72499
Flcn	-0.717309	8.93387	-6.87944	0.000971452	0.00133258	-1.86011
Rbl2	-0.707685	6.29735	-5.97957	0.00183965	0.00241112	-2.61162
Zbtb20	-0.707029	9.07889	-2.96083	0.0312792	0.0356486	-5.87565
Epb4.1	-0.70592	8.77651	-5.38223	0.00293588	0.0037489	-3.15944
Trp53inp2	-0.694722	11.006	-3.54603	0.0163073	0.0191292	-5.14142
Ppargc1a	-0.689026	6.90308	-2.85932	0.0352136	0.0399761	-6.00751
Hand2	-0.687076	8.03923	-11.4294	8.68e-05	0.000164071	1.00042
Inmt	-0.685199	7.57447	-7.49038	0.00065445	0.000934533	-1.39385
Pgap2	-0.684965	8.02609	-5.91754	0.00192781	0.0025206	-2.66657
Amy1	-0.684887	6.2477	-2.51149	0.0534688	0.0597075	-6.46709
Sgca	-0.673674	10.4783	-4.9616	0.00417943	0.00522459	-3.5717
Herpud1	-0.671534	10.495	-3.98974	0.0103153	0.0123287	-4.61763
Cdo1	-0.671196	7.10677	-1.291	0.252878	0.267447	-8.05381
Tmem246	-0.653772	8.95076	-6.14378	0.00162824	0.00215178	-2.46819
Angpt1	-0.651877	6.00745	-12.5909	5.41e-05	0.000113301	1.56115
Tef	-0.647142	10.3677	-10.814	0.000113535	0.000204593	0.681334
Inadl	-0.645618	5.58947	-24.4755	2.01e-06	1.07e-05	5.4526
Sspn	-0.644116	10.2062	-3.38598	0.0193822	0.0225515	-5.33751
Gtf2i	-0.631041	9.4105	-5.43288	0.00281758	0.00360469	-3.11133
Pfkfb2	-0.626278	6.47646	-8.13714	0.000443518	0.000661004	-0.933804
Mrpl34	-0.625395	9.43913	-3.27452	0.0219124	0.0253167	-5.47623
Eef1a2	-0.624121	13.0073	-6.17072	0.00159636	0.00211284	-2.44495
Immp1l	-0.621362	9.7823	-3.54858	0.0162631	0.0190798	-5.13832
Atg13	-0.621151	8.93617	-3.11594	0.0261809	0.0300793	-5.67656
Ephx1	-0.617518	9.25869	-3.91755	0.0110905	0.0132136	-4.70084
Dguok	-0.613176	8.88849	-7.88297	0.000515071	0.000756038	-1.11074
Gab1	-0.612835	8.25972	-7.55051	0.00063044	0.00090382	-1.34968
Ndufb11	-0.591659	11.7658	-4.38094	0.00705875	0.00858805	-4.18021
Meox2	-0.590427	7.43257	-2.56241	0.0502433	0.056235	-6.3992
Cidea	-0.585931	8.61813	-6.44292	0.00131218	0.00175964	-2.21434
Asrgl1	-0.585394	6.23067	-14.9481	2.33e-05	5.97e-05	2.56161
Clec3b	-0.58449	7.99842	-3.1047	0.0265173	0.0304599	-5.69089
Gm16793	-0.582469	6.10233	-4.60749	0.00572285	0.0070273	-3.93714
Ak1	-0.582317	11.4601	-4.39733	0.00695081	0.0084638	-4.16238
Pcsk6	-0.580012	8.41178	-3.96432	0.010581	0.0126358	-4.64685
Lyrm2	-0.573204	6.86424	-27.3072	1.16e-06	7.55e-06	6.09236
2310061I04Rik	-0.566261	10.6088	-3.05697	0.0280008	0.0320669	-5.7519
BC004004	-0.565339	11.5113	-3.40324	0.0190209	0.0221518	-5.31619
Ppara	-0.56394	9.13087	-5.24366	0.00329053	0.00417309	-3.29273
Smarca2	-0.563218	7.76575	-2.66649	0.0442925	0.0498747	-6.261
Fam46c	-0.559422	7.18385	-0.773263	0.474138	0.490704	-8.57791
Setd8	-0.557405	10.2155	-2.71541	0.0417667	0.0471156	-6.19636
Adcy6	-0.54759	10.0218	-6.12861	0.00164653	0.00217431	-2.48132
Nudt3	-0.544666	10.3985	-7.77151	0.000550723	0.000802304	-1.18988
Sirt3	-0.538586	8.00442	-3.7321	0.0134082	0.0158347	-4.91819
Akap9	-0.535819	7.02308	-3.36288	0.0198781	0.0230916	-5.36611
Agtrap	-0.53522	7.8917	-16.7547	1.32e-05	3.92e-05	3.22973
Vldlr	-0.532838	7.74635	-5.7686	0.00216056	0.00280519	-2.80031
Epas1	-0.532277	8.04239	-2.77349	0.0389719	0.0440596	-6.11989
Yipf4	-0.529967	9.88616	-15.8156	1.76e-05	4.82e-05	2.89175
Ascc1	-0.527569	8.10519	-12.5878	5.42e-05	0.000113385	1.55972
Thbs2	-0.516803	8.01597	-2.51499	0.05324	0.0594595	-6.46241
Cdh2	-0.512888	10.7601	-4.69571	0.0052838	0.00652485	-3.84447
Pxmp2	-0.511343	11.1492	-7.42183	0.000683151	0.000970314	-1.44455
B3galnt2	-0.51111	6.75336	-6.65782	0.00112935	0.00153258	-2.03764
Bpgm	-0.508024	7.99991	-1.00299	0.361669	0.378022	-8.36691
Nr1d2	-0.504833	9.36845	-3.46888	0.0177144	0.0206743	-5.23548
P2ry1	-0.501382	6.862	-5.81084	0.00209134	0.00272018	-2.76212
Etfdh	-0.500828	11.0596	-2.89613	0.0337266	0.0383628	-5.95957
Mlf1	-0.497711	9.46069	-1.46745	0.201868	0.215586	-7.84234
Rpa3	-0.497515	7.0821	-5.49647	0.00267686	0.00343421	-3.05137
Mettl5	-0.497013	7.02332	-3.60516	0.0153148	0.0179988	-5.06992
Ivns1abp	-0.490251	11.1254	-2.68613	0.0432588	0.0487485	-6.23503
Retsat	-0.488148	8.41505	-3.52914	0.0166042	0.0194514	-5.16194
Maf1	-0.486192	10.0832	-11.1563	9.76e-05	0.000180293	0.860866
AI464131	-0.482426	7.72372	-3.82959	0.0121271	0.0144055	-4.80329
Smpdl3a	-0.481495	9.35712	-3.23515	0.0228939	0.0264228	-5.52566
Mgea5	-0.479236	9.76868	-3.33861	0.0204148	0.0236867	-5.39625
Rmnd5a	-0.477281	10.1437	-4.2091	0.008316	0.0100269	-4.36956
Gdap10	-0.476362	8.61404	-3.18489	0.0242195	0.0278938	-5.58905
Fhod3	-0.47131	9.78182	-1.9942	0.102388	0.111791	-7.16058
Mmp15	-0.47126	7.21167	-1.7429	0.141496	0.152716	-7.49244
Crebrf	-0.464223	6.65838	-5.99987	0.00181185	0.00237681	-2.59373
Abcc9	-0.463994	10.5351	-3.33848	0.0204178	0.0236871	-5.39642
Josd2	-0.460089	9.99469	-7.69838	0.000575702	0.000834657	-1.24233
Bzw2	-0.449812	10.824	-3.39372	0.0192192	0.0223707	-5.32794
Mrpl39	-0.448255	9.27698	-3.88899	0.0114155	0.0135823	-4.73398
Mrpl18	-0.442897	10.8401	-3.19044	0.0240689	0.0277313	-5.58203
Mfsd7c	-0.441318	5.63149	-16.2368	1.55e-05	4.39e-05	3.04573
Fhl2	-0.437267	12.3456	-1.92714	0.111587	0.121441	-7.24988
Gbp7	-0.437023	8.80841	-1.68045	0.153385	0.165079	-7.57338
Mut	-0.434574	10.1086	-5.78331	0.00213615	0.00277557	-2.78698
Myh11	-0.434168	7.82283	-2.26179	0.0728999	0.0804801	-6.80179
Car14	-0.429929	10.5056	-1.29787	0.250685	0.265218	-8.04581
Cxcl12	-0.427948	8.6403	-3.51811	0.0168014	0.0196612	-5.17536
Slco5a1	-0.425854	7.79079	-8.54975	0.000350894	0.000537443	-0.656501
Nr1h3	-0.425295	8.26632	-5.29345	0.00315761	0.0040145	-3.24456
Usp2	-0.423408	9.80829	-6.85084	0.000990289	0.00135565	-1.88276
Ogn	-0.423336	9.20576	-1.10306	0.319982	0.335936	-8.26345
Lonp2	-0.418625	9.31552	-3.24726	0.0225868	0.0260821	-5.51043
Akap1	-0.417664	9.23141	-4.705	0.00523988	0.00647886	-3.83478
1110054M08Rik	-0.416882	7.80687	-19.7525	5.85e-06	2.22e-05	4.19549
Slc25a39	-0.416582	10.2729	-3.48039	0.0174961	0.0204441	-5.2214
Cacna1c	-0.413929	10.0581	-2.72291	0.0413938	0.0467251	-6.18647
Coq10a	-0.410515	11.1932	-4.35982	0.00720077	0.00875475	-4.20325
Rorc	-0.409751	7.69921	-2.83129	0.0363951	0.0412639	-6.04414
Ube2b	-0.402904	10.601	-2.41513	0.0602075	0.066967	-6.59597
Ramp2	-0.398266	9.492	-7.33772	0.000720431	0.00102003	-1.50732
Selenbp1	-0.395076	9.71653	-3.78484	0.0126969	0.0150475	-4.85585
Iars2	-0.39448	9.72176	-17.4143	1.09e-05	3.43e-05	3.45618
Coq7	-0.394382	9.55892	-3.22634	0.0231202	0.0266699	-5.53674
Adssl1	-0.3929	10.188	-2.62967	0.046304	0.0520257	-6.30979
Gas6	-0.389198	9.38768	-2.59968	0.0480171	0.0538675	-6.34961
Actr6	-0.389126	7.64582	-2.26567	0.0725447	0.0801081	-6.79656
Lamb2	-0.384445	9.6776	-3.69098	0.0139944	0.0165003	-4.96708
Six4	-0.383947	5.70013	-9.9579	0.00016916	0.000286513	0.208293
Idua	-0.382495	7.41186	-6.91569	0.000948179	0.00130352	-1.83152
Tango2	-0.381307	10.6805	-2.71611	0.0417314	0.0470818	-6.19543
Pnkd	-0.378162	9.46376	-7.90924	0.000507072	0.000745423	-1.09223
Tbc1d24	-0.375149	7.39746	-2.36779	0.0638511	0.0708934	-6.65944
Sesn1	-0.374517	10.6416	-1.20084	0.283319	0.298342	-8.15667
Rhbdl3	-0.373768	7.48879	-24.2261	2.12e-06	1.11e-05	5.39265
Klhl24	-0.372531	8.4142	-2.87286	0.0346585	0.0393767	-5.98987
Pafah1b1	-0.370904	10.0246	-6.39423	0.00135834	0.00181763	-2.25503
Kcnh2	-0.362535	9.08379	-2.7774	0.0387915	0.0438727	-6.11476
Gpc1	-0.361389	11.1039	-4.86882	0.00453111	0.00564242	-3.66578
Tmem150a	-0.360719	8.17897	-2.32331	0.0674921	0.0747555	-6.71915
Dbt	-0.358939	8.35531	-3.73244	0.0134035	0.0158313	-4.91779
Stat1	-0.35649	6.50906	-2.45047	0.057635	0.064212	-6.54865
Acot13	-0.355743	11.1078	-3.22402	0.0231803	0.0267321	-5.53967
Kif1c	-0.354674	9.35843	-5.50521	0.00265817	0.00341323	-3.04317
Mrpl11	-0.354499	8.91228	-2.38395	0.0625816	0.0695369	-6.63777
Atp1a2	-0.351022	8.50772	-1.39953	0.220235	0.234427	-7.92517
Crip2	-0.350779	11.3776	-10.9856	0.000105186	0.000192243	0.771978
Per3	-0.348897	8.28994	-4.69721	0.00527666	0.00651972	-3.8429
Gstk1	-0.345972	9.8275	-3.51881	0.0167889	0.0196492	-5.17451
Trappc12	-0.345787	7.88382	-2.21023	0.0777895	0.0857156	-6.87106
Ogdh	-0.343039	12.8749	-14.6099	2.61e-05	6.51e-05	2.42786
Pam	-0.341462	7.52572	-2.76166	0.0395241	0.0446665	-6.13544
Atp11a	-0.340961	8.87462	-1.62509	0.164755	0.177011	-7.64444
Pdrg1	-0.340882	9.45526	-6.37138	0.00138065	0.00184354	-2.27421
Kpna2	-0.340034	8.72774	-1.69784	0.149976	0.161589	-7.55091
Atp5o	-0.339987	12.8253	-4.89172	0.00444119	0.00553518	-3.64245
Ptcd2	-0.339396	9.7739	-6.41115	0.00134208	0.00179643	-2.24086
Agl	-0.339147	8.46475	-1.97605	0.104796	0.114321	-7.18478
Mrps2	-0.337872	8.16947	-5.94043	0.00189471	0.00247919	-2.64624
Nit1	-0.337607	7.68492	-12.2837	6.1e-05	0.000124685	1.41775
Sgcb	-0.336767	8.44807	-2.27076	0.0720826	0.079628	-6.78972
Myom2	-0.334261	10.9256	-5.50212	0.00266477	0.00342121	-3.04607
Prox1	-0.332238	6.72943	-21.5343	3.81e-06	1.65e-05	4.70231
Gbp2	-0.326317	8.55515	-1.93896	0.109904	0.119654	-7.23417
Clip1	-0.325983	10.2796	-2.71913	0.0415812	0.0469245	-6.19145
Dynll2	-0.325131	9.63122	-2.12949	0.0861603	0.0945814	-6.97948
Larp4b	-0.322208	8.83265	-1.8309	0.126305	0.136861	-7.37719
Kcnj11	-0.319737	9.49706	-2.17585	0.0812433	0.0894086	-6.91724
Gnmt	-0.316647	7.25337	-18.9083	7.27e-06	2.56e-05	3.93914
Pfkfb1	-0.314394	7.68587	-3.22228	0.0232254	0.0267771	-5.54186
Fastk	-0.31377	11.042	-3.91874	0.0110772	0.0131995	-4.69946
Zfp943	-0.312975	6.78249	-3.06151	0.0278555	0.0319131	-5.74608
Hsbp1	-0.31069	9.96209	-4.91637	0.00434672	0.00542285	-3.61742
Tmed4	-0.309579	9.87596	-3.15982	0.0249128	0.028662	-5.62079
AU020206	-0.309095	8.58196	-9.12141	0.000257766	0.000409162	-0.291105
Mrpl23	-0.308611	10.308	-2.62694	0.0464573	0.0521846	-6.31341
Il10rb	-0.30824	10.7142	-2.33971	0.066124	0.0733145	-6.69713
Fmo1	-0.307649	9.22171	-7.0777	0.000851891	0.0011825	-1.70518
Abcb10	-0.306838	7.63342	-7.17841	0.00079786	0.00111583	-1.62785
Lclat1	-0.306369	10.1779	-1.7213	0.1455	0.156902	-7.52052
D030056L22Rik	-0.305711	7.81133	-3.93701	0.0108751	0.0129729	-4.67833
Hrc	-0.304159	11.3667	-4.2298	0.00815163	0.00983554	-4.34653
Deb1	-0.299467	9.31264	-1.21469	0.278438	0.293415	-8.14113
Phtf2	-0.297076	9.01634	-2.91168	0.0331195	0.037687	-5.93935
Pdcd4	-0.294672	7.98574	-2.32702	0.06718	0.0744286	-6.71417
Mcee	-0.29299	9.31565	-2.41038	0.0605629	0.0673538	-6.60234
Bri3	-0.292785	11.9952	-3.043	0.0284521	0.0325497	-5.76981
Ptprb	-0.291705	8.15514	-3.75388	0.0131091	0.0155003	-4.8924
Txndc16	-0.29131	7.60351	-2.5938	0.0483608	0.0542251	-6.35742
Stk39	-0.284482	8.36521	-1.03524	0.347765	0.364055	-8.33426
Kif16b	-0.284059	7.59776	-1.44936	0.206611	0.220544	-7.86456
Pde6d	-0.283609	8.58007	-4.02067	0.0100023	0.0119628	-4.58221
Phldb1	-0.282917	8.59579	-9.49566	0.000212604	0.000347435	-0.062776
Kank3	-0.281442	8.8611	-1.94859	0.108555	0.118244	-7.22137
Myh14	-0.281418	10.2733	-1.98073	0.10417	0.113652	-7.17855
Tmem230	-0.280305	9.52791	-1.57445	0.175884	0.188666	-7.70877
Mapt	-0.279216	9.45296	-3.97134	0.0105068	0.0125507	-4.63876
Pygb	-0.277026	10.7229	-2.39519	0.0617142	0.0685905	-6.6227
Aamdc	-0.27395	8.62888	-2.92598	0.032572	0.0370784	-5.92079
Wdr45	-0.27287	8.38246	-1.17579	0.292341	0.307657	-8.18453
Ilkap	-0.272631	9.49215	-5.99276	0.00182152	0.00238842	-2.59998
Nampt	-0.271813	10.1218	-1.24061	0.269506	0.284414	-8.11179
Dlg1	-0.270519	9.55296	-4.6976	0.0052748	0.00651834	-3.84249
Cul4a	-0.270078	9.17554	-1.59728	0.170778	0.183324	-7.67985
Gstz1	-0.268978	9.33005	-3.20066	0.0237944	0.0274222	-5.56912
2019-03-02	-0.266272	8.78691	-2.28672	0.0706538	0.0781386	-6.76828
Ttc30b	-0.264491	8.90479	-2.55383	0.0507715	0.0567825	-6.41062
Kdr	-0.262745	8.87106	-2.69118	0.0429972	0.0484599	-6.22835
Rragd	-0.261358	8.25194	-3.82684	0.0121613	0.0144421	-4.80651
Isca1	-0.260005	10.5737	-1.34754	0.23535	0.249725	-7.98741
Ntn1	-0.258589	8.49356	-3.47931	0.0175164	0.0204623	-5.22272
Dpm1	-0.255884	9.32071	-1.25485	0.26471	0.279487	-8.09552
Bckdhb	-0.254878	9.7459	-1.79961	0.131506	0.14225	-7.41831
Spr	-0.25231	8.93314	-2.34271	0.0658768	0.0730497	-6.69309
Bmi1	-0.251779	10.3199	-1.39748	0.220812	0.234984	-7.92764
Ms4a4d	-0.246944	6.81729	-4.28239	0.00775056	0.00937751	-4.28828
Ak3	-0.246632	8.29339	-2.1137	0.0879063	0.0964255	-7.00066
Slc12a7	-0.246481	10.3978	-1.96382	0.106453	0.11607	-7.20108
Fam73b	-0.246205	7.94761	-2.97413	0.0308013	0.035136	-5.85847
Ube2a	-0.24572	7.75439	-2.35334	0.0650104	0.0721256	-6.67884
Nnt	-0.245661	12.2309	-2.88102	0.0343285	0.0390271	-5.97923
Mrpl21	-0.245116	9.11261	-2.51133	0.0534793	0.0597115	-6.4673
Rai2	-0.245036	7.7349	-3.72012	0.0135761	0.0160308	-4.93241
Dap3	-0.243612	9.27652	-3.06826	0.0276416	0.0316888	-5.73744
Thrsp	-0.243509	8.97884	-1.75694	0.138953	0.150064	-7.47413
Acot1	-0.243408	8.84761	-0.680412	0.526311	0.542515	-8.65109
Vamp5	-0.242534	9.65987	-1.91078	0.113958	0.123929	-7.2716
Slco3a1	-0.242311	9.38116	-6.08702	0.00169792	0.00223811	-2.51744
Fem1a	-0.239949	9.66632	-2.31862	0.0678886	0.0751851	-6.72544
Atg2a	-0.239208	8.82997	-10.7206	0.00011841	0.000211761	0.631452
Aifm1	-0.237958	10.8846	-1.66972	0.155525	0.167321	-7.5872
Limch1	-0.237156	9.73874	-1.34493	0.236134	0.250527	-7.9905
Mien1	-0.237117	8.95266	-2.99099	0.0302067	0.0344802	-5.83671
Pcyox1	-0.236355	9.52031	-2.11539	0.0877173	0.0962302	-6.99839
Sgcg	-0.235805	10.3016	-1.20951	0.280253	0.29522	-8.14695
Snx21	-0.235625	8.49996	-8.29301	0.000405466	0.000610645	-0.827643
Ezh1	-0.232767	8.37296	-3.06011	0.0279003	0.0319602	-5.74788
Ubr7	-0.231698	8.8351	-3.3882	0.0193353	0.0225029	-5.33477
Fars2	-0.229897	9.45004	-3.12098	0.0260315	0.0299176	-5.67014
Oxnad1	-0.229236	5.73263	-8.03907	0.000469636	0.00069601	-1.0015
Hsd17b4	-0.228914	9.89043	-2.98078	0.0305652	0.0348758	-5.84989
Pnpla2	-0.227821	12.1224	-3.654	0.0145469	0.0171193	-5.01127
Ndufa6	-0.224679	10.7519	-2.83986	0.0360292	0.0408543	-6.03293
Tbl1xr1	-0.222125	8.68112	-3.03726	0.0286401	0.0327519	-5.77717
Idh2	-0.220526	12.4936	-4.42274	0.00678716	0.0082749	-4.13481
Nrbp2	-0.219402	8.08236	-4.16234	0.00870167	0.0104616	-4.42184
Islr	-0.218254	8.4723	-1.0944	0.32342	0.339383	-8.27265
Ndufb3	-0.217107	11.3205	-2.48662	0.0551257	0.0615026	-6.5003
Uqcrc1	-0.216967	12.5994	-1.50941	0.191262	0.204634	-7.79037
H2afv	-0.214495	9.04734	-1.81002	0.129752	0.140441	-7.40465
Eci1	-0.212532	11.8703	-3.35983	0.0199447	0.0231659	-5.3699
AW112010	-0.211697	7.43495	-2.56571	0.0500417	0.056038	-6.3948
Ptprs	-0.211574	8.03317	-2.10745	0.0886075	0.0971702	-7.00904
Nfix	-0.2109	9.01324	-1.33766	0.238329	0.252825	-7.99911
Psmb9	-0.210433	8.25403	-4.33431	0.00737681	0.00895755	-4.23117
Runx1t1	-0.209776	6.14495	-4.35712	0.00721919	0.00877592	-4.2062
Bcat2	-0.209466	8.57628	-0.883836	0.417043	0.434083	-8.48133
Zfpm2	-0.208933	7.53836	-5.75879	0.00217701	0.00282487	-2.8092
Gzma	-0.206356	6.1656	-2.95459	0.0315064	0.0358981	-5.88373
Gys1	-0.205454	10.6351	-1.77671	0.135452	0.146428	-7.44831
Akap8l	-0.204314	8.63797	-2.87873	0.0344207	0.0391167	-5.98222
Myzap	-0.203235	10.87	-1.08998	0.32519	0.341118	-8.27733
Aox1	-0.202938	8.77052	-1.39417	0.22175	0.235897	-7.93164
Ndufab1	-0.202673	12.6561	-3.80859	0.0123908	0.0147047	-4.82792
Ndufa8	-0.201612	11.1168	-1.73024	0.143829	0.155158	-7.50891
Dmpk	-0.201523	11.0864	-2.13961	0.0850605	0.0933976	-6.96589
Cnot6l	-0.199792	6.08836	-3.30639	0.0211528	0.0244876	-5.43639
Egln1	-0.198477	11.7884	-2.5728	0.0496112	0.0555844	-6.38536
Gna12	-0.197537	9.3636	-1.05591	0.339087	0.355141	-8.31298
Prkdc	-0.196605	7.00142	-5.5425	0.00258012	0.00331888	-3.00828
Tmem66	-0.196028	11.2893	-1.67461	0.154546	0.166308	-7.5809
Ndufa13	-0.195947	11.0807	-2.5496	0.0510339	0.0570541	-6.41625
Chchd7	-0.195761	10.2749	-1.42443	0.213323	0.227291	-7.89499
Ctnnal1	-0.195507	6.37884	-1.26522	0.261264	0.275915	-8.08362
0610012G03Rik	-0.193792	10.343	-2.30193	0.069321	0.0767131	-6.74786
Pgam2	-0.192689	12.0025	-1.57185	0.176476	0.189255	-7.71206
Zkscan3	-0.188578	9.21286	-1.96108	0.106828	0.116465	-7.20474
Pkia	-0.188291	8.47834	-1.04722	0.342714	0.358853	-8.32196
St3gal3	-0.185986	7.36602	-2.01556	0.0996264	0.108926	-7.13206
Gm561	-0.185865	6.94418	-2.82699	0.0365799	0.0414572	-6.04975
Ubac1	-0.185045	8.34165	-1.97382	0.105097	0.114634	-7.18776
Lpgat1	-0.184701	7.84479	-2.17411	0.0814215	0.0895934	-6.91957
Atg5	-0.183553	7.45678	-1.47264	0.200524	0.214203	-7.83593
Tcf15	-0.181449	8.10118	-3.34818	0.0202013	0.0234483	-5.38436
Mrpl51	-0.180996	10.7637	-1.26724	0.260598	0.275279	-8.08129
Ypel3	-0.180985	10.0437	-1.66823	0.155825	0.167623	-7.58912
Abcb1a	-0.18005	7.27692	-1.89512	0.116277	0.126325	-7.29237
Xpo7	-0.179489	8.36162	-1.39242	0.222246	0.236395	-7.93374
Rab4a	-0.177317	8.15642	-3.33368	0.0205259	0.0237935	-5.40239
Jtb	-0.177257	10.6668	-2.71775	0.0416496	0.0469957	-6.19326
Fam114a2	-0.176505	7.64547	-2.24847	0.0741304	0.0817971	-6.81968
Use1	-0.173283	9.54276	-1.85644	0.122215	0.132577	-7.34352
Tek	-0.172922	8.09987	-2.2798	0.0712703	0.0787805	-6.77759
Cd59a	-0.172645	10.7927	-1.90221	0.115221	0.125224	-7.28296
Slc2a4	-0.17254	8.30415	-1.38353	0.224787	0.238953	-7.94444
Rab12	-0.171721	10.5584	-1.29753	0.250796	0.265278	-8.04622
Nlk	-0.171578	6.12672	-1.72348	0.14509	0.156479	-7.51769
Prkab1	-0.170771	9.10642	-2.5748	0.0494908	0.0554566	-6.3827
Coq3	-0.169563	8.89882	-2.25991	0.0730723	0.0806602	-6.80431
Golga4	-0.168682	10.4193	-0.84507	0.436432	0.453077	-8.5163
Sdhaf1	-0.168451	9.57873	-3.28206	0.02173	0.0251193	-5.4668
Nkx2-5	-0.166313	10.2133	-1.38529	0.22428	0.238471	-7.94231
Pcyt2	-0.165863	9.00225	-1.67015	0.15544	0.167249	-7.58665
Kcnk2	-0.165787	6.18999	-3.07973	0.0272819	0.0313052	-5.72276
Hint2	-0.165414	10.5617	-2.04869	0.0954966	0.104528	-7.08776
Timm23	-0.164324	11.547	-1.61032	0.167928	0.180309	-7.66327
Cstf2t	-0.163819	8.1154	-0.903714	0.407364	0.424311	-8.46295
Pradc1	-0.163483	6.28172	-1.56362	0.178358	0.191249	-7.72244
Pter	-0.16327	7.97594	-7.00594	0.00089304	0.00123354	-1.76084
Phpt1	-0.163255	10.3589	-3.88099	0.0115085	0.0136874	-4.74328
Fam98a	-0.162183	9.40255	-1.1376	0.306582	0.322256	-8.22634
Exosc7	-0.161647	8.67991	-2.79285	0.0380871	0.0430872	-6.09448
Ankrd40	-0.16144	8.67247	-1.63368	0.162937	0.175122	-7.63345
Mrpl44	-0.16109	8.28647	-0.862722	0.42752	0.444193	-8.50052
Foxo3	-0.160848	9.34936	-1.24598	0.267689	0.282564	-8.10567
Ttc33	-0.160781	8.11195	-1.49347	0.195226	0.208799	-7.81018
Palm	-0.158192	9.02719	-3.28703	0.0216105	0.0249944	-5.46058
2410015M20Rik	-0.155394	9.56637	-1.64855	0.159838	0.171855	-7.61441
Mina	-0.154679	6.52217	-1.63735	0.162166	0.174315	-7.62875
Eef1d	-0.15446	10.1127	-1.26007	0.262969	0.277682	-8.08953
Fap	-0.152541	5.57054	-1.4485	0.206839	0.220705	-7.86561
Myl7	-0.151999	7.16738	-0.232048	0.825651	0.834051	-8.88442
Hmgb3	-0.151928	10.6143	-0.842199	0.437895	0.454487	-8.51884
Crip1	-0.151474	10.0846	-0.827289	0.445552	0.46216	-8.53194
Lamtor3	-0.150835	9.50629	-1.37343	0.227704	0.241876	-7.95654
2019-03-06	-0.149957	10.5458	-1.31383	0.245661	0.260129	-8.02716
Phospho2	-0.149109	7.67844	-3.53757	0.0164554	0.0192873	-5.1517
Cox7a1	-0.148916	11.7929	-1.64653	0.160256	0.172283	-7.617
Pcm1	-0.148645	6.84435	-2.96681	0.0310633	0.035421	-5.86793
Ipo8	-0.147642	8.24531	-1.10879	0.317727	0.33369	-8.25735
Slc9a3r2	-0.147563	8.84188	-9.03944	0.000269129	0.000424431	-0.342229
Kcnj2	-0.147077	5.82068	-3.54128	0.0163903	0.0192162	-5.14719
Polr2e	-0.14577	8.73856	-1.02247	0.353215	0.369495	-8.34727
Itm2b	-0.14396	11.1314	-0.917403	0.400802	0.417725	-8.45013
Ppp3cc	-0.143946	7.66642	-2.10568	0.0888065	0.0973763	-7.01141
Agpat1	-0.143923	9.24787	-1.23996	0.269725	0.28461	-8.11252
Vtn	-0.143746	7.99768	-3.05511	0.0280603	0.0321225	-5.75428
Pkdcc	-0.142957	8.80398	-1.03447	0.348091	0.364353	-8.33505
Fh1	-0.140939	11.9405	-1.92524	0.11186	0.121707	-7.25241
Wdsub1	-0.14055	5.9777	-3.01353	0.0294319	0.0336178	-5.80768
Alad	-0.139031	10.3018	-1.79844	0.131704	0.142447	-7.41984
Lsm14b	-0.137788	9.72928	-0.703436	0.513018	0.529063	-8.63365
Zmynd11	-0.136695	10.6082	-1.31013	0.246818	0.261291	-8.0315
Ciao1	-0.135892	8.85564	-2.00256	0.101298	0.110684	-7.14943
Scn7a	-0.134774	6.61064	-2.28255	0.0710244	0.0785286	-6.77389
Tfb2m	-0.134516	9.03554	-0.872383	0.422701	0.4395	-8.49178
Amacr	-0.133377	8.49807	-1.48525	0.197301	0.210914	-7.82036
Asf1a	-0.13193	7.01716	-3.05175	0.0281684	0.032242	-5.75859
Uros	-0.131621	8.51699	-7.20844	0.000782537	0.00109809	-1.60496
Slc5a6	-0.130798	8.40769	-1.47043	0.201097	0.214789	-7.83867
Atp6v1c1	-0.130715	8.68433	-0.559913	0.599569	0.61508	-8.73425
Pcbd2	-0.128729	9.29669	-1.64866	0.159816	0.171852	-7.61427
Timm44	-0.128539	9.58165	-1.28889	0.253556	0.268131	-8.05626
Ryr2	-0.128407	11.471	-1.47452	0.200041	0.213713	-7.83362
Stard7	-0.126542	9.30828	-1.95024	0.108325	0.118008	-7.21917
Sdhaf2	-0.126268	7.83715	-1.12489	0.311457	0.327222	-8.24008
Wnk2	-0.125685	8.5798	-1.442	0.20857	0.222417	-7.87356
Nr2f6	-0.12555	9.1251	-1.73332	0.143258	0.154561	-7.50491
Dhrs7	-0.125147	8.36993	-1.71796	0.146129	0.157542	-7.52486
Lmo7	-0.124565	12.2217	-1.35892	0.23196	0.246278	-7.97387
Fdft1	-0.124502	9.17983	-0.774381	0.473533	0.490136	-8.57698
Gsn	-0.124405	12.2663	-0.796085	0.461902	0.478778	-8.55879
Tenc1	-0.124236	9.20767	-1.73847	0.142308	0.153574	-7.4982
Cradd	-0.124133	7.55088	-6.52485	0.00123863	0.00166767	-2.14643
Mrpl55	-0.124078	7.60768	-2.73922	0.040595	0.0458412	-6.16497
Pitpnc1	-0.123451	8.39028	-2.55335	0.0508014	0.0568013	-6.41126
Dpt	-0.123385	8.71654	-0.320981	0.76114	0.771559	-8.85539
Nacc2	-0.123243	7.0549	-1.40419	0.218925	0.233118	-7.91954
Thra	-0.123039	8.83094	-5.03243	0.00393226	0.00492971	-3.50066
Grcc10	-0.122175	11.4098	-2.16216	0.0826628	0.0908677	-6.93561
Paip2b	-0.122157	8.66532	-1.19429	0.285653	0.300727	-8.16398
Slc16a7	-0.121222	5.25546	-1.8344	0.125735	0.136278	-7.37257
Abcb7	-0.121213	7.34529	-1.4492	0.206655	0.220563	-7.86476
Pcp4l1	-0.121117	9.55168	-0.842416	0.437785	0.454426	-8.51865
Zmynd8	-0.120574	5.77901	-7.78693	0.00054562	0.000795799	-1.17888
Lias	-0.120417	9.25411	-1.07765	0.330161	0.346124	-8.29031
Angptl2	-0.120023	10.2494	-0.949771	0.385619	0.402429	-8.41926
Dlst	-0.119657	10.9805	-0.854781	0.431512	0.448181	-8.50765
Mitf	-0.117119	7.36255	-2.25763	0.0732817	0.080881	-6.80737
Oxct1	-0.116872	11.1057	-0.813618	0.452662	0.469423	-8.5438
Cmc2	-0.116689	9.26222	-1.81982	0.128121	0.138761	-7.39176
Cmtm8	-0.116337	7.88344	-2.79697	0.0379017	0.0428941	-6.08908
Bloc1s1	-0.114595	9.43744	-2.29485	0.0699381	0.0773666	-6.75737
Ddx51	-0.114342	6.24588	-0.932533	0.393646	0.41061	-8.43579
Ap4s1	-0.112057	10.4018	-1.1486	0.30242	0.318034	-8.21438
Nudt9	-0.110744	8.55957	-0.577616	0.588428	0.604052	-8.72291
Rreb1	-0.109757	7.18584	-0.851434	0.433203	0.449831	-8.51064
Cmbl	-0.109518	9.48529	-0.512627	0.629934	0.644086	-8.763
Bckdk	-0.108822	10.0605	-6.78448	0.00103569	0.00141381	-1.9356
Selt	-0.107603	10.843	-0.872952	0.422419	0.439259	-8.49127
Clcn3	-0.106878	7.77931	-0.585929	0.583241	0.599008	-8.71748
Hspa9	-0.106819	11.3184	-0.597919	0.575808	0.591652	-8.70952
Mrpl37	-0.104978	9.34395	-1.42071	0.214343	0.228322	-7.89951
Gpcpd1	-0.104699	8.4304	-1.3144	0.245484	0.259973	-8.0265
Mybpc3	-0.104645	13.2322	-1.28164	0.255896	0.270475	-8.06467
Csnk1g2	-0.104536	10.5769	-1.50921	0.191313	0.204664	-7.79063
Cpsf3	-0.104271	8.64779	-1.21919	0.276867	0.291829	-8.13605
Pygm	-0.103883	12.1152	-1.5527	0.180889	0.193916	-7.73621
Tmem205	-0.102371	10.3727	-2.391	0.0620358	0.0689392	-6.62831
Fadd	-0.102239	7.7444	-3.33047	0.0205984	0.0238744	-5.40638
Eci2	-0.102182	10.1614	-0.722318	0.502291	0.518551	-8.619
Ginm1	-0.101737	10.4069	-1.06407	0.335715	0.351736	-8.30451
Inpp5j	-0.101215	9.17815	-2.80354	0.0376079	0.0425671	-6.08046
Mrps12	-0.10109	8.80286	-0.755208	0.483983	0.500301	-8.59273
Ssbp1	-0.10077	7.94394	-0.545816	0.60853	0.623734	-8.74306
Cxxc5	-0.100014	8.19256	-0.649737	0.544378	0.56028	-8.67356
Rnf5	-0.0979877	8.9927	-1.03129	0.349442	0.365723	-8.33829
Fbxw7	-0.0968377	8.16563	-0.758933	0.48194	0.498307	-8.58969
Tmx2	-0.0963383	9.10433	-0.500592	0.6378	0.651672	-8.76995
N6amt2	-0.0959512	7.50246	-0.75682	0.483098	0.499445	-8.59142
Polr2f	-0.0917052	10.7143	-1.12008	0.313316	0.329136	-8.24525
Rbmx	-0.0911928	7.1706	-1.3764	0.226843	0.241021	-7.95299
Aes	-0.0902712	11.7801	-1.57206	0.176427	0.189225	-7.71179
Large	-0.0895334	8.52356	-0.437652	0.679803	0.692483	-8.80385
Ppp2r5d	-0.0892493	8.68166	-4.51361	0.00623738	0.00763443	-4.03698
Tnni3	-0.0878868	13.5912	-4.38817	0.00701089	0.00853351	-4.17234
Gpx3	-0.0867889	11.7151	-0.965602	0.378364	0.394905	-8.40389
Rtn2	-0.085813	9.8408	-0.743622	0.490377	0.506671	-8.60209
Mrps15	-0.0857888	7.82417	-0.55576	0.6022	0.617681	-8.73686
Ensa	-0.0854342	7.83105	-0.717569	0.504974	0.521137	-8.62272
Gstp1	-0.0842144	11.2678	-0.921151	0.39902	0.416017	-8.44659
Psme4	-0.0831152	10.2806	-0.545275	0.608875	0.624015	-8.74339
H1f0	-0.0819297	10.2208	-0.716151	0.505777	0.521904	-8.62382
Krt10	-0.0814125	5.57825	-2.66755	0.044236	0.0498239	-6.2596
Tnrc6a	-0.0813355	7.90531	-4.48826	0.00638537	0.0078101	-4.06415
Nicn1	-0.0805281	7.77659	-0.726806	0.499764	0.516065	-8.61547
Arl3	-0.0784951	9.02189	-0.856387	0.430702	0.447393	-8.50621
Uqcc1	-0.0771768	10.4544	-0.532597	0.617004	0.631679	-8.75113
Alas2	-0.077051	9.59591	-0.15016	0.886477	0.891476	-8.90304
Tars2	-0.0764775	8.51304	-3.58161	0.0157017	0.018441	-5.09834
Ethe1	-0.076077	10.0057	-0.794601	0.46269	0.479368	-8.56004
Pih1d1	-0.0756839	8.95812	-2.55653	0.0506046	0.0566103	-6.40703
Ephx2	-0.0734224	10.3734	-0.551766	0.604737	0.619992	-8.73936
Bckdha	-0.072968	9.99033	-0.997824	0.36394	0.380213	-8.37208
Nagk	-0.0726704	8.21103	-3.18602	0.0241887	0.027862	-5.58762
Trim37	-0.0725752	5.92083	-1.37817	0.226331	0.240555	-7.95087
Hdac5	-0.0722896	9.69426	-2.88117	0.0343223	0.0390251	-5.97903
Slc37a4	-0.0711492	8.47807	-1.46052	0.203673	0.217487	-7.85086
Slc25a28	-0.0692436	8.66575	-0.829628	0.444344	0.460962	-8.5299
Hsdl2	-0.0673368	10.3541	-0.420877	0.691232	0.703469	-8.81218
Snapin	-0.0667702	9.19173	-0.701665	0.514032	0.530047	-8.63501
Pex11a	-0.06537	8.59755	-0.555464	0.602388	0.617801	-8.73705
Dym	-0.0651727	8.80448	-1.09625	0.322682	0.338691	-8.27069
Fgfr1op2	-0.0646854	8.98067	-0.767346	0.477348	0.493793	-8.5828
Socs2	-0.0646458	8.76319	-1.22585	0.274559	0.289432	-8.12853
Fam50a	-0.0633417	8.22012	-0.325246	0.758095	0.768651	-8.85378
Idh1	-0.0631647	8.47859	-0.880401	0.418734	0.435687	-8.48448
Mrpl38	-0.0617295	9.71346	-0.939506	0.390383	0.407255	-8.42913
Klhl9	-0.0616374	9.35775	-0.461406	0.663784	0.677033	-8.79155
Rnf13	-0.0614661	8.33907	-0.473582	0.65565	0.669128	-8.78501
Mrps17	-0.0612246	10.0243	-0.421781	0.690614	0.702922	-8.81174
Lamp1	-0.0598344	12.0626	-1.3996	0.220214	0.234427	-7.92508
Twsg1	-0.0591965	8.91777	-0.592568	0.579118	0.594914	-8.71309
Fryl	-0.058817	8.69715	-3.48686	0.0173746	0.0203075	-5.21348
Dctn2	-0.0582434	8.69059	-0.584489	0.584137	0.59985	-8.71842
Nrp1	-0.0568103	9.46314	-0.543609	0.60994	0.624959	-8.74442
1700021F05Rik	-0.0567485	8.12296	-0.376956	0.721594	0.733173	-8.83254
Dusp19	-0.0565828	7.91314	-1.68483	0.152518	0.164248	-7.56773
Ndufa2	-0.05589	11.4347	-0.60601	0.570827	0.586879	-8.70408
Sorbs1	-0.05517	8.77724	-0.43207	0.683595	0.696102	-8.80666
Isca2	-0.0545033	10.1149	-0.749614	0.487063	0.503365	-8.59726
Map2k5	-0.053573	8.59451	-1.00671	0.360044	0.376368	-8.36318
Tm9sf2	-0.0534978	9.45938	-0.293523	0.780854	0.790626	-8.86532
Plin4	-0.0534258	9.40651	-0.715231	0.506299	0.522381	-8.62454
Acyp1	-0.0528519	9.39829	-0.320824	0.761252	0.771583	-8.85545
Hnrnph3	-0.0522289	8.85807	-0.621534	0.561344	0.577361	-8.69345
Suclg1	-0.0515456	11.8364	-0.516034	0.627717	0.642045	-8.761
Abcd3	-0.0511656	8.92317	-0.480418	0.651107	0.664646	-8.78127
Zfp612	-0.0506768	4.62267	-2.9211	0.0327579	0.0372852	-5.92713
Tmem223	-0.0495961	10.4176	-2.00138	0.101451	0.110838	-7.151
Pcyt1a	-0.0478985	8.32997	-0.443612	0.675765	0.68853	-8.80082
Comt	-0.0474487	11.3872	-0.184021	0.86119	0.867544	-8.89629
Ctsd	-0.0455814	12.5084	-1.04004	0.345731	0.36197	-8.32934
Rpap1	-0.0446604	8.00609	-0.997828	0.363938	0.380213	-8.37207
Sec14l1	-0.0446477	8.25827	-0.458154	0.665965	0.679179	-8.79327
Pfkm	-0.0440699	12.0054	-0.385317	0.715767	0.727591	-8.82882
Armc1	-0.0436134	8.74496	-0.254954	0.80886	0.817656	-8.87781
Fbxo21	-0.0422815	7.60213	-0.887083	0.41545	0.432527	-8.47835
2010107E04Rik	-0.0421687	12.4944	-0.629434	0.556558	0.572613	-8.68796
Rtn3	-0.0419838	9.32121	-0.376493	0.721917	0.733416	-8.83274
Itsn1	-0.0416725	8.68534	-1.00011	0.362935	0.379254	-8.36979
Siae	-0.0416489	6.0141	-2.69951	0.0425694	0.0479963	-6.21734
Serpini1	-0.0409322	7.9685	-0.604174	0.571955	0.587969	-8.70532
Penk	-0.0402125	6.92572	-0.311341	0.768038	0.778101	-8.85898
Zbtb17	-0.0400758	9.19696	-2.36422	0.0641351	0.0711725	-6.66423
AA407107	-0.0389809	6.64294	-0.351056	0.739779	0.750864	-8.84355
Coq5	-0.0389343	9.1524	-0.338328	0.748788	0.759744	-8.84868
Nae1	-0.0387906	8.66101	-0.233905	0.824286	0.832768	-8.88391
Ubac2	-0.0384913	5.75551	-0.380027	0.719451	0.731166	-8.83118
Kazald1	-0.0383236	6.25465	-0.778389	0.471369	0.48807	-8.57365
Ltbp4	-0.0379819	11.0517	-0.179054	0.864888	0.871069	-8.89737
Pla2g12a	-0.0377036	8.76977	-0.169869	0.871738	0.877259	-8.89927
Fv1	-0.0376664	8.58434	-0.178579	0.865242	0.871325	-8.89747
Rnf34	-0.0373998	7.70008	-0.396803	0.707798	0.719825	-8.8236
Acsl1	-0.0369045	10.2371	-0.14933	0.887099	0.891999	-8.90318
Ppif	-0.0368373	10.688	-0.213981	0.83897	0.846429	-8.8892
Kcnj12	-0.0363842	6.79606	-1.35396	0.233431	0.24775	-7.97978
Lpl	-0.0359299	12.3981	-0.926882	0.396307	0.413237	-8.44117
Phka1	-0.0355083	7.53116	-0.429223	0.685534	0.697832	-8.80808
Atp2a2	-0.0351243	13.0674	-0.77082	0.475461	0.492016	-8.57993
Gck	-0.034865	8.83749	-2.00307	0.101231	0.110625	-7.14874
Osbp	-0.0347284	9.6092	-2.1648	0.0823878	0.0905768	-6.93208
Smim14	-0.034088	9.61963	-0.291176	0.782548	0.792157	-8.86613
Ndufa9	-0.0339462	12.3019	-0.526018	0.621247	0.635799	-8.75509
Lpcat1	-0.0339425	6.57626	-0.908151	0.405228	0.422237	-8.45881
Spa17	-0.0338541	5.73296	-0.907046	0.405759	0.42274	-8.45985
Mtss1l	-0.0337572	8.50231	-0.300506	0.775821	0.785713	-8.86288
Jagn1	-0.0321472	8.92016	-0.199842	0.849437	0.856395	-8.89268
Ndufs2	-0.0316537	12.4024	-0.633526	0.554089	0.57014	-8.68509
Htatip2	-0.0313596	7.21723	-0.665092	0.535283	0.551309	-8.66242
Uty	-0.0312511	6.27796	-2.00512	0.100967	0.110364	-7.14601
Nsmce4a	-0.0310021	8.7424	-0.176132	0.867066	0.87286	-8.89798
Crat	-0.0309367	10.5381	-0.431582	0.683927	0.696359	-8.8069
Anapc11	-0.0304533	9.7244	-0.534648	0.615685	0.630624	-8.74989
Apip	-0.0304498	9.83281	-0.230234	0.826985	0.835302	-8.88492
Hadh	-0.0294914	10.9294	-0.505745	0.634425	0.648299	-8.76699
Dnajb5	-0.0292399	9.2823	-0.372	0.725059	0.736522	-8.8347
Gpx4	-0.0285066	10.4835	-1.14326	0.304434	0.320037	-8.22019
Ghr	-0.0279699	8.74385	-0.195104	0.852952	0.859543	-8.89379
Suds3	-0.0279516	9.16936	-0.391324	0.711594	0.723518	-8.82611
Dsg2	-0.0271146	7.97217	-0.573185	0.591205	0.606759	-8.72578
Hsd11b1	-0.024731	8.71659	-0.143933	0.891145	0.895655	-8.90413
Mau2	-0.0234337	8.34324	-0.599367	0.574915	0.590804	-8.70855
Mapk9	-0.0232258	7.47806	-0.257194	0.807224	0.816191	-8.87713
Rhpn2	-0.0225942	6.01763	-0.150538	0.886194	0.891294	-8.90297
Slc25a20	-0.021887	11.1709	-0.221901	0.833124	0.841016	-8.88715
Irgm2	-0.0209936	8.19987	-0.137176	0.896216	0.900545	-8.90526
Ptges2	-0.0198695	9.02682	-0.36699	0.728568	0.739914	-8.83686
Gfm1	-0.0186607	9.58541	-0.144402	0.890793	0.895405	-8.90405
Kdm3b	-0.0186081	8.91155	-0.524309	0.622351	0.636706	-8.75611
Rab9	-0.018562	9.22019	-0.16511	0.875292	0.880532	-8.90022
Cox17	-0.0170484	11.6769	-0.125184	0.90523	0.908975	-8.90714
Rhot1	-0.0153252	8.67371	-0.181248	0.863254	0.869523	-8.89689
Rpap3	-0.0140871	7.575	-0.218574	0.835578	0.843201	-8.88802
Ap3b1	-0.0125768	9.47394	-0.219745	0.834714	0.842524	-8.88772
Acadl	-0.0112508	11.5883	-0.147768	0.88827	0.893074	-8.90346
AA414903	-0.00994511	6.32412	-0.279746	0.790817	0.80025	-8.86998
Bcl2l13	-0.00968556	9.84561	-0.0757331	0.942553	0.94504	-8.91308
Ndufa5	-0.00967619	12.8918	-0.132833	0.899479	0.903511	-8.90596
Ppa2	-0.00963967	9.14088	-0.0534347	0.959444	0.961314	-8.91481
Sult1a1	-0.00929216	6.30318	-0.186306	0.859489	0.865931	-8.89579
Ccdc94	-0.00925821	8.1988	-0.228743	0.828082	0.836221	-8.88532
Atp6v1e1	-0.00897753	10.1601	-0.308609	0.769998	0.779905	-8.85997
Rangrf	-0.00839778	9.77816	-0.0930233	0.929479	0.93236	-8.91134
Rnmtl1	-0.00785919	8.08519	-0.0926727	0.929743	0.932518	-8.91138
Tubg1	-0.00774179	9.17489	-0.161628	0.877894	0.883048	-8.9009
Ndufa7	-0.00759002	12.7326	-0.119685	0.909369	0.912921	-8.90795
Syngr1	-0.00744614	10.253	-0.0528933	0.959854	0.961615	-8.91484
Dennd4c	-0.0070944	7.80347	-0.0498879	0.962133	0.963788	-8.91503
Atxn2	-0.00709233	8.88526	-0.0589868	0.955236	0.957317	-8.91444
Fam126b	-0.00634991	6.95895	-0.0379006	0.971226	0.972116	-8.91566
Gnb5	-0.00608	7.28764	-0.0944282	0.928417	0.931402	-8.91118
Ndufc1	-0.00587896	12.7138	-0.0695924	0.947202	0.949483	-8.91362
Pex2	-0.00527499	8.05924	-0.0388369	0.970516	0.971628	-8.91562
Ccdc53	-0.00392863	7.98649	-0.0430805	0.967296	0.968626	-8.91541
Adh5	-0.00375253	10.2713	-0.045356	0.96557	0.967009	-8.91529
Pik3r1	-0.00308651	7.60234	-0.0344535	0.973842	0.974622	-8.91581
Atxn7l1	-0.00269734	7.38036	-0.0471372	0.964219	0.965767	-8.91519
Prkar1a	-0.00247881	12.3217	-0.0265013	0.979877	0.980326	-8.9161
Mrpl27	-0.00243928	9.68643	-0.0241892	0.981632	0.98197	-8.91617
Cish	-0.00212539	9.87871	-0.123553	0.906457	0.910103	-8.90738
Adcy9	-0.00160712	8.11182	-0.0341715	0.974056	0.974725	-8.91582
Yif1a	-0.00151899	10.1621	-0.0270043	0.979496	0.980056	-8.91608
1110001J03Rik	0.00013927	11.3278	0.00160282	0.998783	0.998783	-8.91652
Prpf4b	0.00142236	6.10669	0.013082	0.990066	0.990179	-8.91642
3110002H16Rik	0.00157088	8.487	0.0381633	0.971027	0.972028	-8.91565
Slc25a36	0.00268933	9.60243	0.0167149	0.987307	0.987533	-8.91635
Gcap8	0.00427084	4.99675	0.110235	0.916489	0.919752	-8.90925
Ntpcr	0.00452636	8.26065	0.114069	0.913598	0.916956	-8.90873
Psmg1	0.00521842	8.69035	0.0558854	0.957586	0.959563	-8.91465
AI314180	0.00574511	9.46935	0.0394025	0.970086	0.971309	-8.91559
Mrpl4	0.00618946	10.6169	0.0718863	0.945465	0.947851	-8.91342
Igfbp6	0.00619937	9.26028	0.060708	0.953931	0.95612	-8.91431
Trappc2l	0.00657266	10.0587	0.117921	0.910697	0.914149	-8.9082
Tfam	0.00662508	4.76188	0.429411	0.685406	0.697783	-8.80798
Cdadc1	0.00750841	7.29888	0.166755	0.874063	0.879498	-8.8999
Agpat3	0.00866551	9.5863	0.170266	0.871441	0.877062	-8.89919
Rnf14	0.00958628	9.51723	0.393023	0.710416	0.722403	-8.82533
Shf	0.0104722	6.24024	0.555086	0.602628	0.617975	-8.73729
Txndc9	0.0106446	8.9993	0.186482	0.859359	0.865899	-8.89575
Abcb8	0.0107938	9.14134	0.449875	0.671535	0.684539	-8.7976
Rrm2b	0.0109808	8.34235	0.165225	0.875206	0.880532	-8.9002
Ldb1	0.0111667	8.99098	0.313711	0.76634	0.77647	-8.8581
Hibadh	0.0116053	11.1522	0.101512	0.923069	0.926142	-8.91035
Abcb4	0.0116195	8.51199	0.136346	0.89684	0.901048	-8.9054
Clcn4-2	0.0124484	8.5363	0.171906	0.870217	0.875931	-8.89886
Anapc13	0.0127644	9.52236	0.228737	0.828087	0.836221	-8.88532
Pex6	0.0128182	8.77868	0.209852	0.842023	0.849411	-8.89024
Hnrnpul2	0.0133548	7.63592	0.144675	0.890588	0.895302	-8.904
Rab21	0.0136078	9.07607	0.108968	0.917444	0.920605	-8.90941
Mrps25	0.013936	8.64405	0.217812	0.83614	0.843671	-8.88822
Gnb3	0.0140204	7.91427	0.17729	0.866202	0.872191	-8.89774
Pctp	0.014378	5.26478	0.931926	0.393931	0.410809	-8.43637
Smpd2	0.0147369	8.94984	0.334617	0.751424	0.762152	-8.85015
Gucy1b3	0.014764	6.42622	0.130329	0.901361	0.905298	-8.90636
Chrac1	0.0153429	9.16815	0.239209	0.82039	0.829024	-8.88242
Map1lc3b	0.0155022	10.6028	0.129468	0.902008	0.905844	-8.90649
Polb	0.0159637	7.92213	0.176216	0.867003	0.87286	-8.89797
Atp5e	0.0164192	12.5028	0.196304	0.852061	0.858744	-8.89351
Mapkapk2	0.0166229	10.8397	0.0886933	0.932751	0.935427	-8.91181
Ifngr2	0.016635	9.54156	0.0867111	0.934249	0.936822	-8.91202
Ogfod2	0.0173382	7.20239	0.390092	0.712449	0.724303	-8.82667
Mrpl9	0.0175279	8.08229	0.575736	0.589605	0.605189	-8.72413
Ankrd46	0.0175753	8.35819	0.470713	0.657562	0.671	-8.78656
Ndufv1	0.0182544	13.161	0.338199	0.74888	0.759748	-8.84874
Zfp68	0.0185335	7.55289	0.342655	0.74572	0.756719	-8.84696
Dpp8	0.0193496	8.0672	1.19952	0.283786	0.298798	-8.15814
Acyp2	0.0197904	10.735	0.218925	0.835319	0.843038	-8.88793
Anapc16	0.0210415	8.92669	0.337731	0.749212	0.759997	-8.84892
Tpgs1	0.0211341	8.13389	0.256315	0.807866	0.816746	-8.8774
Hcfc1r1	0.021312	11.117	0.333591	0.752153	0.762803	-8.85055
Perp	0.0213284	11.0447	0.209027	0.842633	0.849928	-8.89045
Cs	0.0215071	12.291	0.331273	0.753801	0.764386	-8.85145
Akt1s1	0.0220195	9.09039	0.205689	0.845104	0.852224	-8.89127
Nfs1	0.0220406	9.83198	0.543411	0.610066	0.625016	-8.74454
Ipp	0.0220783	7.88139	1.42848	0.212219	0.226197	-7.89006
Atp5j	0.022502	12.6607	0.318168	0.76315	0.773418	-8.85645
Commd1	0.0229906	8.23477	0.543268	0.610157	0.625036	-8.74463
Sar1a	0.0233264	11.3241	0.27223	0.796272	0.805677	-8.87243
Zfp758	0.0234155	7.1828	0.321382	0.760853	0.771358	-8.85524
Pik3r2	0.0251162	8.73084	1.62793	0.164151	0.176406	-7.6408
Xpr1	0.0252548	9.75845	0.297029	0.778326	0.788158	-8.8641
C77068	0.0256209	5.55891	1.00971	0.358735	0.37509	-8.36016
Usp19	0.025871	8.9844	0.287653	0.785094	0.79455	-8.86733
Hadhb	0.0261082	12.8506	0.466131	0.660621	0.673965	-8.78903
Rem1	0.026211	7.29256	0.444527	0.675146	0.68798	-8.80035
Cpt2	0.0266498	8.1954	0.810251	0.454425	0.47114	-8.5467
Mrpl16	0.0267343	9.79552	0.196355	0.852024	0.858744	-8.8935
Nqo1	0.0267387	8.17877	0.243993	0.816881	0.825668	-8.88105
Rnf166	0.0267633	8.20051	1.13069	0.309223	0.324915	-8.23382
Ap3s2	0.0274892	7.20818	0.271475	0.796821	0.806139	-8.87267
Lgals4	0.029583	8.00244	0.203248	0.846912	0.853948	-8.89186
Sipa1l2	0.0300873	9.14858	0.226277	0.829899	0.837954	-8.88599
Nlrx1	0.0301668	7.77721	1.51833	0.189079	0.202423	-7.77926
Lamb3	0.0303747	8.37653	0.136234	0.896924	0.901048	-8.90542
Dhrs4	0.0323723	9.95013	0.591315	0.579895	0.595641	-8.71392
Uqcrh	0.032603	12.5128	0.380096	0.719404	0.731166	-8.83115
Ccdc90b	0.032737	6.62591	0.207068	0.844083	0.851292	-8.89093
Minos1	0.032739	10.299	0.446208	0.67401	0.686902	-8.79949
Tha1	0.0332136	7.15538	1.45966	0.203897	0.2177	-7.85192
Fxyd1	0.0338158	12.364	0.663805	0.536042	0.552025	-8.66336
Nfia	0.0339619	7.88177	0.264538	0.801868	0.811152	-8.87487
Taf1a	0.0341433	8.1719	0.572159	0.591849	0.607349	-8.72644
Cdk5	0.0341958	8.6365	0.532943	0.616781	0.631549	-8.75092
2900097C17Rik	0.0350446	9.95723	0.533282	0.616563	0.631449	-8.75072
Rest	0.03706	7.59464	0.400675	0.70512	0.717186	-8.8218
Anapc2	0.0370685	9.05275	0.37173	0.725247	0.736628	-8.83482
Stk38	0.0370984	6.7089	0.672308	0.531044	0.547136	-8.65711
Psap	0.0376367	9.18733	0.292727	0.781429	0.791116	-8.8656
Mat2b	0.0380968	8.67804	0.478155	0.652609	0.666102	-8.78251
Tex261	0.0382359	9.31324	0.49981	0.638313	0.652044	-8.7704
Hagh	0.0385144	8.99874	0.545061	0.609012	0.624082	-8.74352
Etfa	0.0385645	11.8669	0.242078	0.818285	0.826992	-8.8816
Akt2	0.0387484	10.2193	0.787803	0.466315	0.482894	-8.56578
Mb	0.0387834	13.7059	2.27948	0.0712987	0.078802	-6.77802
Asna1	0.0390123	10.1048	0.379654	0.719711	0.731345	-8.83135
Abhd5	0.0390464	8.70219	0.196446	0.851956	0.858744	-8.89348
Galnt11	0.0394568	7.73879	0.514164	0.628933	0.643139	-8.7621
Fabp3	0.0406061	13.198	0.559873	0.599594	0.61508	-8.73427
Psmb10	0.0407965	9.96353	0.693775	0.518568	0.534597	-8.64103
Cops8	0.0408558	9.22867	0.35802	0.73487	0.746141	-8.84066
Anp32a	0.0419701	8.08842	0.45515	0.667983	0.681078	-8.79485
Clip4	0.0421503	9.72637	0.142671	0.892092	0.896504	-8.90434
Srpk3	0.0424954	8.08732	0.694725	0.51802	0.534096	-8.64031
Stc2	0.0426428	7.7305	0.362199	0.731931	0.743244	-8.8389
F3	0.0430323	7.93773	0.264012	0.802252	0.811445	-8.87503
Ythdf3	0.0433861	8.26009	0.288508	0.784475	0.794017	-8.86704
Tmub2	0.0439582	6.42032	1.55994	0.179208	0.192137	-7.72709
Fnta	0.0444976	9.98158	1.09458	0.323349	0.33935	-8.27246
Sdha	0.0448883	10.5065	0.707684	0.510591	0.526685	-8.63038
Trappc3	0.0460352	8.40389	0.41985	0.691935	0.704102	-8.81268
Dhrs3	0.0460427	8.24345	0.352057	0.739073	0.750235	-8.84314
Gimap4	0.0460928	10.1111	0.225961	0.830131	0.838092	-8.88607
Zfand5	0.0467945	9.92794	0.259798	0.805324	0.814364	-8.87634
Tsc2	0.0474184	9.2535	1.32801	0.241274	0.255701	-8.0105
Nub1	0.0477514	8.17079	1.90637	0.114605	0.124571	-7.27744
Jup	0.0487502	10.3814	0.552088	0.604533	0.619856	-8.73916
Sdhc	0.0488714	12.7086	1.99743	0.101966	0.111372	-7.15628
Tm7sf3	0.0490533	8.45396	0.628813	0.556933	0.572932	-8.68839
Dnajc13	0.049714	7.03605	0.262267	0.803523	0.812637	-8.87557
Mrps21	0.0499742	10.6365	0.525741	0.621425	0.635833	-8.75525
Psmd7	0.050058	10.3283	0.309977	0.769017	0.779002	-8.85947
Xrn1	0.0503326	7.75449	0.434385	0.682021	0.694661	-8.8055
Pam16	0.0505593	9.86605	0.918289	0.40038	0.417335	-8.44929
Mknk2	0.0506435	10.3241	0.414826	0.695378	0.707441	-8.81511
Decr1	0.0525827	10.3247	0.499999	0.638189	0.651993	-8.77029
Acaa2	0.0529572	12.4495	1.29924	0.250253	0.264799	-8.04422
1810058I24Rik	0.0541474	10.7943	0.578309	0.587995	0.603677	-8.72246
Rnf6	0.0547618	7.22255	0.237888	0.82136	0.829907	-8.88279
Ssbp2	0.0549453	9.4146	0.352368	0.738853	0.750099	-8.84301
Arl6	0.055721	7.31014	1.27521	0.257984	0.272584	-8.0721
Lifr	0.0560955	7.02114	1.3216	0.243247	0.257667	-8.01804
Kdelr1	0.0570344	11.0049	0.525882	0.621335	0.635815	-8.75517
Fam189b	0.057341	5.65288	3.29142	0.0215059	0.0248833	-5.4551
St6galnac2	0.05798	8.07569	1.15875	0.29862	0.314113	-8.20328
Mef2d	0.0579801	11.0966	1.42721	0.212564	0.226538	-7.8916
Dnajc11	0.0580505	8.88251	0.969322	0.376675	0.393236	-8.40025
Vegfb	0.0589536	11.0427	1.08554	0.326972	0.342945	-8.28202
Vps28	0.0612863	10.3582	0.621491	0.561371	0.577361	-8.69348
Cd81	0.0613669	10.7383	0.769823	0.476002	0.492517	-8.58075
Samm50	0.0625033	10.8061	0.850838	0.433505	0.450091	-8.51117
Tmem14c	0.0626764	9.58982	0.469945	0.658074	0.671445	-8.78698
Adsl	0.0626802	9.33939	0.5213	0.624299	0.638624	-8.75789
Ndufa10	0.0628073	9.58884	1.57908	0.174837	0.18759	-7.70292
Atp1a1	0.0630066	9.34919	0.499549	0.638484	0.652142	-8.77055
C78444	0.0631509	7.52215	0.592883	0.578923	0.594783	-8.71288
Ulk1	0.0641924	8.77099	0.675852	0.528971	0.545193	-8.65448
Itgb5	0.0643643	9.15325	2.42443	0.0595185	0.0662598	-6.58351
Atf6	0.0650689	8.90451	0.416134	0.694481	0.706611	-8.81448
Map1lc3a	0.0650729	11.4974	0.546067	0.608369	0.623643	-8.7429
Cox7b	0.065611	12.4873	1.10387	0.319664	0.335643	-8.2626
Dohh	0.0657267	8.34292	0.432722	0.683151	0.695732	-8.80633
Nsun4	0.0657842	7.85589	0.867693	0.425035	0.441769	-8.49603
D10Jhu81e	0.0666627	11.8007	1.93389	0.110623	0.120422	-7.24091
Id1	0.0670496	9.8019	0.44644	0.673853	0.686823	-8.79937
Zkscan1	0.0671253	7.64597	1.22827	0.273724	0.288586	-8.12579
Gtf2h4	0.0681679	8.11162	0.704147	0.512612	0.528706	-8.63311
Arpc1a	0.0683623	8.55958	0.795662	0.462127	0.478954	-8.55914
Eif2b4	0.0689093	9.40317	0.532905	0.616805	0.631549	-8.75095
Wbp1l	0.0695382	9.45211	0.73947	0.492684	0.508994	-8.60542
Fam96a	0.0698738	9.20439	0.878759	0.419544	0.436426	-8.48598
Ppm1a	0.069947	9.21941	0.584392	0.584198	0.59985	-8.71849
Myo10	0.0699534	8.80855	1.02592	0.351737	0.367993	-8.34377
Paqr7	0.0699662	9.02618	0.667454	0.533893	0.549942	-8.66069
Dnaja3	0.070699	10.4629	0.766221	0.47796	0.494367	-8.58372
Srst	0.0720702	10.4859	0.45081	0.670905	0.683977	-8.79711
Zbtb16	0.0722138	9.3236	0.775447	0.472956	0.489656	-8.5761
Gbp3	0.0724887	7.85716	0.491074	0.644059	0.657759	-8.77534
Def8	0.0725898	7.68065	1.13166	0.30885	0.324562	-8.23277
Cyb5r4	0.0728132	8.74597	0.461799	0.66352	0.676843	-8.79134
Ncaph2	0.0728503	8.51408	1.74735	0.140686	0.151898	-7.48665
Myh6	0.0728986	13.767	3.41017	0.0188779	0.021994	-5.30764
Prpf19	0.0739373	9.11979	0.673801	0.53017	0.5463	-8.65601
Usp24	0.0741221	8.77232	0.65031	0.544037	0.559994	-8.67315
Slc44a1	0.0741399	7.89063	4.61805	0.00566812	0.00696401	-3.92599
Poldip2	0.0741952	9.45716	1.54973	0.181583	0.194612	-7.73994
Pnrc2	0.0742113	10.634	0.489418	0.645152	0.658798	-8.77627
Clptm1	0.0742833	10.2835	2.13994	0.085025	0.0933704	-6.96545
Siva1	0.0748572	8.88906	3.69801	0.0138921	0.0163885	-4.9587
Extl3	0.0754643	8.94741	1.54053	0.183747	0.196883	-7.75148
Lamtor2	0.0755375	8.83349	0.882149	0.417873	0.434843	-8.48288
Fam134b	0.0759809	12.0003	0.317861	0.763369	0.77355	-8.85656
Tnfsf10	0.0761866	6.20646	4.61269	0.0056958	0.00699606	-3.93164
Tmem245	0.0770568	7.05548	1.72036	0.145675	0.157072	-7.52174
Nrd1	0.0773332	10.4087	1.10425	0.319515	0.335527	-8.26219
Tsc22d4	0.0780003	10.6191	0.480855	0.650817	0.664428	-8.78103
Stat5b	0.0783057	8.27083	1.2978	0.25071	0.265218	-8.0459
Snd1	0.0789869	9.24297	0.509667	0.631864	0.645833	-8.76472
Sugt1	0.0792294	9.23914	0.612561	0.566813	0.582821	-8.69962
Uqcc2	0.0792883	10.2612	0.4812	0.650588	0.664272	-8.78084
Gle1	0.0793581	7.77871	2.19472	0.079327	0.0873437	-6.89188
Mrpl45	0.0794609	9.13655	0.75455	0.484344	0.500615	-8.59326
Prune	0.0796181	9.04688	0.988343	0.368136	0.384414	-8.38151
Pard3	0.0797582	7.60766	0.728579	0.498769	0.515098	-8.61407
Scpep1	0.0804286	7.09969	0.87813	0.419855	0.436645	-8.48655
Sar1b	0.0811407	9.94107	1.01023	0.358509	0.374898	-8.35964
Ndufa3	0.0815422	10.7192	1.52954	0.186369	0.199595	-7.76526
Wdr48	0.0815538	7.47154	0.569923	0.593254	0.608719	-8.72788
Map2k7	0.0818479	7.3617	0.992352	0.366357	0.382647	-8.37753
Map3k5	0.0820261	7.82451	3.28146	0.0217443	0.0251325	-5.46754
Ndufs1	0.0820854	11.9105	1.09209	0.324342	0.34031	-8.27509
Pfdn6	0.0828634	8.96496	1.6586	0.157777	0.16968	-7.60151
Mef2c	0.0829889	7.2465	1.37256	0.227958	0.242087	-7.95759
Dpm3	0.0839213	8.85974	0.640151	0.550106	0.566109	-8.68041
Dync1h1	0.084261	10.6917	0.733628	0.495941	0.512299	-8.61007
B3galt2	0.0844229	6.39626	3.14177	0.0254258	0.029233	-5.6437
Rpp25l	0.084574	8.78234	3.55679	0.0161215	0.018924	-5.12838
Elk4	0.0846454	6.47691	1.25296	0.265341	0.280119	-8.09769
Lhpp	0.0847949	7.7946	1.21822	0.277204	0.29215	-8.13715
Aldh2	0.0849448	8.98604	1.1449	0.303814	0.319424	-8.21841
D17Wsu92e	0.0851574	9.10154	2.96221	0.0312295	0.0356012	-5.87388
Commd3	0.0865321	6.79649	3.04529	0.0283778	0.0324732	-5.76688
Dhx36	0.0874588	7.50673	0.403138	0.70342	0.715539	-8.82065
Tmem234	0.0874589	9.41507	2.3962	0.0616366	0.068513	-6.62134
Aco2	0.0875262	13.3187	3.3545	0.0200618	0.0232925	-5.37652
Uqcr10	0.0876379	12.1954	0.709345	0.509644	0.52577	-8.6291
Tie1	0.0877192	8.86345	1.94433	0.10915	0.118877	-7.22703
Hibch	0.0888459	7.58125	0.512044	0.630313	0.644324	-8.76334
Nfe2l1	0.08998	10.272	0.837914	0.440085	0.456706	-8.52263
Phf12	0.0902218	7.06335	0.657676	0.539663	0.555688	-8.66783
Abcb9	0.0907972	8.30872	0.864114	0.426822	0.443522	-8.49927
Nipbl	0.0909976	7.88594	1.07137	0.332718	0.348722	-8.29689
Slc4a4	0.0932525	7.33955	0.674347	0.529851	0.546036	-8.6556
Sppl2b	0.0933409	8.20462	5.01486	0.00399194	0.00500022	-3.51821
Rnpepl1	0.0938301	9.101	0.916356	0.401301	0.418195	-8.45112
Eno3	0.0939359	13.0756	1.21246	0.279219	0.294202	-8.14364
Sdhb	0.0942686	12.4935	2.42503	0.0594747	0.0662194	-6.58271
Psmc3	0.094646	9.35981	1.00752	0.359689	0.376043	-8.36237
U2af1l4	0.0948226	8.93936	2.30123	0.0693814	0.0767703	-6.7488
Rapsn	0.0952917	8.52007	1.07913	0.329559	0.345576	-8.28876
Nme6	0.095366	7.8259	6.15002	0.00162079	0.00214291	-2.46281
Slc35e1	0.0958657	7.98109	0.655627	0.540877	0.556873	-8.66932
Supt5	0.0960098	9.61106	0.603411	0.572424	0.588382	-8.70584
Ankhd1	0.0966596	7.37491	1.27888	0.25679	0.271388	-8.06786
Ddr1	0.0967565	8.84341	1.39632	0.221139	0.235304	-7.92904
Shfm1	0.0977482	11.151	0.618561	0.563153	0.579125	-8.69551
0610031J06Rik	0.0981317	9.54261	0.869712	0.424029	0.440828	-8.49421
Galm	0.0982069	7.43975	1.8086	0.12999	0.140662	-7.40651
Ralbp1	0.0983327	9.87643	1.07048	0.333084	0.349063	-8.29783
Ehhadh	0.0989499	4.51529	2.30553	0.0690091	0.0763776	-6.74302
Wdr6	0.0995324	8.08505	1.1729	0.293398	0.308732	-8.18772
Add1	0.0996175	10.0519	6.45681	0.00129936	0.00174379	-2.20279
Pcbp2	0.0998879	10.9191	1.01979	0.354369	0.370658	-8.34999
Fgf13	0.100558	7.08984	0.52779	0.620102	0.634777	-8.75403
Tcta	0.10154	9.52146	1.11007	0.317222	0.3332	-8.25598
Timm9	0.102077	7.15726	0.652281	0.542864	0.558853	-8.67173
2310010J17Rik	0.102701	6.88596	3.47874	0.0175272	0.0204722	-5.22341
St3gal5	0.102725	9.10143	1.94124	0.109583	0.11932	-7.23114
Ptcd3	0.10328	9.79976	0.905967	0.406278	0.423231	-8.46085
Fam136a	0.103393	8.31315	0.763377	0.47951	0.495853	-8.58606
Rtfdc1	0.103456	7.45408	0.869344	0.424212	0.440966	-8.49454
Cbx6	0.104298	8.39809	3.7849	0.0126961	0.0150475	-4.85578
Eif2b5	0.104348	8.74199	0.997703	0.363993	0.380223	-8.3722
G0s2	0.104534	9.23954	1.09639	0.322626	0.338673	-8.27054
Nf2	0.104801	9.25941	0.744715	0.489771	0.506105	-8.60121
Tnxb	0.104944	9.00438	0.526662	0.62083	0.635447	-8.7547
Arl1	0.105169	9.61665	2.1659	0.0822725	0.0904614	-6.9306
Gdpd3	0.105414	10.229	0.947505	0.386667	0.403426	-8.42145
Egfbp2	0.106448	6.84024	0.789663	0.465321	0.482037	-8.56421
Tnfrsf19	0.106816	4.52005	1.84517	0.124003	0.134434	-7.35839
Glo1	0.107096	9.33198	1.3781	0.22635	0.240555	-7.95095
Tcn2	0.107247	9.4715	2.66482	0.0443816	0.0499686	-6.26321
Nmi	0.107289	5.53711	3.367	0.0197887	0.0229968	-5.36101
BC005624	0.107292	7.45959	2.18401	0.0804087	0.0885013	-6.90628
Lipe	0.107533	8.42025	0.967419	0.377538	0.39409	-8.40212
Ikbkg	0.107834	8.05613	6.44229	0.00131277	0.00176016	-2.21487
Parp2	0.108328	7.93145	0.719808	0.503708	0.519891	-8.62097
Ncor1	0.108577	9.2515	1.58553	0.173388	0.186058	-7.69476
Arl6ip4	0.109305	8.49663	3.77172	0.0128698	0.0152317	-4.87132
Acy3	0.10939	9.10547	3.21783	0.0233412	0.026907	-5.54746
Ech1	0.109855	12.9704	2.6583	0.0447312	0.0503427	-6.27184
Fastkd5	0.109864	6.75176	0.671574	0.531474	0.547515	-8.65765
Acadm	0.10999	12.7172	1.89869	0.115744	0.125777	-7.28763
Itm2a	0.110125	6.78927	0.438488	0.679236	0.691986	-8.80343
Smarce1	0.110369	7.54875	2.42082	0.059785	0.0665225	-6.58834
Mcm3ap	0.110705	7.49837	1.5219	0.188213	0.20152	-7.77481
Mrps31	0.111188	9.46907	1.002	0.362102	0.378429	-8.3679
Mdh2	0.111274	13.1597	5.87434	0.00199214	0.00259966	-2.7051
Pgm2	0.111319	11.5931	1.58635	0.173205	0.185883	-7.69372
Car2	0.111415	7.28066	1.21093	0.279754	0.29473	-8.14535
Ckap5	0.112004	8.03541	2.01392	0.0998354	0.109141	-7.13425
Pdha1	0.112134	12.8901	2.19301	0.0794995	0.0875226	-6.89419
Atl2	0.112796	8.71254	1.06456	0.33551	0.351564	-8.30399
Ndufb5	0.112984	13.409	2.0761	0.0922158	0.101051	-7.05107
Phyh	0.11335	12.1143	1.88233	0.118207	0.128341	-7.3093
Rfc2	0.113533	8.65252	6.99555	0.000899191	0.00124145	-1.76894
Dscr3	0.11358	8.71286	0.350159	0.740413	0.75142	-8.84391
Unc93b1	0.113687	7.79055	1.43478	0.210512	0.224433	-7.88238
Tnpo3	0.113896	8.51041	0.514669	0.628605	0.642878	-8.7618
Anapc5	0.114417	11.2992	2.61434	0.0471712	0.0529524	-6.33014
C030006K11Rik	0.115659	8.6137	2.06902	0.0930509	0.101928	-7.06054
Uqcr11	0.116242	12.5751	1.23689	0.27077	0.285643	-8.11601
Lrpprc	0.117134	10.4093	1.40157	0.21966	0.233872	-7.9227
Cox8b	0.117236	10.9028	1.35437	0.23331	0.247664	-7.97929
Rasa4	0.118129	7.46754	2.19063	0.0797381	0.0877742	-6.89738
Lrrc57	0.118133	5.72489	7.65693	0.000590458	0.000853784	-1.27224
Dram2	0.118841	4.70123	2.22479	0.0763734	0.084187	-6.85149
Smim20	0.118933	6.96636	2.04025	0.0965315	0.105621	-7.09906
Ttc17	0.119534	8.43913	0.720897	0.503093	0.519318	-8.62011
Stx4a	0.119672	9.26123	0.900152	0.409085	0.426003	-8.46627
AK134344	0.120005	4.8929	1.44422	0.207979	0.221895	-7.87085
Suclg2	0.120303	10.8131	1.32508	0.242174	0.256593	-8.01395
Med28	0.120517	8.18191	1.15994	0.29818	0.313689	-8.20198
Psma7	0.120776	10.324	0.794926	0.462518	0.479303	-8.55977
Sgce	0.121497	9.00663	1.51672	0.189471	0.202792	-7.78127
Blcap	0.121802	8.66311	1.01608	0.355972	0.37229	-8.35374
Zfp60	0.121901	4.8308	4.16884	0.00864688	0.0104015	-4.41456
Pin1	0.122257	8.0775	1.85836	0.121912	0.132265	-7.34098
Numa1	0.122263	9.25808	3.84563	0.0119301	0.0141734	-4.78452
Me1	0.122416	9.93443	1.5128	0.190429	0.203768	-7.78615
Rnf8	0.122703	7.62603	2.02777	0.0980829	0.107292	-7.11574
Rad21	0.122944	9.98531	1.68199	0.153079	0.16479	-7.57139
Ergic3	0.123401	9.31339	2.12533	0.0866168	0.0950706	-6.98506
Foxred1	0.123928	9.94302	2.3185	0.0678987	0.0751868	-6.7256
Txnrd2	0.124313	8.03465	3.32343	0.0207589	0.0240476	-5.41515
Apbb1	0.124442	9.9753	2.11002	0.0883184	0.0968653	-7.0056
Echs1	0.124952	11.2799	1.70039	0.149484	0.161079	-7.54762
Osbpl1a	0.125729	7.97868	1.06001	0.337389	0.353405	-8.30873
Rpp21	0.126424	8.59398	2.57769	0.0493173	0.0552692	-6.37886
Hdlbp	0.126659	11.2138	3.09133	0.0269237	0.0308982	-5.70795
Dnal4	0.126821	8.26852	2.59041	0.0485605	0.054442	-6.36193
Timm22	0.126964	7.52459	1.91603	0.113191	0.123125	-7.26463
Ctla4	0.127226	5.72174	1.87805	0.118859	0.128985	-7.31495
Atf5	0.127498	8.65864	0.508149	0.632854	0.64677	-8.7656
Sap30l	0.127529	8.52912	1.32363	0.242621	0.257034	-8.01565
Kifc3	0.128053	8.42901	0.794812	0.462578	0.479309	-8.55986
Ptpro	0.128233	6.29207	2.56115	0.0503201	0.0563137	-6.40087
6330416G13Rik	0.128376	7.61258	7.32874	0.000724551	0.00102562	-1.51405
Nde1	0.128514	8.30393	0.918861	0.400108	0.417101	-8.44876
Mdp1	0.128579	9.07081	1.28522	0.254737	0.269315	-8.06052
Swi5	0.128616	9.5299	1.36468	0.230261	0.244503	-7.967
Rmi1	0.128681	5.57093	1.69286	0.150944	0.162612	-7.55735
Fto	0.128685	9.1894	8.34087	0.00039457	0.00059641	-0.795395
Uqcrc2	0.129635	12.5335	1.32886	0.241012	0.255454	-8.00949
Slc27a1	0.130427	10.1888	1.39806	0.220649	0.234839	-7.92694
Ank1	0.130757	9.70394	1.31103	0.246534	0.261022	-8.03044
H2-Ke6	0.131091	7.86706	7.12433	0.000826354	0.00115107	-1.66927
Prkaca	0.131567	10.5855	0.856902	0.430442	0.447177	-8.50575
Fam220a	0.131738	8.91167	1.1819	0.290117	0.305353	-8.17776
Saysd1	0.131877	8.39849	2.70323	0.0423804	0.0477956	-6.21243
Mrps24	0.132289	10.0902	1.32555	0.24203	0.256471	-8.0134
Tmem50b	0.132415	7.715	2.63489	0.0460128	0.0517052	-6.30286
4833420G17Rik	0.132417	7.16861	3.04361	0.0284323	0.0325313	-5.76902
Rpa1	0.133022	8.6432	3.11588	0.0261825	0.0300793	-5.67663
Npepps	0.133046	9.57447	2.77445	0.0389277	0.0440153	-6.11863
Grpel1	0.133321	9.20798	0.731798	0.496964	0.513295	-8.61152
Nptn	0.133383	9.68588	2.00359	0.101164	0.110566	-7.14805
Chchd10	0.134574	13.2267	1.98264	0.103915	0.113402	-7.176
Unc50	0.135551	9.82944	0.775113	0.473137	0.489785	-8.57638
Dag1	0.135591	10.3835	1.48205	0.198114	0.211757	-7.82432
Glg1	0.135599	8.91769	1.335	0.239137	0.253559	-8.00225
Ddt	0.135627	9.50141	1.85307	0.122745	0.133103	-7.34796
Dtd1	0.135862	7.68209	1.3942	0.221741	0.235897	-7.9316
P2rx4	0.136847	7.51652	0.949028	0.385963	0.402739	-8.41998
Pts	0.137815	8.43857	1.48742	0.196751	0.210352	-7.81767
Npr3	0.138021	6.26682	0.818102	0.45032	0.46705	-8.53993
Fxn	0.138029	8.01699	2.48014	0.055567	0.061987	-6.50897
Serf2	0.138637	7.58757	1.83299	0.125964	0.136509	-7.37444
C1qa	0.1388	10.0585	0.884841	0.41655	0.43362	-8.48041
Rfng	0.138923	8.67015	9.0044	0.000274168	0.000431499	-0.364211
Cast	0.139093	8.6856	1.45884	0.204111	0.217901	-7.85292
Kif1b	0.13945	8.21923	1.37417	0.22749	0.241678	-7.95566
Trak2	0.139755	9.24842	0.456595	0.667012	0.680167	-8.79409
D15Ertd30e	0.140043	6.40946	5.131	0.00361612	0.00455955	-3.4029
Timm8b	0.141572	9.85103	1.51745	0.189293	0.202627	-7.78036
Slc16a1	0.142213	8.16888	0.763706	0.479331	0.495726	-8.58579
Cmtr1	0.142275	8.18459	7.82675	0.0005327	0.000779035	-1.15054
AI594671	0.142409	4.13688	3.42067	0.0186635	0.021753	-5.29469
Naa38	0.142479	7.69699	1.2718	0.259101	0.273731	-8.07604
Smc6	0.142938	6.83085	8.65962	0.000330233	0.000508383	-0.584632
Wdtc1	0.143436	9.4572	2.8425	0.0359176	0.0407436	-6.02949
Fert2	0.143458	6.68238	9.2984	0.000235118	0.000378284	-0.182102
Snx14	0.143615	7.82204	0.901667	0.408352	0.42529	-8.46486
Mapre2	0.143904	7.27158	1.14936	0.302134	0.317771	-8.21355
Elmod3	0.144177	8.10879	2.33785	0.0662774	0.073466	-6.69962
Tmem141	0.145123	8.17176	4.7963	0.00483012	0.00599597	-3.74013
Slc25a4	0.145248	13.563	8.10714	0.000451322	0.00067126	-0.954444
Mrps36	0.145503	10.2068	1.60524	0.169032	0.181473	-7.66973
Cuedc1	0.146534	7.77162	5.04893	0.00387716	0.00486622	-3.4842
Psmb6	0.146553	10.5653	1.59659	0.170929	0.183464	-7.68072
Hist1h1c	0.146768	10.133	1.30424	0.248669	0.263187	-8.03838
Akr1e1	0.147024	5.77833	5.30182	0.00313588	0.00399087	-3.23649
Exoc4	0.147529	8.07481	7.104	0.000837375	0.00116494	-1.6849
Nr0b2	0.147994	7.74363	3.66886	0.0143218	0.0168703	-4.99348
Ugp2	0.148059	9.82027	0.725789	0.500336	0.516594	-8.61627
Wdr13	0.148164	8.7589	2.60949	0.0474492	0.0532508	-6.33658
Mff	0.148235	9.10508	4.15183	0.0087912	0.0105664	-4.43364
Stub1	0.148704	9.90217	1.42167	0.214081	0.228071	-7.89835
Ctsh	0.149192	8.80547	2.53569	0.0519086	0.0580171	-6.4348
Hey1	0.149386	8.778	1.23104	0.272773	0.287687	-8.12266
Ptov1	0.150393	9.99486	4.10004	0.00924801	0.0110956	-4.49199
Amotl2	0.150981	9.04343	2.5165	0.0531419	0.0593727	-6.4604
Sfrp1	0.151928	6.93528	1.82234	0.127706	0.138328	-7.38845
Atp6v0e	0.152241	9.13607	1.33265	0.239852	0.254255	-8.00502
Zranb2	0.152571	9.08314	0.788724	0.465823	0.482442	-8.565
Rabep1	0.152715	7.07325	4.29924	0.00762689	0.00923675	-4.2697
Akr7a5	0.152792	10.135	3.03244	0.0287991	0.0329208	-5.78337
Dpep1	0.152834	8.83823	0.768934	0.476485	0.492958	-8.58149
Atp9a	0.153645	9.82855	4.14719	0.00883102	0.0106113	-4.43885
Mfn1	0.153674	9.102	1.27571	0.257822	0.272445	-8.07153
Cnpy2	0.153861	7.16616	1.91067	0.113974	0.123931	-7.27175
Mtm1	0.15524	7.82246	2.33189	0.0667726	0.0739867	-6.70763
Cd34	0.15549	8.74484	1.07513	0.331185	0.347156	-8.29295
Gna11	0.155683	8.77934	2.74388	0.0403702	0.0455991	-6.15884
Fech	0.155867	5.37788	1.95341	0.107884	0.117572	-7.21494
Rab24	0.15648	9.17675	3.52311	0.0167117	0.0195667	-5.16927
Ndufaf4	0.156765	6.68133	2.76183	0.0395162	0.0446634	-6.13522
Vrk3	0.15685	8.38838	1.95692	0.1074	0.117059	-7.21028
Tmem126a	0.157063	10.182	1.23935	0.269933	0.284795	-8.11322
Ift20	0.157948	6.63611	0.86459	0.426584	0.443327	-8.49884
Ssna1	0.158037	9.42332	1.34935	0.234808	0.24918	-7.98526
Mkrn1	0.158528	8.45153	1.53795	0.18436	0.197516	-7.75472
Hdhd2	0.158854	8.39049	1.0839	0.327631	0.343595	-8.28374
Ogt	0.159309	8.35257	0.837181	0.440461	0.457042	-8.52327
Acaa1a	0.15981	9.06491	1.76195	0.138057	0.149134	-7.4676
Kcnj5	0.159971	7.42774	0.87816	0.41984	0.436645	-8.48652
Tk2	0.160322	6.61366	3.52885	0.0166095	0.0194549	-5.1623
Vps53	0.160868	9.06698	6.95965	0.000920836	0.00126853	-1.797
Cdv3	0.160928	8.65399	0.836725	0.440695	0.45723	-8.52367
Klhdc2	0.161056	6.09094	3.07637	0.0273868	0.0314214	-5.72706
Gucd1	0.161188	7.56593	3.40329	0.0190198	0.0221518	-5.31613
Lta4h	0.161937	8.74055	3.32559	0.0207094	0.0239935	-5.41246
Nbr1	0.16225	8.68513	2.07344	0.092529	0.101369	-7.05463
Zfp97	0.162346	5.87029	1.44878	0.206765	0.220654	-7.86527
Ppp3cb	0.162682	7.76651	2.47412	0.0559799	0.0624397	-6.51702
Naa35	0.163448	9.52962	1.62701	0.164347	0.176594	-7.64198
Hps4	0.163452	7.66257	2.45941	0.0570032	0.0635405	-6.53669
Anapc4	0.164075	9.26727	1.26545	0.261189	0.27587	-8.08336
Atp6v1d	0.164121	10.4111	1.02939	0.350253	0.366528	-8.34024
Ube2r2	0.164951	10.868	3.04036	0.0285384	0.0326399	-5.77319
Cry2	0.165339	7.91811	2.85583	0.0353583	0.0401248	-6.01207
Mapkapk5	0.166319	8.9094	1.77147	0.136371	0.147366	-7.45516
Dnajc4	0.166418	8.71414	5.16618	0.00351057	0.00443799	-3.36832
Mrps26	0.166468	7.44286	1.68717	0.152058	0.163772	-7.5647
Mphosph9	0.166834	7.16607	5.7028	0.0022738	0.00294391	-2.86021
Inha	0.166884	8.34105	2.27793	0.0714374	0.0789453	-6.7801
Myom1	0.167188	11.714	1.91345	0.113568	0.123519	-7.26806
Lama5	0.167718	8.67323	2.79439	0.0380175	0.043014	-6.09246
Sod1	0.168073	11.0443	1.44276	0.208369	0.222229	-7.87264
Gpn1	0.169468	9.1536	1.30617	0.248062	0.262576	-8.03613
Prdx5	0.169679	11.238	1.18798	0.287917	0.303074	-8.17101
Tbx3	0.170497	5.8279	1.43888	0.209408	0.223284	-7.87738
Mid1ip1	0.17073	10.5285	0.601294	0.573727	0.589652	-8.70726
Tnnc1	0.171003	13.5374	10.6694	0.00012119	0.000216026	0.603916
Cyfip2	0.171542	8.1405	3.35733	0.0199995	0.0232234	-5.37301
Ncbp2	0.171647	6.58249	0.893664	0.412235	0.429232	-8.47228
Gstm2	0.171712	9.91887	1.98451	0.103667	0.113145	-7.17351
Aqp4	0.171993	5.93939	2.52086	0.0528589	0.0590716	-6.45458
Rarg	0.172043	8.52118	4.83815	0.00465483	0.00579153	-3.69713
Btrc	0.172331	7.17965	3.49199	0.0172789	0.0202011	-5.20721
Ces1c	0.172964	5.98711	1.40962	0.217407	0.231559	-7.91296
Prdx3	0.173002	11.4663	5.57778	0.00250875	0.00323278	-2.97543
Rrp1	0.17316	8.51037	2.12207	0.0869754	0.0954523	-6.98942
Ctsl	0.173397	10.6433	0.80783	0.455696	0.472402	-8.54878
Cyth1	0.173885	7.80027	4.53822	0.00609744	0.00746629	-4.01068
Pten	0.173966	8.48168	2.33418	0.0665821	0.073785	-6.70455
Pex11b	0.174029	8.20253	6.53986	0.00122569	0.00165177	-2.13407
Cops3	0.174352	8.91149	0.991693	0.366649	0.382907	-8.37818
Mrpl24	0.174639	9.85635	1.39049	0.222795	0.236921	-7.93606
Stk11	0.175464	8.6715	3.97658	0.0104518	0.0124885	-4.63274
Slc8a1	0.175626	7.5225	1.81464	0.12898	0.139622	-7.39857
Lamtor5	0.175709	9.25064	2.14219	0.084783	0.0931515	-6.96244
Hbb-b2	0.175806	12.3921	0.512222	0.630198	0.644281	-8.76323
Pqlc3	0.175911	7.21301	3.52992	0.0165905	0.0194405	-5.161
Rere	0.175994	9.28124	5.22097	0.00335325	0.00424894	-3.31479
Lamtor1	0.176065	9.75102	1.96798	0.105887	0.115468	-7.19555
Pstpip2	0.176457	5.31111	3.06773	0.0276582	0.0317037	-5.73811
Ict1	0.176735	8.70357	1.44333	0.208217	0.222095	-7.87194
Zbed3	0.176856	8.88328	3.50081	0.017116	0.020016	-5.19644
Nudt19	0.177435	8.39101	1.83623	0.125439	0.135974	-7.37017
Sgta	0.177532	10.6533	2.40397	0.0610461	0.0678652	-6.61093
Urod	0.17785	9.093	2.34827	0.0654218	0.0725636	-6.68563
Rabac1	0.177936	12.1954	3.32652	0.0206882	0.0239721	-5.4113
Rin2	0.178081	8.76738	4.24428	0.00803885	0.00971018	-4.33045
Mtx2	0.178638	10.0783	1.33511	0.239104	0.253555	-8.00212
Smad6	0.178649	8.15893	1.77288	0.136122	0.147116	-7.45331
Homer2	0.178775	9.79709	2.36527	0.0640516	0.0710889	-6.66282
Tmem147	0.178916	9.24529	1.13198	0.308729	0.324474	-8.23243
Cdc123	0.179388	9.01222	3.04855	0.0282718	0.0323562	-5.76269
Cep350	0.179451	8.21006	1.80414	0.13074	0.141457	-7.41236
Impact	0.179769	6.13398	1.99403	0.10241	0.111801	-7.16081
Smim4	0.180328	6.51043	11.6881	7.78e-05	0.000150876	1.12983
Tuba8	0.18063	9.53058	2.62009	0.046844	0.0525987	-6.32251
Ift172	0.181128	9.04167	8.70127	0.000322781	0.000498667	-0.557597
Baz1b	0.182069	8.79005	2.658	0.0447477	0.0503549	-6.27225
Ccndbp1	0.182139	9.80459	8.95109	0.000282052	0.000442234	-0.397802
Elof1	0.182508	8.78227	1.30329	0.248968	0.263471	-8.03949
Pgls	0.182524	9.45863	2.28225	0.0710509	0.0785479	-6.77429
Meig1	0.182826	5.55602	3.43594	0.0183569	0.0214012	-5.27591
Lphn1	0.182866	9.08359	2.20193	0.078608	0.0865848	-6.8822
Zfp644	0.183005	9.23346	0.812283	0.45336	0.470092	-8.54495
Igf2r	0.183318	9.47144	1.37678	0.226734	0.240934	-7.95254
Rwdd4a	0.183371	6.69661	1.61069	0.167847	0.180244	-7.6628
Tgds	0.183672	7.13714	1.24298	0.2687	0.283597	-8.10908
Ppp5c	0.18487	7.33962	3.56275	0.0160194	0.0188067	-5.12115
Fam213a	0.185087	8.17234	1.50601	0.192101	0.205482	-7.79461
Mccc1	0.185115	7.36376	2.17176	0.0816647	0.0898384	-6.92273
Sephs2	0.185176	7.54151	1.927	0.111607	0.121447	-7.25007
Mapk10	0.185725	6.92038	9.1352	0.00025591	0.000406572	-0.282543
Jam3	0.186269	6.82659	9.52496	0.000209483	0.000343041	-0.0452437
Mme	0.186431	6.11386	3.37935	0.0195231	0.0227063	-5.34571
Tnnt2	0.186433	13.2723	7.20365	0.000784956	0.00110113	-1.6086
Zcrb1	0.186578	9.28318	5.04371	0.00389449	0.00488517	-3.4894
Spryd7	0.187273	4.46228	10.0088	0.000165051	0.000280151	0.237461
Mapk8ip3	0.188555	8.84526	7.24079	0.000766421	0.00107703	-1.58039
Dhfr	0.188759	4.69506	11.7668	7.53e-05	0.000147066	1.16864
Inppl1	0.188966	10.3594	1.68104	0.153267	0.164972	-7.57261
2700097O09Rik	0.189494	7.06158	1.68248	0.152982	0.164707	-7.57076
Romo1	0.189595	10.3713	1.71472	0.14674	0.158181	-7.52905
Mrpl43	0.189848	8.80678	1.53137	0.18593	0.199149	-7.76297
Cox5b	0.189887	12.1084	1.91855	0.112825	0.122742	-7.26128
Cuta	0.190245	8.00944	8.06932	0.000461391	0.000685186	-0.980549
Raf1	0.190398	9.59469	3.39734	0.0191436	0.0222857	-5.32348
Slc25a17	0.190705	8.06825	4.70073	0.00526	0.00650189	-3.83923
Wdr61	0.191247	9.6623	0.974415	0.374373	0.39088	-8.39526
Phb2	0.191499	10.3933	1.55247	0.18094	0.193947	-7.73648
Chmp2a	0.192325	9.9277	1.38434	0.224552	0.238732	-7.94346
Ocel1	0.192338	9.39907	2.1406	0.0849535	0.0933077	-6.96456
Slc4a1ap	0.192629	6.77277	2.03123	0.0976497	0.106831	-7.11111
Scnm1	0.192846	7.59297	5.29343	0.00315767	0.0040145	-3.24458
Idnk	0.193254	8.16649	2.64184	0.0456284	0.0512865	-6.29366
Usp21	0.194221	8.42852	2.96183	0.031243	0.035612	-5.87436
Ptprm	0.194716	8.67532	1.70502	0.148593	0.160158	-7.54163
Lap3	0.194842	4.63884	2.24796	0.0741779	0.0818392	-6.82036
Napa	0.195026	10.5548	3.28361	0.0216927	0.0250828	-5.46486
Atp6v0a1	0.19513	7.26376	2.26843	0.0722939	0.0798513	-6.79286
Cpne3	0.195182	9.9634	3.54148	0.0163869	0.0192148	-5.14695
Rgl2	0.195293	8.832	8.6672	0.000328862	0.000506492	-0.579703
Orc4	0.195397	8.29446	0.883374	0.41727	0.434267	-8.48175
Psma4	0.195703	10.465	0.852277	0.432776	0.449441	-8.50989
Ahr	0.19606	6.4307	1.70459	0.148674	0.160226	-7.54218
Cops7a	0.196116	8.92621	8.41977	0.000377352	0.000573045	-0.742574
Kcnj8	0.196824	8.76188	2.60886	0.0474854	0.0532846	-6.33741
Angel2	0.196867	8.76912	1.61865	0.16613	0.178466	-7.65265
Tmem106c	0.197061	8.06668	7.59232	0.000614361	0.000884543	-1.31915
Lrba	0.198031	8.71004	3.98609	0.010353	0.012372	-4.62182
Arfrp1	0.198139	8.78424	1.20796	0.280798	0.295759	-8.14869
Krt7	0.198227	6.35884	3.04181	0.028491	0.0325899	-5.77133
Sparcl1	0.198305	9.92669	1.23031	0.273022	0.287881	-8.12348
Slc38a10	0.198766	6.89225	4.57443	0.00589823	0.0072335	-3.97216
Per2	0.198817	6.98399	1.51425	0.190075	0.203413	-7.78435
Tmco1	0.199134	9.56609	1.65899	0.157696	0.169615	-7.601
Il15ra	0.199138	9.37839	12.7869	5.02e-05	0.000106813	1.65092
Gphn	0.199327	7.9806	1.54377	0.182981	0.196087	-7.74742
Epc1	0.19951	8.95516	3.78083	0.0127494	0.0151037	-4.86058
Hccs	0.199599	8.42185	2.36945	0.0637197	0.0707564	-6.65722
Prkag1	0.199776	8.77154	3.47331	0.01763	0.0205841	-5.23006
Guk1	0.200007	9.26516	2.37374	0.0633801	0.0703883	-6.65146
Cyb5b	0.200627	7.79684	1.74592	0.140945	0.152159	-7.4885
Mlycd	0.201474	10.2606	5.12885	0.0036227	0.00456652	-3.40502
Tekt2	0.201706	6.32905	4.30361	0.00759522	0.00920103	-4.26489
Etfb	0.20178	10.2582	6.42304	0.0013308	0.0017827	-2.23093
Cuedc2	0.202107	8.43707	4.7421	0.00506866	0.00627603	-3.79617
Mgst3	0.202195	8.12415	3.90648	0.0112151	0.013353	-4.71366
Prim1	0.202852	5.27683	13.148	4.38e-05	9.64e-05	1.81291
Pip5k1b	0.202867	8.13473	2.24027	0.0748994	0.0826039	-6.8307
Fam192a	0.202889	8.7003	2.27428	0.071765	0.0792872	-6.785
Gstm1	0.202989	10.5482	2.65478	0.0449214	0.0505373	-6.2765
Ndnl2	0.203386	7.48803	1.72507	0.144792	0.156177	-7.51562
Pccb	0.203505	7.60846	3.80275	0.0124652	0.014787	-4.83478
Eif1ax	0.203642	9.29374	2.97073	0.0309225	0.035265	-5.86286
Cbfa2t3	0.203881	8.04016	3.92198	0.011041	0.0131595	-4.69571
Zfp639	0.20399	8.24551	1.31541	0.245168	0.25967	-8.02531
Rp9	0.204026	9.21985	6.5682	0.00120168	0.00162317	-2.11077
Il18r1	0.204353	5.67142	2.38336	0.062627	0.0695785	-6.63856
Rhoq	0.205263	9.74412	1.42543	0.21305	0.227028	-7.89377
Hspa4l	0.205463	8.70099	2.06751	0.0932304	0.102099	-7.06256
Wfs1	0.206102	10.6202	2.78985	0.0382229	0.0432352	-6.09842
Ndufb9	0.206267	12.4991	2.69873	0.0426096	0.0480354	-6.21838
Cyhr1	0.206298	8.44067	4.60618	0.00572969	0.00703471	-3.93853
Cdc26	0.206991	8.68055	3.17954	0.0243656	0.0280546	-5.59581
Rab7	0.207043	10.117	1.79274	0.132678	0.143465	-7.42732
Slc25a15	0.207164	7.97563	9.83086	0.000179952	0.000301576	0.134947
Rab28	0.207256	9.56631	1.9705	0.105546	0.11511	-7.19219
Tpm1	0.208177	8.10589	3.79505	0.0125642	0.0148983	-4.84383
Fnbp1	0.208828	7.59688	4.1983	0.00840329	0.0101238	-4.38161
Mfge8	0.208835	11.3942	2.07396	0.0924675	0.101314	-7.05393
Polr2j	0.20893	9.49536	2.05005	0.0953307	0.10436	-7.08594
Dffa	0.209275	8.62125	2.43733	0.0585772	0.065245	-6.56624
Mtch2	0.209482	11.1083	2.06247	0.0938314	0.102744	-7.06931
Ubr3	0.209515	7.41424	1.90828	0.114324	0.124281	-7.27491
Fkbp3	0.209682	8.89142	6.38094	0.00137126	0.00183301	-2.26618
Cdc5l	0.209741	7.77572	2.46566	0.0565654	0.0630703	-6.52832
Gja3	0.209936	7.31237	2.888	0.0340491	0.0387196	-5.97015
Arid2	0.210264	8.16692	2.6375	0.0458682	0.0515493	-6.29941
Map2k6	0.210286	5.47741	6.45619	0.00129993	0.00174402	-2.2033
Ubl5	0.21068	11.1281	2.56517	0.0500743	0.0560673	-6.39551
Rnf44	0.211461	8.99069	2.34366	0.0657994	0.0729731	-6.69183
Ubqln2	0.211466	7.73947	2.93967	0.0320573	0.036502	-5.90305
Psmg2	0.211554	8.48268	1.06007	0.337362	0.353405	-8.30866
Trappc1	0.211938	9.64168	3.29098	0.0215163	0.024892	-5.45564
Wac	0.212754	7.08625	0.879336	0.419259	0.436181	-8.48545
Coprs	0.212783	7.01963	5.60806	0.00244933	0.00316134	-2.94735
Aldh9a1	0.213139	7.23214	1.05057	0.341312	0.357428	-8.31851
Cyp2e1	0.213255	8.30973	2.33698	0.0663501	0.0735372	-6.7008
Psmc1	0.214329	9.683	1.07799	0.330024	0.346022	-8.28996
Pkd1	0.214565	8.12894	6.95863	0.000921459	0.00126899	-1.7978
Antxr2	0.215235	7.37771	2.1705	0.0817952	0.0899706	-6.92443
Zfp110	0.216124	7.14979	2.94993	0.0316776	0.0360885	-5.88977
Msrb1	0.216499	11.3906	2.9496	0.0316894	0.0360972	-5.89018
Ddx6	0.216614	8.20754	2.51077	0.0535161	0.059745	-6.46805
Ptgfr	0.217045	6.65878	4.23238	0.0081314	0.00981248	-4.34366
Il17d	0.217246	5.98972	2.97132	0.0309015	0.0352457	-5.8621
Plcb3	0.217674	6.87904	12.016	6.8e-05	0.000135712	1.29
Hpgd	0.217798	5.95039	1.28572	0.254577	0.269179	-8.05994
Ap1ar	0.21849	9.16298	1.99462	0.102332	0.111744	-7.16002
Cipc	0.218875	8.16778	1.02767	0.350985	0.36725	-8.34198
Prkcsh	0.219256	9.38838	2.70505	0.0422881	0.0476976	-6.21003
Rufy1	0.219358	8.39284	7.59325	0.000614009	0.000884327	-1.31847
Irgm1	0.219876	6.83045	5.70577	0.00226854	0.00293753	-2.85749
B9d1	0.21989	7.15297	13.4362	3.93e-05	8.86e-05	1.93917
Cdk2ap1	0.220106	10.4738	1.88966	0.117096	0.127183	-7.29959
Sox18	0.220167	10.0085	0.789515	0.4654	0.482061	-8.56434
Ubap2	0.220551	10.3242	4.55346	0.00601265	0.00736762	-3.99444
Tob1	0.220869	6.97906	2.82327	0.0367408	0.0416234	-6.05462
Clpp	0.22107	9.76178	3.75716	0.0130647	0.0154541	-4.88852
Slc7a1	0.221555	7.3489	2.42423	0.0595339	0.0662684	-6.58379
Dctn6	0.221831	8.9885	2.21611	0.0772147	0.0851036	-6.86316
Lama2	0.222205	9.80693	1.9514	0.108164	0.117848	-7.21763
2810428I15Rik	0.222206	9.73223	2.5678	0.0499144	0.0559105	-6.39202
Atp6v0a2	0.22231	8.56525	3.03554	0.0286966	0.0328122	-5.77938
Pdcd2l	0.222534	9.71578	10.4159	0.000136152	0.000238463	0.465798
Faf1	0.222701	8.53137	4.50722	0.00627428	0.00767853	-4.04381
Lepr	0.223584	5.86361	3.38008	0.0195076	0.0226914	-5.34482
Myl3	0.224018	13.8102	10.46	0.000133395	0.000234387	0.490064
Pum2	0.224614	10.0748	1.9435	0.109266	0.118989	-7.22813
Apod	0.225077	8.02899	1.14516	0.303715	0.319357	-8.21812
Spns1	0.225258	8.93629	7.51697	0.000643703	0.000920569	-1.37428
Ptplad1	0.225522	7.66408	3.02044	0.0291989	0.033356	-5.79879
Rnf167	0.225717	10.4798	8.14549	0.000441377	0.000658149	-0.928078
Zfp30	0.225765	7.33577	4.65305	0.00549104	0.00676356	-3.88915
Nsmce1	0.226029	8.84617	2.02489	0.0984443	0.10766	-7.11959
Aktip	0.226129	6.00288	3.29335	0.0214599	0.0248333	-5.45268
Qars	0.226273	9.30341	3.49168	0.0172847	0.0202052	-5.20759
Zfp651	0.226996	9.28859	5.94166	0.00189296	0.00247726	-2.64515
Vps4a	0.227207	9.34619	3.97394	0.0104795	0.0125198	-4.63578
Brd7	0.22797	6.27586	4.11976	0.00907093	0.0108891	-4.46973
Nrbp1	0.228271	9.50636	12.9464	4.72e-05	0.000101962	1.72296
Yipf3	0.228535	9.62293	13.7177	3.55e-05	8.2e-05	2.05998
Commd4	0.228788	7.83311	6.62825	0.00115263	0.00156054	-2.06168
Astn1	0.228845	6.33873	3.06468	0.0277549	0.0318062	-5.74202
Fdx1	0.228931	9.10228	4.25948	0.00792241	0.00957483	-4.3136
Zdhhc6	0.229166	6.35696	2.58848	0.0486742	0.0545625	-6.36449
Capn7	0.229482	8.55128	6.65138	0.00113437	0.00153868	-2.04286
Nkiras2	0.229685	9.21009	4.23321	0.00812485	0.00980593	-4.34273
Sgpp1	0.230205	7.51636	2.88013	0.0343642	0.0390626	-5.98039
Atn1	0.230638	7.66031	2.33872	0.0662058	0.0733959	-6.69846
Qdpr	0.231272	9.79354	2.81248	0.0372125	0.0421359	-6.06876
Dnase1l1	0.232052	7.22617	5.11236	0.00367359	0.004624	-3.42129
Nudt16l1	0.232392	8.07154	6.05861	0.00173411	0.00228299	-2.54222
Slc25a11	0.234352	11.5921	2.55345	0.0507948	0.0568013	-6.41112
0610011F06Rik	0.234579	7.46679	3.95293	0.0107025	0.0127723	-4.65996
Pkig	0.234767	11.1052	3.55636	0.0161289	0.0189301	-5.1289
Agap3	0.235095	8.20412	15.2211	2.13e-05	5.56e-05	2.66747
Flot1	0.235478	11.1235	7.41186	0.00068745	0.000975945	-1.45197
Stat6	0.235679	8.79591	1.09072	0.32489	0.340844	-8.27654
Zfp692	0.235712	7.18268	2.61281	0.0472589	0.0530441	-6.33217
Gimap1	0.235948	6.90549	4.4726	0.00647882	0.00791664	-4.08098
Lancl1	0.235972	8.95452	5.72113	0.00224157	0.00290562	-2.84347
Atp5c1	0.236114	12.5643	4.64952	0.0055086	0.00678328	-3.89286
Slc50a1	0.236768	8.55487	6.37458	0.0013775	0.0018399	-2.27152
Id3	0.236782	9.35171	1.33742	0.238401	0.252871	-7.99939
Ube2d2a	0.237294	7.65661	4.66167	0.00544839	0.00671293	-3.8801
Htra1	0.237511	9.7744	1.37302	0.227824	0.241974	-7.95703
Rnf181	0.237662	9.79842	3.1742	0.0245124	0.02822	-5.60257
Wls	0.238551	8.49118	1.95237	0.10803	0.117716	-7.21634
Rnf10	0.239071	12.5389	13.5717	3.74e-05	8.52e-05	1.99763
Ccnj	0.239744	6.66536	5.80887	0.00209452	0.00272391	-2.7639
Cacna1g	0.240196	7.22781	4.46655	0.00651537	0.00795908	-4.08749
Ndufv3	0.24074	10.9906	2.48961	0.0549238	0.0612851	-6.49631
9530068E07Rik	0.240746	10.1119	2.19873	0.0789264	0.0869245	-6.8865
Fbp2	0.240761	8.0854	2.64417	0.0455	0.0511487	-6.29056
Abcc2	0.240962	5.81423	13.3457	4.07e-05	9.09e-05	1.8998
Mxi1	0.241339	9.02261	1.93222	0.110861	0.120665	-7.24313
Wrnip1	0.24137	7.59211	1.23275	0.272186	0.287103	-8.12072
Ngrn	0.241956	8.28557	1.77659	0.135473	0.146433	-7.44847
Pdhb	0.242267	11.8945	1.81579	0.12879	0.139433	-7.39707
Lims1	0.24276	9.8988	1.57699	0.17531	0.188073	-7.70557
Dnajc15	0.243061	9.51208	2.04853	0.0955164	0.104537	-7.08798
Gstt1	0.243785	7.94385	2.75234	0.0399649	0.0451589	-6.1477
Rbl1	0.243899	6.35334	5.90627	0.00194435	0.00253951	-2.6766
Leprel4	0.244145	7.85992	3.32931	0.0206247	0.0239017	-5.40782
Ppm1b	0.244414	7.97153	2.62465	0.046586	0.0523224	-6.31645
Pld1	0.244853	6.24864	11.9434	7e-05	0.000138934	1.25487
Txn2	0.246008	11.166	7.10158	0.000838695	0.00116614	-1.68676
Pde4dip	0.246224	8.78576	4.0705	0.00952085	0.011412	-4.52547
Sqrdl	0.246623	5.91935	5.20262	0.00340501	0.00431203	-3.33268
Vps41	0.246798	7.90989	3.11958	0.026073	0.0299614	-5.67193
Esrra	0.246905	9.15799	6.54368	0.00122242	0.00164889	-2.13092
Klf9	0.246977	9.52805	1.76996	0.136637	0.147636	-7.45713
Sgip1	0.247303	7.79534	1.444	0.208037	0.22193	-7.87112
Mbnl1	0.247449	10.1577	2.65025	0.0451674	0.0507879	-6.2825
Plekha5	0.247696	7.49248	9.64194	0.000197555	0.000326073	0.0242733
Kin	0.247999	6.57592	15.3925	2.01e-05	5.33e-05	2.733
Gnpda1	0.248295	7.27812	3.63744	0.0148022	0.0174141	-5.03112
Mgst1	0.24889	6.48025	1.33355	0.239577	0.253995	-8.00396
Ppp1r7	0.249031	8.37741	2.31307	0.0683616	0.0756801	-6.7329
Mrpl28	0.24904	10.5427	2.28581	0.070735	0.0782184	-6.76951
Capn1	0.249442	9.19145	3.93709	0.0108743	0.0129729	-4.67824
Fbxo8	0.249668	6.7647	2.61826	0.0469478	0.0527084	-6.32493
Dgcr2	0.249743	7.92302	5.08081	0.00377323	0.00473919	-3.45252
Lamtor4	0.250133	9.29593	3.69629	0.0139171	0.0164135	-4.96075
Myl2	0.250684	14.0642	8.26792	0.000411323	0.000618613	-0.844617
Styx	0.250746	8.26748	3.87825	0.0115406	0.0137218	-4.74647
Zfx	0.251403	7.96375	3.3207	0.0208213	0.0241167	-5.41855
Bsg	0.252472	12.9052	2.80625	0.0374876	0.0424364	-6.07691
Xdh	0.252934	7.98152	7.99673	0.000481473	0.000712225	-1.03095
Hspa14	0.253127	7.08621	2.7945	0.0380126	0.043014	-6.09232
Ctsa	0.253721	10.0024	3.54341	0.016353	0.0191802	-5.1446
Dnm1	0.253902	8.68254	7.78663	0.000545717	0.000795807	-1.17909
Csrp3	0.253919	12.5752	1.47839	0.199048	0.212704	-7.82884
AI462493	0.254139	8.17444	3.41586	0.0187615	0.0218613	-5.30063
Pex19	0.25421	6.60062	14.5108	2.69e-05	6.66e-05	2.38808
Pex7	0.254377	7.97522	1.20414	0.282148	0.297145	-8.15297
Rars2	0.254547	8.88698	1.69061	0.151384	0.163067	-7.56027
Smpd1	0.254624	9.11659	3.33479	0.0205007	0.0237688	-5.401
Gtf3c2	0.254701	8.24835	3.62437	0.0150074	0.0176422	-5.04681
Npepl1	0.255525	9.19911	7.85132	0.00052491	0.000769317	-1.13312
Snx13	0.255583	7.88985	3.65088	0.0145945	0.017173	-5.015
Mpc2	0.256335	11.6296	2.23507	0.0753911	0.0831253	-6.83768
Tsnax	0.256402	9.42977	6.25217	0.00150433	0.00199891	-2.37513
Cdc37	0.256507	10.0591	3.45915	0.0179015	0.0208842	-5.2474
Higd2a	0.257184	11.3358	4.83411	0.00467144	0.00581136	-3.70127
Synj2bp	0.257309	7.29738	4.05627	0.00965552	0.011567	-4.54163
Reep1	0.257385	7.04447	2.4701	0.0562576	0.0627414	-6.52239
Cox6a2	0.257522	13.6748	15.2016	2.14e-05	5.59e-05	2.65999
Ap2a2	0.257538	9.00104	9.12135	0.000257775	0.000409162	-0.291146
Aldh3a2	0.257633	6.90631	11.3407	9.01e-05	0.000168984	0.955431
G6pc3	0.257872	9.78878	7.07091	0.000855688	0.0011872	-1.71043
Tmem59	0.258008	6.65291	4.56078	0.00597243	0.00732245	-3.98666
Gabarap	0.25808	11.165	2.14057	0.0849572	0.0933077	-6.96461
Nt5dc2	0.258212	8.52588	3.88209	0.0114957	0.013674	-4.742
Cpt1a	0.258679	9.22835	3.63705	0.0148083	0.0174176	-5.03159
Arl8b	0.258814	8.45774	3.4714	0.0176663	0.0206209	-5.23239
Herc1	0.259226	9.41495	1.98493	0.103611	0.113099	-7.17296
Ifrd2	0.259238	9.44692	1.16392	0.296701	0.31217	-8.1976
Mrpl12	0.259263	10.547	2.24369	0.0745775	0.0822593	-6.8261
Gns	0.259421	7.57857	4.42718	0.00675904	0.00824406	-4.13
Pfn2	0.259604	8.43242	9.87735	0.00017591	0.000295938	0.161888
Reep5	0.260536	11.1764	2.88912	0.0340045	0.0386739	-5.96869
Nsmaf	0.261189	5.3292	5.56162	0.00254114	0.00327163	-2.99046
Zfp362	0.261311	7.59888	2.9152	0.0329839	0.0375375	-5.93479
2510039O18Rik	0.261423	8.01145	1.35433	0.233322	0.247664	-7.97934
Atg12	0.261643	8.95865	3.10171	0.0266076	0.0305475	-5.6947
Hfe	0.261643	7.92548	2.65129	0.045111	0.050731	-6.28113
Kl	0.261724	4.27134	3.45238	0.0180331	0.021035	-5.25571
Mrpl36	0.261987	7.27225	7.43272	0.000678492	0.000964481	-1.43647
Plxnb2	0.262738	8.99467	2.82604	0.0366213	0.0414987	-6.05101
Tpp1	0.262968	9.92419	4.16599	0.00867081	0.0104274	-4.41774
Hcn2	0.263021	8.90284	2.40892	0.0606727	0.0674673	-6.60429
Lmo2	0.263322	8.74454	7.54111	0.000634127	0.000908361	-1.35657
Ube3a	0.263488	6.65739	3.16894	0.0246581	0.028384	-5.60924
Sncg	0.264025	7.80111	6.13001	0.00164483	0.00217239	-2.48011
Fntb	0.264114	7.59932	3.47635	0.0175723	0.0205194	-5.22633
Ulk2	0.264307	8.22623	13.4668	3.89e-05	8.78e-05	1.95241
Rdx	0.264307	9.77574	3.02925	0.0289048	0.0330373	-5.78747
Dctn5	0.264351	9.10175	2.5154	0.053213	0.059437	-6.46186
Dmwd	0.264648	8.0503	12.0535	6.7e-05	0.000134003	1.30804
Cyp4v3	0.26496	7.47171	6.04849	0.00174721	0.00229781	-2.55106
Zscan21	0.265756	7.44491	4.69994	0.00526375	0.00650561	-3.84006
Zfp101	0.265908	6.20563	5.35026	0.00301357	0.00384137	-3.18998
Hes6	0.266391	7.43929	4.23992	0.00807262	0.00974424	-4.33529
Cnot8	0.266474	8.37706	17.2718	1.14e-05	3.53e-05	3.40797
Eif3m	0.267415	10.5752	3.03372	0.0287568	0.0328768	-5.78173
Rcbtb1	0.267532	6.61355	6.12507	0.00165083	0.00217932	-2.48439
Cacna1s	0.267712	7.17226	3.46791	0.0177329	0.0206904	-5.23666
Prkce	0.267735	6.50132	3.87792	0.0115444	0.0137244	-4.74685
Utrn	0.267761	8.01017	4.47714	0.00645155	0.00788762	-4.07609
Usp33	0.268842	7.63562	2.36561	0.0640246	0.071077	-6.66237
Sec14l2	0.26889	8.37575	3.09271	0.0268814	0.0308537	-5.70618
Sdhd	0.269393	12.145	3.1534	0.0250939	0.0288666	-5.62893
Dcaf11	0.269477	7.9452	9.69695	0.000192225	0.000318601	0.0567023
Fibp	0.269761	8.07199	2.60289	0.0478303	0.0536647	-6.34534
Tfeb	0.269768	7.62157	7.60915	0.000608025	0.000876865	-1.3069
2019-03-05	0.269835	9.87494	1.81752	0.128503	0.13914	-7.39479
Vac14	0.270186	6.96111	1.82634	0.127049	0.137651	-7.38319
Epn1	0.270272	11.744	16.9294	1.26e-05	3.78e-05	3.29056
AU040320	0.271113	9.75268	17.5725	1.05e-05	3.3e-05	3.50921
Gja1	0.271585	11.0745	1.73514	0.142921	0.154217	-7.50254
Rab18	0.271771	11.0139	2.26723	0.0724029	0.0799616	-6.79447
Clip2	0.271908	6.57185	8.87594	0.000293626	0.000457917	-0.445453
Apoa1bp	0.272056	10.7351	6.88537	0.000967598	0.0013275	-1.85542
Ddhd2	0.27262	7.38329	10.8509	0.000111677	0.000201846	0.700916
Gart	0.273042	8.44575	2.14426	0.0845602	0.0929184	-6.95965
Clpb	0.27395	6.18527	6.86423	0.000981414	0.00134582	-1.87214
Hmbs	0.273957	8.40761	3.15003	0.0251896	0.0289729	-5.63321
Erbb3	0.273982	7.27264	8.56636	0.000347675	0.000533355	-0.645588
Marveld1	0.274802	9.4628	4.41755	0.00682021	0.00831171	-4.14043
Rmdn3	0.275086	7.72269	4.01131	0.0100959	0.0120697	-4.59292
Mtcp1	0.275947	7.2837	6.69338	0.00110208	0.00149812	-2.00883
Bod1l	0.276212	7.0346	2.81895	0.0369288	0.0418255	-6.06028
Aldoa	0.27679	12.7583	7.04487	0.00087043	0.00120651	-1.73059
Rps17	0.277005	12.2521	7.03545	0.000875839	0.00121381	-1.7379
Dgat1	0.277006	8.21986	11.1582	9.75e-05	0.000180223	0.861823
Ehmt2	0.277086	8.96921	3.90996	0.0111758	0.0133116	-4.70963
Fam3a	0.277858	8.28802	7.59274	0.000614202	0.000884459	-1.31884
Mtfr1l	0.278462	9.57976	3.337	0.0204511	0.0237194	-5.39826
Ccng1	0.278602	10.7506	1.49109	0.195826	0.209389	-7.81314
Zdhhc14	0.278717	7.06073	3.84876	0.0118921	0.0141301	-4.78086
Sos2	0.278838	8.21244	2.56279	0.0502197	0.0562157	-6.39868
Vps72	0.279004	9.82879	9.16869	0.000251471	0.00040083	-0.261802
Tusc2	0.279073	7.8765	10.1374	0.0001552	0.000266431	0.310459
Fbln1	0.279891	9.07589	2.20367	0.0784359	0.0864061	-6.87987
Mrpl13	0.279937	9.6084	3.06372	0.0277852	0.0318368	-5.74325
Polr2m	0.28014	10.8552	3.7121	0.0136898	0.0161563	-4.94194
Tomm7	0.280199	10.865	3.02079	0.0291871	0.0333469	-5.79834
Ints9	0.280765	7.71321	5.16453	0.00351544	0.00444286	-3.36994
Mast2	0.280773	10.0406	5.26949	0.00322078	0.00408701	-3.2677
Ckb	0.280779	10.7066	6.54133	0.00122444	0.00165059	-2.13286
Ccdc93	0.280836	6.14027	6.05431	0.00173966	0.00228967	-2.54597
Fmo5	0.281551	6.39426	6.38242	0.00136982	0.00183159	-2.26494
Tdp2	0.281637	6.9956	1.48087	0.198414	0.212053	-7.82577
Vkorc1	0.28164	8.81132	2.40859	0.0606977	0.0674865	-6.60474
Klhl7	0.281967	7.72443	14.4278	2.77e-05	6.81e-05	2.35457
Atg16l1	0.28255	9.16527	3.38805	0.0193384	0.0225035	-5.33495
Sec23a	0.282793	9.08748	2.90302	0.033456	0.03806	-5.95061
Mlh1	0.282805	6.65369	5.65886	0.00235331	0.0030434	-2.90049
Smc3	0.282878	7.74468	2.11672	0.0875697	0.0960804	-6.99661
Acp6	0.282932	8.23352	3.52498	0.0166784	0.0195303	-5.167
Cox14	0.283405	5.80916	17.0675	1.21e-05	3.67e-05	3.33818
Pkp4	0.28344	10.108	2.25735	0.073307	0.0808988	-6.80774
Pnpt1	0.284051	7.45476	11.0886	0.000100527	0.000185004	0.82574
Cox7a2	0.284106	12.7328	3.93466	0.0109009	0.0130001	-4.68105
AW549877	0.284209	8.22037	2.98574	0.0303903	0.0346853	-5.84348
Usp14	0.284408	6.16715	3.79681	0.0125415	0.0148735	-4.84176
Arpp19	0.284409	8.00968	6.14813	0.00162305	0.00214557	-2.46444
Scx	0.284502	10.4036	7.52292	0.000641327	0.000917772	-1.36991
Hspe1	0.284656	10.4021	1.43457	0.210569	0.224467	-7.88264
Ndufb6	0.284827	8.28638	6.96978	0.000914665	0.00126083	-1.78907
Hsd17b10	0.285933	10.7676	2.45782	0.0571149	0.0636488	-6.53882
Fbxo9	0.286155	8.62237	1.23058	0.272929	0.287817	-8.12317
Rbms2	0.286285	8.44733	9.42034	0.000220884	0.00035878	-0.108071
Kcnb1	0.286503	7.33544	2.27727	0.071496	0.0790001	-6.78098
Ccdc58	0.286544	7.37904	1.40867	0.217674	0.231814	-7.91412
Hopx	0.286632	12.2744	1.61371	0.167194	0.179565	-7.65895
Hdac6	0.286878	8.74548	12.1927	6.33e-05	0.000128252	1.3746
Polr2l	0.287292	11.1243	8.37759	0.000386444	0.000585326	-0.770761
Fam32a	0.287897	7.57327	3.14259	0.0254023	0.0292137	-5.64266
Luc7l3	0.288231	6.74095	2.02643	0.0982515	0.107463	-7.11754
Atm	0.288375	6.81692	18.6913	7.7e-06	2.67e-05	3.8714
Abcd2	0.288431	6.19476	10.1065	0.000157502	0.000269536	0.292995
Acot8	0.288648	8.15723	7.42555	0.000681556	0.000968363	-1.44179
Sirt2	0.288676	9.45495	4.35246	0.00725109	0.00880979	-4.2113
Abl1	0.288793	9.41547	7.01157	0.000889726	0.00122974	-1.75646
Plxnd1	0.288898	9.39279	2.70205	0.0424403	0.0478569	-6.21399
Abcc8	0.289498	7.09994	5.11842	0.0036548	0.004603	-3.41531
Gtl3	0.289726	7.15644	2.30742	0.0688457	0.0762065	-6.74048
Arhgef7	0.289786	10.2424	3.32034	0.0208296	0.0241232	-5.419
Rnf11	0.289937	10.7431	3.10243	0.0265858	0.0305305	-5.69378
Mylk	0.290027	9.64831	8.27444	0.000409792	0.000616522	-0.840202
Klc1	0.290087	9.47727	1.96091	0.106851	0.116476	-7.20496
Sptssa	0.290193	8.83023	4.61722	0.00567241	0.0069683	-3.92687
Pmm2	0.29092	8.72467	13.679	3.6e-05	8.28e-05	2.04352
Ube2g1	0.291231	10.6428	2.24672	0.074294	0.081957	-6.82203
Dsp	0.291616	8.9118	3.74076	0.0132883	0.0156995	-4.90792
Cenpk	0.292215	5.24439	9.50683	0.000211408	0.00034574	-0.0560896
Gtpbp2	0.292469	9.26088	2.65621	0.0448443	0.050457	-6.27461
Crcp	0.292781	7.74153	15.8643	1.74e-05	4.77e-05	2.90978
Tagln	0.292784	8.72871	3.56327	0.0160107	0.0187989	-5.12052
Chd4	0.29338	11.0719	2.41974	0.0598652	0.0666033	-6.5898
1110038F14Rik	0.293434	7.99611	4.32092	0.00747111	0.0090645	-4.24585
Pabpc4	0.293634	9.75465	4.96899	0.00415278	0.00519276	-3.56425
Gyg	0.29378	9.11118	2.82406	0.036707	0.0415904	-6.0536
Ttc7b	0.293935	9.07067	5.41169	0.00286639	0.00366445	-3.13142
Thbs3	0.293948	7.18493	3.0688	0.0276245	0.0316776	-5.73675
Mrps28	0.294523	8.81624	3.67818	0.0141829	0.0167112	-4.98235
Dspp	0.29528	5.1327	4.69441	0.00528997	0.00653062	-3.84583
Commd7	0.29574	8.12914	2.8608	0.0351526	0.0399121	-6.00559
Otud4	0.295852	6.57484	7.43896	0.000675841	0.000961338	-1.43185
Ipo11	0.296822	8.40289	2.67931	0.0436145	0.0491366	-6.24404
Hspg2	0.297176	10.2664	2.50626	0.0538131	0.0600688	-6.47407
Olfm1	0.297932	6.12924	12.0752	6.64e-05	0.000133073	1.31848
Swap70	0.298132	6.02328	12.9637	4.69e-05	0.000101508	1.73076
Hsf1	0.298324	8.64786	19.3362	6.51e-06	2.38e-05	4.07047
Sf3b5	0.298406	8.95828	1.52898	0.186503	0.199714	-7.76595
Mrps22	0.298407	7.20771	1.53408	0.185282	0.19848	-7.75958
Hist2h2be	0.29863	6.76978	2.98026	0.0305837	0.0348924	-5.85056
Aass	0.2996	5.62178	4.93393	0.00428086	0.00534374	-3.59964
Krt16	0.300372	5.89943	3.54068	0.0164007	0.0192258	-5.14791
Ppp1r3c	0.300393	8.64086	2.14066	0.0849477	0.0933077	-6.96449
Lars	0.300432	9.3583	2.37569	0.0632267	0.0702269	-6.64884
Tmem159	0.300511	8.65853	3.10215	0.0265943	0.0305363	-5.69414
Fcgrt	0.300737	4.2228	14.7908	2.45e-05	6.21e-05	2.49979
Spag7	0.300741	10.2415	2.959	0.0313459	0.0357199	-5.87803
Stk16	0.301075	7.43193	7.90623	0.000507982	0.000746409	-1.09435
Gnpat	0.301131	9.61031	4.40458	0.00690363	0.00840869	-4.1545
Cntrob	0.30208	7.12542	4.99083	0.0040753	0.00510025	-3.5423
Cdc34	0.302377	8.64724	5.77858	0.00214397	0.00278531	-2.79127
Sppl3	0.302884	8.70804	8.86157	0.000295903	0.000460974	-0.454605
Hrg	0.303091	6.44892	5.01431	0.00399384	0.00500189	-3.51877
Cul2	0.303229	9.22073	7.42923	0.000679982	0.000966285	-1.43906
Rimklb	0.303303	4.98198	7.08485	0.000847913	0.00117716	-1.69966
Atpif1	0.303444	10.8789	4.03459	0.00986508	0.0118103	-4.56633
Ndufv2	0.303831	10.4691	7.9047	0.000508444	0.000746937	-1.09542
Mrps10	0.304019	8.30602	2.31581	0.0681278	0.0754309	-6.72922
Spop	0.304336	9.9812	10.6688	0.000121227	0.000216047	0.603555
Vps16	0.304385	7.36002	7.90844	0.000507314	0.000745653	-1.09279
Usp8	0.304843	7.95615	7.64037	0.000596477	0.000861348	-1.28423
Tmem131	0.304965	8.47723	2.234	0.0754926	0.0832266	-6.83912
Atg14	0.305123	7.28484	3.96364	0.0105881	0.0126426	-4.64762
Atp6v0b	0.305701	10.1933	3.44433	0.0181907	0.0212131	-5.26559
Arhgef1	0.305718	7.27226	1.86207	0.121331	0.131652	-7.33608
Vps54	0.305815	9.60718	7.86105	0.000521861	0.000765362	-1.12623
Timm17a	0.306393	11.0437	2.62847	0.0463711	0.0520945	-6.31138
Mapre3	0.306455	8.04168	6.23036	0.00152834	0.00202928	-2.39376
Eng	0.306936	11.7708	1.99607	0.102144	0.111552	-7.15809
Chl1	0.307182	5.37434	4.05453	0.00967223	0.0115855	-4.54362
Skiv2l	0.307246	8.25821	8.85288	0.00029729	0.000462887	-0.460146
Golga7	0.307364	8.57977	19.6463	6.01e-06	2.26e-05	4.16385
Cox7a2l	0.307703	10.4998	2.51553	0.053205	0.0594356	-6.4617
Gtf2b	0.30875	8.86353	3.41001	0.0188812	0.0219949	-5.30784
Commd6	0.309091	8.57389	1.6846	0.152564	0.164276	-7.56802
1110057K04Rik	0.309317	6.66383	3.85451	0.0118225	0.0140494	-4.77414
Crp	0.309909	5.49251	5.6588	0.00235343	0.0030434	-2.90055
Pkp2	0.309919	8.5289	1.28241	0.255646	0.270244	-8.06378
Hmbox1	0.310391	8.09572	2.59766	0.0481351	0.0539928	-6.3523
Mmp17	0.311395	6.21051	4.30042	0.00761831	0.00922773	-4.2684
Mef2a	0.311668	7.98517	3.18968	0.0240894	0.0277513	-5.58299
St5	0.311727	8.33518	11.7155	7.69e-05	0.000149565	1.14335
Atp5l	0.312116	10.9463	9.86849	0.000176671	0.00029699	0.156764
Tmem259	0.31274	10.3807	4.32015	0.00747658	0.00906988	-4.2467
Il1f5	0.31288	4.69879	11.3203	9.09e-05	0.000170213	0.945053
Pstk	0.313115	8.93656	5.12838	0.00362415	0.0045677	-3.40549
Pigx	0.313233	8.27637	5.02574	0.00395487	0.00495735	-3.50734
Zbtb46	0.313423	6.48385	3.09921	0.0266832	0.0306303	-5.69788
Tfcp2	0.313625	8.2956	5.28742	0.00317338	0.00403272	-3.25038
Rsl24d1	0.313795	9.36268	6.93058	0.000938808	0.00129125	-1.8198
Nr2c1	0.313916	6.97036	2.81426	0.037134	0.0420525	-6.06642
3110043O21Rik	0.313953	7.99588	2.16988	0.0818592	0.0900183	-6.92526
Exoc7	0.314281	7.60072	6.71257	0.00108768	0.00148063	-1.99334
Cenpl	0.314523	7.28572	11.5463	8.26e-05	0.000158053	1.05924
Phldb2	0.314528	7.82555	7.60099	0.00061109	0.000880918	-1.31284
Col14a1	0.315148	6.78852	7.84604	0.000526573	0.000771495	-1.13686
Nek7	0.315157	11.2043	2.68447	0.0433452	0.0488395	-6.23722
Cebpzos	0.315509	7.70718	3.96788	0.0105432	0.0125925	-4.64274
Naa11	0.315646	4.87516	7.60638	0.000609062	0.000878215	-1.30891
Plbd1	0.316049	9.36312	5.43406	0.0028149	0.00360179	-3.11022
Nme2	0.31614	12.5001	4.36869	0.00714078	0.00868664	-4.19357
Ppil2	0.316213	6.77977	8.77934	0.000309344	0.000479859	-0.507228
Azi2	0.316271	7.42847	5.10615	0.00369294	0.00464434	-3.42742
Hebp1	0.316452	8.17409	8.53878	0.000353041	0.000540352	-0.663723
Stat5a	0.316508	9.35161	8.21345	0.000424383	0.000636829	-0.881612
Uqcrb	0.316742	12.2612	4.7709	0.00494026	0.00612834	-3.76635
Adipor2	0.317011	9.69271	2.71984	0.0415459	0.0468907	-6.19051
Klk1b21	0.317432	8.27811	3.92239	0.0110365	0.0131582	-4.69524
Ly6e	0.317727	9.79011	8.30561	0.000402564	0.000607007	-0.81914
Elp3	0.317762	8.78844	11.44	8.64e-05	0.000163721	1.00581
Cox6b2	0.317836	6.92241	6.89548	0.000961071	0.00131959	-1.84744
Tomm70a	0.317941	8.96217	1.33654	0.238668	0.253123	-8.00043
Synrg	0.318108	6.83413	5.45621	0.00276497	0.00354049	-3.08928
Tac1	0.318796	5.55508	3.22759	0.023088	0.0266363	-5.53517
Actr1b	0.318814	8.71365	4.62681	0.00562316	0.00691557	-3.91675
Afg3l1	0.318833	9.31558	7.07626	0.000852697	0.00118343	-1.7063
Bet1	0.318841	6.11313	6.40907	0.00134407	0.00179882	-2.24261
Ssx2ip	0.31899	7.6982	7.75543	0.000556101	0.000809495	-1.20138
Lmf1	0.319199	8.64576	3.9076	0.0112025	0.0133417	-4.71238
Aldob	0.319277	6.00023	5.41946	0.00284838	0.00364249	-3.12405
Efnb3	0.319487	9.53457	2.04707	0.0956939	0.104718	-7.08993
Tpgs2	0.32049	8.94053	20.7729	4.55e-06	1.86e-05	4.49109
Muc3	0.320524	6.6781	6.93192	0.000937971	0.0012905	-1.81875
Neu1	0.320646	7.55352	5.72414	0.00223632	0.00289925	-2.84072
Tmpo	0.320787	7.90849	13.9823	3.23e-05	7.66e-05	2.17146
2610001J05Rik	0.321339	5.41536	4.24246	0.00805288	0.0097231	-4.33246
Ap3m1	0.322648	7.96892	12.174	6.38e-05	0.000129078	1.36573
Aym1	0.322675	7.67175	10.6217	0.000123852	0.000220008	0.578136
Icam2	0.322725	8.7512	5.33482	0.00305195	0.00388746	-3.20478
Gtf3c1	0.322849	9.20519	9.59791	0.000201947	0.000332194	-0.00180137
Sod2	0.322926	10.6259	3.80198	0.0124751	0.0147967	-4.83568
Zfp532	0.32301	7.22612	20.93	4.39e-06	1.82e-05	4.53532
Hr	0.323262	9.06024	5.57681	0.00251067	0.00323478	-2.97633
Cope	0.323285	10.0679	3.07268	0.0275025	0.03155	-5.73179
Elp2	0.323466	6.19484	2.08673	0.0909748	0.0997163	-7.03682
Cdk16	0.323482	9.45549	4.40888	0.00687582	0.00837598	-4.14983
Akt1	0.323617	9.38978	2.38173	0.0627539	0.0697106	-6.64074
Uqcrq	0.323928	13.6474	6.1682	0.00159931	0.00211611	-2.44712
Dip2b	0.324008	8.90933	3.46812	0.0177291	0.0206886	-5.23642
Slc35a1	0.324036	6.96592	2.29419	0.0699956	0.0774205	-6.75825
Ttc14	0.324121	6.07919	7.6542	0.000591447	0.000854932	-1.27422
Fam117a	0.324324	7.41297	6.50551	0.00125555	0.00168785	-2.16241
Copz2	0.324445	9.05643	8.88137	0.000292771	0.000456827	-0.441996
Ckm	0.324796	9.04951	10.1905	0.000151333	0.000260767	0.340385
Zfp930	0.324937	7.43347	5.37924	0.00294306	0.00375697	-3.1623
Abca1	0.325103	8.1838	3.75064	0.0131531	0.0155481	-4.89623
Cd99	0.325468	10.925	4.47582	0.00645947	0.0078941	-4.07751
Lmo4	0.325578	8.58634	6.4926	0.00126699	0.0017027	-2.17308
Meis1	0.325704	6.41075	2.59561	0.048255	0.0541135	-6.35503
Mtr	0.325793	7.62102	7.21978	0.000776845	0.00109028	-1.59634
Ei24	0.325823	9.68519	4.17157	0.00862392	0.0103767	-4.41149
Adig	0.326041	6.76294	5.33145	0.0030604	0.00389709	-3.20801
Adra1b	0.326339	7.84729	4.32358	0.00745229	0.00904544	-4.24294
Ppnr	0.326382	5.54586	18.9517	7.19e-06	2.55e-05	3.9526
Irx3	0.326667	8.88292	6.38091	0.00137129	0.00183301	-2.2662
Sec62	0.326713	7.82891	6.79433	0.0010288	0.00140485	-1.92774
Nr1i2	0.32679	6.64932	20.7424	4.59e-06	1.87e-05	4.48248
Abca2	0.326853	9.48509	3.82092	0.0122352	0.014528	-4.81345
Rprd1a	0.326879	6.69337	12.0059	6.83e-05	0.000136084	1.28514
Pbx1	0.327286	8.02293	15.836	1.75e-05	4.8e-05	2.89929
Pde1c	0.327368	4.74288	10.2059	0.000150231	0.000259072	0.34906
Ik	0.327413	7.37606	1.82587	0.127126	0.137717	-7.38381
Nelfcd	0.327456	7.96649	6.67625	0.00111512	0.00151444	-2.02269
Sptbn1	0.327614	11.473	8.1162	0.000448949	0.000668299	-0.948205
Kitl	0.328251	9.20776	4.06945	0.00953074	0.0114222	-4.52666
Agrn	0.328306	9.20609	9.16017	0.000252592	0.000402323	-0.267073
Fmn1	0.328538	6.47457	4.27323	0.00781874	0.00945477	-4.29839
Nr2f1	0.32887	5.18907	5.35977	0.00299021	0.00381382	-3.18088
Zscan12	0.329126	5.37496	1.61414	0.1671	0.179486	-7.65839
Rbm42	0.329133	9.51462	2.11725	0.08751	0.0960269	-6.99589
Chchd3	0.32943	11.663	1.88705	0.11749	0.127595	-7.30304
Ephb2	0.329579	8.38616	16.2168	1.56e-05	4.41e-05	3.03851
Mocs2	0.329585	7.93603	6.52216	0.00124097	0.00167056	-2.14865
Atp2c1	0.329698	5.76361	13.0605	4.52e-05	9.89e-05	1.77404
Slc6a8	0.32995	8.21039	5.82768	0.00206448	0.00268724	-2.74695
Ptprcap	0.329976	8.28296	20.8291	4.49e-06	1.85e-05	4.50695
Coa3	0.330356	10.2174	3.90174	0.011269	0.0134154	-4.71917
Lrp2	0.330378	5.81564	4.12792	0.00899881	0.010804	-4.46053
Mrps11	0.330454	8.41201	7.54769	0.000631544	0.00090504	-1.35175
Acsf3	0.330498	8.05441	9.98617	0.000166865	0.000282844	0.224498
Ly86	0.330512	7.09018	21.0494	4.26e-06	1.79e-05	4.56868
Sall4	0.330588	5.45037	11.4023	8.78e-05	0.000165514	0.986733
Rad50	0.330757	7.6032	19.6499	6e-06	2.26e-05	4.16494
Supv3l1	0.331094	8.04023	17.1917	1.17e-05	3.59e-05	3.3807
Nme4	0.332096	7.77067	9.65401	0.000196371	0.000324303	0.0313992
4930453N24Rik	0.332102	7.06368	20.7035	4.63e-06	1.88e-05	4.47146
Slc29a1	0.332103	9.47472	2.59662	0.0481954	0.0540536	-6.35367
Igbp1	0.332112	7.33353	5.54855	0.00256772	0.00330341	-3.00264
Arfgap2	0.3323	10.524	10.3434	0.000140829	0.000245572	0.425728
Hsf4	0.332444	7.36536	13.7498	3.51e-05	8.14e-05	2.07365
Rfk	0.332809	9.08003	4.50545	0.00628454	0.00769	-4.0457
Psmd4	0.332995	10.9807	1.98107	0.104125	0.113616	-7.1781
C86187	0.333695	6.29031	3.93684	0.0108769	0.0129733	-4.67853
Sumo3	0.334423	10.6177	3.37058	0.0197113	0.02291	-5.35658
Nfyc	0.334443	9.38013	12.938	4.74e-05	0.000102157	1.71919
Tmem55a	0.334462	8.76312	2.65226	0.0450584	0.0506783	-6.27985
Mrpl41	0.334779	8.67545	9.86096	0.000177322	0.000297912	0.152403
Ung	0.334962	9.22581	2.56408	0.0501408	0.0561345	-6.39696
Irak1	0.335178	9.70863	19.4004	6.4e-06	2.36e-05	4.08993
Wnt5a	0.336528	6.48073	4.27864	0.0077784	0.00940989	-4.29242
Get4	0.337073	8.71846	11.0801	0.000100901	0.000185615	0.821331
Blnk	0.337641	6.60419	15.7639	1.79e-05	4.88e-05	2.87257
Tpi1	0.338244	12.4906	6.36779	0.00138419	0.00184798	-2.27722
Bag6	0.338386	9.0063	3.95832	0.0106447	0.0127051	-4.65375
Rps14	0.339561	6.54206	3.16629	0.0247317	0.028465	-5.61259
Smdt1	0.339915	11.9174	5.17756	0.00347721	0.00439665	-3.35717
Dctn3	0.340541	9.21749	13.5968	3.71e-05	8.47e-05	2.00842
Ndufs4	0.341495	7.27935	2.45896	0.0570343	0.0635671	-6.53728
Tex264	0.341723	8.83421	19.9764	5.53e-06	2.13e-05	4.26164
St13	0.342038	9.06704	5.16064	0.00352695	0.00445547	-3.37375
Bcl6	0.342223	9.05129	2.3634	0.064201	0.0712366	-6.66534
Sec61a2	0.342457	8.6055	18.643	7.8e-06	2.69e-05	3.85619
Huwe1	0.342643	8.30206	20.7055	4.63e-06	1.88e-05	4.47203
Dynlrb1	0.343181	9.18076	5.28437	0.00318138	0.00404112	-3.25332
Sptan1	0.343394	10.0355	2.29971	0.0695138	0.076907	-6.75084
Map3k7	0.343629	5.6824	5.12802	0.00362525	0.00456842	-3.40584
C78704	0.343871	5.61062	13.9611	3.26e-05	7.7e-05	2.16258
Pigk	0.34399	7.82853	6.2169	0.00154339	0.0020477	-2.40528
Abhd14a	0.344178	7.95202	7.95769	0.000492703	0.000726622	-1.05823
Mat2a	0.344356	9.52943	2.87196	0.0346949	0.0394129	-5.99103
Irf2bp1	0.344418	9.38069	6.27578	0.00147882	0.00196651	-2.35502
Mrvi1	0.344629	7.01782	4.60503	0.00573571	0.00704111	-3.93975
Fgf7	0.344702	4.79903	8.10463	0.000451981	0.000672126	-0.95617
Lipa	0.345167	8.79829	6.76714	0.00104795	0.00142877	-1.94948
Lancl2	0.345528	5.91214	7.19703	0.000788319	0.00110461	-1.61365
Polr2g	0.345553	9.94225	7.64695	0.000594077	0.00085845	-1.27947
Pacrgl	0.345627	5.52506	10.8507	0.000111687	0.000201846	0.700808
Bcap29	0.346076	8.89778	5.15354	0.00354809	0.00447893	-3.38073
Cul1	0.346126	9.54453	4.11816	0.00908516	0.0109047	-4.47153
Ktn1	0.346251	5.57391	4.2991	0.00762788	0.00923675	-4.26985
Scaf11	0.346447	7.47465	10.8739	0.000110534	0.000200217	0.713121
Tbcel	0.346594	6.24022	7.99576	0.000481748	0.00071239	-1.03163
Plec	0.346773	8.97595	6.02821	0.00177383	0.00233009	-2.56882
Mtf2	0.347111	5.82342	11.7481	7.59e-05	0.000148015	1.15942
Psme1	0.347134	7.96397	4.03462	0.00986474	0.0118103	-4.56629
Emc10	0.347659	7.16667	11.2321	9.44e-05	0.00017578	0.899929
Ublcp1	0.347826	8.04356	8.56069	0.00034877	0.000534659	-0.649311
Zfp92	0.347974	7.69044	4.01624	0.0100465	0.0120123	-4.58728
BC031181	0.348168	9.08909	2.67224	0.0439868	0.0495497	-6.25339
Laptm4b	0.348256	9.92329	4.88047	0.00448511	0.00558912	-3.6539
Thap4	0.348378	10.1184	15.8858	1.72e-05	4.75e-05	2.91771
Uba7	0.348605	8.57556	19.3417	6.5e-06	2.38e-05	4.07216
Ptdss2	0.348651	8.28816	22.5982	2.99e-06	1.4e-05	4.98509
Chpt1	0.348678	10.8439	3.76268	0.0129904	0.0153683	-4.882
Psma6	0.349069	11.1775	2.65906	0.0446906	0.0503036	-6.27084
Ppox	0.349149	6.73793	18.3885	8.35e-06	2.83e-05	3.77553
Fbxo45	0.349189	8.91197	6.94456	0.000930112	0.00128009	-1.80882
Six5	0.349477	8.52063	11.5971	8.08e-05	0.000155421	1.08464
Usmg5	0.349488	13.3672	8.15262	0.000439557	0.000656191	-0.923186
Ubxn6	0.349908	7.72646	3.54306	0.0163591	0.0191848	-5.14502
Atp6v0d1	0.350133	9.87049	4.67545	0.00538106	0.00663276	-3.86566
Cbr1	0.35018	8.08909	3.68023	0.0141524	0.0166776	-4.9799
Atad1	0.351034	9.64807	3.77623	0.01281	0.0151692	-4.866
Dtna	0.351338	7.5973	7.11795	0.000829791	0.00115568	-1.67416
Plcd1	0.351414	8.53812	4.61018	0.00570887	0.00701111	-3.9343
Galc	0.351574	6.48224	22.7876	2.87e-06	1.37e-05	5.03403
Wbp1	0.351825	10.6492	5.10858	0.00368537	0.00463682	-3.42503
Ctsf	0.352077	8.47293	5.14245	0.00358138	0.004519	-3.39163
Acot7	0.352795	9.85268	4.54284	0.00607159	0.00743568	-4.00575
Fam118b	0.353603	7.27833	11.5349	8.3e-05	0.000158673	1.05355
Zfpm1	0.353743	9.2752	13.8806	3.35e-05	7.87e-05	2.12887
Mycbp2	0.353803	9.25168	2.86163	0.0351183	0.0398783	-6.00451
Ctnnb1	0.354042	11.3861	4.32093	0.00747106	0.0090645	-4.24584
Acox1	0.354067	6.97006	6.65865	0.0011287	0.00153193	-2.03696
Cep131	0.354264	7.71662	8.02361	0.000473919	0.00070212	-1.01225
Blzf1	0.354454	8.15939	2.96436	0.0311517	0.0355172	-5.8711
Psmb7	0.354461	10.6364	6.30076	0.0014524	0.00193375	-2.33381
Nfatc2	0.354542	6.9146	13.7255	3.54e-05	8.19e-05	2.06331
Nit2	0.354798	8.42352	5.37744	0.00294739	0.00376139	-3.16401
Ociad1	0.354801	10.195	4.26831	0.0078556	0.00949671	-4.30382
Ice1	0.355038	8.37892	2.75153	0.0400038	0.045197	-6.14877
Frk	0.355096	5.19302	16.9438	1.25e-05	3.77e-05	3.29556
Coa6	0.35518	6.35737	15.8206	1.76e-05	4.82e-05	2.89359
Kdm5a	0.355214	7.20679	7.14573	0.000814932	0.00113734	-1.65284
Ebp	0.355399	6.87396	14.2296	2.97e-05	7.18e-05	2.27378
Amfr	0.355517	9.40801	15.1837	2.15e-05	5.62e-05	2.65308
Drap1	0.355665	9.14568	4.20268	0.00836774	0.0100851	-4.37672
Zfp260	0.355815	6.55151	4.09785	0.00926795	0.0111164	-4.49447
Zfp524	0.356173	8.20412	5.19455	0.00342806	0.00433681	-3.34055
Fyttd1	0.356231	10.3874	2.43384	0.0588306	0.0655189	-6.57091
Bmp8b	0.356236	6.42298	21.3946	3.93e-06	1.69e-05	4.66413
Fam171a1	0.356509	8.95911	11.3246	9.07e-05	0.000169934	0.947249
Nedd1	0.356805	7.55421	3.77648	0.0128067	0.0151674	-4.8657
Qrsl1	0.357289	7.86695	5.06649	0.0038195	0.00479592	-3.46673
Rnase4	0.357395	8.05103	2.15683	0.0832232	0.0914722	-6.94278
C76332	0.357734	4.93367	23.1869	2.63e-06	1.29e-05	5.13583
Mrpl40	0.357968	8.49078	7.68099	0.000581839	0.000842437	-1.25486
Tysnd1	0.358562	9.00649	7.49592	0.000652191	0.000931641	-1.38976
Casp9	0.358588	7.24437	10.4697	0.000132799	0.000233528	0.495377
Ggnbp2	0.358919	5.91994	3.27705	0.0218509	0.0252491	-5.47307
Rlbp1	0.359274	6.70751	7.5445	0.000632792	0.000906597	-1.35408
Pon3	0.35928	6.71323	10.1579	0.000153694	0.000264053	0.322027
Sva	0.359585	6.0878	15.9518	1.69e-05	4.67e-05	2.94199
Rnaseh2a	0.359723	7.68308	7.25185	0.000761002	0.00107045	-1.57201
Tspan3	0.361148	7.2924	3.07224	0.0275163	0.0315618	-5.73235
Hmgn1	0.36118	11.3972	5.45268	0.00277286	0.00354963	-3.09261
Nabp1	0.361297	7.48326	0.932368	0.393724	0.410642	-8.43595
Rnpep	0.361639	8.03663	12.8581	4.88e-05	0.000104638	1.68317
Atf2	0.361651	6.91059	7.63832	0.000597227	0.000862289	-1.28572
Mog	0.36204	5.71034	3.42017	0.0186736	0.0217618	-5.29531
Acads	0.362298	9.64282	4.21558	0.0082641	0.00996849	-4.36234
Dab2ip	0.362761	8.33433	19.6286	6.04e-06	2.26e-05	4.15857
Gpr33	0.362958	7.2447	8.53075	0.000354622	0.000542202	-0.669014
Zbtb14	0.362966	5.73777	17.8607	9.65e-06	3.11e-05	3.60467
Csde1	0.364322	11.5885	5.79611	0.00211518	0.00274954	-2.77541
Nbn	0.364345	7.0323	4.20662	0.00833594	0.0100496	-4.37232
Rsad2	0.364398	7.09127	2.90992	0.0331878	0.0377597	-5.94165
Atp8a1	0.364403	7.52822	21.5041	3.83e-06	1.66e-05	4.69406
Uhmk1	0.364455	7.716	7.5869	0.000616417	0.000886772	-1.3231
Slc30a9	0.364506	8.64477	4.75617	0.00500546	0.00620217	-3.78159
Mgp	0.365302	10.8716	2.26397	0.0727005	0.08027	-6.79886
Ndufaf1	0.365367	7.93846	3.49903	0.0171487	0.0200516	-5.19862
Serbp1	0.365485	7.3404	6.97784	0.000909789	0.00125469	-1.78276
Pick1	0.365486	7.77128	11.2439	9.4e-05	0.000175161	0.905971
Pagr1a	0.365756	8.59568	5.80286	0.00210422	0.00273612	-2.76932
Myh7	0.365878	10.5255	2.17373	0.0814615	0.0896262	-6.92009
C1ra	0.365992	8.6885	6.22634	0.00153282	0.00203491	-2.3972
Ifna2	0.366511	7.41954	3.33474	0.0205018	0.0237688	-5.40107
Rad23a	0.366661	8.84497	5.55081	0.00256309	0.00329793	-3.00052
Sptlc1	0.366741	8.9858	3.70066	0.0138539	0.0163456	-4.95555
Pde9a	0.366764	6.40508	4.20498	0.0083492	0.0100642	-4.37416
Rgn	0.367069	5.48362	16.633	1.37e-05	4.02e-05	3.18702
Asxl1	0.367121	8.39037	11.5542	8.23e-05	0.000157651	1.06318
Ermp1	0.367186	7.24202	5.7663	0.0021644	0.00280976	-2.80239
Sh3glb1	0.367326	8.14025	7.64313	0.000595469	0.000860034	-1.28223
Psmd12	0.367588	9.3486	2.43833	0.0585053	0.0651733	-6.5649
Mlf2	0.367665	10.4951	10.6474	0.000122411	0.000217846	0.592025
Vamp2	0.367861	8.44735	4.87292	0.00451482	0.00562454	-3.66159
Pigs	0.367976	8.88095	8.89605	0.000290475	0.000454055	-0.432668
Plrg1	0.368277	8.36457	3.82759	0.0121519	0.014433	-4.80563
Btbd1	0.368303	8.15506	6.83491	0.00100097	0.00136899	-1.89541
Prpf6	0.368396	9.78269	3.02787	0.0289505	0.0330809	-5.78923
Prrx1	0.368449	6.75256	4.18181	0.00853865	0.0102795	-4.40003
Adipoq	0.369113	5.94261	4.62712	0.0056216	0.00691463	-3.91643
Rfc1	0.369424	7.60914	9.01759	0.000272258	0.000428647	-0.355926
Adam22	0.369501	5.04531	9.63597	0.000198144	0.000326895	0.0207406
Podxl	0.370035	8.3459	7.37608	0.000703139	0.000996922	-1.47862
Tia1	0.370386	7.4117	10.6573	0.000121857	0.000216993	0.597404
1190002N15Rik	0.370852	9.75109	1.76428	0.137642	0.148704	-7.46455
Tpmt	0.371051	6.89963	4.16027	0.00871921	0.0104813	-4.42416
Taf15	0.371666	6.90232	5.20065	0.00341061	0.00431657	-3.3346
Vipr2	0.371767	7.48431	5.49199	0.00268649	0.00344505	-3.05558
Cycs	0.371844	10.654	3.96006	0.0106262	0.0126847	-4.65175
Prpf38a	0.372246	7.88345	18.5858	7.92e-06	2.71e-05	3.83816
Fkbp9	0.372313	9.61481	3.81732	0.0122804	0.0145777	-4.81767
Myo6	0.372598	7.17552	8.37473	0.00038707	0.000586071	-0.772677
Mecr	0.373412	7.71789	18.3376	8.47e-06	2.85e-05	3.75929
Dhrs7b	0.373608	7.32487	10.3223	0.000142226	0.000247658	0.414017
Ldhb	0.373647	8.15243	5.72067	0.00224236	0.00290623	-2.84389
Zbtb25	0.373708	5.73444	4.87402	0.0045105	0.00561995	-3.66047
Psmd10	0.373805	6.56528	24.2285	2.12e-06	1.11e-05	5.39323
Tcf4	0.374253	9.20104	4.11164	0.00914335	0.0109715	-4.47889
Adam15	0.374364	8.95892	22.8122	2.86e-06	1.36e-05	5.04035
Nop10	0.374517	10.6391	5.90633	0.00194427	0.00253951	-2.67655
Snx12	0.374689	7.67469	5.6382	0.00239182	0.00309121	-2.91951
Ddah2	0.374702	9.54654	9.24277	0.000241971	0.000387526	-0.216158
Gaa	0.37512	9.28374	7.44289	0.000674178	0.000959597	-1.42893
Mlec	0.37567	6.37617	2.49132	0.0548085	0.0611643	-6.49402
Ndrg2	0.375728	10.9287	3.52922	0.0166029	0.0194514	-5.16185
Rprd1b	0.375816	7.34041	2.36544	0.064038	0.0710828	-6.66259
1810030O07Rik	0.375912	8.18988	7.03386	0.000876759	0.0012147	-1.73914
Art3	0.376189	11.1632	2.93894	0.0320846	0.0365284	-5.904
Dpysl4	0.376336	8.34072	4.8425	0.00463705	0.00577105	-3.69268
4933426M11Rik	0.376634	10.0553	7.729	0.000565083	0.000820761	-1.22032
Lsm7	0.377116	9.00528	9.93719	0.000170866	0.000288899	0.196391
Ebf3	0.37725	7.68797	12.3163	6.03e-05	0.000123283	1.4331
Eif4a2	0.377266	11.9145	3.35065	0.0201466	0.0233879	-5.38129
Ackr4	0.377546	8.19557	5.13735	0.0035968	0.00453715	-3.39664
Grsf1	0.377658	5.93804	5.94815	0.0018837	0.00246625	-2.6394
Tcte2	0.377669	6.48736	8.45828	0.000369274	0.000562538	-0.716956
Serinc3	0.377732	11.5694	5.29565	0.00315188	0.00401007	-3.24244
Tbrg4	0.377955	8.82756	4.28483	0.00773248	0.00935693	-4.28558
Ercc3	0.378068	6.90149	2.69462	0.0428199	0.0482663	-6.2238
Tug1	0.378304	8.58152	8.10835	0.000451005	0.000671016	-0.953611
Eif2ak1	0.378401	8.66633	7.13188	0.000822302	0.00114653	-1.66346
Man1b1	0.378403	7.55895	6.38654	0.0013658	0.00182678	-2.26148
Myo5b	0.378792	7.97035	11.6626	7.86e-05	0.000152075	1.11716
Dgcr6	0.379561	8.74288	7.28908	0.000743089	0.00104846	-1.54388
Scp2	0.37965	10.4083	4.68099	0.00535424	0.00660531	-3.85985
Fam162a	0.379759	10.2004	2.53781	0.0517742	0.0578743	-6.43197
Slc44a2	0.380439	8.46095	3.77587	0.0128147	0.0151728	-4.86642
Galnt10	0.3806	6.92157	12.9683	4.68e-05	0.000101422	1.73279
D3Ertd246e	0.381176	4.98993	5.7607	0.00217379	0.00282112	-2.80747
Ntsr2	0.381284	8.39406	5.46622	0.00274275	0.00351307	-3.07983
Idh3a	0.381548	7.09104	3.47163	0.0176619	0.0206185	-5.23211
D030029J20Rik	0.381563	8.42053	19.3955	6.41e-06	2.36e-05	4.08846
Zfand6	0.381572	10.2918	2.81061	0.0372945	0.0422233	-6.0712
9430016H08Rik	0.382283	8.27298	4.35363	0.00724305	0.00880125	-4.21002
Alpl	0.382629	8.82182	10.0358	0.000162924	0.00027724	0.252848
Zmiz2	0.382747	8.95623	18.6255	7.84e-06	2.7e-05	3.85068
Zfp932	0.382894	5.258	1.7432	0.141441	0.152675	-7.49204
Crebbp	0.382922	8.96504	9.50235	0.000211888	0.000346458	-0.0587736
Psmd6	0.383031	10.5194	3.05628	0.0280228	0.032088	-5.75278
Nisch	0.38305	10.3765	2.8622	0.0350946	0.0398566	-6.00376
Ndufs3	0.383172	12.3962	5.31773	0.00309508	0.00394009	-3.22118
Rbpms	0.383269	10.928	8.93189	0.000284957	0.000446388	-0.409942
Etaa1	0.383435	4.95839	12.0989	6.57e-05	0.000132111	1.32982
Ccz1	0.383609	8.25875	4.47588	0.00645914	0.0078941	-4.07745
Stim1	0.383674	8.67941	13.4486	3.92e-05	8.83e-05	1.94452
Zfp942	0.383896	6.06217	11.8239	7.35e-05	0.000144395	1.19664
Glod4	0.384411	7.75857	12.4387	5.74e-05	0.000118658	1.4905
Rnasek	0.384496	9.19925	18.3551	8.43e-06	2.85e-05	3.76488
Snx3	0.384611	12.1603	4.63568	0.00557809	0.00686498	-3.90741
D18Ertd232e	0.384871	8.574	3.1796	0.024364	0.0280546	-5.59574
Pds5b	0.384979	5.82573	10.4707	0.00013274	0.000233471	0.495903
Rnaseh2b	0.385105	7.09592	13.9069	3.32e-05	7.81e-05	2.13988
Ppdpf	0.38512	9.99978	9.01832	0.000272154	0.00042856	-0.355473
Rhd	0.385567	8.24364	3.34299	0.0203167	0.023576	-5.39081
AU021092	0.386204	7.34694	6.88842	0.000965625	0.00132521	-1.85302
Dnajc7	0.386519	9.64985	3.90688	0.0112107	0.0133495	-4.71321
Maged1	0.386715	9.71957	5.16087	0.00352627	0.00445525	-3.37353
Tpd52l2	0.38683	7.21334	3.27401	0.0219249	0.0253278	-5.47688
Mrap	0.386983	7.96351	21.103	4.21e-06	1.77e-05	4.58361
2810025M15Rik	0.386994	9.27688	5.49826	0.00267302	0.00343019	-3.04969
Gas1	0.387465	9.11018	1.89187	0.116764	0.126838	-7.29667
Cenpv	0.387567	7.08512	9.14788	0.000254219	0.000404399	-0.274683
Casq2	0.387585	9.61601	11.5693	8.18e-05	0.000156942	1.07074
Smagp	0.387696	8.21496	7.25063	0.000761597	0.00107094	-1.57293
Uhrf1bp1	0.387755	8.35032	7.4352	0.000677439	0.000963146	-1.43464
Psmc3ip	0.387796	7.03778	9.3071	0.000234067	0.000376732	-0.176792
Cd36	0.387873	6.70688	6.66259	0.00112564	0.00152802	-2.03376
Ide	0.388256	7.66868	9.32013	0.000232503	0.000374491	-0.168846
Myl9	0.388292	8.54485	2.85836	0.0352536	0.0400164	-6.00878
Rpgr	0.388347	4.52845	4.7504	0.00503125	0.00623236	-3.78756
Taf11	0.388371	8.7002	23.2893	2.58e-06	1.28e-05	5.16165
2700089E24Rik	0.388513	6.50747	5.08255	0.00376765	0.00473285	-3.45079
Fkbpl	0.388661	7.65381	23.6868	2.37e-06	1.2e-05	5.2608
Ifi35	0.388911	8.23276	2.73823	0.0406431	0.0458896	-6.16628
Cops6	0.389126	10.9978	4.77242	0.00493357	0.00612091	-3.76477
Ppid	0.389182	8.72288	4.28569	0.0077261	0.00935051	-4.28463
Sntb1	0.389225	5.74271	8.4169	0.000377964	0.000573775	-0.744493
Ahrr	0.390085	5.71862	5.44455	0.00279112	0.0035724	-3.10029
Derl2	0.390203	5.39833	3.62954	0.0149258	0.017551	-5.04059
Pld3	0.390537	8.56204	6.44792	0.00130755	0.00175397	-2.21018
Erbb4	0.390695	6.88081	6.06864	0.00172122	0.00226711	-2.53345
Dnajc10	0.391382	9.5764	24.4303	2.03e-06	1.08e-05	5.44178
Sgcd	0.391611	6.71935	17.8146	9.77e-06	3.14e-05	3.58949
Rras	0.391641	9.55096	3.14099	0.0254483	0.029255	-5.64469
Ube2m	0.391668	9.16634	7.57683	0.000620263	0.000891527	-1.33045
Bmp6	0.391745	7.44397	4.95336	0.00420932	0.00525969	-3.58
Lrrc6	0.391836	4.86411	17.8717	9.62e-06	3.1e-05	3.60828
Hnrnpll	0.392068	8.71268	8.21217	0.000424696	0.00063719	-0.882485
Fgf9	0.392506	6.07806	10.9699	0.00010592	0.000193342	0.763726
Snrk	0.392893	9.24803	2.17003	0.0818435	0.0900123	-6.92505
Wdr81	0.392901	9.53269	14.1782	3.02e-05	7.27e-05	2.25263
Jkamp	0.392936	9.05159	7.1578	0.000808578	0.00112937	-1.6436
Abhd16a	0.393009	10.4582	14.1186	3.08e-05	7.38e-05	2.22805
Fam69b	0.39305	8.49476	4.34094	0.00733058	0.00890513	-4.2239
Ggt5	0.393084	7.40015	7.96152	0.000491588	0.000725467	-1.05555
Tab3	0.393639	6.73636	16.5953	1.39e-05	4.05e-05	3.1737
Etnk1	0.393644	7.74346	6.63205	0.00114961	0.00155693	-2.05859
Camk2a	0.393776	6.44374	5.49811	0.00267334	0.00343019	-3.04983
Auh	0.393777	9.0399	4.71752	0.00518134	0.0064101	-3.82172
Msc	0.393932	7.41099	9.27164	0.000238385	0.000382835	-0.198459
Tmem9b	0.394116	8.90195	6.4156	0.00133784	0.00179103	-2.23714
Ugt8a	0.394401	5.11718	4.60121	0.00575568	0.00706463	-3.94378
Tm2d3	0.394758	8.27586	4.29104	0.00768679	0.00930551	-4.27874
C2cd2	0.394896	8.07502	20.7437	4.59e-06	1.87e-05	4.48285
Neurl4	0.395099	8.67429	6.96977	0.000914671	0.00126083	-1.78908
Mrpl35	0.395141	9.47105	3.50194	0.0170953	0.0199945	-5.19507
Atraid	0.395186	9.67712	7.57188	0.00062216	0.000893859	-1.33406
Lum	0.395203	9.70632	1.3913	0.222565	0.236706	-7.93509
Fuca1	0.395234	7.55251	5.11279	0.00367224	0.00462297	-3.42087
H2-Aa	0.395617	9.78239	5.40546	0.00288092	0.00368141	-3.13734
Aqp7	0.395855	7.73445	10.267	0.000145967	0.000252867	0.383215
Actc1	0.396108	13.3948	8.89042	0.000291353	0.000454962	-0.436243
Rpa2	0.396153	7.32866	13.0651	4.51e-05	9.88e-05	1.77607
Ncoa4	0.39624	6.75282	7.12587	0.000825523	0.00115028	-1.66808
Strn3	0.396496	10.1206	2.41667	0.0600933	0.0668485	-6.59391
Efnb1	0.396936	8.39912	4.67666	0.00537517	0.00662645	-3.86439
Mpv17	0.397048	8.57762	5.04333	0.00389577	0.00488607	-3.48979
Acvrl1	0.397135	8.73627	11.5162	8.36e-05	0.00015969	1.04415
Hrsp12	0.397291	4.79359	13.1383	4.39e-05	9.67e-05	1.80861
Ube4b	0.397324	8.52649	25.4486	1.66e-06	9.44e-06	5.68068
Scmh1	0.397773	8.81973	5.64518	0.00237872	0.00307519	-2.91308
Itgb1bp1	0.397851	8.45013	7.26396	0.000755121	0.00106355	-1.56285
Rdh13	0.397978	7.98291	16.4998	1.43e-05	4.15e-05	3.13987
Pgrmc2	0.398618	6.32478	11.1668	9.72e-05	0.000179662	0.866278
Mrps14	0.39862	9.70168	4.33293	0.00738642	0.00896798	-4.23268
Ppp2r5a	0.398622	10.2232	5.18159	0.00346548	0.00438289	-3.35323
Coil	0.398839	6.75756	17.9848	9.32e-06	3.05e-05	3.64528
Pcnt	0.398879	7.84676	12.7123	5.16e-05	0.000109202	1.61688
Ddx17	0.39926	9.01859	1.76015	0.138379	0.149463	-7.46995
Lrp1	0.399286	9.92578	7.90617	0.000507999	0.000746409	-1.09439
Limd2	0.399768	4.37031	4.06596	0.00956358	0.0114585	-4.53062
Clic3	0.400179	7.48486	10.4117	0.000136417	0.000238832	0.463491
Zfp740	0.400228	8.49282	25.9412	1.5e-06	8.86e-06	5.79273
Nvl	0.40033	6.07829	7.32782	0.000724977	0.00102589	-1.51474
Syt9	0.400517	5.58586	4.7343	0.00510411	0.00631903	-3.80427
Cd320	0.400586	8.78202	8.32863	0.000397323	0.00060014	-0.803628
Sel1l	0.400746	7.29559	2.00092	0.10151	0.110889	-7.15161
Cd28	0.400759	6.11713	8.4913	0.00036251	0.000553585	-0.695065
Tprgl	0.40092	9.8371	5.34486	0.00302692	0.00385782	-3.19515
Banp	0.400969	8.8398	13.5735	3.74e-05	8.52e-05	1.99838
Spryd4	0.401189	9.53671	6.20812	0.0015533	0.0020596	-2.4128
Tmem37	0.401193	7.18351	5.52016	0.00262654	0.0033756	-3.02916
Cst3	0.401194	10.2809	8.63425	0.000334873	0.000514981	-0.601157
Aup1	0.401596	9.98183	6.15277	0.00161753	0.00213891	-2.46043
Eif4ebp2	0.401719	8.82377	7.10978	0.000834221	0.00116092	-1.68045
Med12l	0.4021	5.92281	3.27724	0.0218464	0.0252471	-5.47283
Capn3	0.402252	6.21336	9.10678	0.000259752	0.000411851	-0.3002
Sh3bp5	0.40245	7.45697	4.33854	0.00734726	0.00892415	-4.22653
Rab3d	0.402472	7.91188	16.9028	1.27e-05	3.8e-05	3.28133
Slc34a1	0.402473	6.10905	7.6675	0.000586652	0.000848984	-1.2646
Nedd4	0.402491	6.91446	6.5979	0.00117712	0.00159221	-2.08644
Notch3	0.40283	8.75677	22.2899	3.21e-06	1.48e-05	4.90457
Casq1	0.403017	10.6769	1.8818	0.118287	0.128413	-7.31
Dcn	0.403544	12.8835	7.80904	0.000538399	0.000786317	-1.16312
Lman2	0.40355	8.09968	3.55126	0.0162167	0.019028	-5.13508
Kdm6a	0.403583	8.09182	9.65605	0.000196171	0.000324096	0.0326076
Serac1	0.403702	6.85977	12.4733	5.66e-05	0.000117287	1.50666
Dmap1	0.403753	8.19333	10.1167	0.000156733	0.000268431	0.298795
Rgl1	0.404025	5.48564	12.5691	5.46e-05	0.000113941	1.55105
Serpinb9	0.404525	8.28225	15.5022	1.94e-05	5.19e-05	2.77457
Zfp358	0.404905	9.55577	4.89321	0.00443539	0.00552874	-3.64093
Ceacam9	0.405009	4.80492	5.70774	0.00226505	0.00293346	-2.85569
Psmg4	0.405049	9.25616	26.1369	1.45e-06	8.67e-06	5.83664
Nfic	0.405586	8.96554	5.56451	0.00253532	0.0032646	-2.98777
Kcna7	0.406268	6.77456	7.20106	0.000786272	0.00110253	-1.61058
Lhx8	0.406423	5.37392	14.0623	3.14e-05	7.49e-05	2.20474
Aip	0.406686	9.09595	6.66857	0.00112102	0.00152198	-2.02891
Xpo1	0.406856	6.30875	3.66279	0.0144133	0.0169666	-5.00074
Fkbp7	0.407017	7.3994	4.80189	0.00480626	0.00596889	-3.73437
Orc5	0.407349	6.357	11.2877	9.22e-05	0.000172356	0.928423
Pias3	0.4076	6.52876	5.28128	0.00318949	0.00404967	-3.2563
Rom1	0.407705	5.97594	3.43957	0.0182848	0.0213201	-5.27145
Gpr125	0.407895	4.78101	15.8886	1.72e-05	4.75e-05	2.91871
Wtap	0.407964	6.9946	2.83032	0.0364366	0.0413002	-6.0454
Prkca	0.407967	7.95932	4.09005	0.0093393	0.0112005	-4.5033
Adam17	0.408046	7.51814	5.44374	0.00279294	0.00357421	-3.10105
Aatk	0.408339	8.15113	6.0942	0.00168891	0.00222724	-2.51118
Snta1	0.408636	9.60888	4.97352	0.00413657	0.00517397	-3.55969
Serinc1	0.409016	8.23787	5.95331	0.00187639	0.00245742	-2.63483
Zfp617	0.409147	6.59394	1.81767	0.128477	0.139129	-7.39459
Ptrh2	0.410025	8.50722	9.82264	0.000180677	0.000302618	0.130173
AI118078	0.410381	7.29909	4.19298	0.00844667	0.0101719	-4.38754
Atp1b2	0.410866	6.60055	2.46089	0.0568993	0.0634328	-6.53471
Fbxw5	0.41116	7.38954	12.1144	6.53e-05	0.000131525	1.33728
Ilvbl	0.411256	7.53399	7.02163	0.000883849	0.00122239	-1.74864
Myoc	0.411514	6.79613	3.78226	0.0127306	0.0150834	-4.85889
Rabggta	0.411516	8.98298	23.7156	2.35e-06	1.2e-05	5.26792
Usp9x	0.411619	8.25291	10.149	0.000154344	0.000265015	0.317016
Naa60	0.411645	9.38032	6.50924	0.00125227	0.00168421	-2.15932
Eif5b	0.411855	8.27952	4.67692	0.0053739	0.00662581	-3.86411
Pycrl	0.412261	7.97425	10.4276	0.000135416	0.000237414	0.472222
Topbp1	0.412431	6.28122	25.8064	1.54e-06	8.99e-06	5.7623
Casp1	0.412998	5.95219	12.4019	5.83e-05	0.000120047	1.47332
Fbp1	0.413002	6.77975	5.86455	0.00200708	0.00261642	-2.71387
Dmd	0.413035	7.05453	4.8223	0.00472036	0.00586972	-3.71339
Ccni	0.413236	7.08051	8.22376	0.000421874	0.000633282	-0.874595
Taf1c	0.413348	7.5335	21.0524	4.26e-06	1.79e-05	4.56951
Ube2v1	0.413387	10.0167	6.19113	0.00157269	0.00208309	-2.42739
Nov	0.413574	7.53015	2.1524	0.0836921	0.0919761	-6.94873
Dld	0.413806	11.23	2.85761	0.0352845	0.0400463	-6.00975
Bag3	0.413971	10.8693	3.3378	0.020433	0.0237015	-5.39726
Mstn	0.414352	5.1434	11.1792	9.66e-05	0.000178889	0.87265
Inpp5a	0.414524	11.2414	4.75014	0.00503244	0.00623295	-3.78784
Bbs9	0.414806	7.39933	11.6783	7.81e-05	0.000151359	1.12499
Chchd6	0.414832	7.94498	8.55201	0.000350454	0.000536864	-0.655016
Cul3	0.415218	10.0195	3.71945	0.0135855	0.0160398	-4.9332
Tapbp	0.415592	9.01493	9.03406	0.000269896	0.000425311	-0.345599
Nono	0.416477	8.2324	2.19501	0.079298	0.0873227	-6.8915
Cd72	0.416481	4.63188	3.36678	0.0197935	0.0229994	-5.36128
Ubxn1	0.416501	8.07505	4.04516	0.00976228	0.0116917	-4.55428
Laptm4a	0.416666	12.4463	12.6904	5.21e-05	0.000109856	1.60687
Hnf4g	0.416896	5.12967	27.0215	1.23e-06	7.82e-06	6.031
[truncated: 6,739 more rows]
