# Supplementary material for: Identification of Differentially Expressed Genes and Signaling Pathways in Acute Myocardial Infarction Based on Integrated Bioinformatics Analysis
Source: Cardiovasc Ther. 2019 Aug 1;2019:8490707. doi: 10.1155/2019/8490707 (PMC6739802; doi:10.1155/2019/8490707)
Supplement: Supplementary Materials — A PPI network: there were 56 nodes and 240 edges in this network, including 2 down- and 54 upregulated genes (see the supplementary document). [file 8490707.f1.zip › DEGs, GSE775, GSE19322, and GSE97494/GSE19322, DEGs.xlsx]

## Sheet: GSE19322
Gene	logFC	AveExpr	t	P.Value	adj.P.Val	B
Cacnb2	-2.71247	5.42069	-8.048	1.79e-05	0.000317613	3.32846
Synpo2	-2.42716	7.85851	-4.18373	0.00222172	0.00626924	-1.71954
Gm3579	-2.34875	7.5818	-3.87939	0.0035412	0.00891828	-2.20379
Kif13a	-2.27131	6.77541	-8.84426	8.17e-06	0.000221653	4.13726
Klhl24	-2.25493	5.96136	-8.88609	7.85e-06	0.000217722	4.17796
Nebl	-2.22219	5.21419	-7.4831	3.23e-05	0.000420363	2.71267
Myh6	-2.21898	10.2067	-3.6245	0.00528192	0.0122369	-2.61709
Ralgapa1	-2.15315	6.46946	-6.40763	0.000109635	0.000822135	1.43284
Kcnj11	-2.0975	6.27774	-11.2953	1.01e-06	0.000111062	6.26159
Pkia	-2.07467	7.00776	-6.52995	9.47e-05	0.000756495	1.58597
Myl7	-2.05366	6.4289	-9.92166	3.09e-06	0.000160182	5.13318
Hand2	-2.04235	5.61428	-16.9348	2.8e-08	4.68e-05	9.70575
Ttc30b	-1.96357	5.25985	-8.53669	1.1e-05	0.000249464	3.83266
Ryr2	-1.96095	8.8207	-4.76596	0.000944408	0.00331851	-0.826195
Scn5a	-1.93823	7.30461	-4.51168	0.001364	0.00428029	-1.21068
Prkar2a	-1.89198	6.32778	-5.14606	0.000554731	0.00226284	-0.268609
Dusp18	-1.85321	6.40626	-6.63037	8.41e-05	0.000703808	1.71018
Epas1	-1.83489	7.77899	-4.68395	0.0010622	0.00360084	-0.949212
Slc2a4	-1.82915	8.82987	-3.82136	0.0038759	0.00955786	-2.29733
Il6st	-1.81232	6.93811	-9.71637	3.7e-06	0.000169718	4.95149
Asb14	-1.78113	5.47204	-5.61778	0.000294966	0.00149029	0.394227
Pcmtd1	-1.77735	6.67793	-10.4897	1.92e-06	0.000132932	5.61761
Arl10	-1.74936	5.31533	-18.485	1.27e-08	4.15e-05	10.4125
Gbp6	-1.71448	4.91804	-5.3518	0.000419534	0.00186637	0.024458
Trim35	-1.69244	6.78452	-5.59469	0.000304007	0.00151841	0.362532
Kremen1	-1.68754	6.45851	-7.41306	3.48e-05	0.000431772	2.63372
Rab18	-1.68687	7.607	-4.72487	0.00100157	0.00346278	-0.88771
Prss21	-1.68207	4.83785	-18.3746	1.34e-08	4.15e-05	10.3648
Kcnk3	-1.65162	7.65304	-9.16647	6.05e-06	0.000196424	4.44636
Myl4	-1.64922	6.0995	-13.9478	1.59e-07	5.69e-05	8.08206
Myot	-1.64495	8.21297	-4.29781	0.0018717	0.00548068	-1.54094
Pik3r1	-1.63888	6.34173	-6.60921	8.63e-05	0.00071285	1.68412
Ctnnb1	-1.62299	8.47165	-4.21824	0.00210902	0.00601235	-1.66533
Prox1	-1.6147	5.6926	-11.3597	9.64e-07	0.000111062	6.31108
Gpam	-1.60629	8.08434	-6.8962	6.18e-05	0.000593364	2.03258
Echs1	-1.60112	10.2001	-4.08397	0.00258494	0.00698163	-1.87707
Col4a5	-1.59919	6.23582	-10.6149	1.73e-06	0.000131423	5.72088
Faf1	-1.59615	7.97721	-14.0042	1.53e-07	5.69e-05	8.11649
Ucp3	-1.58501	7.3578	-4.49709	0.00139348	0.00434979	-1.23302
Rab5b	-1.57351	5.51216	-12.1479	5.37e-07	8.65e-05	6.8934
Angpt1	-1.57323	5.49709	-16.1036	4.41e-08	4.68e-05	9.29146
Tmem38a	-1.56645	8.42776	-3.94664	0.00319114	0.00822885	-2.09587
Ltbp4	-1.56562	9.04697	-5.06401	0.000621157	0.00244417	-0.387215
Rbl2	-1.55081	5.68686	-5.91397	0.00020155	0.00116467	0.794
Acaa2	-1.54753	10.3697	-3.62896	0.00524471	0.0121685	-2.6098
Mrps23	-1.5458	7.82607	-5.24705	0.000483288	0.00205472	-0.123984
Aldh1a1	-1.54199	6.30965	-5.48624	0.000350668	0.00166435	0.212647
Prepl	-1.54122	7.91083	-6.54836	9.27e-05	0.000747021	1.60884
Mlf1	-1.53361	7.94559	-3.00751	0.0143246	0.0271746	-3.63684
Ednra	-1.53088	5.9617	-6.72133	7.57e-05	0.000663556	1.82153
Kcnip2	-1.52683	5.41887	-8.14298	1.62e-05	0.000299849	3.42846
Acot1	-1.51978	5.82241	-5.65039	0.000282689	0.0014536	0.438854
Ttc7b	-1.51519	6.73944	-9.73436	3.64e-06	0.00016837	4.96755
St3gal4	-1.50207	6.5092	-7.41573	3.47e-05	0.000431512	2.63675
Ube2d1	-1.48898	6.60431	-9.04325	6.78e-06	0.000207698	4.32933
Coq9	-1.48708	10.2764	-6.32903	0.000120542	0.000867071	1.33339
Timp3	-1.47968	8.70779	-4.82476	0.000868595	0.00311358	-0.738575
Ppargc1a	-1.4654	6.70845	-3.72116	0.0045345	0.0108462	-2.45963
Txnip	-1.45907	10.272	-2.24981	0.050235	0.0779129	-4.88095
B4galt4	-1.45439	5.06055	-9.71314	3.71e-06	0.000169718	4.9486
Psmg2	-1.44531	6.18019	-9.94767	3.03e-06	0.000159254	5.15594
Rgs5	-1.44217	8.86825	-5.76574	0.000243503	0.00131236	0.595504
Hccs	-1.43202	7.90311	-5.21226	0.00050671	0.00211789	-0.173634
Ranbp9	-1.43193	6.88725	-3.32893	0.00847879	0.017826	-3.10322
Usp13	-1.43015	8.00804	-8.2497	1.46e-05	0.000283622	3.53965
Pla2g12a	-1.42455	7.20414	-3.87143	0.00358525	0.00900662	-2.2166
Got1	-1.42305	11.9906	-3.15027	0.011336	0.0225235	-3.39948
Fyco1	-1.42108	9.07951	-5.50071	0.000344019	0.00164243	0.232741
Opa1	-1.416	5.86939	-5.82639	0.000225292	0.00124793	0.677102
Tsc2	-1.41597	8.30281	-4.20888	0.002139	0.00608188	-1.68003
Akr1c6	-1.4134	5.27444	-14.0197	1.52e-07	5.69e-05	8.12593
Ppp1r3c	-1.41151	7.64184	-5.18892	0.00052311	0.00216477	-0.207048
Tgfbr3	-1.41133	7.19492	-4.49491	0.00139794	0.00436059	-1.23636
Immt	-1.41077	9.00059	-4.29442	0.0018812	0.00550415	-1.54622
Slc40a1	-1.40398	7.16905	-4.6407	0.00113057	0.00375264	-1.01446
Ccng1	-1.40356	9.33055	-3.93233	0.00326244	0.00835296	-2.11879
Ogn	-1.39365	7.22933	-6.53836	9.38e-05	0.000752212	1.59642
Fbxo32	-1.39249	7.5127	-3.55909	0.00586023	0.0132935	-2.72412
Dnmt3l	-1.39218	6.30177	-22.121	2.5e-09	3.26e-05	11.7925
Hoxa5	-1.38896	4.97949	-13.5569	2.04e-07	6.08e-05	7.83918
Phkb	-1.3887	6.41324	-6.92872	5.96e-05	0.000579	2.07139
Cul3	-1.38865	7.13649	-5.26161	0.000473835	0.00202841	-0.103259
Efcab2	-1.3882	5.57986	-6.88376	6.27e-05	0.000597866	2.01769
Irs1	-1.38521	7.94244	-4.98248	0.000695697	0.00264694	-0.506022
Slc8a1	-1.38497	5.50421	-10.6272	1.72e-06	0.000131423	5.73099
Fbxl15	-1.38217	6.36903	-18.6991	1.15e-08	4.15e-05	10.504
Hc	-1.3801	5.87001	-10.1588	2.53e-06	0.000147261	5.33865
Dhrs4	-1.37941	7.8088	-5.84466	0.000220099	0.00122729	0.701582
Atg2a	-1.37936	7.33683	-13.1148	2.74e-07	6.38e-05	7.55463
Ptp4a3	-1.37935	8.12199	-9.33291	5.2e-06	0.000187656	4.60215
Pdha1	-1.37123	11.3028	-3.78922	0.00407541	0.00994066	-2.34927
Usp15	-1.36821	7.05708	-4.5263	0.00133513	0.00421891	-1.18833
Nr1d2	-1.36315	6.53988	-7.85163	2.18e-05	0.000351049	3.11853
Ctsf	-1.36069	7.26614	-5.06941	0.000616527	0.00243327	-0.379372
Ppapdc3	-1.35997	6.04894	-9.54054	4.32e-06	0.000178623	4.79294
Psme4	-1.35996	9.37442	-4.00096	0.00293511	0.0077057	-2.00907
Hsdl2	-1.35946	7.98321	-3.86721	0.00360886	0.00905373	-2.22341
Fuom	-1.35912	7.31978	-12.6617	3.73e-07	7.49e-05	7.25173
Fgf13	-1.35258	7.12678	-8.36542	1.3e-05	0.000266704	3.65884
Kcnj5	-1.3413	4.85843	-13.7903	1.76e-07	5.7e-05	7.98514
Nampt	-1.33899	7.25863	-4.85093	0.00083698	0.00303359	-0.699743
Dnttip2	-1.3381	6.68601	-3.90957	0.00337933	0.00858351	-2.1553
Cpn1	-1.3367	4.85751	-16.3344	3.88e-08	4.68e-05	9.40916
Clpx	-1.33628	7.79799	-4.16936	0.00227053	0.00636979	-1.74216
Timp4	-1.33571	7.27906	-3.86114	0.00364305	0.00911146	-2.23317
Klra5	-1.33366	5.39558	-10.5878	1.77e-06	0.000131423	5.69865
LOC102643033	-1.33336	4.409	-6.75921	7.24e-05	0.000651543	1.86759
Fuca1	-1.32917	6.18507	-11.3352	9.82e-07	0.000111062	6.29229
Psmd12	-1.32545	9.21471	-9.87447	3.22e-06	0.000160764	5.09174
Scn4a	-1.32083	5.28237	-14.5619	1.08e-07	5.69e-05	8.44819
2900097C17Rik	-1.3199	7.74731	-6.28928	0.000126502	0.00088599	1.28276
Gcdh	-1.31804	6.59848	-10.3269	2.2e-06	0.000139785	5.48148
Phka1	-1.31711	7.44103	-4.26563	0.00196406	0.00569364	-1.59114
1700001G17Rik	-1.31652	5.77445	-14.4558	1.16e-07	5.69e-05	8.38624
Acsl1	-1.31495	9.20897	-4.21535	0.00211824	0.00603468	-1.66988
Spop	-1.31364	8.49833	-6.39514	0.000111293	0.000827436	1.4171
Enpp5	-1.31288	5.27662	-7.8007	2.3e-05	0.000358286	3.06338
Cidea	-1.31153	8.07206	-4.23331	0.00206174	0.00590726	-1.64172
Lpcat3	-1.31097	8.72608	-6.77109	7.14e-05	0.000646502	1.88199
Gys1	-1.30967	7.89383	-8.21004	1.52e-05	0.000288649	3.49847
Herpud1	-1.30941	8.67351	-5.46531	0.000360537	0.00169049	0.183513
Isca1	-1.30921	9.0204	-4.54847	0.00129259	0.0041296	-1.15449
Csdc2	-1.30631	7.60113	-4.65436	0.00110849	0.00369751	-0.993833
Dsc2	-1.30412	5.51847	-8.35124	1.32e-05	0.000267201	3.64432
Gpcpd1	-1.30378	8.85564	-2.41395	0.0382833	0.0616084	-4.61667
Slc5a4a	-1.3029	5.26916	-13.5418	2.06e-07	6.08e-05	7.82963
Prl3a1	-1.30175	4.4555	-10.2839	2.28e-06	0.000141447	5.4451
Coro6	-1.29991	7.4482	-7.77423	2.37e-05	0.000362904	3.0346
Bcat2	-1.29774	6.89858	-5.89826	0.000205599	0.00117971	0.773121
Ubr3	-1.29682	6.96604	-7.88871	2.1e-05	0.000343873	3.1585
Echdc1	-1.29582	5.40914	-9.89289	3.17e-06	0.000160764	5.10793
Olfr672	-1.2957	5.7139	-14.0437	1.49e-07	5.69e-05	8.14051
Dnah1	-1.29493	5.34693	-14.9663	8.48e-08	5.57e-05	8.67948
Hcn1	-1.29048	5.19754	-9.41475	4.83e-06	0.000182963	4.67782
Chst10	-1.28528	5.1966	-10.4236	2.03e-06	0.000132932	5.5626
Exoc8	-1.28043	6.21841	-6.34142	0.000118747	0.000859828	1.34912
Zfp521	-1.27807	5.24	-14.7968	9.39e-08	5.57e-05	8.58347
Stom	-1.27484	7.03275	-4.59066	0.00121559	0.00395143	-1.09029
Pln	-1.2742	12.1877	-2.85584	0.018395	0.0332942	-3.88902
Dgat2	-1.27195	9.62841	-3.64644	0.00510166	0.0118954	-2.58128
Myl9	-1.27009	7.04513	-4.11036	0.00248312	0.00679569	-1.83528
Slc25a11	-1.26902	10.3244	-3.0647	0.0130405	0.025178	-3.54173
Cga	-1.26759	4.86119	-13.2436	2.51e-07	6.23e-05	7.63864
Psap	-1.26656	10.7961	-3.41387	0.0073934	0.0159796	-2.96291
Mpv17	-1.26642	6.05576	-8.17072	1.58e-05	0.000296388	3.45748
Asb15	-1.26246	4.89291	-13.2552	2.49e-07	6.23e-05	7.64616
Trmt5	-1.26142	7.32061	-5.03034	0.000650842	0.00252593	-0.43616
Dnah5	-1.25884	4.82589	-9.63326	3.98e-06	0.000173423	4.87688
Acot2	-1.25871	6.07594	-7.79981	2.31e-05	0.000358286	3.06241
Jph1	-1.25429	6.56393	-10.5451	1.84e-06	0.000132285	5.6635
Bre	-1.25368	6.68469	-7.83805	2.22e-05	0.000353022	3.10386
Mapk10	-1.25104	5.0178	-10.3786	2.1e-06	0.00013645	5.52494
Serinc1	-1.24715	8.19811	-3.51761	0.00626095	0.0140149	-2.79218
Mrpl45	-1.24421	7.25251	-13.4051	2.26e-07	6.08e-05	7.74271
Amd1	-1.24132	8.21893	-4.56448	0.00126279	0.00406536	-1.13011
Yipf7	-1.24028	8.95547	-6.0291	0.000174373	0.00106768	0.946025
Fbxl3	-1.2366	5.94102	-7.51258	3.13e-05	0.000412633	2.74571
Xcr1	-1.23653	4.90987	-9.26491	5.53e-06	0.000192123	4.53881
Mrpl18	-1.23635	6.41577	-6.55073	9.24e-05	0.000746308	1.61178
Ptgr2	-1.23575	6.00515	-4.60905	0.00118359	0.00388026	-1.06239
Plcb4	-1.23574	6.868	-5.00864	0.000670781	0.00257569	-0.467793
Etfdh	-1.23572	10.3241	-4.09812	0.00252979	0.00687955	-1.85465
Lsm10	-1.23474	7.04341	-6.09218	0.000161189	0.00101899	1.02853
Slc25a13	-1.2329	8.58149	-3.5431	0.00601142	0.0135751	-2.75034
AI314180	-1.23196	8.19966	-8.38544	1.27e-05	0.000264312	3.67932
Prkch	-1.2312	5.63887	-3.63756	0.00517378	0.0120313	-2.59576
Ebpl	-1.23116	6.83975	-12.1596	5.32e-07	8.65e-05	6.90175
Ly6i	-1.22973	5.40763	-11.8825	6.51e-07	9.52e-05	6.70193
Ccpg1	-1.2263	4.73431	-16.2435	4.08e-08	4.68e-05	9.36305
Fkbp4	-1.22585	8.32245	-3.51058	0.00633164	0.0141464	-2.80372
Snx29	-1.22517	6.10347	-13.2066	2.57e-07	6.23e-05	7.61462
Txlnb	-1.22444	8.77848	-3.40544	0.00749432	0.016171	-2.97681
Islr	-1.22177	6.27642	-4.42606	0.001547	0.00472094	-1.34217
Grb14	-1.22172	7.94521	-2.94126	0.0159754	0.0296476	-3.74702
AY074887	-1.22	5.14624	-7.82326	2.25e-05	0.000354514	3.08784
Pdlim3	-1.21943	6.63093	-3.92494	0.00329995	0.00843112	-2.13065
Cyp17a1	-1.21894	4.89342	-15.5581	6e-08	4.89e-05	9.0048
Ccng2	-1.21585	5.67817	-5.52775	0.000331955	0.00160718	0.27021
Cyp2b19	-1.21456	4.98721	-13.8388	1.7e-07	5.7e-05	8.01513
Zfp354c	-1.21371	5.34375	-10.8414	1.45e-06	0.000126546	5.90468
Got2	-1.2081	11.3481	-3.07876	0.0127433	0.0247248	-3.51834
Gab1	-1.20364	7.34767	-9.17047	6.03e-06	0.000196424	4.45012
Hnmt	-1.20204	4.16341	-8.39503	1.26e-05	0.000264312	3.68911
Fto	-1.20051	6.50253	-7.76876	2.38e-05	0.000363055	3.02864
Slmap	-1.19935	6.51418	-8.59872	1.03e-05	0.000243817	3.89487
Dnajc28	-1.19809	6.08507	-6.72525	7.53e-05	0.000662214	1.82631
Med14	-1.19591	5.43369	-9.08958	6.5e-06	0.000202975	4.3735
Mccc2	-1.19449	6.21732	-7.88655	2.11e-05	0.000344078	3.15618
Ankrd40	-1.19434	7.52779	-6.26206	0.000130768	0.000902309	1.24797
Otud6b	-1.19309	7.54061	-9.35011	5.12e-06	0.000187641	4.6181
Lrmp	-1.19305	4.69741	-18.0368	1.59e-08	4.15e-05	10.2164
Lin7c	-1.19265	6.01855	-6.91945	6.02e-05	0.000583408	2.06034
Calm4	-1.19232	5.40599	-14.2452	1.32e-07	5.69e-05	8.2617
Slc38a5	-1.1911	5.01524	-14.5514	1.09e-07	5.69e-05	8.4421
Aplp2	-1.19054	8.63697	-4.18949	0.0022025	0.00622252	-1.71049
Mid2	-1.18666	5.12482	-12.482	4.23e-07	7.53e-05	7.12823
Dsp	-1.18605	9.52963	-4.5262	0.00133533	0.00421891	-1.18848
Farp2	-1.18603	5.41549	-10.473	1.95e-06	0.000132932	5.60373
Lamb3	-1.18548	6.19987	-4.09392	0.00254605	0.00690692	-1.86131
Mettl20	-1.18283	6.55343	-3.17643	0.010862	0.0217307	-3.35602
Tmem70	-1.18271	7.95387	-5.34007	0.000426201	0.00189023	0.00791248
Psma4	-1.18084	8.83434	-7.16897	4.55e-05	0.000493723	2.35396
Fut4	-1.17938	4.51787	-13.7225	1.83e-07	5.7e-05	7.94308
Clip4	-1.17721	7.89689	-8.38894	1.27e-05	0.000264312	3.68289
Suclg2	-1.17619	8.0246	-4.33143	0.00178011	0.00526395	-1.48862
Hrk	-1.1759	6.19844	-12.4266	4.4e-07	7.62e-05	7.08974
Serinc3	-1.17439	7.39587	-6.70729	7.69e-05	0.000671229	1.80441
Ttll1	-1.17424	7.24884	-3.25168	0.00960969	0.0196871	-3.23115
Ubqln4	-1.17355	7.49651	-11.5639	8.26e-07	0.000106666	6.46592
Il15	-1.17269	6.07257	-7.73919	2.46e-05	0.00036779	2.99636
Scube2	-1.17176	6.36702	-4.81188	0.000884633	0.00316065	-0.757735
Zfp617	-1.17055	4.94691	-5.32265	0.00043631	0.00192544	-0.0166874
Cradd	-1.16464	5.61747	-8.15028	1.61e-05	0.000299112	3.4361
Acad11	-1.16448	7.81869	-2.68574	0.0243817	0.0421479	-4.17094
Ulk1	-1.16383	7.58244	-3.84141	0.00375663	0.00933648	-2.26497
Dennd4c	-1.16371	6.26542	-4.35153	0.00172764	0.00514664	-1.45742
Laptm4a	-1.16295	10.8258	-4.10058	0.00252037	0.00686549	-1.85077
C1ra	-1.16282	6.48244	-6.42028	0.000107981	0.00081691	1.44878
Itfg1	-1.1605	6.23958	-7.45552	3.32e-05	0.00042385	2.68164
Cpt2	-1.1597	7.78358	-8.3305	1.34e-05	0.000271042	3.62302
Map7	-1.15893	5.87898	-6.6811	7.93e-05	0.000684186	1.77241
Hes3	-1.15758	5.62947	-9.62366	4.01e-06	0.000173423	4.86822
Foxp2	-1.15752	5.18102	-9.80442	3.42e-06	0.000164226	5.02986
Map3k5	-1.15713	5.37178	-6.78789	7e-05	0.000639492	1.90233
Ak3	-1.15704	7.47727	-5.48681	0.000350403	0.00166378	0.213439
Lrp5	-1.1548	5.29383	-9.01514	6.96e-06	0.000209016	4.30243
Oaz2	-1.15458	9.08818	-3.57429	0.00572019	0.0130348	-2.69922
1700020I14Rik	-1.15456	6.85928	-10.9581	1.32e-06	0.000122772	5.99788
Ccnb2	-1.15424	4.97624	-12.6788	3.69e-07	7.49e-05	7.26337
Skiv2l	-1.15261	5.44637	-15.6811	5.59e-08	4.86e-05	9.07047
Meis2	-1.14959	6.43628	-10.4296	2.02e-06	0.000132932	5.56757
Dusp13	-1.14888	6.31119	-10.2409	2.36e-06	0.000141884	5.40869
Gna12	-1.14875	6.13192	-5.61265	0.000296948	0.00149482	0.387196
Mrps18a	-1.14811	8.8347	-8.43567	1.21e-05	0.00025888	3.73051
Mrpl9	-1.1481	7.12108	-6.17577	0.000145357	0.000961777	1.13701
Tmcc3	-1.14541	6.39903	-2.36292	0.0416628	0.0662605	-4.69932
Scoc	-1.14465	4.71747	-11.8049	6.9e-07	9.57e-05	6.64508
Fert2	-1.14282	5.20089	-13.1883	2.61e-07	6.23e-05	7.60269
Cacna1c	-1.14187	7.78087	-4.38667	0.0016398	0.00494479	-1.40297
Slc29a1	-1.14092	6.8981	-3.92404	0.00330452	0.00844116	-2.13209
Trim6	-1.14072	4.46135	-13.8623	1.68e-07	5.7e-05	8.02963
Slk	-1.14062	7.54423	-9.08031	6.55e-06	0.000203452	4.36468
Catsper1	-1.13973	4.45331	-12.8773	3.22e-07	6.96e-05	7.39736
C76533	-1.13936	4.46998	-15.4073	6.54e-08	4.97e-05	8.92335
Tmed10	-1.13863	9.06584	-7.98178	1.91e-05	0.000328367	3.25814
Aig1	-1.13803	7.04773	-6.30727	0.000123767	0.0008791	1.3057
Rtn2	-1.13777	7.97107	-4.00968	0.00289605	0.00762155	-1.99516
Dcaf8	-1.13675	6.61799	-9.59146	4.13e-06	0.000174226	4.83913
Sh2b3	-1.13415	5.72558	-5.59725	0.000302989	0.00151588	0.366054
Ankrd46	-1.133	7.41671	-12.9901	2.98e-07	6.62e-05	7.47243
Xpo4	-1.13133	5.81387	-8.9177	7.62e-06	0.000215336	4.2086
Dynll2	-1.13091	8.96149	-6.93351	5.93e-05	0.00057714	2.07709
Slc2a2	-1.12976	4.48965	-9.66057	3.88e-06	0.000173423	4.90146
Nedd1	-1.12916	6.91703	-7.22942	4.25e-05	0.000477696	2.42393
Entpd5	-1.12858	7.39477	-5.48503	0.00035123	0.00166528	0.210966
Klk11	-1.12808	5.57428	-9.93533	3.06e-06	0.000159577	5.14515
2310031A07Rik	-1.12744	4.18166	-16.7234	3.14e-08	4.68e-05	9.60287
Slc46a2	-1.12687	4.85104	-16.0181	4.62e-08	4.68e-05	9.24734
Plce1	-1.12679	7.07324	-9.90805	3.13e-06	0.000160583	5.12125
Car3	-1.12618	4.90647	-10.2635	2.32e-06	0.000141884	5.42781
Msrb2	-1.12548	7.52893	-6.4704	0.000101694	0.000790037	1.51167
Dnm3	-1.12527	5.73388	-10.2478	2.35e-06	0.000141884	5.41452
Hmgcs2	-1.12489	5.21534	-10.1374	2.57e-06	0.00014813	5.32023
Lipe	-1.12477	7.80061	-4.30064	0.0018638	0.00546247	-1.53653
Ifna11	-1.12373	4.33407	-8.70977	9.29e-06	0.000229049	4.00525
Gata4	-1.12251	7.50667	-4.64361	0.00112583	0.00374077	-1.01006
Pmm1	-1.12223	6.35045	-7.43358	3.4e-05	0.000427774	2.65691
Psmd10	-1.12161	5.05617	-10.5478	1.83e-06	0.000132285	5.66565
Abcc9	-1.12155	7.53829	-3.26349	0.00942714	0.0193768	-3.21158
Bdh1	-1.12122	7.70307	-2.59864	0.0281744	0.0475759	-4.31461
Klf15	-1.12004	6.63073	-3.36041	0.00805837	0.0171307	-3.05117
Mpp4	-1.11971	4.2163	-8.36493	1.3e-05	0.000266704	3.65834
Sod3	-1.11867	6.87732	-6.79947	6.91e-05	0.000635695	1.91632
Fahd1	-1.11822	6.34716	-4.91749	0.000761989	0.00283023	-0.601407
Ghr	-1.11759	7.63659	-8.62785	1e-05	0.000241374	3.92394
Mpst	-1.1168	6.41399	-7.73119	2.48e-05	0.000368264	2.98762
Pdk2	-1.1167	9.45514	-3.88554	0.00350756	0.0088575	-2.1939
Entpd2	-1.11664	8.01216	-6.11586	0.000156522	0.00100359	1.05936
Dcun1d1	-1.116	4.91087	-9.11603	6.34e-06	0.000201328	4.39863
Psmb10	-1.11511	8.15625	-6.21234	0.00013897	0.000938549	1.18416
Hrasls	-1.11488	6.44193	-5.98035	0.00018536	0.00110728	0.881891
Adamts15	-1.11454	6.21521	-8.82723	8.3e-06	0.000222907	4.12065
Wbp1l	-1.11248	7.23293	-6.42542	0.000107318	0.000815067	1.45524
Epm2aip1	-1.11205	4.86995	-12.5687	3.98e-07	7.53e-05	7.18804
Tollip	-1.11159	7.56993	-7.07331	5.06e-05	0.000524924	2.24232
Lamb2	-1.11146	6.83338	-5.13995	0.000559407	0.00227529	-0.277413
Kcnh2	-1.11043	8.11316	-2.92387	0.0164403	0.0303671	-3.77595
Mpi	-1.10968	8.41591	-4.71596	0.00101446	0.00349718	-0.901087
Akap1	-1.10902	7.86251	-4.98653	0.000691768	0.00263615	-0.500087
Fibin	-1.10872	6.33516	-11.6309	7.85e-07	0.000102934	6.51611
Agl	-1.10854	7.86801	-3.26218	0.00944731	0.0194063	-3.21376
Rin2	-1.10841	5.12287	-7.96686	1.94e-05	0.000329952	3.24224
Adhfe1	-1.10759	7.25655	-4.13555	0.00238987	0.00662035	-1.79547
Kif16b	-1.10679	5.36051	-6.16295	0.000147672	0.000972655	1.12043
Mettl7a1	-1.10662	5.58534	-8.66313	9.71e-06	0.000236403	3.95904
Tbx5	-1.10548	6.49102	-8.46656	1.18e-05	0.000255027	3.76185
Abca8b	-1.1053	5.26525	-11.5307	8.47e-07	0.00010725	6.4409
Vldlr	-1.10494	6.89915	-7.30794	3.9e-05	0.000459378	2.51414
Gpr146	-1.10462	7.37831	-5.61162	0.000297347	0.00149625	0.385786
Oxr1	-1.10116	6.83923	-4.85449	0.000832778	0.00302255	-0.694471
Kat2b	-1.10075	7.74491	-7.17595	4.51e-05	0.000492775	2.36207
Zfyve21	-1.09995	6.00185	-6.50845	9.72e-05	0.000766682	1.55919
Tlcd2	-1.09981	5.97952	-7.99202	1.89e-05	0.000326749	3.26905
Mesp2	-1.09892	5.41849	-11.0139	1.26e-06	0.000120915	6.04207
Fbp2	-1.09869	8.03679	-9.46334	4.62e-06	0.000181731	4.72246
B230118H07Rik	-1.09858	8.40521	-5.58994	0.000305902	0.00152374	0.356009
Oxnad1	-1.09812	7.30593	-7.83174	2.23e-05	0.000353827	3.09703
Coq7	-1.09806	9.19644	-5.10836	0.000584253	0.00234391	-0.322989
Sesn1	-1.09678	6.56191	-2.32383	0.044449	0.0700279	-4.76235
A530016L24Rik	-1.09632	6.14385	-9.19527	5.89e-06	0.000195189	4.4735
Snx12	-1.09628	6.34888	-8.2814	1.41e-05	0.000279376	3.57245
Dysf	-1.09595	7.33897	-9.41902	4.81e-06	0.000182963	4.68176
Oplah	-1.09548	7.14786	-4.29435	0.0018814	0.00550415	-1.54633
Drap1	-1.09544	9.53531	-5.45559	0.00036522	0.00170466	0.169968
Smim8	-1.09507	8.00681	-4.99089	0.00068758	0.00262405	-0.493722
Mettl7a2	-1.09437	5.6636	-9.04808	6.75e-06	0.000207698	4.33395
Phospho2	-1.09398	5.87526	-8.22907	1.49e-05	0.000285495	3.51826
Immp1l	-1.09372	8.89944	-6.19082	0.00014269	0.000952844	1.15644
Gas8	-1.09009	6.24193	-15.8561	5.06e-08	4.72e-05	9.16288
Atp1a2	-1.08954	8.4413	-3.94899	0.00317959	0.00820556	-2.09211
Ide	-1.08843	7.27437	-3.86481	0.00362236	0.00907764	-2.22727
Rpap3	-1.08751	4.87787	-10.5193	1.87e-06	0.000132893	5.64216
Suco	-1.08746	5.34342	-7.12074	4.8e-05	0.000510358	2.29782
Nbr1	-1.08725	7.74832	-6.14924	0.00015019	0.000978945	1.10269
Mgp	-1.08644	11.1077	-5.48329	0.00035204	0.00166702	0.208546
Adra2a	-1.08599	5.48881	-10.2978	2.25e-06	0.000140488	5.45684
Gmnn	-1.08575	6.6135	-3.1962	0.0105176	0.021178	-3.32321
Aox1	-1.08478	6.54441	-3.89579	0.00345228	0.00874157	-2.17744
Palmd	-1.08438	7.72152	-5.02567	0.000655075	0.00253557	-0.442956
C1s1	-1.08431	6.3418	-6.31372	0.000122801	0.000874621	1.31391
Trim31	-1.08428	5.6206	-9.95588	3e-06	0.000159254	5.16311
Zbtb12	-1.08299	5.58488	-10.8509	1.43e-06	0.000126546	5.91235
Rab1b	-1.08262	8.98237	-12.9834	2.99e-07	6.62e-05	7.46804
Adar	-1.08166	5.85185	-9.79014	3.47e-06	0.00016428	5.01719
Cited4	-1.0815	5.06366	-10.2544	2.33e-06	0.000141884	5.42012
Plaa	-1.08114	6.74055	-11.4859	8.76e-07	0.00010871	6.4071
Mat2b	-1.07919	8.46561	-3.6171	0.00534427	0.0123551	-2.62919
Taf11	-1.07884	5.32755	-11.1972	1.09e-06	0.000114964	6.18577
Lrg1	-1.07762	10.9481	-3.09558	0.0123968	0.0241683	-3.49037
Sorbs1	-1.07698	8.73744	-3.6659	0.00494709	0.0116275	-2.54954
Cxcr3	-1.07616	5.61423	-9.51053	4.43e-06	0.000178788	4.76561
Nsun4	-1.07597	6.57501	-6.50927	9.71e-05	0.000766411	1.56022
Slc7a11	-1.07595	5.07051	-9.84826	3.3e-06	0.000161332	5.06863
Cep19	-1.07303	6.44214	-8.81936	8.37e-06	0.000222907	4.11295
Actg2	-1.07063	6.04535	-6.73133	7.48e-05	0.000662214	1.83371
Me1	-1.06883	9.22173	-5.28112	0.000461475	0.00199382	-0.075527
Acsl6	-1.06744	5.19923	-4.59977	0.00119962	0.00391512	-1.07646
Dkk3	-1.06737	5.52675	-12.0316	5.84e-07	9.05e-05	6.81004
Ufsp1	-1.06632	4.82308	-9.25252	5.59e-06	0.000192123	4.52722
Pitpnb	-1.06524	7.10879	-4.80096	0.000898459	0.00319518	-0.773974
Pradc1	-1.0641	4.67377	-11.3848	9.46e-07	0.000111062	6.33023
Myzap	-1.0635	8.95952	-2.83327	0.0190944	0.0344026	-3.92649
Pcdh12	-1.06263	5.42587	-9.52895	4.36e-06	0.000178788	4.78239
Senp6	-1.06208	6.12991	-14.1649	1.38e-07	5.69e-05	8.21364
Dnajb5	-1.0616	7.29771	-13.4868	2.14e-07	6.08e-05	7.79475
Cyp2e1	-1.05998	6.19071	-11.2893	1.02e-06	0.000111062	6.25697
Rab6b	-1.05975	4.6053	-8.51717	1.12e-05	0.000251721	3.81301
Ces1f	-1.05927	4.82612	-9.86096	3.26e-06	0.000160764	5.07984
Adra1b	-1.05662	6.72798	-6.56435	9.1e-05	0.000738036	1.62867
Cyfip2	-1.05599	7.90006	-3.84634	0.00372791	0.00927746	-2.25702
Strn3	-1.05485	8.2253	-5.38628	0.000400578	0.00181421	0.0729798
Abhd15	-1.05414	4.97109	-9.86821	3.24e-06	0.000160764	5.08622
Agtpbp1	-1.0523	6.65272	-6.98046	5.62e-05	0.00056042	2.13286
Elmod3	-1.05198	6.93913	-5.99815	0.000181264	0.00109446	0.905345
Gas6	-1.05196	8.3468	-6.35948	0.000116182	0.000849774	1.37202
Dctn6	-1.05081	7.59284	-9.84207	3.31e-06	0.000161332	5.06316
Mrps7	-1.05068	7.82542	-7.94311	1.99e-05	0.000333328	3.21687
Tectb	-1.04996	4.50005	-11.8275	6.78e-07	9.52e-05	6.66168
Rnf14	-1.04861	6.26481	-6.69922	7.76e-05	0.000674412	1.79456
Crebrf	-1.04837	7.0469	-6.27449	0.000128802	0.000894893	1.26387
Apcs	-1.04799	5.87348	-11.2785	1.03e-06	0.000111062	6.24868
Hipk3	-1.0465	8.44187	-4.73323	0.00098965	0.00343247	-0.875175
Sel1l	-1.04546	7.042	-5.46339	0.000361456	0.00169286	0.180841
Plg	-1.04541	4.84623	-9.49049	4.51e-06	0.000178993	4.74731
Uncx	-1.04362	4.38692	-12.003	5.96e-07	9.05e-05	6.78941
Gpt2	-1.04147	4.70622	-6.29188	0.000126102	0.00088414	1.28608
Irs4	-1.04051	4.96134	-10.8755	1.41e-06	0.000126546	5.93201
Pon2	-1.04043	4.72233	-14.8513	9.08e-08	5.57e-05	8.61451
Krtap1-5	-1.03925	5.35384	-10.0866	2.69e-06	0.000148895	5.27654
Kcnk13	-1.03891	6.17193	-14.0774	1.46e-07	5.69e-05	8.16087
Wdr46	-1.03754	5.20207	-9.42509	4.79e-06	0.000182963	4.68734
Lrrc57	-1.03646	4.90132	-10.6095	1.74e-06	0.000131423	5.7165
Fuca2	-1.03567	7.10494	-8.80112	8.51e-06	0.000224081	4.09511
Srek1ip1	-1.03506	5.01795	-5.59828	0.00030258	0.00151441	0.367473
Tspan7	-1.03437	8.58872	-4.35198	0.00172647	0.0051455	-1.45671
Bcap29	-1.03394	8.02357	-9.93872	3.05e-06	0.000159577	5.14812
Keap1	-1.03318	7.15467	-6.20743	0.00013981	0.000942271	1.17784
2019-03-06	-1.03262	9.28446	-6.65956	8.13e-05	0.000693465	1.74603
Rab24	-1.03064	5.84102	-6.14003	0.000151909	0.000986122	1.09075
Rtn4ip1	-1.02959	6.62698	-6.56548	9.08e-05	0.000737507	1.63007
Ptprg	-1.02895	5.7554	-6.1322	0.000153388	0.000992046	1.08058
Dmd	-1.02816	5.23043	-7.65842	2.68e-05	0.000379974	2.90772
C1galt1	-1.02807	6.33276	-8.45536	1.19e-05	0.000255878	3.7505
Acox1	-1.02662	9.68884	-4.31857	0.00181457	0.005347	-1.50862
Tac4	-1.02652	5.68425	-9.74095	3.62e-06	0.000167999	4.97343
Add1	-1.02633	7.99297	-6.52684	9.51e-05	0.000757523	1.5821
Slc25a24	-1.02613	4.40889	-9.23544	5.68e-06	0.000192123	4.51123
Chn1	-1.02448	5.51678	-9.32756	5.23e-06	0.000187813	4.59719
Mtfp1	-1.02428	8.31445	-5.46049	0.000362849	0.0016959	0.176804
Narf	-1.02424	6.74163	-7.23089	4.25e-05	0.000477696	2.42563
Tns1	-1.02398	10.544	-8.74295	9e-06	0.000226279	4.03798
Jph2	-1.02386	8.22409	-2.31516	0.0450915	0.0708946	-4.7763
Hes1	-1.0234	6.98262	-9.31354	5.29e-06	0.000188141	4.58415
Ift81	-1.02313	7.34121	-3.96035	0.00312439	0.00810317	-2.07394
Cacng7	-1.02267	5.01663	-8.53321	1.1e-05	0.000249876	3.82915
Tspyl1	-1.02221	6.53215	-3.85321	0.00368828	0.00919463	-2.24595
4930591A17Rik	-1.02207	5.91374	-11.8478	6.68e-07	9.52e-05	6.67654
Tspyl4	-1.022	7.55411	-3.40415	0.00750992	0.0161993	-2.97895
Atg13	-1.02194	6.96393	-7.21768	4.31e-05	0.000481236	2.41038
Bzw2	-1.02128	8.45262	-5.449	0.00036843	0.0017126	0.160784
Epdr1	-1.02027	6.09987	-8.60087	1.03e-05	0.000243817	3.89701
Serpina10	-1.0197	5.41814	-11.5016	8.65e-07	0.000108576	6.41898
C78651	-1.01948	5.74556	-9.42318	4.79e-06	0.000182963	4.68558
A030005K14Rik	-1.01919	6.71544	-7.35714	3.7e-05	0.00044628	2.57027
Mob2	-1.01885	6.86124	-5.94251	0.000194407	0.00113597	0.831872
Neo1	-1.01854	7.53587	-5.56471	0.000316194	0.00155641	0.321272
Cyp3a11	-1.0182	4.97305	-5.31513	0.000440759	0.00193442	-0.0273323
Ddx46	-1.01801	5.1878	-7.70902	2.54e-05	0.000371349	2.96334
Arhgap10	-1.01774	6.14069	-7.20932	4.35e-05	0.000482966	2.40071
Ap4s1	-1.01767	8.2596	-4.12605	0.00242461	0.00667996	-1.81048
Mycs	-1.01624	5.24951	-10.1375	2.57e-06	0.00014813	5.32036
Adtrp	-1.01448	5.8514	-13.1822	2.62e-07	6.23e-05	7.59875
Kdm7a	-1.01391	4.57981	-5.78629	0.000237159	0.00128935	0.623217
Scg5	-1.01241	4.305	-12.5859	3.93e-07	7.53e-05	7.19987
Plac1	-1.01193	6.09355	-10.1805	2.48e-06	0.000146218	5.35718
Rara	-1.01175	4.99836	-8.38772	1.27e-05	0.000264312	3.68165
Bche	-1.01012	4.4085	-10.9736	1.3e-06	0.000122153	6.01018
Tmem151b	-1.00995	6.56397	-14.6618	1.02e-07	5.69e-05	8.50605
Sgce	-1.00982	7.03583	-8.38107	1.28e-05	0.000264312	3.67485
Tes3-ps	-1.00975	6.08633	-12.2303	5.06e-07	8.36e-05	6.952
Akt1	-1.00935	8.38323	-4.57768	0.00123875	0.00400477	-1.11002
Tmem9	-1.0087	5.66992	-6.77845	7.08e-05	0.00064341	1.8909
Camk2d	-1.00773	6.77202	-6.88502	6.26e-05	0.000597866	2.01921
Kpna3	-1.00766	7.2873	-4.36443	0.00169482	0.00507202	-1.43741
Efr3a	-1.00739	6.51931	-5.91179	0.000202107	0.00116696	0.791104
Asb8	-1.00625	8.11124	-3.09437	0.0124214	0.0242046	-3.49238
Mtmr1	-1.00595	6.62224	-6.28247	0.000127555	0.000890213	1.27407
Fah	-1.00584	7.57045	-2.91204	0.0167644	0.0308608	-3.79562
Ube2b	-1.0054	9.2373	-3.86816	0.00360352	0.00904554	-2.22187
Cdh5	-1.00538	7.46596	-4.93447	0.000744042	0.00278174	-0.576431
Vax2	-1.00468	6.51653	-11.4744	8.83e-07	0.00010871	6.3984
As3mt	-1.00392	6.60174	-4.03169	0.00279995	0.00742253	-1.9601
Mmachc	-1.0037	6.78292	-8.96339	7.3e-06	0.000211812	4.25271
Twsg1	-1.00368	6.54508	-6.40771	0.000109624	0.000822135	1.43295
Pygb	-1.00227	10.584	-2.91219	0.0167601	0.0308574	-3.79536
Tmco1	-1.00179	7.52109	-8.42679	1.22e-05	0.000260093	3.72148
Thrb	-1.00144	5.55722	-5.73093	0.000254668	0.001353	0.54844
Ap3m1	-1.00111	6.31343	-7.64398	2.72e-05	0.000382335	2.89179
Kif1c	-1.00026	7.40684	-7.81306	2.27e-05	0.000355439	3.07678
Dexi	-1.00019	7.2443	-4.89363	0.000788006	0.00290121	-0.636582
Vps41	-1.00004	6.25663	-10.0567	2.76e-06	0.000151114	5.25074
Zmiz1	-0.999569	5.78164	-7.48239	3.23e-05	0.000420363	2.71187
Cacna1f	-0.998731	5.4107	-8.12204	1.66e-05	0.0003043	3.4065
Cyp2s1	-0.998053	6.51604	-8.02456	1.83e-05	0.000321502	3.30363
Hsd3b1	-0.997967	4.91727	-8.36974	1.29e-05	0.000266443	3.66326
Retsat	-0.997547	6.41785	-4.87281	0.000811489	0.00296176	-0.667345
Abhd12	-0.996238	7.13309	-9.97927	2.94e-06	0.000157736	5.18352
Ndufaf3	-0.996175	7.86493	-4.96937	0.00070855	0.00268287	-0.52521
Rbm38	-0.995959	8.67303	-4.80411	0.000894456	0.00318528	-0.769298
Slc22a5	-0.995937	6.69907	-9.65881	3.89e-06	0.000173423	4.89988
Slc7a9	-0.995536	5.10409	-12.4683	4.27e-07	7.53e-05	7.11871
AW549877	-0.995469	6.53586	-5.82574	0.00022548	0.00124793	0.676226
Kpna1	-0.995387	7.68562	-5.40713	0.000389569	0.0017845	0.102229
Mcee	-0.995338	8.38432	-3.63655	0.00518212	0.0120464	-2.59742
Bdnf	-0.994939	5.84212	-10.6071	1.74e-06	0.000131423	5.71451
Hspa4l	-0.994469	7.01708	-4.52537	0.00133695	0.00422283	-1.18975
Eci1	-0.994424	10.7423	-5.30248	0.000448345	0.00195456	-0.045239
Prelp	-0.994375	7.1355	-5.80956	0.000230194	0.00126459	0.654508
Decr1	-0.99436	9.90986	-5.49121	0.000348369	0.00165653	0.21955
Rassf3	-0.993915	7.40488	-5.70493	0.000263372	0.00138456	0.513159
Hfe	-0.993848	7.31847	-4.51404	0.00135929	0.00427271	-1.20707
Spdef	-0.993796	6.12489	-10.3212	2.21e-06	0.000139785	5.4766
Smarcd3	-0.992993	7.96193	-8.93896	7.47e-06	0.000214332	4.22914
Mlycd	-0.992653	8.32452	-4.78028	0.000925313	0.00326487	-0.80481
LOC102631817	-0.990392	6.58555	-8.72917	9.12e-06	0.000226279	4.0244
Prom1	-0.990341	4.81971	-8.04724	1.79e-05	0.000317613	3.32765
Zfp444	-0.990165	5.32124	-14.2935	1.28e-07	5.69e-05	8.29046
Pcmtd2	-0.98945	5.17174	-3.53602	0.00607967	0.013689	-2.76196
Obsl1	-0.989105	6.09582	-8.50671	1.13e-05	0.000251945	3.80245
Krt35	-0.989055	5.89879	-9.71355	3.71e-06	0.000169718	4.94896
Wdr13	-0.988505	6.50305	-9.00274	7.04e-06	0.000209016	4.29054
F8a	-0.988246	5.89574	-14.9534	8.55e-08	5.57e-05	8.67225
Mbd2	-0.987991	7.01935	-6.09735	0.000160156	0.0010164	1.03527
Dixdc1	-0.987811	5.15203	-9.40064	4.89e-06	0.000183859	4.66482
Pdgfd	-0.98731	3.81323	-7.95654	1.96e-05	0.000332311	3.23122
Ubr1	-0.983752	6.37964	-7.16021	4.59e-05	0.000496206	2.34379
Clec2i	-0.983718	5.30871	-12.0095	5.94e-07	9.05e-05	6.79411
Crbn	-0.983321	6.12833	-5.92369	0.000199085	0.00115452	0.806915
Ank	-0.982833	9.46283	-3.6415	0.00514166	0.0119737	-2.58934
Asb11	-0.982008	9.508	-2.5503	0.0305293	0.0509133	-4.39405
Dlg3	-0.980995	5.905	-8.80839	8.45e-06	0.000223276	4.10223
Dnajc12	-0.980764	5.8896	-5.77692	0.000240031	0.00130063	0.610579
Mapre3	-0.980257	7.86935	-7.74532	2.44e-05	0.00036779	3.00307
Aard	-0.980019	4.29728	-14.1824	1.37e-07	5.69e-05	8.22412
Actr8	-0.979671	7.8051	-5.74171	0.000251153	0.0013403	0.563031
Vmp1	-0.979253	8.17461	-5.71047	0.000261491	0.00137837	0.520683
Dsg2	-0.978736	6.5855	-7.45712	3.32e-05	0.00042385	2.68345
Sult1a1	-0.978673	8.44546	-3.00975	0.014272	0.0271038	-3.63312
Rcan2	-0.97704	10.2589	-4.39831	0.00161179	0.00487836	-1.38499
9030624J02Rik	-0.977034	6.188	-13.3883	2.28e-07	6.08e-05	7.73193
Taf12	-0.976609	6.71216	-11.447	9.02e-07	0.00010871	6.37765
Lrpprc	-0.97657	8.49119	-4.26644	0.00196169	0.00568929	-1.58988
Cpa2	-0.97612	5.09962	-9.49332	4.5e-06	0.000178993	4.74989
Trpt1	-0.975181	5.62853	-8.74138	9.01e-06	0.000226279	4.03644
Ehbp1	-0.974885	7.63746	-3.22296	0.010069	0.0204071	-3.27879
Rapgef1	-0.974487	8.12608	-7.51424	3.12e-05	0.000412633	2.74757
Tceal1	-0.974076	5.51223	-7.70165	2.56e-05	0.000371763	2.95526
Glb1	-0.973908	6.23349	-9.84201	3.31e-06	0.000161332	5.06312
Rnd3	-0.971764	6.26568	-10.2021	2.44e-06	0.000145239	5.37564
Pcsk2	-0.971473	4.92756	-8.37159	1.29e-05	0.000266377	3.66515
Stat5a	-0.971439	5.81661	-6.16575	0.000147163	0.000971885	1.12406
Pccb	-0.971407	8.17966	-4.78457	0.00091967	0.00325033	-0.798405
Oit1	-0.970325	5.14198	-12.6126	3.86e-07	7.52e-05	7.21815
Lpin1	-0.97021	8.98882	-2.47544	0.03457	0.0565462	-4.51657
Cyp2c55	-0.969993	4.97445	-7.35767	3.7e-05	0.00044628	2.57087
Syn3	-0.969288	6.40032	-8.77852	8.7e-06	0.000225147	4.07295
Cbr4	-0.9691	8.13175	-3.66516	0.00495291	0.0116275	-2.55075
Zpbp	-0.96841	5.323	-9.64513	3.94e-06	0.000173423	4.88758
Add3	-0.967541	7.00069	-6.10749	0.000158155	0.0010089	1.04847
Fbxo31	-0.967507	7.67716	-3.71173	0.00460224	0.0109818	-2.47494
Klk1	-0.966389	4.25432	-13.4722	2.16e-07	6.08e-05	7.7855
Cirbp	-0.966009	7.9034	-2.27516	0.048175	0.0750014	-4.84045
Pde3a	-0.965549	5.19679	-9.57156	4.2e-06	0.000176183	4.82111
Hpn	-0.96482	4.59111	-6.38895	0.000112127	0.000831738	1.40928
Ppm1b	-0.964053	8.19597	-6.53128	9.46e-05	0.000756229	1.58762
Krtap5-2	-0.963791	5.32493	-6.46743	0.000102056	0.000790749	1.50795
Wwp1	-0.963116	7.1704	-7.50602	3.15e-05	0.000413947	2.73837
Lhx5	-0.962689	4.6799	-9.55948	4.24e-06	0.000177509	4.81015
Esrrb	-0.962652	5.80846	-8.73032	9.11e-06	0.000226279	4.02553
Ankrd26	-0.962554	4.67723	-10.7369	1.57e-06	0.00013088	5.82039
Dnajc15	-0.96194	9.13138	-6.44382	0.000104978	0.000807635	1.47835
Maoa	-0.960385	6.67203	-7.40288	3.52e-05	0.000433778	2.62219
Plin5	-0.959804	9.25327	-2.59254	0.0284612	0.0479862	-4.32465
Cetn3	-0.959591	5.60883	-5.70366	0.000263803	0.00138627	0.511442
Gm11767	-0.95938	4.62593	-9.64912	3.92e-06	0.000173423	4.89116
Klf2	-0.958884	8.85015	-5.36538	0.000411955	0.00184524	0.04359
Dcn	-0.958865	11.4403	-4.44449	0.0015055	0.00462098	-1.31378
Sfmbt1	-0.95874	4.80835	-11.7797	7.03e-07	9.65e-05	6.62653
Prkacb	-0.958352	6.61581	-7.86681	2.15e-05	0.000346845	3.13491
Ttc39d	-0.957732	4.54836	-14.3322	1.25e-07	5.69e-05	8.31338
Crybg3	-0.957147	7.31354	-6.6571	8.16e-05	0.000694561	1.74301
Slc16a4	-0.956498	5.30068	-7.73829	2.46e-05	0.00036779	2.99538
Oxld1	-0.956379	7.30234	-5.40056	0.000393006	0.0017955	0.0930092
Lpl	-0.956094	12.5298	-3.48148	0.00663324	0.0146596	-2.85155
Ibtk	-0.955953	6.42409	-7.83798	2.22e-05	0.000353022	3.10377
Fhod3	-0.955709	9.33609	-2.7029	0.0236976	0.0411616	-4.14258
Avpr2	-0.955663	6.34752	-9.00007	7.06e-06	0.000209016	4.28798
Usp22	-0.955085	6.21928	-3.66085	0.00498671	0.0116847	-2.55777
Sos2	-0.954736	6.21283	-6.04828	0.000170244	0.00105227	0.971171
Sgca	-0.954632	9.20758	-4.18113	0.00223047	0.00628449	-1.72363
Gja3	-0.954085	5.56762	-6.32612	0.000120968	0.000868636	1.32968
Tango2	-0.953688	8.58057	-3.99812	0.00294792	0.00772972	-2.01359
Slc35d1	-0.953684	6.24357	-11.1537	1.13e-06	0.00011703	6.15186
Eci2	-0.953228	8.94055	-6.97522	5.65e-05	0.000560476	2.12665
Gucy1b3	-0.952332	5.66075	-6.00748	0.000179156	0.00108575	0.917624
Kcnn2	-0.950501	4.60709	-9.37976	4.98e-06	0.000185818	4.64555
Ctse	-0.950155	6.49259	-5.62093	0.000293756	0.00148506	0.398542
Hist1h2bp	-0.950051	5.34001	-4.2016	0.00216261	0.00613435	-1.69146
Chad	-0.950044	5.55479	-12.0477	5.77e-07	9.05e-05	6.82162
Pax5	-0.94975	5.00317	-9.35044	5.12e-06	0.000187641	4.61841
Miox	-0.949508	5.02437	-7.26214	4.1e-05	0.00046837	2.46161
Zfp369	-0.949226	4.303	-9.3001	5.36e-06	0.000189931	4.57164
Chpt1	-0.947844	7.89226	-3.33276	0.00842643	0.0177507	-3.09688
Mrpl37	-0.947703	7.14528	-8.31354	1.37e-05	0.000274088	3.60558
Map3k4	-0.946407	7.04919	-4.89622	0.000785138	0.0028931	-0.632762
Nlrp6	-0.945918	5.89209	-7.0386	5.26e-05	0.000538948	2.20153
Gucy1a3	-0.945722	5.73715	-8.46371	1.18e-05	0.000255027	3.75897
Sult1e1	-0.945656	4.18146	-9.81761	3.38e-06	0.00016356	5.04154
Vamp7	-0.945565	4.94917	-8.4636	1.18e-05	0.000255027	3.75886
Prkce	-0.945478	6.93818	-5.43684	0.000374438	0.00173497	0.143806
Insm1	-0.945373	4.52129	-11.0115	1.26e-06	0.000120915	6.0402
Klf9	-0.945098	7.82751	-3.10559	0.0121953	0.0238567	-3.47373
Acta1	-0.944624	10.1983	-3.58656	0.00560963	0.0128209	-2.67912
Slit1	-0.943579	5.42277	-7.42958	3.42e-05	0.000427774	2.65239
Mc5r	-0.942216	5.68022	-8.88762	7.84e-06	0.000217722	4.17944
Vps35	-0.942092	7.11389	-8.04154	1.8e-05	0.000318124	3.32162
Abcc8	-0.940723	6.24456	-6.65219	8.2e-05	0.000694755	1.73699
Bcas3	-0.940701	5.7048	-9.2563	5.57e-06	0.000192123	4.53076
Sst	-0.940632	5.95637	-9.74391	3.61e-06	0.000167999	4.97607
Amacr	-0.939913	6.893	-5.13024	0.00056692	0.00230053	-0.291406
Rnf167	-0.939445	7.71904	-6.1816	0.000144318	0.000958303	1.14454
Tom1l2	-0.939265	5.03126	-6.34059	0.000118866	0.000860216	1.34806
Olfr2	-0.938915	5.67864	-10.7345	1.57e-06	0.00013088	5.81841
Srsf5	-0.93858	9.96323	-1.94982	0.0820988	0.118446	-5.34861
Rdh7	-0.938547	4.89759	-9.21019	5.81e-06	0.000194515	4.48753
Tmem192	-0.938215	6.34943	-7.6633	2.66e-05	0.000379094	2.91309
Kdm5a	-0.938124	5.9327	-10.457	1.97e-06	0.000132932	5.5904
Sfxn4	-0.937939	5.36729	-9.609	4.06e-06	0.000173797	4.85499
Cxx1c	-0.937396	6.47057	-10.5731	1.79e-06	0.000131423	5.68655
Slc12a7	-0.937014	8.60349	-5.7839	0.000237887	0.00129224	0.619998
Zfp810	-0.935418	5.11052	-7.80529	2.29e-05	0.000357391	3.06836
Gucy2c	-0.934563	5.07202	-9.33563	5.19e-06	0.000187656	4.60468
Slc5a6	-0.934475	5.47363	-9.51905	4.4e-06	0.000178788	4.77337
Pcdhb12	-0.934427	4.29483	-5.05177	0.000631776	0.00247699	-0.404989
Pyroxd1	-0.934127	5.31713	-5.06147	0.000623339	0.00245201	-0.390893
Iyd	-0.932707	4.74627	-8.83814	8.22e-06	0.000222476	4.13129
Chek2	-0.930307	5.62075	-12.0444	5.79e-07	9.05e-05	6.81928
Fhl2	-0.929059	11.3378	-2.88695	0.0174732	0.0319315	-3.83732
Ipo8	-0.929052	5.32897	-6.46967	0.000101782	0.000790037	1.51076
Trp53inp2	-0.929008	10.6799	-2.45727	0.035628	0.0580295	-4.54619
Rxrg	-0.928954	7.0204	-6.90884	6.1e-05	0.000588324	2.04768
Vill	-0.926999	5.48384	-9.74392	3.61e-06	0.000167999	4.97608
Limk2	-0.926802	6.5021	-10.6723	1.66e-06	0.00013088	5.76782
Tex18	-0.926789	3.80335	-9.36777	5.04e-06	0.000187303	4.63446
Syne2	-0.926736	4.86693	-6.13529	0.000152802	0.000990173	1.0846
Mrpl34	-0.926547	8.27154	-5.28316	0.000460204	0.00199162	-0.0726327
Rprd1a	-0.926534	7.2695	-8.90862	7.69e-06	0.000216406	4.1998
Chmp3	-0.926467	5.82986	-7.96873	1.94e-05	0.000329751	3.24423
Neil3	-0.926434	4.83488	-8.52499	1.11e-05	0.00025101	3.82088
Atp8b2	-0.925663	5.87019	-6.51688	9.62e-05	0.000763936	1.5697
Igj	-0.925086	4.06472	-9.94896	3.02e-06	0.000159254	5.15707
St3gal5	-0.924845	7.79518	-5.88068	0.000210239	0.00119393	0.749694
Mfn2	-0.924685	7.51892	-6.57389	8.99e-05	0.000732951	1.64048
Gspt2	-0.924524	5.63487	-11.0555	1.22e-06	0.000120915	6.0749
Adsl	-0.923634	6.58072	-7.54075	3.03e-05	0.000405173	2.7772
Ackr2	-0.923276	5.06627	-8.88635	7.85e-06	0.000217722	4.17821
D1Ertd164e	-0.923037	4.58112	-10.0841	2.69e-06	0.000148895	5.27437
Zfp869	-0.922273	4.77996	-8.29661	1.39e-05	0.000277705	3.58814
Vmn1r171	-0.922172	4.0919	-8.81871	8.37e-06	0.000222907	4.11232
Atf6	-0.92204	8.46194	-3.95627	0.00314407	0.00813804	-2.08045
Slc41a3	-0.921629	7.26591	-2.69407	0.0240473	0.0416582	-4.15719
Polr3c	-0.921578	4.79624	-9.33444	5.19e-06	0.000187656	4.60358
Fance	-0.921191	4.75618	-9.5438	4.3e-06	0.000178623	4.7959
Acacb	-0.921071	9.22704	-3.10718	0.0121635	0.0238052	-3.47108
Klk1b24	-0.920757	6.04749	-8.49008	1.15e-05	0.000253982	3.78566
Mx2	-0.920754	6.10424	-7.99789	1.88e-05	0.000326749	3.2753
Ciao1	-0.920618	7.39728	-5.89996	0.000205158	0.00117769	0.775377
Rabac1	-0.919705	9.97532	-5.7019	0.000264405	0.00138776	0.509049
Pde4dip	-0.919356	9.83923	-6.4281	0.000106973	0.000813394	1.45861
Pipox	-0.919313	5.62897	-9.31853	5.27e-06	0.000188141	4.5888
Mak	-0.919131	5.07288	-10.8429	1.44e-06	0.000126546	5.90594
Il1f8	-0.918953	5.88428	-7.46806	3.28e-05	0.00042385	2.69576
Calb2	-0.918185	6.03011	-7.40681	3.5e-05	0.00043314	2.62665
Ptcd1	-0.917543	5.66615	-6.72119	7.57e-05	0.000663556	1.82137
Fv1	-0.917412	5.48918	-9.04038	6.8e-06	0.000207765	4.32658
Fabp3	-0.917224	12.8546	-3.58092	0.00566017	0.0129206	-2.68836
2510009E07Rik	-0.916687	6.54237	-8.43465	1.21e-05	0.00025888	3.72947
Sstr1	-0.916649	4.91753	-10.6863	1.64e-06	0.00013088	5.77925
Frmd5	-0.916403	8.56838	-3.97708	0.00304489	0.00792182	-2.04719
Crhr2	-0.915803	5.13599	-8.61991	1.01e-05	0.00024194	3.91602
Atp5s	-0.915786	7.48687	-5.81832	0.000227628	0.00125513	0.666276
Dkk4	-0.915755	4.59324	-10.6094	1.74e-06	0.000131423	5.71641
Kynu	-0.915139	4.95318	-8.24784	1.46e-05	0.000283726	3.53772
Taz	-0.915047	7.36391	-9.12779	6.27e-06	0.000200547	4.40978
Fbxo3	-0.914918	6.2713	-6.31182	0.000123084	0.000875679	1.3115
Tas1r3	-0.914582	5.73158	-7.81853	2.26e-05	0.000355039	3.08272
Ccndbp1	-0.913122	6.88526	-4.62237	0.00116096	0.00382433	-1.0422
Calml3	-0.913115	4.77274	-11.0762	1.2e-06	0.000120915	6.09117
Stard8	-0.912847	6.88599	-6.15007	0.000150036	0.000978945	1.10377
Cplx4	-0.912711	5.1227	-7.49598	3.18e-05	0.000416338	2.72712
Ablim1	-0.911153	9.87933	-3.24341	0.00973973	0.0199078	-3.24487
Chrnb3	-0.910644	5.21078	-10.7351	1.57e-06	0.00013088	5.81891
Olfml2b	-0.910637	7.60206	-4.14482	0.00235651	0.00654903	-1.78084
Slc31a2	-0.910491	7.0977	-8.05681	1.77e-05	0.000317087	3.33777
Wbscr16	-0.909477	5.48614	-7.68534	2.6e-05	0.000375197	2.93735
Ppp1r14c	-0.90787	8.83206	-4.71169	0.00102069	0.00351304	-0.907495
Usp20	-0.907351	6.86666	-5.51605	0.000337118	0.00162171	0.254012
Nedd4	-0.906967	9.34067	-5.23986	0.000488034	0.00207018	-0.134238
Top3a	-0.906017	5.89553	-11.3066	1e-06	0.000111062	6.27034
Cd59a	-0.905865	8.77365	-2.97891	0.0150147	0.0282293	-3.6844
Mpp5	-0.904984	6.56677	-10.4281	2.02e-06	0.000132932	5.56635
Pecam1	-0.904762	8.38239	-2.93218	0.0162163	0.0300123	-3.76212
Aifm1	-0.904473	8.22232	-5.11377	0.000579913	0.00233324	-0.315171
Ptprv	-0.904464	5.79899	-10.0684	2.73e-06	0.000150245	5.26089
Dhx36	-0.90441	5.55263	-7.25102	4.15e-05	0.000472075	2.44882
Aqp7	-0.904367	4.87322	-6.7035	7.72e-05	0.000672847	1.79979
Nt5m	-0.90333	7.22583	-12.8616	3.25e-07	6.96e-05	7.38683
Rgn	-0.903317	4.94486	-6.06936	0.000165829	0.00103627	0.99875
Cdhr5	-0.903308	5.5154	-8.45514	1.19e-05	0.000255878	3.75028
Fbp1	-0.902721	5.53097	-8.15314	1.6e-05	0.0002991	3.4391
Socs6	-0.902524	5.33626	-4.55866	0.00127353	0.0040871	-1.13896
Traf5	-0.901601	6.49779	-9.90759	3.13e-06	0.000160583	5.12085
Krtap13	-0.901558	4.73454	-9.61888	4.03e-06	0.000173423	4.86392
Hes6	-0.901432	5.31	-7.51071	3.13e-05	0.000412695	2.74363
Emc9	-0.900998	7.93188	-6.04186	0.000171615	0.00105874	0.962759
Tst	-0.900891	6.31691	-6.07133	0.000165423	0.00103473	1.00132
Fam134b	-0.900087	9.29081	-3.42941	0.00721097	0.0156736	-2.93728
Gpr56	-0.899891	7.242	-4.26676	0.00196074	0.00568779	-1.58938
Aaed1	-0.898828	5.42756	-5.3379	0.000427447	0.00189386	0.0048495
Entpd6	-0.898634	7.96962	-10.1632	2.52e-06	0.000147261	5.34238
Msmo1	-0.898257	5.88634	-5.42777	0.000378989	0.00174922	0.131126
Becn1	-0.897945	5.77972	-11.0409	1.23e-06	0.000120915	6.06344
Pcyt1a	-0.897908	7.16873	-6.43937	0.000105539	0.00080912	1.47277
Nt5c3	-0.897746	7.21988	-4.60635	0.00118822	0.00389252	-1.06648
Ccr1l1	-0.897714	5.81556	-6.37974	0.000113377	0.000836506	1.39765
Clrn3	-0.896146	5.39428	-8.27729	1.42e-05	0.000279741	3.5682
Serpinb7	-0.895812	4.6659	-7.09648	4.93e-05	0.000518893	2.26946
Mark4	-0.895633	6.59338	-5.01003	0.000669484	0.00257303	-0.465765
Foxe3	-0.895605	5.8125	-8.50736	1.13e-05	0.000251945	3.80311
Neurod2	-0.895302	7.58077	-6.97561	5.65e-05	0.000560476	2.12712
Sepp1	-0.895226	10.9387	-3.5991	0.00549902	0.0126229	-2.65861
Il9r	-0.894513	5.22893	-8.54905	1.08e-05	0.000249464	3.84508
Nos1	-0.894124	5.69577	-10.1275	2.6e-06	0.000148554	5.31178
Mturn	-0.893994	5.68305	-7.77173	2.37e-05	0.000363055	3.03187
Fundc1	-0.893817	6.92134	-8.02957	1.82e-05	0.000320294	3.30894
Egln1	-0.893345	10.1209	-4.15168	0.00233212	0.00649388	-1.77002
Tnfrsf17	-0.892937	4.91508	-11.3827	9.47e-07	0.000111062	6.32862
Comp	-0.89257	6.10039	-7.54178	3.03e-05	0.000405173	2.77835
Ppm1a	-0.892096	6.19396	-6.5992	8.73e-05	0.000718073	1.67177
Stard13	-0.892003	5.82539	-8.54066	1.09e-05	0.000249464	3.83665
Ccdc92	-0.891934	5.85147	-11.8736	6.56e-07	9.52e-05	6.69539
Abhd6	-0.891532	6.03743	-9.51837	4.4e-06	0.000178788	4.77275
St3gal6	-0.891343	6.5114	-5.62462	0.000292342	0.00147955	0.403606
Pknox1	-0.891216	5.23209	-6.97911	5.63e-05	0.000560476	2.13126
Tfpi	-0.891134	7.40611	-7.16153	4.59e-05	0.00049617	2.34532
Ramp1	-0.890632	5.85972	-6.39706	0.000111037	0.000826006	1.41951
Wap	-0.890028	5.57349	-9.63008	3.99e-06	0.000173423	4.87402
Epb4.1l2	-0.890025	6.13185	-8.8633	8.03e-06	0.000220036	4.15581
Itgb1bp2	-0.889767	9.67412	-2.85573	0.0183983	0.0332955	-3.88919
Krcc1	-0.889545	6.24452	-4.84003	0.000849995	0.00306798	-0.715904
Cst8	-0.889539	4.21839	-10.2588	2.32e-06	0.000141884	5.42385
Pkdrej	-0.889345	5.83668	-7.06974	5.08e-05	0.000526195	2.23813
Sdpr	-0.889109	8.68172	-3.93675	0.00324025	0.00831508	-2.11171
Bsg	-0.888946	11.9443	-2.82841	0.0192486	0.0346422	-3.93457
Reg3g	-0.888691	4.2198	-9.34257	5.15e-06	0.000187656	4.61112
Art1	-0.888252	7.73654	-2.52009	0.0320997	0.0531384	-4.44356
Magix	-0.888075	6.15752	-4.37104	0.00167828	0.00503407	-1.42718
Scd2	-0.887571	5.32986	-5.60649	0.000299349	0.00150201	0.378742
Ehmt2	-0.887362	7.21081	-5.94351	0.000194164	0.00113538	0.833187
Rbbp4	-0.887208	7.94269	-4.87545	0.000808474	0.00295407	-0.663447
Chkb	-0.887111	8.29622	-6.66318	8.1e-05	0.000693257	1.75046
Fkbp5	-0.88641	8.59261	-2.67698	0.0247389	0.0426806	-4.18543
Fmo5	-0.886394	5.02012	-6.7327	7.47e-05	0.000661854	1.83538
Mr1	-0.886038	5.91135	-3.96108	0.00312087	0.00809725	-2.07277
Dnaja3	-0.88588	6.45164	-7.04988	5.2e-05	0.00053341	2.2148
Nkx6-1	-0.88569	4.93888	-10.6203	1.73e-06	0.000131423	5.72533
Sgcb	-0.885611	7.60604	-5.70523	0.000263269	0.00138456	0.513572
Spr	-0.884773	7.50672	-5.41289	0.000386588	0.00177675	0.11029
Ifrd2	-0.884464	7.31566	-6.03244	0.000173645	0.00106472	0.950417
Armc1	-0.884375	7.1224	-8.17893	1.56e-05	0.000294799	3.46605
Myo5b	-0.884009	6.73198	-10.5128	1.88e-06	0.000132893	5.63675
Cntn1	-0.883261	5.13537	-8.36396	1.3e-05	0.000266704	3.65735
Cyp2c38	-0.882904	7.08025	-7.11446	4.83e-05	0.000513532	2.29049
Galnt6	-0.882701	5.70849	-8.87147	7.96e-06	0.000219219	4.16376
Gstt2	-0.882393	5.60911	-6.74509	7.36e-05	0.000657753	1.85044
Tubgcp2	-0.882318	7.20271	-6.72588	7.53e-05	0.000662214	1.82708
Ptp4a2	-0.881748	8.40276	-3.53447	0.00609473	0.0137135	-2.7645
Ube2h	-0.880874	7.71539	-4.63607	0.00113817	0.00376733	-1.02147
Smarca2	-0.879587	5.66334	-5.03356	0.000647935	0.00251915	-0.431466
Ccni	-0.879308	8.36399	-3.40187	0.0075375	0.016248	-2.9827
Fbxl20	-0.877851	7.33524	-5.86595	0.000214211	0.00120788	0.730047
Ubd	-0.877572	4.88118	-8.23268	1.48e-05	0.000285495	3.522
Klhl22	-0.877476	7.84914	-6.1544	0.000149237	0.000977039	1.10938
Atp6v0a1	-0.877443	6.96617	-5.39807	0.000394315	0.00179833	0.0895195
Ulk2	-0.87722	7.0248	-6.01204	0.000178135	0.00108107	0.923623
Coq5	-0.877074	8.15277	-6.08835	0.000161957	0.00102236	1.02354
Sec61a2	-0.876445	5.69857	-8.82113	8.35e-06	0.000222907	4.11468
Stmn4	-0.87583	6.30481	-7.32967	3.81e-05	0.000454718	2.53897
Neu3	-0.87542	6.08555	-11.4416	9.06e-07	0.00010871	6.3735
Cyp2g1	-0.874084	4.8843	-8.97218	7.25e-06	0.000211487	4.26118
Pou2f2	-0.873799	6.07552	-10.5668	1.8e-06	0.000131423	5.68135
Eif4g1	-0.873738	8.15166	-6.73387	7.46e-05	0.000661408	1.8368
Mep1a	-0.873541	5.94401	-5.7143	0.000260199	0.00137397	0.525883
Slc26a1	-0.87308	5.18366	-13.0109	2.94e-07	6.62e-05	7.48621
Nr1d1	-0.87295	8.35392	-2.67059	0.0250024	0.0430214	-4.19598
Ergic2	-0.872896	4.93768	-8.53852	1.1e-05	0.000249464	3.8345
C9	-0.872657	6.46512	-9.17244	6.02e-06	0.000196424	4.45199
Fam126a	-0.87263	7.61087	-4.91882	0.000760574	0.00282815	-0.599459
Pten	-0.871901	7.70738	-5.5721	0.000313144	0.00154593	0.331447
Rab38	-0.871757	5.33324	-9.905	3.14e-06	0.000160583	5.11857
Kcnj12	-0.871436	5.17308	-4.36204	0.00170086	0.00508539	-1.44112
Dnaja2	-0.871434	8.0752	-2.79386	0.0203813	0.0363471	-3.9919
Gjb4	-0.87142	4.69932	-12.3957	4.5e-07	7.62e-05	7.06822
Abcd3	-0.870602	8.68751	-3.91234	0.00336492	0.00855631	-2.15087
1810065E05Rik	-0.870332	5.60445	-10.0923	2.67e-06	0.000148895	5.28151
L3hypdh	-0.870093	4.42531	-7.36589	3.66e-05	0.00044451	2.58023
Poldip2	-0.869742	7.91012	-6.23147	0.000135749	0.00092289	1.20876
Tcea3	-0.86973	7.03508	-2.50626	0.0328456	0.0541945	-4.46621
Fmnl1	-0.869728	6.86906	-8.41849	1.23e-05	0.000260947	3.71303
Rrp1	-0.86967	8.13761	-5.57799	0.000310732	0.00153963	0.339566
Idh3a	-0.86954	9.91804	-2.91415	0.0167058	0.0307704	-3.79209
Syt5	-0.869394	5.88088	-8.01824	1.84e-05	0.000322283	3.29691
Gpsm1	-0.869334	6.50464	-6.87118	6.36e-05	0.000603059	2.00262
Gorasp2	-0.869271	8.03422	-3.10735	0.0121602	0.0238024	-3.47081
C77068	-0.869244	4.24744	-8.22851	1.49e-05	0.000285495	3.51767
Kcnk1	-0.868993	5.2258	-9.89443	3.17e-06	0.000160764	5.10929
Pex19	-0.868777	7.63889	-3.68658	0.00478824	0.0113327	-2.51586
Oat	-0.86867	9.21049	-6.38182	0.000113093	0.000835729	1.40028
Abca1	-0.867908	5.94023	-5.24455	0.000484935	0.00206038	-0.127554
Htr2b	-0.867723	5.9938	-8.85863	8.06e-06	0.000220036	4.15126
Pex3	-0.867441	6.39479	-6.73013	7.49e-05	0.000662214	1.83225
Hspb7	-0.86719	12.08	-2.75045	0.0219008	0.0385571	-4.06386
Kcna1	-0.866887	5.55607	-10.1846	2.47e-06	0.000146218	5.36066
Mageb3	-0.866431	4.25044	-7.97491	1.92e-05	0.000329296	3.25083
Hnrnpm	-0.866251	6.35665	-3.35264	0.00816015	0.0173128	-3.06402
Selenbp1	-0.866196	8.68176	-3.36766	0.00796471	0.0169643	-3.0392
Inpp5a	-0.865616	10.3922	-3.37699	0.00784578	0.0167466	-3.02379
Arhgap39	-0.865583	3.6968	-13.7534	1.8e-07	5.7e-05	7.9623
Ankrd32	-0.865395	4.29766	-6.4681	0.000101974	0.000790749	1.50879
Gja5	-0.864927	4.60611	-9.2394	5.66e-06	0.000192123	4.51494
Krt85	-0.864856	6.2345	-8.73835	9.04e-06	0.000226279	4.03345
Ube2g2	-0.86474	7.4111	-6.19331	0.000142254	0.000952329	1.15965
Coa5	-0.864676	7.61256	-7.86732	2.15e-05	0.000346845	3.13546
Mfn1	-0.864609	8.86332	-4.47854	0.00143193	0.00444007	-1.26145
Lcn8	-0.864572	4.89871	-12.5438	4.05e-07	7.53e-05	7.17094
Crot	-0.864331	5.14791	-4.09837	0.00252885	0.00687855	-1.85426
Kel	-0.863614	4.63762	-7.63452	2.74e-05	0.00038536	2.88134
Tfb2m	-0.863302	7.84387	-5.82571	0.000225488	0.00124793	0.67619
Thrsp	-0.863146	6.4089	-3.00369	0.0144148	0.0273181	-3.64319
Cdkn1c	-0.862065	6.77667	-3.48002	0.00664881	0.0146866	-2.85396
6820431F20Rik	-0.861841	4.71577	-7.87333	2.14e-05	0.000346199	3.14194
Dld	-0.861748	8.28114	-1.90909	0.0876888	0.125264	-5.41014
Magee1	-0.861616	4.86094	-5.37877	0.000404628	0.00182621	0.0624242
Arnt	-0.861373	5.7548	-4.77864	0.000927483	0.00326987	-0.807263
1700001K19Rik	-0.86126	5.07505	-10.7101	1.61e-06	0.00013088	5.79861
Pcdh10	-0.861152	4.94848	-8.92332	7.58e-06	0.000215309	4.21404
Zp2	-0.860919	5.44137	-10.5733	1.79e-06	0.000131423	5.6867
Ccdc127	-0.860226	6.40768	-8.72601	9.14e-06	0.000226375	4.02128
Polr3gl	-0.860058	6.31697	-4.53594	0.00131646	0.00418039	-1.17362
Ctnnal1	-0.859893	5.35147	-5.94708	0.000193291	0.00113388	0.837916
Gna14	-0.859385	4.46895	-11.1783	1.11e-06	0.00011573	6.17106
1200014J11Rik	-0.859192	6.37922	-10.6971	1.62e-06	0.00013088	5.78808
Zfand6	-0.858787	8.66068	-7.17087	4.54e-05	0.000493387	2.35617
Rarb	-0.858172	6.22179	-7.17167	4.53e-05	0.000493387	2.3571
Tagln	-0.857814	7.68416	-4.0499	0.00272301	0.00727027	-1.93116
Mrps36	-0.857522	9.18864	-5.88098	0.000210159	0.00119393	0.750094
Cdc37l1	-0.857295	7.25127	-6.67296	8.01e-05	0.000688529	1.76246
Cish	-0.857159	9.01943	-4.28482	0.0019084	0.00556692	-1.56118
Inmt	-0.85709	6.06967	-5.63546	0.000288238	0.00146911	0.41845
Arntl2	-0.857018	6.50692	-8.56985	1.06e-05	0.00024804	3.86596
Gprc5c	-0.856509	5.78327	-10.432	2.01e-06	0.000132932	5.56956
Enkd1	-0.855663	5.23821	-6.99423	5.53e-05	0.000554844	2.14917
Adra1a	-0.855656	5.0069	-7.99639	1.88e-05	0.000326749	3.2737
Hspa9	-0.855656	7.67725	-8.00927	1.86e-05	0.000323945	3.2874
Il2	-0.855408	4.87066	-7.78146	2.35e-05	0.000361218	3.04246
Steap3	-0.854969	5.7982	-8.5724	1.06e-05	0.000247871	3.86852
Timp2	-0.854924	7.32705	-6.11287	0.000157102	0.00100548	1.05548
Tor1aip1	-0.854773	6.81908	-6.15696	0.000148767	0.000975435	1.11268
Pygm	-0.85452	10.8514	-3.09908	0.0123259	0.0240473	-3.48455
Uqcrfs1	-0.854445	11.9831	-3.26997	0.00932862	0.0192169	-3.20085
Gpr108	-0.853539	7.70454	-5.84001	0.00022141	0.0012323	0.695349
Tbce	-0.853494	6.99742	-7.35476	3.71e-05	0.000447024	2.56757
Fbln1	-0.853351	7.08287	-4.3781	0.00166078	0.004993	-1.41624
Evx1	-0.853041	5.10475	-9.5345	4.34e-06	0.000178628	4.78744
Psmc3	-0.852481	9.23798	-6.56576	9.08e-05	0.000737507	1.63042
Keg1	-0.852217	5.16907	-8.99512	7.09e-06	0.000209348	4.28323
Zswim7	-0.851949	6.16062	-5.55578	0.000319928	0.0015711	0.308949
Zyg11a	-0.851169	5.41971	-8.75585	8.89e-06	0.000226279	4.05068
Ywhag	-0.850694	8.43967	-3.18567	0.0106997	0.0214685	-3.34069
Gmpr	-0.850469	8.65393	-3.08318	0.0126512	0.0245973	-3.51099
Sgcg	-0.850376	7.81197	-3.68323	0.00481364	0.0113722	-2.52132
Arl1	-0.850073	7.91334	-4.25182	0.00200519	0.00578459	-1.61274
Deptor	-0.84971	6.62981	-8.7876	8.62e-06	0.000224586	4.08186
Pxmp2	-0.848875	9.16323	-3.91995	0.00332552	0.00848815	-2.13865
Nelfcd	-0.848228	6.06204	-8.4097	1.24e-05	0.000261517	3.70407
Wisp2	-0.848126	6.84063	-8.68526	9.51e-06	0.000232522	3.98099
Bloc1s6	-0.848078	7.09799	-10.0937	2.67e-06	0.000148895	5.28269
Cwh43	-0.847965	6.0042	-9.26503	5.53e-06	0.000192123	4.53892
Eef2k	-0.847963	7.00909	-4.49386	0.00140009	0.00436522	-1.23797
Emc2	-0.847841	8.96406	-7.30835	3.9e-05	0.000459378	2.51461
Tex16	-0.847798	4.29363	-9.41419	4.83e-06	0.000182963	4.6773
Dgcr2	-0.847277	6.67681	-8.25009	1.46e-05	0.000283622	3.54006
Fzr1	-0.846771	5.95662	-3.23675	0.00984583	0.0200669	-3.25592
Kank3	-0.84617	5.64089	-5.17985	0.000529635	0.00218416	-0.220051
B230354O11Rik	-0.84613	4.68485	-6.86352	6.42e-05	0.000604618	1.99344
Ddx19a	-0.845997	7.78757	-8.76771	8.79e-06	0.000225683	4.06234
Slc51a	-0.845868	4.66867	-8.76991	8.77e-06	0.000225655	4.0645
Dll3	-0.845602	4.74752	-8.97259	7.24e-06	0.000211487	4.26157
Dtnb	-0.845444	6.39605	-8.7292	9.12e-06	0.000226279	4.02442
2510002D24Rik	-0.845234	5.78256	-8.49948	1.14e-05	0.000252168	3.79515
4833439L19Rik	-0.844964	7.51419	-8.26305	1.44e-05	0.000281967	3.55348
H2afy2	-0.844866	5.61242	-7.17234	4.53e-05	0.000493387	2.35787
Atp8a1	-0.844826	6.25253	-6.43363	0.000106266	0.000811329	1.46556
Acot13	-0.844784	10.4244	-3.72791	0.00448661	0.0107494	-2.44866
Mgst3	-0.844741	8.24912	-6.88318	6.28e-05	0.000597866	2.01701
Tnfrsf13b	-0.844626	4.45337	-9.02466	6.9e-06	0.000208866	4.31155
Nrbp2	-0.844412	7.10107	-6.44244	0.00010515	0.00080827	1.47663
Kcnk10	-0.844404	4.65937	-7.03476	5.29e-05	0.000540436	2.19701
Lama3	-0.844042	5.56529	-6.96934	5.69e-05	0.000562086	2.11968
Ncoa2	-0.843838	5.85291	-7.19651	4.41e-05	0.000486551	2.3859
Pex7	-0.843579	7.73657	-5.0708	0.000615347	0.00243222	-0.377362
Mapk14	-0.84347	6.13541	-7.88834	2.1e-05	0.000343873	3.1581
Tmem47	-0.843326	4.66406	-8.09579	1.7e-05	0.000309016	3.3789
Msn	-0.842201	9.69102	-2.37111	0.041101	0.065474	-4.68608
Rrm2b	-0.84219	6.7612	-7.27589	4.04e-05	0.000466279	2.4774
Sdhd	-0.842084	9.27791	-4.39247	0.00162578	0.00490591	-1.39401
Dync1li1	-0.841275	8.68975	-9.62027	4.02e-06	0.000173423	4.86517
Nudt9	-0.840943	8.25014	-7.08634	4.99e-05	0.000521542	2.25759
Cldn7	-0.840883	5.52856	-11.0455	1.23e-06	0.000120915	6.06707
Capzb	-0.840563	8.15055	-4.27696	0.00193101	0.00562155	-1.57345
Rbbp9	-0.840529	3.67715	-6.56177	9.12e-05	0.00073939	1.62547
Foxd2	-0.840347	6.22377	-6.67315	8e-05	0.000688529	1.76269
Tex19.2	-0.840068	5.65672	-6.94867	5.83e-05	0.000569397	2.09513
Itgb1bp1	-0.840054	6.9328	-7.30287	3.92e-05	0.000460306	2.50833
Dr1	-0.839498	4.99169	-7.26937	4.07e-05	0.000466697	2.46992
Sema3a	-0.83895	4.65757	-11.2066	1.08e-06	0.000114964	6.19306
Pclo	-0.838523	4.30431	-8.86127	8.04e-06	0.000220036	4.15383
Smpdl3a	-0.837923	8.06366	-4.16794	0.00227543	0.00637667	-1.7444
4932416H05Rik	-0.837852	4.34494	-7.59435	2.86e-05	0.000395221	2.83685
Il27ra	-0.837235	6.21063	-10.733	1.58e-06	0.00013088	5.81725
Ddx24	-0.837225	8.64022	-3.14257	0.0114794	0.0227271	-3.41227
Pcca	-0.837112	8.823	-4.13968	0.00237494	0.00658764	-1.78895
Mapk8ip3	-0.83706	6.3074	-6.21106	0.000139187	0.000939531	1.18252
Cenpf	-0.836686	5.74818	-4.54444	0.00130023	0.00414507	-1.16065
Ezh1	-0.836055	6.26455	-7.31309	3.88e-05	0.000458947	2.52003
Dpyd	-0.835953	4.18515	-6.84284	6.57e-05	0.000614507	1.96859
Steap4	-0.835806	6.90152	-2.76656	0.0213241	0.0377321	-4.03717
Apex2	-0.835708	5.32498	-8.31288	1.37e-05	0.000274088	3.60491
Cfb	-0.834683	5.87711	-9.78879	3.47e-06	0.00016428	5.01599
Ctsll3	-0.834264	4.39708	-11.0049	1.27e-06	0.000120915	6.03499
Nf2	-0.834214	6.59204	-7.43303	3.4e-05	0.000427774	2.65629
Rragd	-0.833299	3.82964	-7.28985	3.98e-05	0.000463231	2.49342
Dcaf5	-0.833047	5.84125	-6.06302	0.000167143	0.00103951	0.990466
Asb18	-0.832469	5.00483	-6.01821	0.000176765	0.00107576	0.931727
1110008F13Rik	-0.832396	9.62876	-7.36291	3.67e-05	0.00044513	2.57683
Mpc1	-0.832348	10.369	-2.73017	0.0226498	0.0396052	-4.09745
Lsg1	-0.831728	5.81172	-9.59614	4.11e-06	0.00017407	4.84337
Uqcc1	-0.831565	8.18912	-6.33597	0.000119533	0.000862648	1.3422
Idh1	-0.831292	7.26349	-3.27283	0.0092854	0.019146	-3.19611
Tmem35	-0.831289	6.06436	-7.2047	4.37e-05	0.000484206	2.39537
Etv5	-0.830776	5.17744	-5.49849	0.000345029	0.00164545	0.229662
Zmynd10	-0.830766	5.97374	-8.79131	8.59e-06	0.000224586	4.0855
Gstz1	-0.83072	6.11245	-6.8797	6.3e-05	0.000598943	2.01283
Ctc1	-0.830678	5.63045	-12.4923	4.2e-07	7.53e-05	7.13535
Tcap	-0.830647	11.2617	-2.42609	0.0375199	0.060544	-4.59694
Txnrd2	-0.830644	7.01842	-5.48029	0.000353445	0.00166972	0.204366
Scrn2	-0.830476	5.5528	-8.22275	1.5e-05	0.000286246	3.51169
Mtfr1	-0.829947	5.91769	-8.35116	1.32e-05	0.000267201	3.64423
Sun1	-0.829827	7.6913	-5.99737	0.000181442	0.00109469	0.904316
Gpx3	-0.829438	10.5584	-5.73232	0.000254212	0.00135166	0.550319
Trpc5	-0.828609	4.76277	-7.26111	4.11e-05	0.000468491	2.46043
Arhgef2	-0.8286	6.8003	-7.73971	2.46e-05	0.00036779	2.99694
Tg	-0.828397	5.66172	-7.40216	3.52e-05	0.000433778	2.62138
Pptc7	-0.828247	8.99865	-5.56833	0.000314696	0.00155197	0.326257
Omd	-0.828107	5.15627	-9.86528	3.25e-06	0.000160764	5.08364
P2ry4	-0.827743	5.94798	-9.97721	2.95e-06	0.000157736	5.18173
Golph3	-0.827723	6.72918	-5.02255	0.000657922	0.00254314	-0.447502
Slc19a3	-0.827503	4.73307	-8.55588	1.08e-05	0.000249197	3.85194
Cables2	-0.827275	6.98726	-6.68888	7.86e-05	0.000680781	1.78193
Chrna7	-0.827082	5.28854	-8.57706	1.06e-05	0.000247198	3.87318
Vil1	-0.826974	5.14152	-6.82348	6.72e-05	0.000624248	1.9453
Mns1	-0.826809	4.11769	-11.3163	9.97e-07	0.000111062	6.27775
Ivns1abp	-0.82678	7.93069	-3.52346	0.00620266	0.0139011	-2.78256
Eif2b5	-0.826549	8.00606	-5.79368	0.000234922	0.00128039	0.633164
C79329	-0.825772	4.45101	-7.02906	5.32e-05	0.000542645	2.19029
Gnaq	-0.825422	5.63114	-6.66921	8.04e-05	0.000690248	1.75786
Gata6	-0.824843	7.9701	-4.73793	0.000983004	0.00341578	-0.868123
Gp1ba	-0.824655	5.0026	-5.81927	0.000227351	0.00125485	0.667554
Ager	-0.824217	6.18425	-9.0654	6.64e-06	0.000204915	4.35048
Spp2	-0.823836	4.7492	-6.92499	5.98e-05	0.00058102	2.06694
Ptpra	-0.823637	7.30806	-5.24222	0.000486471	0.00206623	-0.130871
Cux2	-0.823447	5.24804	-9.22113	5.76e-06	0.000194072	4.49781
Tceanc2	-0.822631	5.3066	-11.9179	6.35e-07	9.52e-05	6.72771
Katnbl1	-0.822592	4.91561	-7.79318	2.32e-05	0.000359361	3.05521
Nap1l3	-0.822479	3.77786	-11.6679	7.64e-07	0.000102728	6.5437
Stam	-0.822188	5.63202	-8.95513	7.36e-06	0.000212636	4.24475
Taf1b	-0.822059	5.79731	-6.39784	0.000110933	0.000826006	1.4205
Kptn	-0.821337	6.47992	-10.4826	1.93e-06	0.000132932	5.61173
Abat	-0.821269	4.12582	-8.62737	1.01e-05	0.000241374	3.92346
Yes1	-0.821031	4.69282	-7.82189	2.25e-05	0.000354514	3.08635
Casp12	-0.820618	5.04942	-8.39733	1.26e-05	0.000264296	3.69146
Akr1e1	-0.820099	7.41962	-10.3739	2.11e-06	0.00013645	5.52097
Tm7sf2	-0.819633	6.73463	-10.8225	1.47e-06	0.000127608	5.88952
Klk4	-0.819293	5.29639	-8.28299	1.41e-05	0.000279376	3.57409
Extl1	-0.819268	5.97447	-4.13446	0.00239383	0.00662453	-1.79719
Dlat	-0.818822	9.15658	-4.04258	0.00275365	0.00733502	-1.94278
Rad51d	-0.818189	5.61701	-10.6768	1.65e-06	0.00013088	5.77153
Bicd1	-0.817823	4.32191	-11.6245	7.89e-07	0.000102934	6.51135
Fbxw4	-0.817529	7.51478	-8.25112	1.45e-05	0.000283622	3.54112
Ssu72	-0.81752	8.44679	-7.0037	5.47e-05	0.000551498	2.16036
Large	-0.817341	6.63502	-8.61241	1.02e-05	0.000242643	3.90853
Hbp1	-0.817084	7.55942	-4.8453	0.000843677	0.00305193	-0.708091
Pbx3	-0.815729	6.80048	-6.08607	0.000162416	0.00102397	1.02057
Prkcq	-0.815554	6.3916	-8.19562	1.54e-05	0.000291158	3.48345
Ehd2	-0.815416	6.05099	-6.65345	8.19e-05	0.000694755	1.73854
Tgfbr2	-0.815408	6.25982	-7.37794	3.61e-05	0.000440766	2.59392
Smap2	-0.815058	6.74368	-6.34964	0.000117573	0.000854647	1.35954
Pcdhb13	-0.81481	4.74324	-10.449	1.99e-06	0.000132932	5.58377
Tcl1	-0.814739	6.01615	-7.99175	1.89e-05	0.000326749	3.26876
Hibch	-0.81449	5.83094	-6.18437	0.000143827	0.000956011	1.14812
Ldb3	-0.814233	9.36923	-6.81948	6.75e-05	0.000624968	1.94048
Spg7	-0.813612	7.80876	-6.69387	7.81e-05	0.00067773	1.78803
Calml4	-0.813028	4.45941	-8.762	8.83e-06	0.000226024	4.05672
Arl2bp	-0.813011	8.41377	-4.0371	0.00277686	0.00737721	-1.9515
Mgea5	-0.81295	6.94707	-6.42241	0.000107707	0.000816118	1.45145
Tsc22d3	-0.812862	7.69984	-3.85044	0.0037042	0.00922727	-2.25042
Gtf3c5	-0.812801	5.99137	-5.52101	0.000334918	0.00161474	0.260882
Erich3	-0.812646	5.65325	-7.59546	2.86e-05	0.000395221	2.83809
Aldh6a1	-0.812321	7.71982	-2.58822	0.0286661	0.048275	-4.33175
Rfk	-0.811888	7.80326	-4.63761	0.00113563	0.00376372	-1.01914
St3gal2	-0.811839	6.02667	-7.28858	3.99e-05	0.000463468	2.49196
AU016916	-0.811731	4.64099	-6.32255	0.000121493	0.000869281	1.32515
Gtf2i	-0.811694	6.43429	-8.0435	1.79e-05	0.00031792	3.3237
Mob3b	-0.810898	4.9839	-7.74243	2.45e-05	0.00036779	2.99991
Aurka	-0.810846	5.39332	-7.87828	2.13e-05	0.000346199	3.14727
Rnf13	-0.810824	7.34533	-4.18165	0.00222873	0.00628381	-1.72282
Snx14	-0.810644	5.22584	-7.93557	2e-05	0.000334988	3.20879
Sema6d	-0.810141	6.60419	-4.65545	0.00110674	0.00369329	-0.992182
Ttc4	-0.810115	5.56874	-6.63039	8.41e-05	0.000703808	1.71021
Dvl3	-0.810076	6.02271	-6.90216	6.14e-05	0.000591081	2.0397
Klhl7	-0.810075	6.6036	-3.66414	0.00496085	0.0116399	-2.55241
Mcpt2	-0.809757	6.27899	-6.19644	0.000141708	0.000949909	1.16369
Aqp4	-0.808804	4.76814	-3.85344	0.00368694	0.00919304	-2.24558
Eif3m	-0.808571	5.84499	-9.7018	3.74e-06	0.000170814	4.93844
Snn	-0.808259	5.13794	-8.64143	9.92e-06	0.00023916	3.93747
Ank1	-0.808108	7.63012	-3.98985	0.00298565	0.00781166	-2.02679
Strc	-0.808103	5.44675	-5.53215	0.000330036	0.00160205	0.276298
Tmem144	-0.808054	7.45238	-6.01357	0.000177793	0.00108	0.925637
Mme	-0.807989	4.59311	-8.56523	1.07e-05	0.000248497	3.86132
Dyrk1a	-0.807826	6.76304	-4.69862	0.00104002	0.00354777	-0.927133
Rorc	-0.807181	5.45699	-6.67109	8.02e-05	0.000689587	1.76016
Rbm6	-0.807001	7.18826	-9.63752	3.96e-06	0.000173423	4.88072
Krt75	-0.80627	5.32205	-6.81153	6.82e-05	0.000629825	1.93089
Itih2	-0.805778	5.29646	-10.9051	1.37e-06	0.000124469	5.95572
Ephx1	-0.805446	7.2113	-2.98956	0.0147539	0.0278353	-3.6667
Klra17	-0.805442	4.80231	-9.24244	5.65e-06	0.000192123	4.51779
Sln	-0.805182	5.73053	-7.44034	3.38e-05	0.00042709	2.66454
Olig1	-0.805092	4.62875	-7.53488	3.05e-05	0.000406654	2.77065
Tekt2	-0.804949	4.93998	-9.86296	3.25e-06	0.000160764	5.0816
Gp5	-0.804756	5.1009	-6.25449	0.000131982	0.000907805	1.23828
3632451O06Rik	-0.803972	5.0601	-6.8943	6.2e-05	0.000593782	2.03031
Avil	-0.803673	5.70892	-6.67632	7.97e-05	0.000687089	1.76656
Cops7a	-0.803498	7.55522	-9.21383	5.79e-06	0.000194515	4.49095
Chchd5	-0.803353	4.88773	-11.0097	1.26e-06	0.000120915	6.03879
Isoc1	-0.803328	7.05872	-4.16796	0.00227534	0.00637667	-1.74437
Lims1	-0.803247	7.89249	-5.57937	0.000310168	0.00153823	0.341471
Gulo	-0.803204	4.3148	-7.1347	4.73e-05	0.00050611	2.3141
Ctdnep1	-0.80317	8.43861	-8.90703	7.7e-06	0.000216406	4.19826
Cox8c	-0.802939	8.37431	-5.76433	0.000243943	0.00131419	0.593607
Sspn	-0.8028	8.12587	-3.96093	0.0031216	0.00809754	-2.07301
Ckap2	-0.802642	5.35906	-6.88319	6.28e-05	0.000597866	2.01701
G0s2	-0.801841	7.90527	-2.49845	0.033274	0.0547765	-4.47897
Klk1b11	-0.801533	5.42221	-9.16785	6.04e-06	0.000196424	4.44765
Gatsl2	-0.801479	6.21115	-6.10732	0.000158188	0.0010089	1.04825
Camk2a	-0.800154	3.88281	-8.47701	1.16e-05	0.000255027	3.77244
Reg3b	-0.799859	4.7223	-7.89727	2.08e-05	0.000342428	3.1677
Plekha2	-0.79982	7.53539	-6.57577	8.97e-05	0.000732239	1.64281
Rad54l2	-0.799743	7.74424	-7.30171	3.93e-05	0.000460306	2.507
Vcl	-0.798896	7.95941	-3.10693	0.0121685	0.0238114	-3.4715
Zbtb46	-0.79881	5.16038	-8.29145	1.4e-05	0.000278704	3.58281
Cxxc1	-0.798633	6.3461	-8.81013	8.44e-06	0.000223276	4.10393
Tmem38b	-0.798565	7.53995	-5.03621	0.000645553	0.00251213	-0.427605
Pvalb	-0.79835	5.6868	-8.72966	9.11e-06	0.000226279	4.02488
Nfia	-0.798193	4.54147	-10.1134	2.63e-06	0.000148654	5.29966
Rnf5	-0.797997	7.78621	-7.08619	4.99e-05	0.000521542	2.25742
Ptgds	-0.797792	11.0122	-3.92753	0.00328676	0.008404	-2.1265
Gstk1	-0.796811	8.86147	-3.66792	0.00493133	0.0116019	-2.54625
Acvrl1	-0.796575	7.13686	-8.27135	1.43e-05	0.000280064	3.56206
Dnajc5	-0.796554	7.16071	-10.9295	1.35e-06	0.000124427	5.97515
Npy6r	-0.796316	4.75817	-4.90247	0.000778262	0.00287507	-0.623546
Pla2g16	-0.796164	8.08945	-3.02231	0.0139803	0.026661	-3.61222
Fam20b	-0.79603	7.0833	-6.12813	0.000154162	0.000992845	1.0753
Pip	-0.795928	4.26207	-8.48306	1.16e-05	0.000254772	3.77856
Arap2	-0.795724	6.59118	-7.79764	2.31e-05	0.000358286	3.06005
Dnajb12	-0.794913	6.79825	-9.09028	6.49e-06	0.000202975	4.37416
Aspn	-0.794677	3.75687	-9.09872	6.44e-06	0.000202975	4.38219
Tbx21	-0.794521	4.36066	-9.17472	6.01e-06	0.000196424	4.45414
Mxi1	-0.794372	7.64727	-3.51	0.00633743	0.0141545	-2.80466
Glra4	-0.793735	5.30275	-7.03112	5.31e-05	0.000541808	2.19272
Gprc6a	-0.793691	6.63669	-5.56356	0.000316671	0.00155804	0.319689
Lap3	-0.793668	8.03746	-6.66042	8.12e-05	0.000693465	1.74708
Heatr2	-0.793664	5.31361	-9.50951	4.44e-06	0.000178788	4.76467
Tmbim4	-0.793399	8.83631	-4.09888	0.00252689	0.00687466	-1.85346
Eme1	-0.793273	5.90644	-7.70882	2.54e-05	0.000371349	2.96312
Nr2e3	-0.793134	5.75294	-6.14384	0.000151195	0.000982957	1.0957
Acox3	-0.793112	5.17715	-4.89372	0.000787916	0.00290121	-0.636462
Dmpk	-0.792962	8.59253	-3.44816	0.00699708	0.0153021	-2.90639
Olfr67	-0.792842	4.99323	-6.16515	0.000147271	0.000971916	1.12329
Ndufs2	-0.79248	11.8263	-3.81384	0.00392165	0.00964739	-2.30948
Marco	-0.792456	5.08924	-9.31719	5.27e-06	0.000188141	4.58755
Ftmt	-0.792164	4.59399	-8.68542	9.51e-06	0.000232522	3.98115
Nepn	-0.792001	5.09432	-10.7948	1.5e-06	0.000128746	5.86722
Pm20d1	-0.791922	4.86425	-8.01243	1.85e-05	0.000323333	3.29075
Mgst1	-0.791879	7.23066	-4.4711	0.00144767	0.00448035	-1.27287
Mybpc3	-0.791831	12.2399	-2.38292	0.0403042	0.0643762	-4.66697
Sbk1	-0.791089	6.05996	-3.28081	0.00916601	0.0189477	-3.18289
Nov	-0.791077	4.41735	-6.06545	0.000166638	0.00103785	0.993638
Plgrkt	-0.790382	5.08306	-6.44119	0.000105308	0.00080827	1.47506
Mtx2	-0.790377	7.73193	-3.97754	0.00304273	0.00791972	-2.04645
Htr1d	-0.790248	5.73251	-6.99677	5.52e-05	0.000553876	2.15216
Rora	-0.790112	6.49274	-3.9152	0.00335002	0.00853564	-2.14626
Odf3	-0.789904	5.25289	-7.8144	2.27e-05	0.000355439	3.07825
Coq3	-0.78988	6.98176	-6.09441	0.000160742	0.0010175	1.03145
Lhb	-0.789368	5.7002	-7.02222	5.36e-05	0.000544348	2.18223
Clpb	-0.788988	6.25557	-7.42782	3.42e-05	0.000427774	2.65041
Aatk	-0.788117	6.00968	-7.39933	3.53e-05	0.000434373	2.61818
Elovl7	-0.787317	4.43336	-10.4537	1.98e-06	0.000132932	5.58764
Ttc3	-0.787214	7.02045	-5.6974	0.000265951	0.00139362	0.50293
Arl8b	-0.787108	6.99951	-5.00886	0.000670578	0.00257569	-0.467476
Cfd	-0.786478	6.2403	-2.10483	0.0637677	0.0950905	-5.10986
Wdr26	-0.786298	6.19353	-4.15678	0.00231418	0.00645614	-1.76198
Nkx3-1	-0.786235	6.1654	-5.85798	0.000216397	0.00121587	0.719389
Nfic	-0.786202	7.10612	-6.03656	0.000172754	0.00106227	0.955812
Crygd	-0.785881	5.49756	-10.7104	1.6e-06	0.00013088	5.79889
Zfp386	-0.785728	4.85766	-5.25343	0.000479124	0.00204435	-0.114905
Il18	-0.785318	5.19633	-8.14405	1.62e-05	0.000299849	3.42958
Ap5s1	-0.785315	7.07407	-5.21247	0.000506571	0.00211789	-0.173347
Sp3	-0.784668	4.02277	-6.27742	0.000128342	0.000893566	1.26762
Serpina6	-0.784648	4.65429	-10.7611	1.54e-06	0.00013088	5.83995
Vwa8	-0.784572	5.80055	-6.11492	0.000156704	0.00100426	1.05814
Nme5	-0.784537	4.97294	-6.06763	0.000166186	0.00103699	0.996489
Gja8	-0.784375	5.2841	-7.17236	4.53e-05	0.000493387	2.3579
Alpk3	-0.784369	9.67728	-7.84048	2.21e-05	0.000353022	3.10648
1700080E11Rik	-0.784279	5.68334	-5.00032	0.0006786	0.00259583	-0.479942
Gpx5	-0.783985	5.87661	-8.44572	1.2e-05	0.000257404	3.74071
Epha4	-0.783756	5.37419	-8.06328	1.76e-05	0.000315872	3.34462
Rhd	-0.78329	6.72989	-6.05052	0.000169768	0.00104983	0.974112
Rab12	-0.783253	9.15986	-4.26413	0.00196848	0.00570391	-1.59349
Flt3	-0.783171	7.58069	-6.74368	7.37e-05	0.000657944	1.84872
Mrgpra3	-0.783029	6.81173	-7.65802	2.68e-05	0.000379974	2.90727
Capn1	-0.78289	6.67337	-11.3048	1.01e-06	0.000111062	6.26893
Park2	-0.782717	5.34729	-8.12236	1.66e-05	0.0003043	3.40683
Zfp106	-0.782637	6.7109	-5.98056	0.000185311	0.00110728	0.882168
Epn2	-0.782553	6.56344	-6.34695	0.000117956	0.00085672	1.35613
Rprm	-0.782348	5.23832	-10.5828	1.78e-06	0.000131423	5.69455
Spryd7	-0.781587	7.56599	-4.07011	0.00264018	0.00709705	-1.89905
Leprotl1	-0.781171	6.68825	-4.57844	0.00123738	0.00400213	-1.10886
Slc30a1	-0.781113	6.68025	-8.61123	1.02e-05	0.000242643	3.90736
Orc1	-0.781099	4.4235	-9.65677	3.9e-06	0.000173423	4.89805
Nf1	-0.781081	5.5661	-6.66403	8.09e-05	0.000693018	1.75151
Dbt	-0.780972	6.46733	-6.13158	0.000153506	0.000992046	1.07978
Sval1	-0.780449	3.85814	-7.64966	2.7e-05	0.000381278	2.89805
Trappc13	-0.780067	4.6232	-3.44445	0.00703886	0.0153635	-2.9125
Barx2	-0.77996	5.46085	-9.23905	5.66e-06	0.000192123	4.51461
Pip4k2c	-0.779695	7.37389	-6.23914	0.000134482	0.000918567	1.21859
Acadvl	-0.77957	11.6844	-5.17521	0.000533012	0.00219254	-0.226718
Slco1a4	-0.779458	7.00482	-6.49662	9.86e-05	0.000775669	1.54445
Ash2l	-0.779382	6.56932	-9.53809	4.33e-06	0.000178623	4.79071
Apip	-0.778309	8.79299	-4.19149	0.00219584	0.00620696	-1.70734
Cd28	-0.778165	5.14833	-12.399	4.49e-07	7.62e-05	7.07058
Zfp574	-0.776329	6.48436	-8.15858	1.6e-05	0.000298745	3.44479
Art4	-0.77509	4.92722	-5.89038	0.000207664	0.00118634	0.762629
Scara5	-0.774973	6.57825	-2.79397	0.0203776	0.0363471	-3.99172
Clk4	-0.774495	5.44724	-5.84825	0.000219095	0.00122273	0.706383
Arpp21	-0.774248	4.62157	-10.3908	2.08e-06	0.000135899	5.53515
Scd1	-0.774228	5.79856	-4.76413	0.000946869	0.00332305	-0.828919
Cnot6l	-0.7742	6.5572	-8.27154	1.42e-05	0.000280064	3.56226
Dnajc17	-0.773863	5.1673	-8.25765	1.44e-05	0.000283065	3.54789
Ccsap	-0.773472	5.82997	-9.66484	3.87e-06	0.000173423	4.9053
Olfr15	-0.773371	5.66326	-8.35787	1.31e-05	0.000267201	3.65111
Tctn3	-0.772916	5.72782	-10.7955	1.5e-06	0.000128746	5.86775
Psmb7	-0.772881	10.8741	-5.10184	0.000589528	0.00235956	-0.332414
Agr3	-0.772838	4.53235	-9.50895	4.44e-06	0.000178788	4.76416
Pja2	-0.772804	6.46593	-5.08031	0.000607305	0.00240854	-0.363567
Mms22l	-0.772701	5.28049	-9.27482	5.48e-06	0.000192123	4.54807
Slc27a1	-0.772415	7.8135	-3.77617	0.00415946	0.0100991	-2.37039
Vrk1	-0.772086	4.33534	-8.38175	1.28e-05	0.000264312	3.67555
Sh3glb2	-0.771952	7.43344	-5.36654	0.000411316	0.00184301	0.0452195
Kdm5d	-0.771886	4.65737	-8.05208	1.78e-05	0.000317613	3.33278
Apon	-0.771861	5.69483	-7.99267	1.89e-05	0.000326749	3.26974
BC005537	-0.77132	6.68378	-5.31988	0.000437944	0.00192985	-0.0206096
Ccdc97	-0.771294	7.08707	-7.87219	2.14e-05	0.000346199	3.14072
C76332	-0.770839	3.66865	-9.39471	4.92e-06	0.000183859	4.65935
Pip5kl1	-0.770792	4.23563	-5.97471	0.000186679	0.0011097	0.874449
Dazl	-0.770772	4.74958	-8.03012	1.82e-05	0.000320294	3.30952
Fut10	-0.770547	6.04148	-6.96594	5.71e-05	0.000563406	2.11565
Ndufs1	-0.770448	10.9433	-3.68495	0.00480061	0.0113517	-2.51852
Chrna3	-0.770397	5.59002	-7.44754	3.35e-05	0.000425842	2.67266
Igfbp4	-0.770368	8.59509	-3.61966	0.0053226	0.0123181	-2.625
Abcb7	-0.770041	5.39604	-6.85018	6.52e-05	0.000611539	1.97742
Nprl2	-0.769979	6.38335	-7.97413	1.93e-05	0.000329296	3.24999
Cast	-0.769862	7.10889	-6.86847	6.38e-05	0.000603617	1.99938
Cmya5	-0.769405	10.6447	-2.39729	0.0393559	0.0630312	-4.6437
AI317395	-0.769269	4.07048	-7.79785	2.31e-05	0.000358286	3.06028
Spta1	-0.769001	4.87587	-7.6735	2.63e-05	0.000376856	2.92432
Usp8	-0.76873	7.17438	-4.12819	0.00241672	0.00666103	-1.80709
Wls	-0.76865	6.16838	-6.9652	5.72e-05	0.000563455	2.11476
Zfp672	-0.76832	6.81324	-4.53866	0.00131125	0.0041689	-1.16947
Sucla2	-0.76792	11.0007	-4.1094	0.00248673	0.00680227	-1.83679
Ryr3	-0.767794	5.49963	-7.0468	5.21e-05	0.00053484	2.21118
Olfr154	-0.767674	5.96598	-6.31596	0.000122468	0.000872725	1.31676
Art5	-0.767665	5.98578	-5.76259	0.00024449	0.00131551	0.591258
Cisd1	-0.767486	9.61141	-4.00837	0.00290191	0.00763234	-1.99725
Ckap5	-0.7674	7.46631	-5.61096	0.000297606	0.00149643	0.384873
Iqcc	-0.767382	7.2428	-7.29322	3.97e-05	0.000462234	2.49728
Sulf2	-0.767209	7.91656	-5.67951	0.00027219	0.00141607	0.478587
Ptpmt1	-0.766687	7.68447	-7.01549	5.4e-05	0.00054759	2.17428
Rab10	-0.766576	8.26853	-5.19339	0.000519928	0.00215772	-0.200648
Cdcp1	-0.766098	4.80924	-7.07928	5.03e-05	0.000523616	2.24933
Zfp943	-0.766003	4.01752	-7.30646	3.91e-05	0.000459378	2.51244
Drd3	-0.765943	4.56045	-8.33035	1.34e-05	0.000271042	3.62287
Ddo	-0.765932	5.6346	-5.89359	0.000206821	0.00118464	0.766899
Trpc2	-0.764592	4.01799	-8.01286	1.85e-05	0.000323333	3.29121
Tomm40	-0.764564	7.95889	-5.38725	0.000400062	0.00181353	0.074332
Smc1b	-0.764315	5.79013	-6.10646	0.000158356	0.0010089	1.04714
Cep112	-0.764248	4.58723	-11.3703	9.56e-07	0.000111062	6.31915
Lrrc3b	-0.763851	7.45001	-6.09495	0.000160634	0.0010175	1.03215
Tuba8	-0.763351	8.94066	-2.56967	0.0295629	0.0494903	-4.36224
Tmem60	-0.763326	7.38744	-4.07343	0.00262683	0.00706989	-1.89378
Crybb3	-0.763198	6.64107	-8.22905	1.49e-05	0.000285495	3.51823
S1pr3	-0.76314	5.88896	-2.80915	0.0198719	0.035592	-3.96653
Tmem163	-0.762876	5.1407	-9.13791	6.21e-06	0.000199665	4.41936
Gpr83	-0.762746	5.60436	-7.78962	2.33e-05	0.000360182	3.05134
Nmnat1	-0.762569	4.86274	-7.672	2.64e-05	0.000376856	2.92268
Snap91	-0.762354	5.02531	-7.09294	4.95e-05	0.000519696	2.26532
Epb4.1	-0.762194	7.69902	-2.70836	0.0234839	0.0408449	-4.13355
Etfa	-0.761845	11.1142	-2.85302	0.0184808	0.0334125	-3.89369
Parl	-0.761421	7.8215	-4.12759	0.00241895	0.00666579	-1.80805
Tmem245	-0.761005	6.11989	-4.38611	0.00164116	0.00494661	-1.40384
Mms19	-0.760967	6.39144	-7.49501	3.18e-05	0.000416355	2.72603
Col12a1	-0.760906	6.80868	-7.49313	3.19e-05	0.000416364	2.72392
Ms4a10	-0.760834	6.1522	-4.37242	0.00167483	0.00502681	-1.42503
Zfp639	-0.760811	7.47836	-8.85372	8.1e-06	0.000220596	4.14648
Apbb1	-0.760602	9.15673	-3.49155	0.00652724	0.0144892	-2.83499
Nr1h3	-0.759853	6.42552	-6.007	0.000179263	0.0010859	0.916996
Vmn1r25	-0.759736	4.22729	-9.79463	3.45e-06	0.00016428	5.02118
Onecut1	-0.75964	4.68835	-7.90976	2.06e-05	0.000339747	3.18113
Atp2c1	-0.759633	6.04343	-4.15471	0.00232144	0.00647225	-1.76524
Gfi1b	-0.759066	5.87162	-6.27341	0.00012897	0.000895108	1.2625
LOC102631579	-0.75902	5.37097	-9.10269	6.42e-06	0.000202975	4.38596
Bves	-0.758742	8.3998	-5.43148	0.000377122	0.00174245	0.136309
Plekhb2	-0.75846	9.22935	-3.39292	0.00764686	0.0164322	-2.99747
Spc25	-0.758237	4.97111	-8.48171	1.16e-05	0.000254772	3.7772
D17892	-0.758151	6.86624	-6.1508	0.000149903	0.000978945	1.1047
Brd3	-0.758055	6.45578	-9.35042	5.12e-06	0.000187641	4.6184
Ctsw	-0.757722	6.73984	-7.93331	2.01e-05	0.000334988	3.20637
Cbr2	-0.7576	6.44373	-4.41955	0.00156193	0.00475501	-1.35219
Gm15498	-0.757509	4.45177	-9.94705	3.03e-06	0.000159254	5.1554
Josd2	-0.757466	7.45931	-3.79168	0.00405979	0.00991245	-2.3453
Chgb	-0.757346	4.3402	-8.59937	1.03e-05	0.000243817	3.89552
Poll	-0.756911	5.43781	-8.59317	1.04e-05	0.000244689	3.88931
Cldn16	-0.75673	5.68725	-6.31685	0.000122335	0.000872675	1.3179
Crip3	-0.756554	4.46391	-9.23502	5.68e-06	0.000192123	4.51083
Axl	-0.756445	6.41155	-4.22122	0.00209958	0.00599067	-1.66066
Atp5b	-0.756346	12.7228	-3.85892	0.00365563	0.00914119	-2.23675
Tbx20	-0.756073	5.6534	-6.95476	5.79e-05	0.000566481	2.10237
Slc25a53	-0.755826	6.66643	-6.01887	0.000176618	0.00107536	0.9326
Bace1	-0.75578	6.96026	-7.02575	5.34e-05	0.000543398	2.18639
Slc17a3	-0.755748	4.83082	-7.62893	2.76e-05	0.000386402	2.87516
Prl8a2	-0.755726	4.94999	-7.28591	4e-05	0.000464	2.4889
Khk	-0.755689	7.19365	-9.16102	6.08e-06	0.000196433	4.44121
Pdxdc1	-0.755602	6.65875	-5.61051	0.000297781	0.00149643	0.384256
Rbbp6	-0.755375	4.64582	-8.56339	1.07e-05	0.000248497	3.85948
Adck3	-0.755355	6.78852	-3.52778	0.00616007	0.0138294	-2.77547
Rnf112	-0.755204	4.99124	-10.7256	1.59e-06	0.00013088	5.81125
Ccdc137	-0.755061	7.46648	-7.7481	2.43e-05	0.00036779	3.0061
Kcna6	-0.755021	5.69583	-5.99265	0.00018252	0.00109899	0.898101
Tecr	-0.754774	11.0464	-2.4588	0.035538	0.0579118	-4.54371
Fam134c	-0.754639	6.7212	-8.28195	1.41e-05	0.000279376	3.57301
Anxa13	-0.754539	4.28404	-8.01932	1.84e-05	0.000322283	3.29807
Gjb2	-0.754234	5.4219	-5.67712	0.000273034	0.00141878	0.475336
Mnx1	-0.754015	4.26398	-8.45878	1.18e-05	0.000255811	3.75397
Gm11944	-0.75378	4.3131	-8.93317	7.51e-06	0.000215026	4.22355
Jam2	-0.753384	6.64607	-5.94451	0.000193918	0.00113515	0.834516
Sepsecs	-0.753378	5.51797	-9.45432	4.66e-06	0.000182653	4.71419
Pmpca	-0.753358	8.62061	-6.55497	9.2e-05	0.000743492	1.61705
Zscan22	-0.753197	7.01419	-5.5311	0.000330492	0.00160367	0.274848
Celsr2	-0.753102	6.25197	-6.27831	0.000128204	0.000893566	1.26875
Il10	-0.752748	4.56771	-9.81167	3.4e-06	0.000163799	5.03628
Krtap19-1	-0.752463	5.21516	-8.04578	1.79e-05	0.000317613	3.32611
Ctnna2	-0.75233	4.64352	-7.69154	2.58e-05	0.000374077	2.94416
Eln	-0.752291	7.50033	-7.46172	3.3e-05	0.00042385	2.68863
Prodh	-0.752219	6.92514	-6.11691	0.000156318	0.00100277	1.06073
Akap8l	-0.752149	7.0667	-4.612	0.00117852	0.00386755	-1.05791
Il17rd	-0.751775	6.08287	-9.00831	7.01e-06	0.000209016	4.29588
Stard10	-0.75139	7.84337	-7.06303	5.12e-05	0.00052787	2.23026
Abr	-0.75136	5.1166	-8.51197	1.12e-05	0.000251945	3.80776
Cmtm8	-0.751108	7.01416	-3.78607	0.00409552	0.00997729	-2.35436
Eltd1	-0.751096	8.30401	-2.99853	0.0145376	0.0274987	-3.65177
Krt23	-0.750545	5.89509	-9.54277	4.31e-06	0.000178623	4.79497
Trak1	-0.750366	7.22437	-4.59892	0.0012011	0.00391769	-1.07775
Mfsd7c	-0.7503	5.36753	-5.21221	0.000506747	0.00211789	-0.173711
Usp9x	-0.74995	5.03349	-6.53204	9.45e-05	0.000756018	1.58856
Vmn1r53	-0.74968	5.05018	-8.16033	1.59e-05	0.000298646	3.44662
Meox2	-0.749435	4.25355	-5.52285	0.000334105	0.00161276	0.263435
Ahrr	-0.749219	4.23659	-7.14798	4.66e-05	0.000501627	2.32957
Pcsk6	-0.749035	6.63845	-4.51441	0.00135856	0.00427143	-1.2065
C330007P06Rik	-0.748934	5.78154	-10.6584	1.67e-06	0.000131423	5.75646
Jagn1	-0.748925	7.54681	-4.4381	0.00151974	0.00465794	-1.3236
Ccr3	-0.748686	4.42726	-5.51296	0.000338494	0.00162529	0.249735
Fam118b	-0.74865	4.32124	-9.44794	4.69e-06	0.000182963	4.70833
Nit2	-0.748586	6.39586	-3.97927	0.00303466	0.00790501	-2.0437
Chd6	-0.748269	6.82895	-2.40873	0.0386158	0.0620439	-4.62513
Serpina1c	-0.748241	5.76215	-5.67988	0.00027206	0.00141607	0.479089
Pmfbp1	-0.748114	6.90397	-8.72844	9.12e-06	0.000226279	4.02368
Rere	-0.747995	8.62933	-5.29665	0.00045189	0.00196804	-0.0535038
Aurkaip1	-0.747788	9.21728	-5.74385	0.00025046	0.0013388	0.565928
Slamf7	-0.747593	4.72983	-7.30543	3.91e-05	0.000459482	2.51126
Nek2	-0.747556	4.90728	-10.9143	1.36e-06	0.000124427	5.96307
Homer2	-0.74745	8.44944	-4.10986	0.00248499	0.00679893	-1.83607
Dnm1l	-0.747219	6.04669	-6.08447	0.00016274	0.00102397	1.01848
Krtap19-3	-0.747121	3.76227	-10.5206	1.87e-06	0.000132893	5.64318
Gm11567	-0.74702	4.8833	-6.39104	0.000111844	0.000830385	1.41192
Slc27a2	-0.746978	5.06849	-6.70882	7.68e-05	0.000670476	1.80629
Ddx51	-0.746846	6.72432	-9.0757	6.58e-06	0.000203452	4.36029
Tmed8	-0.746409	6.13998	-7.64167	2.72e-05	0.00038286	2.88924
Tmem8c	-0.74626	5.31529	-7.72434	2.5e-05	0.000369279	2.98012
Zfp277	-0.746257	6.3948	-5.88741	0.000208451	0.00118875	0.758662
Ipp	-0.746217	5.5165	-7.67953	2.62e-05	0.000375516	2.93096
4930535I16Rik	-0.74596	6.16259	-6.67588	7.98e-05	0.000687089	1.76603
Aqp1	-0.745767	10.1148	-1.91372	0.0870353	0.12444	-5.40317
Mov10l1	-0.745757	7.15865	-3.26916	0.00934085	0.0192299	-3.20219
D1Ertd259e	-0.745466	6.67401	-6.40173	0.000110414	0.000825912	1.42541
Nr3c1	-0.745277	6.71073	-7.6478	2.71e-05	0.000381615	2.89601
Vtn	-0.745258	6.68292	-5.09252	0.000597155	0.00238059	-0.345894
Siglece	-0.745192	5.67905	-7.85656	2.17e-05	0.000350032	3.12385
Bpifa2	-0.745066	4.70568	-5.66319	0.00027802	0.00143953	0.456339
Agxt	-0.745036	5.4561	-7.39916	3.53e-05	0.000434373	2.61798
Prrt1	-0.745015	6.5986	-6.94603	5.84e-05	0.000570683	2.09199
Homer1	-0.74466	4.98554	-6.96841	5.7e-05	0.000562257	2.11857
Clec14a	-0.744519	5.04628	-7.0758	5.05e-05	0.000524698	2.24524
2310067B10Rik	-0.744063	7.76886	-7.09532	4.94e-05	0.000519145	2.26811
Fbxo16	-0.743994	5.33075	-7.8311	2.23e-05	0.000353827	3.09633
1810011O10Rik	-0.743877	7.13095	-4.69725	0.00104208	0.00355013	-0.929195
Fbln5	-0.743343	7.18053	-4.75157	0.000964021	0.00337168	-0.847711
Mapk9	-0.743254	6.20011	-7.45702	3.32e-05	0.00042385	2.68333
Sh2d2a	-0.743225	7.45632	-6.62039	8.51e-05	0.000709838	1.69789
Rapgef6	-0.742717	5.9428	-6.0767	0.000164321	0.0010303	1.00833
Rnf128	-0.742678	8.45198	-3.45401	0.0069318	0.0151934	-2.89676
Spata4	-0.742311	5.3717	-7.72404	2.5e-05	0.000369279	2.9798
Polr2m	-0.741703	9.58808	-5.93376	0.000196568	0.00114383	0.820273
Tulp2	-0.741549	4.70811	-5.47841	0.000354324	0.00167259	0.20176
Slc30a9	-0.741176	7.02506	-4.17495	0.00225143	0.0063298	-1.73337
Lage3	-0.740921	7.03465	-8.74317	8.99e-06	0.000226279	4.0382
Fads3	-0.740789	7.30395	-5.40443	0.000390977	0.00178817	0.0984403
5330417C22Rik	-0.7405	6.01321	-9.34112	5.16e-06	0.000187656	4.60977
Cyp2b13	-0.739658	5.67764	-6.251	0.000132546	0.00091072	1.23381
Gckr	-0.739605	5.97511	-8.30578	1.38e-05	0.000275606	3.59759
Ate1	-0.739581	6.63182	-5.64502	0.000284669	0.00146062	0.431527
2610020H08Rik	-0.739356	3.54555	-10.597	1.76e-06	0.000131423	5.70621
Gpalpp1	-0.73916	6.01857	-9.24255	5.64e-06	0.000192123	4.51789
Ctrb1	-0.738979	7.16215	-8.14221	1.62e-05	0.000299849	3.42765
Rit1	-0.738596	6.98641	-4.84478	0.000844294	0.00305331	-0.708856
Necab3	-0.738547	5.0408	-6.97572	5.65e-05	0.000560476	2.12725
Mrpl42	-0.738356	7.78989	-4.37151	0.00167709	0.00503165	-1.42643
Adcyap1	-0.737636	5.48723	-8.74527	8.98e-06	0.000226279	4.04027
Zfp612	-0.737604	4.87345	-3.03178	0.0137644	0.0263456	-3.59647
Ctbs	-0.737196	4.46613	-11.6489	7.75e-07	0.000102934	6.52952
Cap2	-0.736727	8.19714	-4.45483	0.00148274	0.00456187	-1.29787
Klra18	-0.736195	4.76154	-4.6543	0.00110857	0.00369751	-0.993911
Gabrb2	-0.735886	5.1363	-6.59754	8.75e-05	0.000718622	1.66972
Pik3c2g	-0.735727	3.85431	-11.124	1.16e-06	0.000118819	6.1287
Lck	-0.735404	4.73935	-9.19022	5.92e-06	0.000195596	4.46875
Ankra2	-0.735184	5.85584	-5.38763	0.000399857	0.00181353	0.0748724
Rnase4	-0.735154	7.84147	-3.80366	0.00398448	0.00976878	-2.32593
Osbpl1a	-0.734886	7.78605	-6.64693	8.25e-05	0.000695879	1.73053
St3gal3	-0.734619	6.77704	-6.09391	0.000160842	0.0010175	1.03079
Gm9744	-0.734601	4.8657	-7.73375	2.47e-05	0.000368129	2.99042
Bak1	-0.734557	5.55971	-6.76393	7.2e-05	0.000650688	1.87331
Pxmp4	-0.734149	8.14364	-4.8328	0.00085875	0.00309116	-0.726637
Ptgfrn	-0.734046	5.83121	-5.22232	0.000499816	0.00210103	-0.159263
Arl4d	-0.73394	6.1217	-6.79641	6.94e-05	0.000636332	1.91263
Irx2	-0.733776	6.1386	-8.22803	1.49e-05	0.000285495	3.51718
Ttbk2	-0.733706	4.94057	-7.81284	2.27e-05	0.000355439	3.07655
Akt2	-0.733689	7.93691	-4.63826	0.00113457	0.00376115	-1.01816
Sct	-0.733364	5.61609	-7.76056	2.4e-05	0.000364908	3.0197
Tfap2a	-0.733106	5.54981	-8.11225	1.67e-05	0.000305254	3.39621
Lancl2	-0.732954	5.42424	-9.39683	4.91e-06	0.000183859	4.66131
Fgf12	-0.73292	5.18977	-6.74077	7.4e-05	0.000658413	1.84519
Heatr5b	-0.732622	3.7698	-10.2763	2.29e-06	0.000141671	5.43867
C78891	-0.732591	3.72085	-5.33789	0.000427453	0.00189386	0.00483499
Cd36	-0.732567	10.7598	-2.88118	0.0176405	0.0321831	-3.84691
Car14	-0.732223	9.07852	-1.51784	0.162442	0.213599	-5.96793
Apoa4	-0.732206	5.7319	-7.11019	4.86e-05	0.000514732	2.2855
0610012G03Rik	-0.732064	6.72123	-5.69835	0.000265624	0.00139285	0.50422
Gli1	-0.731895	5.78606	-6.39707	0.000111036	0.000826006	1.41953
1810043G02Rik	-0.731856	5.44678	-9.04543	6.77e-06	0.000207698	4.33142
Pcdhb3	-0.731838	3.81952	-10.6761	1.65e-06	0.00013088	5.77094
AI506816	-0.73165	5.1662	-9.14817	6.15e-06	0.000198277	4.42906
Npas3	-0.731323	4.13229	-7.94576	1.98e-05	0.00033285	3.21969
Lrrc20	-0.731206	6.70774	-6.24732	0.000133144	0.000912427	1.22909
Apom	-0.730954	5.96685	-6.13338	0.000153164	0.000991312	1.08212
Zfp108	-0.730856	4.34275	-9.59997	4.1e-06	0.000174047	4.84683
Gstm5	-0.730737	8.59821	-4.10926	0.00248727	0.00680232	-1.83702
Max	-0.730458	6.21327	-5.4611	0.000362559	0.00169558	0.177645
C78859	-0.730283	4.33576	-11.4381	9.08e-07	0.00010871	6.37084
Atpaf2	-0.729941	7.17918	-5.73624	0.000252929	0.00134708	0.555631
Fech	-0.729892	7.12322	-5.28173	0.000461094	0.00199382	-0.074661
Slc6a6	-0.729887	7.29575	-5.66725	0.000276558	0.00143366	0.461875
Agpat6	-0.729883	6.12914	-5.70795	0.000262344	0.00138138	0.517265
Anapc1	-0.729376	6.69383	-6.63584	8.36e-05	0.000702059	1.7169
Cdhr1	-0.729243	4.85212	-5.85207	0.000218032	0.00121889	0.711487
Casr	-0.729238	5.94721	-8.99139	7.12e-06	0.000209603	4.27965
Mrpl14	-0.729109	8.77215	-3.62247	0.00529896	0.0122677	-2.62041
Cdo1	-0.728919	5.83193	-4.10005	0.00252239	0.00686814	-1.8516
Srms	-0.728711	6.27992	-7.51226	3.13e-05	0.000412633	2.74536
D2hgdh	-0.728636	6.85025	-4.574	0.0012454	0.00402228	-1.11562
Sgk2	-0.728473	5.89059	-6.17797	0.000144964	0.000961126	1.13985
Slc25a38	-0.728277	7.30553	-8.99926	7.06e-06	0.000209016	4.2872
Mad1l1	-0.728133	5.36869	-5.80202	0.000232425	0.00127192	0.644382
Perp	-0.728075	9.12368	-2.96606	0.0153358	0.028709	-3.70578
Pnpla8	-0.727983	8.256	-3.07299	0.0128643	0.0249114	-3.52793
Trappc2l	-0.727933	8.39641	-5.21409	0.000505452	0.00211518	-0.171027
Zscan5b	-0.727404	5.21776	-8.73036	9.11e-06	0.000226279	4.02557
Zfp654	-0.727223	4.27859	-7.04383	5.23e-05	0.000536207	2.20769
AI464131	-0.727147	4.02632	-7.22055	4.3e-05	0.000480271	2.4137
Scn8a	-0.727145	4.26072	-9.47278	4.59e-06	0.000180747	4.73111
Rlbp1	-0.72701	3.65135	-6.60091	8.71e-05	0.000717127	1.67388
Rhpn1	-0.72655	5.27811	-10.5855	1.78e-06	0.000131423	5.69675
Slc25a17	-0.726535	5.6611	-7.31871	3.86e-05	0.000456959	2.52645
Mki67	-0.726502	4.29485	-9.21222	5.8e-06	0.000194515	4.48944
Syt11	-0.725965	5.51987	-6.66139	8.11e-05	0.000693465	1.74827
Enam	-0.725941	5.07785	-8.68426	9.52e-06	0.000232522	3.97999
Ebag9	-0.72549	6.71272	-6.30298	0.000124412	0.000880331	1.30024
Ppox	-0.725307	5.61167	-10.1192	2.61e-06	0.000148654	5.30461
Krt6a	-0.725273	5.30124	-7.25564	4.13e-05	0.000470498	2.45414
Kif5c	-0.724984	4.5644	-9.64985	3.92e-06	0.000173423	4.89183
Asah2	-0.724857	5.3118	-6.75977	7.24e-05	0.000651543	1.86826
Scml2	-0.724805	5.01858	-5.98615	0.000184016	0.0011019	0.88953
Ccr4	-0.724689	5.77464	-6.77523	7.11e-05	0.000645361	1.887
Cyp2d22	-0.724685	6.30796	-2.88073	0.0176535	0.0322022	-3.84764
Foxj1	-0.72454	5.58005	-9.78725	3.47e-06	0.00016428	5.01463
Edar	-0.724182	5.30002	-8.47318	1.17e-05	0.000255027	3.76856
4933421I07Rik	-0.724172	5.89511	-6.1762	0.00014528	0.000961751	1.13757
Vamp1	-0.72406	5.9117	-7.97135	1.93e-05	0.000329296	3.24702
Ifnb1	-0.723765	5.09324	-5.25678	0.00047695	0.0020364	-0.110133
Ndufb3	-0.723641	10.3826	-4.11032	0.00248328	0.00679569	-1.83535
Pcp4l1	-0.723499	8.85374	-3.23754	0.00983313	0.0200504	-3.25461
Tbl1x	-0.723445	6.73545	-5.31764	0.000439268	0.00193221	-0.0237772
Dctn4	-0.723335	6.82896	-8.04669	1.79e-05	0.000317613	3.32707
Rhot2	-0.723309	7.80136	-3.02306	0.0139631	0.0266321	-3.61097
Cyp2c54	-0.723161	5.53922	-7.10342	4.89e-05	0.000517382	2.27758
Ces1d	-0.722986	6.20926	-3.22252	0.0100763	0.0204187	-3.27952
Timm9	-0.722758	3.66884	-9.35083	5.12e-06	0.000187641	4.61878
Ptges2	-0.722696	7.53919	-5.95489	0.000191396	0.00112606	0.848257
Eno3	-0.722566	11.8668	-2.76721	0.021301	0.0377065	-4.03609
Mterfd1	-0.722344	6.01693	-3.17763	0.0108409	0.021695	-3.35403
Nudt1	-0.722132	6.4926	-5.12538	0.000570723	0.00231052	-0.298418
Aoc3	-0.721651	5.23044	-7.36311	3.67e-05	0.00044513	2.57707
Tbxa2r	-0.721065	7.67902	-8.14603	1.62e-05	0.000299849	3.43165
Il10rb	-0.720787	8.62867	-5.29161	0.000454975	0.00197752	-0.0606415
Oard1	-0.720423	4.99112	-6.78692	7.01e-05	0.000639492	1.90115
Asb9	-0.720237	5.3243	-9.09636	6.46e-06	0.000202975	4.37995
Pax6	-0.71982	4.72647	-9.43159	4.76e-06	0.000182963	4.69332
2610301B20Rik	-0.719304	5.04895	-6.0941	0.000160805	0.0010175	1.03104
Htra3	-0.718487	7.29605	-5.24747	0.000483016	0.00205423	-0.123393
Cc2d1a	-0.718415	5.15265	-3.61311	0.00537817	0.0124137	-2.63571
D6Ertd47e	-0.718279	5.68156	-5.43283	0.000376447	0.00174057	0.138189
Kcnk7	-0.718277	6.3484	-5.49875	0.000344911	0.00164545	0.230023
Dus3l	-0.718157	7.60985	-7.57454	2.92e-05	0.000399186	2.81484
Wdr55	-0.718115	7.33635	-4.40336	0.00159978	0.00485214	-1.37718
Dnajc13	-0.717976	5.88458	-2.38435	0.040209	0.0642399	-4.66466
Lmf1	-0.717971	6.63202	-5.95707	0.000190871	0.00112415	0.85114
Sh3d19	-0.717776	5.05281	-8.08872	1.71e-05	0.000310808	3.37145
1700123K08Rik	-0.717564	5.45089	-9.17286	6.02e-06	0.000196424	4.45238
Zfpm2	-0.717501	7.08813	-6.148	0.000150421	0.000978945	1.10108
Adcy9	-0.717289	7.4174	-3.78046	0.00413169	0.0100429	-2.36346
Map4k2	-0.716848	6.13296	-5.99299	0.000182442	0.00109899	0.898548
Pde7a	-0.716566	4.72228	-5.55374	0.000320785	0.00157194	0.30614
C4bp	-0.716446	4.69137	-7.67271	2.63e-05	0.000376856	2.92346
Padi1	-0.716361	4.21472	-10.1061	2.64e-06	0.000148654	5.2934
Rnf4	-0.716346	6.64252	-6.79859	6.92e-05	0.000635695	1.91527
AA516738	-0.716163	5.01705	-8.56244	1.07e-05	0.000248497	3.85852
Pspn	-0.716104	5.51721	-5.49805	0.000345231	0.00164581	0.229049
Ces2a	-0.715985	4.51855	-9.7829	3.49e-06	0.000164306	5.01077
Slc22a3	-0.715231	4.87484	-6.54909	9.26e-05	0.000746833	1.60975
Ube2w	-0.715167	4.77056	-7.68277	2.61e-05	0.000375403	2.93452
D4Ertd335e	-0.714832	5.74673	-6.81078	6.82e-05	0.000629929	1.92998
Aldh3a1	-0.714638	3.54786	-9.41782	4.82e-06	0.000182963	4.68065
Bcs1l	-0.71459	7.49407	-5.90353	0.000204231	0.00117496	0.780131
Gm10228	-0.714056	4.11138	-9.4304	4.76e-06	0.000182963	4.69222
Bcl7a	-0.713857	4.8231	-7.39019	3.57e-05	0.000436568	2.60782
Sdhc	-0.713838	10.0163	-2.59055	0.0285555	0.0481261	-4.32792
Slc25a46	-0.713657	8.23655	-6.46446	0.000102418	0.000792566	1.50424
Cog6	-0.713253	7.19586	-3.58937	0.00558465	0.012775	-2.67452
Ddx26b	-0.713237	5.77265	-10.2144	2.41e-06	0.000144411	5.38609
Ggcx	-0.712704	4.63609	-4.03207	0.00279832	0.00742153	-1.9595
Smad9	-0.712648	4.72781	-10.0012	2.89e-06	0.000156453	5.20264
Anapc11	-0.712581	8.10669	-7.16388	4.57e-05	0.000496112	2.34805
Hps3	-0.712572	6.58456	-4.52519	0.00133731	0.00422296	-1.19004
Ikzf2	-0.712166	4.63632	-7.21294	4.33e-05	0.000482338	2.40489
Lypd3	-0.712108	4.36534	-5.75534	0.000246782	0.00132456	0.581462
Amotl2	-0.710927	8.33741	-5.27381	0.000466066	0.00200405	-0.0859135
Elf4	-0.710652	6.47166	-6.10655	0.00015834	0.0010089	1.04725
Rprd2	-0.710607	6.86843	-6.64834	8.24e-05	0.000695879	1.73226
Bcam	-0.710486	9.08101	-2.18288	0.0560947	0.085545	-4.98722
Fars2	-0.710445	5.65029	-5.33528	0.000428954	0.00189986	0.00115527
Slc10a1	-0.71034	4.74446	-5.73643	0.000252869	0.00134708	0.555882
Armcx4	-0.710063	5.06398	-5.22504	0.000497971	0.0020953	-0.155384
F12	-0.709916	5.59621	-7.36073	3.68e-05	0.000445773	2.57436
Tssk2	-0.709808	4.74048	-7.0558	5.16e-05	0.000530286	2.22177
Atp2a2	-0.709788	11.4475	-2.97121	0.0152063	0.0285197	-3.69721
Dnajc4	-0.709689	7.60951	-5.66831	0.000276178	0.00143226	0.463317
Gm8479	-0.709489	4.69323	-8.13584	1.63e-05	0.000301358	3.42097
Cst10	-0.709273	4.73044	-4.99986	0.000679034	0.00259673	-0.480612
Sync	-0.709257	5.4748	-10.3252	2.2e-06	0.000139785	5.48
Ccser2	-0.709135	8.69332	-8.177	1.57e-05	0.000294946	3.46404
Zfp87	-0.709034	6.37577	-8.11201	1.67e-05	0.000305254	3.39596
Clybl	-0.708898	6.57131	-2.20468	0.0541167	0.0830455	-4.95271
Krt27	-0.708882	4.97969	-8.77494	8.73e-06	0.000225466	4.06944
Ivd	-0.708865	9.25335	-3.75212	0.00431925	0.0104173	-2.40937
Lrriq4	-0.708805	5.18676	-6.24138	0.000134114	0.000917629	1.22147
Fam173a	-0.708238	7.89181	-7.66218	2.66e-05	0.000379131	2.91186
Itih5	-0.708212	4.74602	-4.07175	0.00263357	0.00708219	-1.89645
Slc25a36	-0.708198	6.02936	-7.90473	2.07e-05	0.000340654	3.17572
Aqp3	-0.707531	4.62432	-8.96887	7.27e-06	0.00021167	4.25799
Slc38a3	-0.707477	8.11354	-4.0118	0.00288668	0.00760149	-1.99179
Musk	-0.707183	5.37243	-8.56024	1.07e-05	0.000248586	3.85632
Pinlyp	-0.707098	4.50257	-6.3506	0.000117435	0.000854122	1.36077
Zkscan5	-0.707025	5.95564	-5.85522	0.000217157	0.00121667	0.715709
Pou3f2	-0.706935	7.17583	-7.43644	3.39e-05	0.000427774	2.66014
1700074P13Rik	-0.706893	3.95498	-8.47008	1.17e-05	0.000255027	3.76542
Ppnr	-0.706811	4.47326	-7.57963	2.91e-05	0.000398183	2.82051
Fam174b	-0.706798	9.8245	-5.87114	0.000212802	0.00120253	0.736973
Dhx16	-0.706519	5.99217	-3.6654	0.00495104	0.0116275	-2.55036
Ifng	-0.706356	4.52026	-7.65613	2.68e-05	0.00038032	2.90519
Taf6l	-0.706256	6.09341	-7.9367	2e-05	0.000334988	3.21001
Olfr49	-0.706158	4.51098	-7.18037	4.49e-05	0.000491602	2.36719
Iigp1	-0.706124	6.33862	-4.22909	0.00207488	0.00593577	-1.64833
Tmc4	-0.705876	5.95156	-7.83855	2.21e-05	0.000353022	3.1044
Fam120a	-0.705738	6.67617	-9.43047	4.76e-06	0.000182963	4.69229
Rnf207	-0.705482	5.95549	-3.31198	0.00871451	0.0182029	-3.13127
Tsc22d4	-0.705175	9.07206	-6.08396	0.000162843	0.00102399	1.01782
Tex101	-0.7051	5.67556	-7.50342	3.16e-05	0.000414685	2.73546
Cyp2d34	-0.704976	5.63911	-6.40057	0.000110569	0.000825981	1.42395
Prss40	-0.70471	6.38825	-8.23174	1.48e-05	0.000285495	3.52102
Inpp5k	-0.704671	7.25732	-5.17224	0.000535179	0.00220007	-0.230975
Lnx2	-0.70467	7.41479	-7.00174	5.49e-05	0.000552297	2.15804
Srd5a2	-0.704649	4.26859	-6.9926	5.54e-05	0.000554844	2.14723
Zufsp	-0.704579	5.62571	-6.72699	7.52e-05	0.000662214	1.82843
Nxf7	-0.704446	4.67821	-6.05988	0.000167798	0.00104159	0.986363
Trappc3	-0.703948	8.70617	-9.02954	6.87e-06	0.000208403	4.31622
Tnni2	-0.703847	5.67521	-8.19958	1.53e-05	0.000290423	3.48758
Asb17	-0.703688	4.22543	-5.28634	0.000458228	0.0019857	-0.0681177
Atoh1	-0.703682	4.98078	-6.6606	8.12e-05	0.000693465	1.74731
Colq	-0.703635	5.58457	-6.52841	9.49e-05	0.000756954	1.58405
Pitx3	-0.70353	6.1666	-7.1057	4.88e-05	0.000516901	2.28025
Vegfb	-0.703484	10.1315	-2.6098	0.0276573	0.0468788	-4.29624
Sigmar1	-0.703387	6.70265	-4.69246	0.00104927	0.00357091	-0.936393
Med24	-0.703358	6.13423	-8.11336	1.67e-05	0.000305254	3.39738
Thumpd1	-0.703334	6.27407	-5.39538	0.000395736	0.00180292	0.0857432
Gabarapl2	-0.703014	9.27356	-4.96429	0.000713599	0.00269522	-0.532651
Msx2	-0.702918	5.43461	-6.8044	6.87e-05	0.000634126	1.92228
Dppa3	-0.702473	5.98459	-6.55334	9.21e-05	0.00074447	1.61502
Lpo	-0.702411	5.30358	-10.2993	2.25e-06	0.000140488	5.45815
Ctsj	-0.702403	3.70922	-9.50046	4.47e-06	0.000178993	4.75641
A030005L19Rik	-0.702267	5.52609	-7.07142	5.07e-05	0.000525617	2.24011
Pdlim5	-0.702184	7.17918	-3.80452	0.00397909	0.00975923	-2.32452
Prl	-0.702132	5.51345	-6.8848	6.27e-05	0.000597866	2.01894
Zfp605	-0.702075	4.25993	-6.90936	6.09e-05	0.000588324	2.0483
Mmel1	-0.70207	5.56274	-7.06197	5.13e-05	0.00052787	2.22901
Rac3	-0.702036	5.66441	-6.96338	5.73e-05	0.000564194	2.1126
Ctf1	-0.701951	7.21497	-5.23192	0.000493329	0.00208266	-0.145558
Tfcp2	-0.701756	6.3848	-9.41296	4.84e-06	0.000182963	4.67617
Slc25a42	-0.701665	7.97983	-2.98769	0.0147993	0.0279007	-3.6698
B3galt5	-0.701352	4.44509	-8.07855	1.73e-05	0.000312297	3.36073
Il12b	-0.701204	4.56269	-10.3626	2.13e-06	0.000137056	5.51147
2310057N15Rik	-0.701078	4.28733	-8.75279	8.91e-06	0.000226279	4.04766
Cphx3	-0.700903	5.31632	-9.35549	5.09e-06	0.000187641	4.62309
Cd1d2	-0.70088	5.19951	-7.32	3.85e-05	0.000456733	2.52792
Defb13	-0.700717	4.35647	-7.74319	2.45e-05	0.00036779	3.00074
Gpx2	-0.700021	5.55783	-5.27368	0.000466148	0.00200405	-0.0860992
Lbh	-0.699682	7.46538	-6.33036	0.000120348	0.000866611	1.33507
Ptprn2	-0.699575	4.97898	-6.32489	0.000121149	0.00086902	1.32812
Tprgl	-0.699253	9.38476	-4.7298	0.000994528	0.00344436	-0.880321
Slc35f5	-0.699166	7.72743	-3.04953	0.0133691	0.0256945	-3.56695
Mbl2	-0.699141	5.11539	-5.46576	0.000360322	0.00169049	0.184139
Lifr	-0.698789	5.30675	-6.95451	5.79e-05	0.000566481	2.10207
Hepacam2	-0.698364	3.64909	-9.08594	6.52e-06	0.000202975	4.37004
Timm17a	-0.69828	10.0766	-6.3538	0.000116982	0.000852425	1.36482
Lrrc58	-0.698195	8.48783	-2.68778	0.0242995	0.0420169	-4.16758
Fem1a	-0.698172	7.31099	-3.87144	0.0035852	0.00900662	-2.21659
Ccdc91	-0.698126	5.40256	-5.31623	0.000440105	0.00193285	-0.0257754
Tmem184c	-0.698046	5.80104	-3.04231	0.0135284	0.0259472	-3.57895
Grid2ip	-0.698006	6.43003	-6.99281	5.54e-05	0.000554844	2.14748
Psme3	-0.697968	6.39265	-7.39036	3.57e-05	0.000436568	2.60801
Ly6d	-0.697902	5.25359	-7.91376	2.05e-05	0.000339561	3.18542
Swsap1	-0.69762	6.36825	-8.65665	9.77e-06	0.000237437	3.9526
Ppp1r42	-0.697425	3.98218	-9.47852	4.56e-06	0.000180368	4.73636
Nr2c1	-0.697381	4.82923	-5.65835	0.000279777	0.00144432	0.449726
Cyct	-0.697206	4.66992	-8.06721	1.75e-05	0.000315198	3.34876
Arx	-0.696837	4.42157	-7.68451	2.6e-05	0.000375197	2.93644
Krit1	-0.696675	4.04015	-8.42091	1.23e-05	0.000260751	3.71549
Rxra	-0.696524	7.27848	-4.53435	0.00131953	0.00418503	-1.17605
Vma21	-0.696054	6.03087	-9.03328	6.84e-06	0.000208164	4.3198
Rnf186	-0.696011	5.60276	-6.17625	0.000145271	0.000961751	1.13763
Casd1	-0.695949	6.0097	-6.26545	0.000130229	0.000900013	1.25231
Zim1	-0.695919	4.20897	-8.74318	8.99e-06	0.000226279	4.0382
Alg12	-0.695601	5.56391	-7.25378	4.14e-05	0.000471052	2.45199
Atp9a	-0.695374	6.86936	-6.59053	8.82e-05	0.000721854	1.66106
Nck1	-0.695364	6.1765	-4.23726	0.00204954	0.00588132	-1.63553
Dbnl	-0.695286	7.35574	-4.35039	0.00173055	0.00515165	-1.45917
Rab9	-0.695072	7.29351	-2.57595	0.0292562	0.0490598	-4.35192
Cd207	-0.695065	5.74937	-9.5838	4.15e-06	0.000174846	4.8322
Txndc16	-0.694917	5.0853	-6.61669	8.55e-05	0.000710663	1.69333
Cdh23	-0.694775	5.1023	-7.73894	2.46e-05	0.00036779	2.99609
Gaa	-0.694457	8.55563	-4.65597	0.00110591	0.00369301	-0.991395
Myl1	-0.694232	7.99394	-3.34654	0.00824087	0.0174509	-3.0741
Mansc1	-0.694193	4.02315	-9.19766	5.88e-06	0.000195189	4.47575
Cdc37	-0.693957	7.49783	-9.23629	5.68e-06	0.000192123	4.51203
Dgke	-0.693716	5.47948	-7.15008	4.64e-05	0.000500868	2.33201
Gtl3	-0.69371	5.62689	-4.66245	0.00109562	0.00367155	-0.981621
Lmo4	-0.693677	7.46892	-4.7467	0.000970752	0.00338492	-0.854995
Slc29a4	-0.693189	4.27492	-6.28229	0.000127583	0.000890213	1.27384
Srpx2	-0.693179	5.45583	-6.62762	8.44e-05	0.000705227	1.70679
Qrsl1	-0.692957	5.337	-5.98965	0.000183208	0.00110011	0.89415
Itgb1	-0.692721	6.21776	-4.96621	0.000711689	0.00269319	-0.529842
Nsd1	-0.692703	4.71577	-8.54363	1.09e-05	0.000249464	3.83964
Rnf183	-0.692609	5.4684	-5.50495	0.000342098	0.00163805	0.238618
Immp2l	-0.692599	7.15538	-4.40462	0.0015968	0.00484649	-1.37524
AA545190	-0.692598	3.92066	-7.11267	4.84e-05	0.000514142	2.28839
Klc4	-0.692565	6.51688	-6.32571	0.000121029	0.000868636	1.32916
Acads	-0.692515	9.38179	-3.84213	0.00375243	0.00932781	-2.26381
Ubr7	-0.692501	6.63103	-7.35743	3.7e-05	0.00044628	2.5706
Grb10	-0.692432	6.4689	-7.61886	2.79e-05	0.00038972	2.86402
Phkg1	-0.692395	4.3866	-4.16165	0.00229717	0.00642244	-1.7543
Caln1	-0.692075	5.25021	-7.81376	2.27e-05	0.000355439	3.07755
Fga	-0.692021	3.89393	-9.60325	4.08e-06	0.000174047	4.8498
Cemip	-0.691915	6.12462	-6.60689	8.65e-05	0.00071414	1.68125
D1Ertd75e	-0.691904	5.08383	-7.5838	2.9e-05	0.000397433	2.82514
Prrx2	-0.691841	4.90749	-7.58662	2.89e-05	0.000397033	2.82827
Cryga	-0.691826	4.41575	-8.79267	8.58e-06	0.000224586	4.08683
Usp24	-0.691814	5.41797	-4.07236	0.00263115	0.00707735	-1.89549
Prune	-0.691428	7.71077	-8.78394	8.65e-06	0.000224586	4.07827
Fign	-0.691342	5.20827	-4.38556	0.00164252	0.00494886	-1.4047
Myh2	-0.691308	6.32236	-5.30734	0.000445409	0.00194632	-0.038346
Capza3	-0.691237	3.97107	-5.54355	0.000325115	0.0015861	0.292067
Hoxd9	-0.690269	5.95554	-5.90469	0.00020393	0.00117375	0.781675
Cd38	-0.690246	5.83809	-5.35851	0.000415769	0.0018541	0.0339182
Plin3	-0.689982	8.91116	-2.55049	0.0305199	0.0509042	-4.39374
Npy1r	-0.689864	4.8003	-8.96642	7.28e-06	0.000211683	4.25563
Sephs1	-0.689803	4.95536	-7.61549	2.8e-05	0.000390285	2.86028
Ict1	-0.689754	8.21971	-6.05394	0.000169046	0.00104719	0.978582
Bet1	-0.689686	4.96176	-5.42613	0.00037982	0.00175182	0.128827
Dhrs11	-0.689327	7.86032	-2.67226	0.0249334	0.0429254	-4.19323
Khdrbs3	-0.689213	6.91936	-4.76553	0.000944991	0.00331853	-0.826841
Sprr1b	-0.689211	5.14992	-3.75179	0.00432152	0.0104189	-2.40991
Prpf19	-0.689175	9.44343	-4.45778	0.00147631	0.00454635	-1.29333
Bfar	-0.689038	8.31453	-4.34458	0.00174559	0.00518473	-1.4682
Pafah2	-0.689	6.84483	-8.54551	1.09e-05	0.000249464	3.84153
Zfp62	-0.688928	4.2539	-5.98856	0.000183459	0.00110053	0.89271
4921536K21Rik	-0.688258	4.04543	-7.41478	3.47e-05	0.000431548	2.63567
Nnt	-0.688207	9.50969	-4.70777	0.00102644	0.00352485	-0.913375
Zfp398	-0.688143	4.63089	-6.99223	5.55e-05	0.000554844	2.14679
Hcn2	-0.688036	5.80551	-6.042	0.000171583	0.00105874	0.962953
Mrpl51	-0.687985	6.92921	-9.29129	5.4e-06	0.000190937	4.56343
Chst3	-0.687811	6.12675	-4.98713	0.000691191	0.00263472	-0.499212
Vmn2r10	-0.687778	4.99268	-7.50057	3.17e-05	0.000415433	2.73227
Alad	-0.687639	7.11765	-4.26791	0.00195736	0.00568178	-1.58758
Ces2e	-0.687623	4.09265	-6.54282	9.33e-05	0.000750279	1.60197
Ripply3	-0.687425	6.81718	-8.80991	8.44e-06	0.000223276	4.10371
Myom2	-0.686957	10.5714	-3.24097	0.00977841	0.0199638	-3.24892
Sec31a	-0.686482	8.75367	-5.77376	0.000241007	0.00130375	0.60632
Tnfsf13b	-0.686383	5.87791	-8.90554	7.71e-06	0.000216406	4.19682
Pip5k1b	-0.686177	6.21994	-6.17106	0.000146203	0.000966879	1.13093
Rmdn1	-0.686121	5.01571	-7.26622	4.08e-05	0.000467497	2.4663
Atrx	-0.686088	5.18625	-6.79589	6.94e-05	0.000636332	1.91201
Tapbp	-0.685792	7.54348	-6.40143	0.000110455	0.000825912	1.42503
Mrpl36	-0.685781	6.41251	-5.18762	0.000524045	0.00216796	-0.208922
Atl2	-0.685662	7.1844	-3.32246	0.00856793	0.0179684	-3.11392
Slco1c1	-0.685597	4.3754	-7.45549	3.32e-05	0.00042385	2.68162
Gpr89	-0.685492	6.63878	-4.60399	0.0011923	0.00389919	-1.07006
Rasl10a	-0.685367	4.64659	-4.47296	0.00144372	0.00447026	-1.27002
Dhrs2	-0.685319	5.98795	-6.05087	0.000169694	0.00104983	0.974567
Il13	-0.685015	5.91454	-10.1361	2.58e-06	0.00014813	5.31915
Rab28	-0.68447	6.43634	-6.34625	0.000118055	0.00085672	1.35525
Lmbrd1	-0.684363	7.15749	-6.28265	0.000127527	0.000890213	1.2743
Mcts2	-0.684215	6.32796	-4.96953	0.000708396	0.00268287	-0.524981
Ndrg4	-0.683966	10.1871	-2.32038	0.0447034	0.0703776	-4.7679
Pex11a	-0.683964	7.04772	-6.34369	0.000118421	0.000858424	1.352
Tnnc2	-0.683942	4.25505	-7.2388	4.21e-05	0.000476499	2.43474
Hoxd10	-0.683922	3.65261	-9.17954	5.98e-06	0.000196424	4.45869
Ppp1cb	-0.683892	6.41276	-5.317	0.000439645	0.00193221	-0.0246781
Nacc1	-0.683652	6.71566	-5.5348	0.000328884	0.00159824	0.279966
Gabrr2	-0.683507	5.41886	-4.12886	0.00241426	0.00665943	-1.80603
Alkbh5	-0.683401	8.75928	-8.88548	7.86e-06	0.000217722	4.17736
Mxra8	-0.683215	8.12699	-6.23246	0.000135586	0.000922378	1.21002
Mrpl19	-0.683198	5.34086	-6.12993	0.00015382	0.00099211	1.07764
Adam15	-0.683192	7.80458	-5.93574	0.000196077	0.00114164	0.822894
Lonp2	-0.682964	5.65663	-5.23684	0.000490039	0.00207656	-0.138538
Tpgs1	-0.682872	5.98931	-4.4006	0.00160632	0.00486634	-1.38145
Loxl3	-0.682609	6.36065	-9.63259	3.98e-06	0.000173423	4.87628
Adck1	-0.682526	7.87095	-8.35535	1.31e-05	0.000267201	3.64852
Arhgap20	-0.682443	7.116	-5.53035	0.000330818	0.00160431	0.273812
Tcta	-0.682386	6.33821	-5.18496	0.000525953	0.00217447	-0.212735
Cd3g	-0.682369	4.4398	-9.20209	5.86e-06	0.000195165	4.47992
Cmbl	-0.682032	7.35902	-2.39814	0.0393004	0.0629608	-4.64232
Serpini1	-0.681788	5.04929	-6.28551	0.000127084	0.000888635	1.27795
Ganc	-0.681387	5.4739	-7.23202	4.24e-05	0.000477696	2.42693
Tm6sf1	-0.681314	5.33214	-5.74326	0.000250652	0.00133928	0.565125
Wasf1	-0.681109	3.95194	-8.95349	7.37e-06	0.000212636	4.24317
Araf	-0.681002	6.70718	-6.73423	7.45e-05	0.000661408	1.83724
Abcg4	-0.680904	6.36797	-5.64979	0.000282909	0.0014536	0.43804
Rock1	-0.680878	6.52224	-4.25333	0.00200064	0.00577912	-1.61037
Six4	-0.680826	5.79946	-4.91089	0.000769099	0.00284896	-0.611138
Nudt7	-0.680824	8.05054	-2.40996	0.0385372	0.0619405	-4.62314
T2	-0.680441	6.64434	-8.38135	1.28e-05	0.000264312	3.67514
Pnkd	-0.680336	7.63568	-4.43432	0.00152824	0.00467647	-1.32943
Vmn2r26	-0.680277	5.59329	-5.79066	0.000235834	0.00128414	0.629097
Acot11	-0.680264	5.62751	-6.5701	9.03e-05	0.000735064	1.63579
Elmo1	-0.680177	6.50734	-7.08799	4.98e-05	0.000521542	2.25952
Theg	-0.680028	5.73229	-5.85323	0.000217709	0.00121761	0.713042
Crb3	-0.680016	7.17845	-6.50498	9.76e-05	0.000768923	1.55487
Use1	-0.680014	8.38621	-4.27392	0.00193981	0.00564111	-1.57819
Zbtb16	-0.679763	6.96518	-2.35038	0.0425373	0.0674723	-4.71957
Arcn1	-0.679754	7.94058	-5.3829	0.000402395	0.00181865	0.0682309
1700019N19Rik	-0.679615	5.1774	-8.92198	7.59e-06	0.000215309	4.21274
2610524H06Rik	-0.679557	5.5168	-4.89277	0.000788967	0.00290393	-0.63786
Cntnap4	-0.679342	5.30199	-3.88427	0.00351453	0.00887336	-2.19596
E430018J23Rik	-0.679127	5.06374	-7.70514	2.55e-05	0.000371349	2.95908
Zfp354b	-0.679124	4.26321	-8.61467	1.02e-05	0.000242643	3.91079
C79490	-0.679091	4.6393	-5.38568	0.000400905	0.00181443	0.072124
Osgin2	-0.678866	5.14222	-10.241	2.36e-06	0.000141884	5.40873
Sgms1	-0.678767	6.0167	-2.71222	0.0233342	0.0406511	-4.12717
Acss1	-0.678738	5.89227	-4.1356	0.00238971	0.00662035	-1.7954
Pikfyve	-0.678477	6.01848	-6.40543	0.000109925	0.000823364	1.43007
Zap70	-0.678333	6.94247	-9.31398	5.29e-06	0.000188141	4.58456
D930048N14Rik	-0.678301	4.87864	-8.16183	1.59e-05	0.000298626	3.44819
Hoxa4	-0.678301	3.93292	-8.25609	1.45e-05	0.000283082	3.54627
Havcr1	-0.678294	4.53585	-8.23391	1.48e-05	0.000285495	3.52328
Ctla4	-0.678247	5.27892	-7.29289	3.97e-05	0.000462234	2.4969
Zfp280d	-0.678223	5.99991	-10.4709	1.95e-06	0.000132932	5.60197
Lrrc16a	-0.678117	5.03583	-5.59828	0.00030258	0.00151441	0.367474
Dtna	-0.678071	6.1609	-7.57038	2.94e-05	0.000399527	2.81022
Gigyf1	-0.677987	6.91325	-5.45566	0.000365185	0.00170466	0.17007
Pmel	-0.67784	5.89917	-8.43321	1.21e-05	0.00025888	3.72801
Arhgef3	-0.677764	5.10579	-7.51567	3.11e-05	0.000412633	2.74917
Fut2	-0.677545	5.15285	-6.71714	7.6e-05	0.000666244	1.81643
Enpp2	-0.677542	5.12252	-7.76986	2.38e-05	0.000363055	3.02984
Slc35e1	-0.677541	8.18491	-8.80034	8.52e-06	0.000224081	4.09435
E230006M18Rik	-0.677511	4.1245	-9.28645	5.42e-06	0.000191259	4.55893
Oxsm	-0.677509	4.78649	-9.49132	4.51e-06	0.000178993	4.74807
Bola1	-0.677374	5.44391	-7.45719	3.32e-05	0.00042385	2.68353
Gcnt1	-0.677176	4.25487	-7.29263	3.97e-05	0.000462234	2.49661
Il1rl2	-0.67711	6.04813	-5.3447	0.000423553	0.00188233	0.0144527
Mrps34	-0.676559	9.40325	-5.19054	0.000521959	0.00216276	-0.204737
Lonp1	-0.676531	9.26884	-5.59028	0.000305768	0.00152374	0.356472
Ppp1r2	-0.676413	7.84759	-3.91473	0.0033525	0.00853645	-2.14703
Creb1	-0.676366	4.82494	-8.92015	7.61e-06	0.000215309	4.21096
Pcx	-0.676299	6.78415	-6.24599	0.000133359	0.000913425	1.22739
4933417A18Rik	-0.676272	4.28191	-5.94058	0.000194884	0.00113672	0.829303
Ndufab1	-0.676264	7.69517	-4.33218	0.00177812	0.00526021	-1.48746
Ambp	-0.676187	4.49583	-7.33441	3.79e-05	0.000453716	2.54437
Pdf	-0.675889	8.40279	-6.46754	0.000102042	0.000790749	1.50809
Stxbp3a	-0.675799	3.92888	-9.60908	4.06e-06	0.000173797	4.85506
Kifc3	-0.675762	8.01625	-9.20096	5.86e-06	0.000195165	4.47885
Gc	-0.675688	4.7677	-5.60633	0.000299412	0.00150201	0.378523
Tmem8	-0.675684	6.42775	-8.34529	1.32e-05	0.000268304	3.63821
Cluh	-0.675681	9.17461	-4.70094	0.00103656	0.00354391	-0.923643
Atp5g2	-0.675328	7.73	-7.8722	2.14e-05	0.000346199	3.14072
Mrpl27	-0.674968	8.6335	-4.02958	0.00280902	0.007436	-1.96347
Mtif2	-0.674865	5.95487	-5.41022	0.000387965	0.00177961	0.106559
Pus10	-0.674587	6.37897	-6.37046	0.000114653	0.000841865	1.38591
Il4	-0.674568	4.92861	-5.84337	0.000220462	0.00122879	0.699851
Smim19	-0.674566	7.846	-2.89319	0.0172941	0.0316617	-3.82695
Kcnb1	-0.674511	5.91874	-4.61862	0.00116728	0.00384031	-1.04788
Ube4a	-0.674191	5.9183	-7.21317	4.33e-05	0.000482338	2.40516
P2ry12	-0.673848	4.61242	-6.42393	0.00010751	0.000815455	1.45337
Sema3b	-0.673828	5.74741	-7.27158	4.06e-05	0.000466652	2.47245
Aass	-0.673575	3.77422	-7.01155	5.43e-05	0.000548751	2.16963
Stag2	-0.67355	6.14821	-5.57398	0.00031237	0.00154386	0.334047
Dnajb8	-0.672718	6.59963	-6.43801	0.00010571	0.000809449	1.47107
Tex261	-0.672506	8.05018	-6.02399	0.00017549	0.00107212	0.939321
1190002N15Rik	-0.672357	6.34934	-3.98043	0.00302922	0.00789242	-2.04183
Flot1	-0.672239	9.58749	-6.35903	0.000116246	0.000849774	1.37145
Efcab14	-0.672208	6.38153	-8.28171	1.41e-05	0.000279376	3.57276
Pfkfb2	-0.672166	5.1657	-8.9204	7.61e-06	0.000215309	4.21121
Fam213a	-0.671989	4.63637	-6.24903	0.000132866	0.000911958	1.23128
Pkd2l2	-0.671899	4.49835	-7.07908	5.03e-05	0.000523616	2.24909
Sf1	-0.671887	7.15942	-5.27421	0.00046581	0.00200392	-0.085338
Pou4f3	-0.671715	4.71452	-7.98582	1.9e-05	0.000327871	3.26246
Adamtsl4	-0.671675	7.744	-3.6648	0.00495567	0.0116298	-2.55133
Slco3a1	-0.67146	8.40647	-4.34029	0.00175677	0.00520844	-1.47486
Cav1	-0.67134	10.2272	-4.60914	0.00118342	0.00388026	-1.06225
Tpgs2	-0.67121	5.81981	-6.897	6.18e-05	0.000593261	2.03353
Hsd17b11	-0.671098	7.43341	-3.36658	0.00797861	0.0169884	-3.04098
Rcl1	-0.670965	7.2313	-8.15357	1.6e-05	0.0002991	3.43955
Adrb3	-0.67074	5.58572	-5.14129	0.000558379	0.00227324	-0.275484
Myh14	-0.670675	8.77714	-3.11678	0.011974	0.0234979	-3.45514
Tusc2	-0.670641	8.02681	-8.09862	1.7e-05	0.000308561	3.38188
Arhgap24	-0.670369	6.01442	-3.15963	0.011164	0.0222445	-3.38392
Slc6a20a	-0.670356	3.82937	-6.74295	7.38e-05	0.000658047	1.84784
Amfr	-0.670329	8.56795	-5.57401	0.00031236	0.00154386	0.334079
Cma1	-0.670312	5.85319	-5.76746	0.000242963	0.00130999	0.597832
Atp1a3	-0.670246	5.31541	-6.91828	6.03e-05	0.000583756	2.05894
Gpr63	-0.669623	5.82473	-7.6819	2.61e-05	0.000375403	2.93357
Tmem53	-0.669289	6.31474	-4.08169	0.00259394	0.00700449	-1.88068
Olfr690	-0.669092	4.75772	-5.20776	0.000509829	0.00212715	-0.180072
Cdx1	-0.669054	4.58612	-7.43113	3.41e-05	0.000427774	2.65415
Cnnm2	-0.669036	5.22338	-8.74113	9.01e-06	0.000226279	4.03618
Letm1	-0.6688	6.68864	-7.59181	2.87e-05	0.000395592	2.83404
Tmem30a	-0.66868	6.57662	-5.51263	0.000338643	0.00162529	0.249271
Arfip2	-0.668628	7.8421	-6.8954	6.19e-05	0.000593473	2.03162
Galntl5	-0.668175	4.11082	-6.19624	0.000141744	0.000949909	1.16342
Zfp109	-0.668013	5.75281	-6.52022	9.58e-05	0.000761556	1.57386
Suclg1	-0.668002	10.3056	-2.63797	0.0263934	0.0450583	-4.24981
Gopc	-0.667847	5.40497	-5.10794	0.00058459	0.00234411	-0.323594
Zfp319	-0.667743	5.5341	-8.22684	1.49e-05	0.000285495	3.51594
Tysnd1	-0.667555	7.27164	-7.9497	1.97e-05	0.000332311	3.22391
Crygb	-0.667487	4.60758	-7.94858	1.98e-05	0.000332311	3.22272
Fgf1	-0.667456	9.02012	-3.90352	0.00341116	0.00865426	-2.16502
Rapgef4	-0.66745	5.25535	-4.59865	0.00120158	0.00391769	-1.07816
Gbas	-0.667184	10.0132	-2.68956	0.024228	0.0419155	-4.16464
Cyp4a14	-0.667088	4.07794	-7.52134	3.1e-05	0.000411758	2.75552
0610040J01Rik	-0.667027	4.87323	-7.16239	4.58e-05	0.000496143	2.34633
Rasa4	-0.666967	5.10315	-5.22961	0.000494882	0.00208537	-0.148856
Figf	-0.66692	4.61233	-7.78728	2.34e-05	0.000360182	3.04879
Top2b	-0.66691	5.66554	-7.20479	4.37e-05	0.000484206	2.39548
Magea7-ps	-0.666852	6.78988	-4.74537	0.000972605	0.00338968	-0.856991
Tmem45b	-0.666715	4.09821	-8.85983	8.05e-06	0.000220036	4.15242
Lsm14a	-0.66648	3.68737	-8.97435	7.23e-06	0.000211487	4.26327
Clip1	-0.666313	7.1559	-4.98617	0.00069212	0.00263672	-0.50062
Golga4	-0.666264	8.92787	-4.12075	0.0024442	0.00671126	-1.81885
Epm2a	-0.666167	5.93117	-6.15062	0.000149936	0.000978945	1.10447
Gnat2	-0.665945	5.50432	-6.40899	0.000109455	0.000822135	1.43456
Eya4	-0.665772	4.27077	-8.50575	1.13e-05	0.000251945	3.80149
Asap1	-0.665627	6.6981	-6.59395	8.78e-05	0.000720305	1.66529
Cyp11b2	-0.665538	5.74366	-5.8278	0.000224888	0.00124706	0.678987
Cnnm1	-0.665521	5.71826	-5.94682	0.000193354	0.00113388	0.837573
Ppara	-0.665208	6.52181	-2.34777	0.0427216	0.0676987	-4.72378
Prkar1a	-0.665008	10.135	-3.50756	0.00636222	0.0141953	-2.80867
Ghitm	-0.66489	10.4613	-3.33149	0.00844379	0.0177787	-3.09899
D2Wsu81e	-0.664406	6.03464	-5.95081	0.000192384	0.00113022	0.842857
Fntb	-0.664002	6.79363	-3.54438	0.00599915	0.0135545	-2.74824
Rpl3l	-0.663852	9.61126	-2.12709	0.061482	0.0921347	-5.07504
Klf3	-0.663852	7.45081	-4.68667	0.00105806	0.00359144	-0.945117
Ccdc136	-0.663849	5.71986	-9.42504	4.79e-06	0.000182963	4.68729
Rdh14	-0.66361	6.49126	-7.50791	3.14e-05	0.000413521	2.74049
Gja1	-0.663555	8.49791	-3.15355	0.0112753	0.0224298	-3.39402
Mrpl55	-0.66287	8.74005	-3.50256	0.00641323	0.0142798	-2.81688
Olfr156	-0.662576	4.77127	-7.13087	4.75e-05	0.000507097	2.30964
Tmem66	-0.662488	11.4687	-3.65224	0.00505508	0.0118121	-2.57182
Tk2	-0.662481	4.87992	-9.25018	5.61e-06	0.000192123	4.52504
Parvb	-0.662474	6.14362	-4.6137	0.00117563	0.00386095	-1.05533
Sptbn4	-0.662337	5.83541	-7.5484	3.01e-05	0.000404636	2.78574
Apoe	-0.662005	8.23208	-3.99572	0.00295884	0.00774773	-2.01743
C80060	-0.661925	4.78881	-9.01081	6.99e-06	0.000209016	4.29828
Serpina1b	-0.66192	5.16191	-6.22534	0.000136773	0.000928034	1.20088
Dtl	-0.661793	4.54948	-8.1175	1.66e-05	0.000305254	3.40173
Akr1c18	-0.661786	6.78686	-8.83398	8.25e-06	0.000222891	4.12724
Ppl	-0.661741	7.39801	-5.31469	0.00044102	0.00193491	-0.0279547
Pigs	-0.6617	7.7046	-9.11962	6.32e-06	0.000201328	4.40203
S100pbp	-0.6616	5.69084	-4.78418	0.000920183	0.00325033	-0.798989
Alb	-0.661411	6.04634	-5.34011	0.000426175	0.00189023	0.00797685
Klhl5	-0.661378	5.94482	-3.63167	0.00522232	0.012129	-2.60539
Ube2a	-0.66119	7.55986	-5.8075	0.000230801	0.00126693	0.651741
Zmat5	-0.660968	6.65357	-7.73099	2.48e-05	0.000368264	2.9874
Mid1	-0.660776	4.79978	-6.90437	6.13e-05	0.000590025	2.04234
Fgf17	-0.660743	4.05175	-7.18573	4.46e-05	0.000490742	2.37341
Maats1	-0.660138	4.91738	-6.39777	0.000110942	0.000826006	1.42041
Casp1	-0.66013	4.26853	-7.95483	1.96e-05	0.000332311	3.22939
Mdp1	-0.659754	7.03237	-6.70095	7.75e-05	0.000673567	1.79668
Agmat	-0.659631	5.99501	-4.66132	0.0010974	0.00367433	-0.983314
Ccdc85a	-0.659543	3.92983	-6.7872	7.01e-05	0.000639492	1.9015
Mavs	-0.659392	5.47562	-6.12761	0.00015426	0.000992989	1.07464
Spi16	-0.659339	4.96635	-7.27645	4.04e-05	0.000466279	2.47805
Chdh	-0.659228	4.35105	-7.6663	2.65e-05	0.000378371	2.9164
Pnn	-0.659222	4.79141	-6.54712	9.28e-05	0.000747658	1.6073
Syt13	-0.659221	5.01982	-4.74325	0.000975554	0.00339453	-0.860159
Vsx2	-0.658998	6.67031	-6.78482	7.03e-05	0.000640024	1.89862
Cyp2b10	-0.658957	5.30748	-9.88043	3.21e-06	0.000160764	5.09698
Tmlhe	-0.658912	4.35073	-5.85389	0.000217527	0.00121711	0.713921
2010107G23Rik	-0.658911	4.51805	-4.53035	0.00132725	0.0042034	-1.18215
Mkrn2	-0.658776	7.559	-3.92698	0.00328956	0.00840623	-2.12738
Cd48	-0.65875	4.71783	-3.9457	0.0031958	0.00823626	-2.09739
Ros1	-0.658633	4.6816	-8.62423	1.01e-05	0.000241374	3.92033
Cnot7	-0.658616	5.94789	-8.47203	1.17e-05	0.000255027	3.7674
Dhrs7b	-0.658548	5.97255	-6.7574	7.26e-05	0.000652017	1.86539
Rpe65	-0.658538	5.84873	-6.334	0.000119818	0.000863885	1.3397
Soat2	-0.65834	5.53472	-8.8204	8.36e-06	0.000222907	4.11397
Tex15	-0.657558	4.27628	-6.87241	6.36e-05	0.000602648	2.00409
Hsd3b2	-0.65752	4.90626	-6.90031	6.16e-05	0.000591895	2.03749
1700067P10Rik	-0.657437	5.33172	-5.38671	0.000400348	0.0018138	0.0735827
Kcnj10	-0.657339	4.89987	-5.58532	0.000307762	0.00153036	0.349648
Ins1	-0.657336	6.68713	-6.15818	0.000148542	0.000975312	1.11427
Tnpo1	-0.65715	6.22731	-7.72464	2.49e-05	0.000369279	2.98045
Dnaja4	-0.657057	7.70512	-4.1642	0.00228832	0.00640363	-1.75029
Blmh	-0.656745	6.99421	-5.39964	0.000393489	0.00179708	0.0917196
Il21r	-0.656228	4.83247	-9.74812	3.6e-06	0.000167999	4.97982
Srsf10	-0.656216	5.01138	-5.10865	0.000584019	0.00234391	-0.32257
Lcmt2	-0.655843	6.44746	-7.06257	5.12e-05	0.00052787	2.22972
6030458C11Rik	-0.655482	6.12939	-5.64296	0.000285434	0.00146286	0.428711
Mgll	-0.655173	8.21672	-2.38086	0.0404422	0.0645728	-4.67031
Kif11	-0.654885	4.68988	-8.9445	7.44e-06	0.000213691	4.2345
Yae1d1	-0.654803	6.91191	-7.60348	2.84e-05	0.000393197	2.84699
Snx10	-0.654509	6.96772	-5.27537	0.000465083	0.00200145	-0.0836984
Dnajc18	-0.65437	5.63877	-7.93025	2.01e-05	0.000335617	3.20309
Sdf2	-0.654326	8.11917	-3.00972	0.0142727	0.0271038	-3.63317
Habp4	-0.654239	6.50332	-6.91638	6.04e-05	0.000584149	2.05668
Trp53rk	-0.654018	4.17136	-7.64602	2.71e-05	0.000381924	2.89404
Calcb	-0.653909	4.09162	-8.35102	1.32e-05	0.000267201	3.64408
Il12a	-0.653707	4.38748	-7.00873	5.44e-05	0.000549651	2.1663
Trp53inp1	-0.653485	5.58387	-3.07628	0.0127951	0.0248068	-3.52246
Gcap8	-0.653459	4.20251	-7.77364	2.37e-05	0.000362904	3.03395
Sobp	-0.653397	6.42469	-6.14891	0.000150251	0.000978945	1.10227
Ehhadh	-0.653294	4.04236	-2.53395	0.0313698	0.0520477	-4.42087
Synj2bp	-0.65327	7.41341	-6.87022	6.37e-05	0.000603082	2.00147
Dmbx1	-0.653268	6.01028	-4.67019	0.00108346	0.00364423	-0.969945
Art2b	-0.652994	3.77292	-7.49683	3.18e-05	0.000416338	2.72807
Dusp19	-0.652959	6.0263	-5.00844	0.000670967	0.00257569	-0.468084
Ikbkg	-0.652958	6.56162	-7.32258	3.84e-05	0.000456529	2.53087
Dnttip1	-0.652929	7.67453	-4.60454	0.00119134	0.00389899	-1.06922
Dmrt1	-0.652692	5.01342	-8.15678	1.6e-05	0.000298858	3.44291
Crybb1	-0.652494	6.10877	-5.08602	0.000602537	0.00239327	-0.355304
Sfrp4	-0.65235	7.09258	-7.46246	3.3e-05	0.00042385	2.68946
Pllp	-0.652299	6.49188	-8.06674	1.75e-05	0.000315198	3.34826
Rag2	-0.652027	5.41411	-7.54549	3.02e-05	0.000404636	2.78249
Ctrc	-0.651971	5.14207	-6.26313	0.000130597	0.000902083	1.24934
P2rx1	-0.651592	5.86867	-6.28309	0.000127459	0.000890213	1.27486
1110007C09Rik	-0.651572	8.5977	-6.83782	6.61e-05	0.00061691	1.96256
Clec4g	-0.651561	6.24206	-8.88771	7.84e-06	0.000217722	4.17953
Sdr42e1	-0.651268	4.98375	-7.67586	2.63e-05	0.000376561	2.92692
Rnf144b	-0.651025	4.82436	-4.06766	0.0026501	0.0071166	-1.90295
C78893	-0.65087	4.2353	-8.355	1.31e-05	0.000267201	3.64817
Mbd3l1	-0.650827	4.6449	-7.41641	3.47e-05	0.000431512	2.63752
Dym	-0.65074	7.63323	-4.71647	0.00101371	0.0034964	-0.900315
Prok2	-0.650731	4.22532	-6.73493	7.45e-05	0.000661408	1.83809
Gm26643	-0.650356	5.73295	-6.72929	7.5e-05	0.000662214	1.83123
Il15ra	-0.650019	7.00708	-7.47538	3.25e-05	0.000422704	2.704
5830428H23Rik	-0.649989	4.65028	-6.06012	0.000167749	0.00104159	0.986668
Dedd2	-0.649963	6.64756	-3.96997	0.00307838	0.00799816	-2.05854
Slc46a1	-0.649909	4.7757	-8.53985	1.09e-05	0.000249464	3.83584
Fpr-rs4	-0.649446	5.17866	-4.76412	0.000946895	0.00332305	-0.828947
Mcoln3	-0.64943	4.56371	-8.04614	1.79e-05	0.000317613	3.32648
B3gnt1	-0.649131	8.15975	-2.73563	0.0224457	0.0392905	-4.08842
Fam89a	-0.648922	5.20523	-8.89396	7.8e-06	0.000217722	4.1856
Lims2	-0.648844	8.41715	-3.62959	0.00523952	0.0121603	-2.60878
Rmnd5a	-0.648738	8.02103	-2.1211	0.0620893	0.0928954	-5.08442
Epcam	-0.648502	5.0227	-7.3856	3.58e-05	0.000437519	2.60261
Cd19	-0.648408	6.59529	-6.79869	6.92e-05	0.000635695	1.91539
Mcpt1	-0.648227	4.38846	-9.50497	4.46e-06	0.000178871	4.76054
Lmod1	-0.648179	5.8277	-6.97552	5.65e-05	0.000560476	2.12701
Lpin3	-0.648102	5.9538	-5.49355	0.000347292	0.00165322	0.2228
Fscn3	-0.648018	5.50742	-6.14266	0.000151417	0.000983421	1.09415
Oprk1	-0.647771	5.98837	-4.81487	0.000880875	0.00314895	-0.753276
Rab37	-0.647689	4.84383	-9.1309	6.25e-06	0.000200465	4.41272
Gstm1	-0.647591	8.88992	-4.53409	0.00132002	0.00418556	-1.17643
Zfyve19	-0.647402	6.87065	-4.70382	0.00103229	0.00353433	-0.919317
Trp73	-0.647207	5.27244	-7.45865	3.31e-05	0.00042385	2.68518
Ube4b	-0.64705	7.28435	-5.3382	0.000427274	0.00189386	0.00527476
Cox4i1	-0.646995	12.7577	-4.93813	0.000740229	0.00277066	-0.571047
Agrp	-0.646985	4.48981	-4.98374	0.000694469	0.00264336	-0.50417
Gins1	-0.646863	6.04567	-5.80181	0.000232489	0.00127192	0.644092
Cacng2	-0.646758	6.24703	-6.13454	0.000152945	0.000990383	1.08362
Otof	-0.646643	6.71365	-6.97773	5.64e-05	0.000560476	2.12962
Slc20a2	-0.646565	8.94399	-4.63332	0.00114269	0.00377848	-1.02562
H2-T18	-0.64632	4.80095	-7.74135	2.45e-05	0.00036779	2.99873
Cnih3	-0.646274	5.30761	-6.74117	7.39e-05	0.000658413	1.84568
Tfb1m	-0.645763	4.27323	-8.51676	1.12e-05	0.000251721	3.81259
Fggy	-0.645598	5.42774	-4.54481	0.00129952	0.00414473	-1.16008
Neurod4	-0.645548	4.31178	-7.89337	2.09e-05	0.000343379	3.16351
Sdhaf2	-0.645386	7.66596	-6.88953	6.23e-05	0.00059659	2.0246
Cs	-0.645291	11.1987	-3.32806	0.00849072	0.0178429	-3.10466
Gcm1	-0.64525	5.07911	-7.46352	3.29e-05	0.00042385	2.69065
C87436	-0.645231	4.80298	-8.78685	8.63e-06	0.000224586	4.08113
Epb4.1l5	-0.644642	4.95707	-6.98383	5.6e-05	0.000559717	2.13685
Tpp2	-0.644441	5.3948	-7.08659	4.99e-05	0.000521542	2.2579
Col14a1	-0.644122	5.49801	-6.22354	0.000137075	0.000929118	1.19856
Rhot1	-0.644117	8.37552	-3.48675	0.00657747	0.0145635	-2.84287
Irf6	-0.64402	4.16002	-6.65127	8.21e-05	0.000694755	1.73586
Smg8	-0.643971	4.85934	-6.26547	0.000130225	0.000900013	1.25234
Snap23	-0.64369	5.34499	-5.3127	0.000442201	0.00193749	-0.0307598
Upk3b	-0.643628	5.78631	-6.43497	0.000106096	0.000810502	1.46725
Clca4	-0.643436	4.53868	-7.09716	4.93e-05	0.000518893	2.27026
Nrtn	-0.643427	8.22285	-4.42294	0.00155413	0.00473792	-1.34697
Sypl	-0.643352	7.11908	-5.48598	0.000350788	0.00166435	0.212286
Il25	-0.643277	5.09918	-5.94775	0.000193129	0.00113358	0.838799
Aldoart2	-0.643248	4.85259	-5.96548	0.000188862	0.00111657	0.862248
Insig2	-0.643061	6.18647	-4.64934	0.00111654	0.00372028	-1.0014
Sva	-0.64288	4.86754	-8.28993	1.4e-05	0.000278704	3.58125
4933428G20Rik	-0.642625	3.97335	-7.61729	2.79e-05	0.000389953	2.86228
Ptcd2	-0.642292	7.73315	-5.29212	0.000454662	0.00197748	-0.0599211
Nodal	-0.642286	5.60523	-7.73513	2.47e-05	0.000368129	2.99193
H2afb1	-0.642091	4.1645	-7.47301	3.26e-05	0.000423365	2.70133
Mettl5	-0.641842	6.53558	-7.66614	2.65e-05	0.000378371	2.91622
Pbld1	-0.641808	4.42093	-6.93545	5.91e-05	0.000576517	2.07941
Heyl	-0.641461	6.45799	-7.36608	3.66e-05	0.00044451	2.58044
Ints4	-0.641328	7.05769	-3.60548	0.00544363	0.0125274	-2.64817
Urod	-0.641002	7.4573	-4.69736	0.00104191	0.00355013	-0.929031
Cdon	-0.640841	5.14884	-5.09048	0.000598832	0.00238509	-0.348836
Tmem208	-0.640812	7.74413	-3.22427	0.0100477	0.0203796	-3.27662
Pla2g12b	-0.640763	5.17453	-5.35914	0.000415419	0.00185381	0.0348027
Prss12	-0.640679	6.14029	-4.20494	0.00215173	0.00611146	-1.68621
Rabggtb	-0.640302	8.75151	-4.20159	0.00216263	0.00613435	-1.69147
Eef1a2	-0.640064	12.3321	-5.4044	0.000390991	0.00178817	0.0984037
Nr6a1	-0.640017	5.39646	-6.16005	0.000148201	0.000973679	1.11668
Ercc5	-0.639954	6.24322	-4.3408	0.00175543	0.00520617	-1.47406
Esrp1	-0.639887	4.13872	-8.24378	1.47e-05	0.000284456	3.53351
Cacna1h	-0.639701	4.94096	-7.29382	3.96e-05	0.000462234	2.49796
Osr1	-0.639532	5.04514	-6.28657	0.00012692	0.00088844	1.27931
Epha5	-0.639416	4.55326	-7.43194	3.41e-05	0.000427774	2.65507
1190005I06Rik	-0.639408	4.91265	-7.70213	2.55e-05	0.000371763	2.95578
Rom1	-0.638933	5.63979	-3.33412	0.00840799	0.0177233	-3.09464
Asrgl1	-0.638889	7.33755	-3.17207	0.0109396	0.0218657	-3.36326
Prg2	-0.638851	4.63862	-6.83757	6.61e-05	0.00061691	1.96226
Arhgap27	-0.638842	7.41219	-6.42489	0.000107386	0.000815109	1.45457
Prlr	-0.638798	4.72194	-8.45236	1.19e-05	0.000256154	3.74745
Ogdh	-0.638735	10.7989	-2.01274	0.0741229	0.10845	-5.25255
Tspan13	-0.638717	7.82013	-3.95242	0.00316283	0.00817686	-2.08663
Mecom	-0.638656	4.6584	-10.0454	2.78e-06	0.000151932	5.24097
5730493B19Rik	-0.638557	5.29188	-5.68811	0.00026917	0.00140589	0.490299
Polr2j	-0.638524	8.04681	-3.43939	0.00709631	0.0154605	-2.92084
Lepr	-0.638353	5.1304	-7.17723	4.51e-05	0.000492492	2.36355
Decr2	-0.638256	6.11953	-4.6458	0.00112227	0.00373474	-1.00675
Inpp5e	-0.638139	6.22818	-8.78323	8.66e-06	0.000224586	4.07757
Nr1h4	-0.638049	4.60083	-5.94355	0.000194155	0.00113538	0.833237
Ndufb9	-0.637984	9.90851	-5.74204	0.000251048	0.00134029	0.563471
Foxo3	-0.637965	6.90579	-4.9649	0.000712997	0.00269522	-0.531766
Rgs6	-0.637794	4.90065	-6.70192	7.74e-05	0.000673567	1.79786
Cecr5	-0.637603	7.79244	-8.23557	1.48e-05	0.000285495	3.525
Sycp1	-0.637558	4.26335	-8.03057	1.82e-05	0.000320294	3.31
Cdh17	-0.637557	5.43194	-4.7515	0.000964113	0.00337168	-0.847811
Erv3	-0.637538	5.38344	-4.89731	0.000783933	0.0028903	-0.631153
Hmgcs1	-0.637427	6.04091	-3.91604	0.00334571	0.00852965	-2.14493
Adam1a	-0.637282	4.92892	-7.34893	3.73e-05	0.000448632	2.56093
Pam	-0.637032	6.00753	-4.12919	0.00241307	0.00665801	-1.80552
Cxcr6	-0.637006	4.28734	-4.53725	0.00131394	0.00417543	-1.17161
Snrpn	-0.63697	6.57776	-7.84606	2.2e-05	0.000351786	3.11252
Dolpp1	-0.636838	8.05352	-5.84066	0.000221226	0.0012323	0.696222
Cd7	-0.636745	6.20349	-6.43607	0.000105956	0.000810381	1.46863
Olfr73	-0.636592	4.73253	-6.61441	8.57e-05	0.000711192	1.69052
Leprel4	-0.636566	8.03474	-7.68052	2.61e-05	0.000375516	2.93205
Mlst8	-0.636285	5.97818	-6.93511	5.92e-05	0.000576517	2.079
Ptms	-0.636194	8.34074	-7.59748	2.85e-05	0.000395221	2.84033
C80256	-0.636057	5.43237	-5.9798	0.000185489	0.00110728	0.881164
Gm16793	-0.635835	4.37584	-7.0267	5.33e-05	0.000543398	2.18751
Rgl3	-0.635757	6.1955	-6.36125	0.000115935	0.000848886	1.37426
Dntt	-0.635644	4.7587	-7.52815	3.07e-05	0.000409181	2.76313
Sdhb	-0.635633	12.4901	-4.05448	0.00270398	0.00723359	-1.92387
[truncated: 11,049 more rows]
