# Supplementary material for: Identification of Differentially Expressed Genes and Signaling Pathways in Acute Myocardial Infarction Based on Integrated Bioinformatics Analysis
Source: Cardiovasc Ther. 2019 Aug 1;2019:8490707. doi: 10.1155/2019/8490707 (PMC6739802; doi:10.1155/2019/8490707)
Supplement: Supplementary Materials — A PPI network: there were 56 nodes and 240 edges in this network, including 2 down- and 54 upregulated genes (see the supplementary document). [file 8490707.f1.zip › DEGs, GSE775, GSE19322, and GSE97494/GSE97494, DEGs.xlsx]

## Sheet: GSE97494
Gene	logFC	AveExpr	t	P.Value	adj.P.Val	B
Mup2	-8.23198	6.71282	-16.0089	1.72e-05	0.000567583	3.89641
Alb	-7.25306	6.62758	-17.0469	1.26e-05	0.000557592	4.22673
Mup20	-6.31441	5.56816	-12.0616	6.88e-05	0.000878728	2.37323
Mup3	-5.37405	5.09475	-13.3979	4.12e-05	0.000723688	2.94355
Lgi1	-4.8414	5.9876	-28.6528	9.62e-07	0.000507439	6.75187
Serpina1e	-4.59974	6.64265	-12.144	6.66e-05	0.000866261	2.41032
Car3	-4.56216	5.84798	-9.95334	0.000174085	0.00135616	1.32377
Gc	-4.22215	5.71263	-10.1021	0.00016212	0.0013133	1.40487
Itgb6	-4.04673	7.14808	-17.8333	1.01e-05	0.000557592	4.46147
Fmod	-4.00068	5.63983	-25.9547	1.57e-06	0.000507439	6.30735
Cyp2e1	-3.93215	5.09729	-10.5245	0.000133126	0.00118018	1.62885
Hnrnpc	-3.87367	6.92499	-6.15325	0.00164421	0.00568114	-1.26127
Ano4	-3.73096	5.08728	-32.3502	5.26e-07	0.000507439	7.26704
Ttr	-3.67005	5.52602	-12.5459	5.68e-05	0.000826725	2.58743
Mup10	-3.55911	3.96415	-10.6757	0.000124276	0.00114121	1.70688
Mrgprh	-3.55687	6.64648	-12.4595	5.88e-05	0.000834829	2.54987
Ar	-3.55612	5.87703	-31.5954	5.91e-07	0.000507439	7.16962
Ecm2	-3.50214	6.51079	-13.8309	3.53e-05	0.000683701	3.11524
Serpina1b	-3.50174	4.46139	-6.7712	0.00106464	0.00416778	-0.758641
1810034E14Rik	-3.50073	5.44558	-30.4523	7.11e-07	0.000507439	7.01482
Apoa1	-3.47427	6.11422	-10.863	0.00011427	0.00109073	1.80197
Rgs7bp	-3.44313	5.73439	-30.0917	7.54e-07	0.000507439	6.96407
Ttn	-3.4417	7.20916	-35.3164	3.4e-07	0.000507439	7.61648
Fabp1	-3.43094	4.31095	-11.5329	8.55e-05	0.000958886	2.12882
B3galt2	-3.38246	6.06826	-10.1366	0.000159485	0.00129891	1.42353
Gulp1	-3.36457	5.01539	-29.0638	8.96e-07	0.000507439	6.81413
Inmt	-3.34167	5.86468	-25.9468	1.58e-06	0.000507439	6.30595
Cyp3a11	-3.34158	4.2651	-7.54796	0.00064465	0.00295149	-0.179074
Serpina1a	-3.33267	4.16427	-8.94869	0.000289338	0.00179194	0.742869
Serpina1c	-3.32973	4.75273	-6.20604	0.00158214	0.00552743	-1.21676
Lsmem1	-3.32863	7.15057	-29.9374	7.74e-07	0.000507439	6.94208
Slc16a7	-3.28144	6.11	-28.557	9.78e-07	0.000507439	6.73717
Hspa12a	-3.2685	6.4022	-17.621	1.07e-05	0.000557592	4.39936
Fgg	-3.20865	4.60063	-9.43032	0.000225405	0.00154662	1.02883
Myl4	-3.19922	7.85137	-4.17728	0.00866367	0.0198819	-3.17606
Pcsk6	-3.13278	8.04846	-33.0937	4.69e-07	0.000507439	7.35947
Lrtm1	-3.12985	10.0193	-14.5934	2.71e-05	0.000618789	3.40361
Myl7	-3.12543	5.91782	-3.41496	0.018919	0.0369567	-4.06339
Slc2a12	-3.1204	6.11262	-25.1293	1.85e-06	0.000507439	6.15768
Fndc5	-3.12022	10.0049	-28.5536	9.79e-07	0.000507439	6.73664
Abca8b	-3.11862	5.54242	-20.3353	5.28e-06	0.000517706	5.13134
Asb15	-3.10402	8.66923	-22.4642	3.23e-06	0.000517706	5.62339
D630028G08Rik	-3.09216	5.03503	-25.4945	1.72e-06	0.000507439	6.22476
Grm1	-3.05196	7.30684	-19.7667	6.08e-06	0.000517706	4.9885
Sfrp2	-3.0318	5.82471	-24.7103	2.01e-06	0.000507439	6.07903
Abca6	-3.00747	5.64886	-20.4069	5.19e-06	0.000517706	5.14895
BC023105	-2.98435	5.10358	-5.08834	0.00379938	0.0105768	-2.22894
5730407I07Rik	-2.94004	4.54998	-30.3073	7.28e-07	0.000507439	6.99453
Krt222	-2.93264	6.83557	-28.7055	9.54e-07	0.000507439	6.75992
Npas2	-2.9284	6.89327	-27.0573	1.28e-06	0.000507439	6.49689
A530016L24Rik	-2.92482	7.30816	-21.7663	3.77e-06	0.000517706	5.46908
G630090E17Rik	-2.91654	5.88059	-9.98517	0.000171439	0.00134685	1.34122
Smco1	-2.91471	6.06894	-9.61386	0.000205568	0.00146903	1.13411
Meig1	-2.9022	6.07713	-25.1067	1.86e-06	0.000507439	6.15349
Gm10115	-2.89696	4.5797	-23.3058	2.69e-06	0.000517706	5.80114
Reep1	-2.8802	6.07228	-28.4298	1e-06	0.000507439	6.71753
Stxbp4	-2.85853	5.46928	-18.8334	7.72e-06	0.000538869	4.74247
Cpxm2	-2.836	6.89462	-11.4483	8.87e-05	0.000972398	2.08864
Fndc1	-2.83032	5.52012	-30.2576	7.34e-07	0.000507439	6.98754
Gpr155	-2.79649	7.02334	-19.133	7.14e-06	0.000538869	4.82309
Pfkfb2	-2.78815	8.12018	-21.7467	3.79e-06	0.000517706	5.46466
Asb14	-2.7793	8.35865	-25.5101	1.72e-06	0.000507439	6.22758
2310040G07Rik	-2.77566	9.76504	-29.3192	8.58e-07	0.000507439	6.85214
Kng1	-2.77398	4.183	-9.34551	0.000235337	0.00158179	0.979505
Kcnd2	-2.77065	7.83424	-28.1531	1.05e-06	0.000507439	6.67434
Pde7b	-2.75709	7.31164	-19.8778	5.91e-06	0.000517706	5.01682
Rbfox1	-2.75122	7.60971	-21.7108	3.82e-06	0.000517706	5.45652
Pxmp4	-2.7462	8.52488	-23.3551	2.66e-06	0.000517706	5.81128
Klhdc8a	-2.73676	6.15936	-27.3398	1.22e-06	0.000507439	6.54365
Aplnr	-2.73509	7.85376	-9.97379	0.000172379	0.00134849	1.33499
mt-Th	-2.72747	9.73193	-11.9619	7.16e-05	0.000894608	2.328
Ttc30a2	-2.72513	6.1425	-20.8295	4.69e-06	0.000517706	5.25138
Ctnnal1	-2.72414	7.099	-20.1802	5.49e-06	0.000517706	5.09287
Sfrp1	-2.72125	7.01064	-13.4158	4.1e-05	0.000723517	2.9508
Islr	-2.71974	7.81619	-20.7864	4.74e-06	0.000517706	5.24105
Yipf7	-2.71924	8.09016	-21.2922	4.21e-06	0.000517706	5.36046
Idua	-2.71679	7.3619	-26.011	1.56e-06	0.000507439	6.31731
Lmod3	-2.71647	8.26568	-10.9043	0.000112197	0.00107988	1.82269
Tmem56	-2.70996	4.882	-15.1381	2.27e-05	0.000586199	3.59947
Ccdc53	-2.70455	7.95668	-18.9017	7.59e-06	0.000538869	4.76099
Kcnn2	-2.70353	5.51903	-27.9914	1.08e-06	0.000507439	6.64881
Penk	-2.6988	6.76687	-25.7385	1.64e-06	0.000507439	6.2688
Pcdh18	-2.69798	6.16686	-10.7187	0.000121892	0.00112788	1.72884
Galm	-2.69306	6.98269	-24.8799	1.94e-06	0.000507439	6.11108
Fgb	-2.68199	5.06405	-7.61251	0.000619575	0.00287421	-0.133294
Apoc1	-2.67962	4.6924	-11.7095	7.95e-05	0.000930215	2.21174
Mylk4	-2.67033	9.10255	-9.7801	0.000189372	0.00140603	1.22779
Smim20	-2.66885	9.05315	-25.6298	1.68e-06	0.000507439	6.24926
Nmnat1	-2.66592	8.58652	-22.3899	3.28e-06	0.000517706	5.60728
1700040L02Rik	-2.66235	7.2416	-19.8698	5.93e-06	0.000517706	5.0148
Ky	-2.66167	5.63642	-13.8039	3.56e-05	0.000684435	3.10474
Kdm5d	-2.65716	5.88686	-21.5645	3.95e-06	0.000517706	5.42324
Cacna1g	-2.65062	6.57473	-14.3835	2.91e-05	0.000632698	3.32596
Itga8	-2.64772	5.46736	-5.35887	0.00303523	0.00895107	-1.96982
D7Ertd443e	-2.64048	4.43519	-20.0044	5.73e-06	0.000517706	5.04883
Gm13304	-2.64016	7.36968	-26.4066	1.44e-06	0.000507439	6.38642
Pm20d1	-2.6227	5.80288	-16.2447	1.6e-05	0.000563494	3.97363
Kcnj3	-2.62141	8.59646	-28.1593	1.05e-06	0.000507439	6.67531
Mir145a	-2.60327	4.84573	-16.187	1.63e-05	0.000563494	3.95486
1700112E06Rik	-2.59453	4.77468	-12.9333	4.9e-05	0.000778825	2.7525
Wnt5a	-2.59453	5.92499	-27.5452	1.17e-06	0.000507439	6.57718
Pzp	-2.59069	5.00598	-7.668	0.000598939	0.00281135	-0.0942126
Tet1	-2.58572	5.86296	-25.7245	1.65e-06	0.000507439	6.2663
Klhdc1	-2.57634	6.99367	-14.7085	2.61e-05	0.000611527	3.44568
Itih5	-2.57576	4.96168	-9.92197	0.000176741	0.00136111	1.30651
Gm10403	-2.574	4.06074	-19.5785	6.37e-06	0.000517706	4.94009
Uty	-2.56305	6.88659	-5.35368	0.00304809	0.00898023	-1.9747
Cyfip2	-2.56188	9.58067	-23.8994	2.37e-06	0.000517706	5.92133
Cml2	-2.55749	4.17667	-17.4898	1.11e-05	0.000557592	4.36051
Epha4	-2.55089	7.63124	-17.9352	9.83e-06	0.000557592	4.49098
Smim8	-2.54647	9.05143	-25.7728	1.63e-06	0.000507439	6.27495
Mtfp1	-2.54463	8.96565	-25.7485	1.64e-06	0.000507439	6.2706
Actr3b	-2.54171	6.6336	-23.0617	2.83e-06	0.000517706	5.75049
Pank1	-2.53703	8.84251	-26.0819	1.54e-06	0.000507439	6.3298
Spon2	-2.53429	5.07065	-13.4503	4.05e-05	0.000718346	2.96468
Fn3k	-2.53417	6.29457	-21.1252	4.37e-06	0.000517706	5.32145
Prkce	-2.53414	8.11029	-26.9374	1.31e-06	0.000507439	6.47683
Mup-ps14	-2.53357	3.21025	-21.81	3.73e-06	0.000517706	5.47894
Scn7a	-2.51878	7.8276	-21.822	3.72e-06	0.000517706	5.48163
mt-Ts2	-2.51071	8.79344	-8.67491	0.000335287	0.00194929	0.573712
Chad	-2.50642	5.66552	-10.5633	0.000130783	0.00117033	1.649
Dkk3	-2.5028	5.65484	-5.93032	0.00194011	0.00642165	-1.45264
AI317395	-2.50247	5.87454	-22.6014	3.13e-06	0.000517706	5.65298
Efnb3	-2.49898	7.5145	-12.8311	5.09e-05	0.000789832	2.70947
Kcnip2	-2.49642	8.69196	-18.8962	7.6e-06	0.000538869	4.7595
Abca8a	-2.49472	7.642	-15.5497	1.99e-05	0.000579157	3.74221
Zbtb20	-2.48875	10.0637	-24.6294	2.04e-06	0.000507439	6.06361
Dhrs7	-2.48797	7.32368	-26.5713	1.4e-06	0.000507439	6.41476
Tmc7	-2.48754	6.34871	-23.2232	2.73e-06	0.000517706	5.78408
Hist1h4d	-2.48418	10.2966	-18.5745	8.27e-06	0.000538869	4.67151
Mir568	-2.48418	8.45966	-17.1889	1.21e-05	0.000557592	4.27008
Aspn	-2.46858	8.55222	-18.1736	9.21e-06	0.000550354	4.55922
Prelp	-2.46699	8.80932	-12.5978	5.57e-05	0.000820172	2.60983
Zfp418	-2.46549	5.04811	-13.8913	3.45e-05	0.000674697	3.13875
Zfp708	-2.46034	5.37357	-16.6744	1.41e-05	0.000563494	4.111
Gm10644	-2.45902	5.75162	-12.8823	4.99e-05	0.000782662	2.73108
Enpp2	-2.45364	6.0845	-16.8406	1.34e-05	0.000557592	4.16303
Fam171b	-2.45042	4.84208	-14.039	3.28e-05	0.000661386	3.19568
Mfap4	-2.44947	6.59254	-11.4199	8.97e-05	0.000975754	2.0751
Efcab2	-2.44821	8.17754	-17.236	1.2e-05	0.000557592	4.28435
Eid2b	-2.44049	6.97512	-24.0408	2.3e-06	0.000517706	5.94936
Wdr35	-2.43664	5.9295	-25.0996	1.86e-06	0.000507439	6.15217
Abca9	-2.43599	6.49506	-11.7448	7.83e-05	0.000929249	2.22814
Prr33	-2.43351	4.76085	-17.3464	1.16e-05	0.000557592	4.31763
D830015G02Rik	-2.42734	8.20801	-17.7086	1.05e-05	0.000557592	4.4251
D3Ertd751e	-2.41804	6.21642	-15.7377	1.87e-05	0.000575525	3.80597
Pla2g5	-2.41782	9.59792	-24.868	1.95e-06	0.000507439	6.10885
Amacr	-2.41748	8.00234	-15.4161	2.07e-05	0.000582741	3.69635
Vstm4	-2.41696	7.4488	-22.2761	3.36e-06	0.000517706	5.58243
Pkd2l2	-2.4164	5.42824	-20.1207	5.57e-06	0.000517706	5.07803
Cep68	-2.41417	8.41604	-25.4225	1.74e-06	0.000507439	6.21164
Cc2d2a	-2.41372	5.63487	-25.3133	1.78e-06	0.000507439	6.19165
Lgals4	-2.41028	6.10254	-17.4606	1.12e-05	0.000557592	4.35182
St3gal3	-2.40797	9.45358	-24.9258	1.92e-06	0.000507439	6.1197
Hcn4	-2.4058	6.4317	-22.1562	3.45e-06	0.000517706	5.55609
Map3k4	-2.40455	7.58212	-16.1647	1.64e-05	0.000563494	3.94757
AI464131	-2.40151	5.96367	-21.486	4.02e-06	0.000517706	5.40525
Mfsd7c	-2.40131	5.64361	-21.1912	4.31e-06	0.000517706	5.33691
Hrsp12	-2.40112	4.65224	-21.571	3.94e-06	0.000517706	5.42473
Cyp3a41b	-2.39633	3.9736	-5.0355	0.00397377	0.0109302	-2.28068
Gm10808	-2.39479	5.70224	-25.6309	1.68e-06	0.000507439	6.24946
Gm26315	-2.39326	4.26439	-17.1295	1.23e-05	0.000557592	4.25199
Adamts5	-2.39297	7.31111	-15.0998	2.29e-05	0.000586199	3.58596
Tmem25	-2.3921	6.29221	-25.3753	1.76e-06	0.000507439	6.20301
Cyp39a1	-2.38743	6.50692	-17.2149	1.2e-05	0.000557592	4.27796
Aqp7	-2.38571	9.58569	-16.6961	1.4e-05	0.000563494	4.11781
Lrrc10	-2.38091	9.4238	-24.6847	2.02e-06	0.000507439	6.07415
Hmcn1	-2.37792	5.75386	-21.4965	4.01e-06	0.000517706	5.40765
Cacna1c	-2.36454	9.5665	-18.6131	8.19e-06	0.000538869	4.68218
Prlr	-2.36175	5.1881	-15.857	1.8e-05	0.000570755	3.84599
Phkg1	-2.3613	6.03455	-13.6782	3.73e-05	0.000698413	3.0554
Antxr1	-2.35785	6.94236	-21.3744	4.13e-06	0.000517706	5.37951
Ccdc69	-2.35711	6.61294	-24.9195	1.93e-06	0.000507439	6.11854
Vtn	-2.35487	7.44482	-15.3607	2.11e-05	0.000582741	3.6772
Eapp	-2.35001	7.71569	-21.1808	4.32e-06	0.000517706	5.33448
Hrasls	-2.34927	6.92692	-18.2417	9.04e-06	0.000544066	4.57851
Mme	-2.34894	6.1051	-16.4416	1.51e-05	0.000563494	4.03707
Prox1	-2.34893	8.28791	-16.6288	1.43e-05	0.000563494	4.0966
Kctd12b	-2.3475	5.93008	-23.4769	2.59e-06	0.000517706	5.8362
Thra	-2.34115	9.54683	-24.0667	2.29e-06	0.000517706	5.95447
P2ry1	-2.33466	7.63541	-20.3388	5.28e-06	0.000517706	5.1322
Mmp15	-2.33245	8.52953	-14.7648	2.56e-05	0.000608403	3.46615
Nceh1	-2.32789	10.5067	-24.8188	1.97e-06	0.000507439	6.09958
Gm10524	-2.32678	8.29565	-14.9415	2.42e-05	0.000593582	3.52972
Irs1	-2.32578	6.99377	-14.2898	3.01e-05	0.000637739	3.29086
Akr1c14	-2.32201	5.67769	-18.5911	8.23e-06	0.000538869	4.67609
Fam213a	-2.32192	9.61628	-16.7957	1.36e-05	0.000557592	4.14902
Clec3a	-2.32063	5.43303	-11.6213	8.24e-05	0.000941885	2.17052
Lyrm9	-2.3183	5.88552	-16.9876	1.29e-05	0.000557592	4.20853
Atp1a2	-2.31281	10.7604	-7.69507	0.000589165	0.00278521	-0.0752337
Npnt	-2.31097	5.56779	-6.18983	0.0016009	0.00557607	-1.2304
Fblim1	-2.31082	9.02846	-23.0326	2.85e-06	0.000517706	5.74441
Grb14	-2.30814	9.13482	-24.2266	2.22e-06	0.000517706	5.98585
Myh11	-2.30302	7.08147	-9.15911	0.000259055	0.00167335	0.869575
Pde4a	-2.30142	7.4664	-15.005	2.37e-05	0.000592291	3.55237
Nfia	-2.30064	8.97968	-24.5985	2.06e-06	0.000507439	6.05771
Ccdc28a	-2.29859	5.28759	-11.1989	9.86e-05	0.00101568	1.96837
Ccdc141	-2.29711	9.12146	-23.2927	2.69e-06	0.000517706	5.79844
Asph	-2.29356	8.86931	-23.0634	2.83e-06	0.000517706	5.75084
Fsd2	-2.29083	10.1257	-23.485	2.59e-06	0.000517706	5.83786
Akap1	-2.29064	8.72694	-23.5652	2.54e-06	0.000517706	5.85417
Prps2	-2.28385	7.44599	-15.2748	2.17e-05	0.000583843	3.64736
Tpmt	-2.28332	6.75024	-23.8249	2.41e-06	0.000517706	5.90647
Rbp4	-2.28061	5.36888	-5.30232	0.00317886	0.00925506	-2.0232
Tceal1	-2.27982	6.43172	-15.6062	1.95e-05	0.00057831	3.76147
Kcnv2	-2.2798	5.59816	-14.6164	2.69e-05	0.000617117	3.41207
Dok4	-2.27869	6.39379	-21.4436	4.06e-06	0.000517706	5.3955
Cdc14b	-2.27718	6.98646	-19.3384	6.78e-06	0.000527187	4.87746
Ppp2r3a	-2.27641	8.82621	-23.3933	2.64e-06	0.000517706	5.81913
Acyp1	-2.27609	6.17527	-18.3524	8.78e-06	0.000540695	4.60968
Fhod3	-2.2759	9.37872	-21.1633	4.34e-06	0.000517706	5.33038
Gm10759	-2.27054	3.7357	-15.796	1.84e-05	0.000573386	3.82556
Ndufa12	-2.27005	9.00075	-23.7218	2.46e-06	0.000517706	5.88581
Raver2	-2.26599	5.17632	-15.2462	2.19e-05	0.000585508	3.63739
Fto	-2.26478	7.9383	-14.9563	2.41e-05	0.000593582	3.53501
Ano5	-2.26128	4.38966	-12.038	6.95e-05	0.000883473	2.36257
Necab1	-2.25843	4.69611	-12.4275	5.95e-05	0.000837958	2.53585
Hist1h2ak	-2.25696	6.90456	-13.9449	3.39e-05	0.000668105	3.15949
Gm25831	-2.25554	4.82298	-16.9309	1.31e-05	0.000557592	4.19102
Nt5c1a	-2.25473	6.90513	-23.4519	2.6e-06	0.000517706	5.83112
Lrrc1	-2.25398	6.03357	-7.65342	0.000604279	0.00282996	-0.104452
Fbxo8	-2.25297	8.86707	-23.7119	2.47e-06	0.000517706	5.88381
Dhrs11	-2.25117	9.97462	-22.7824	3.01e-06	0.000517706	5.69165
Rnaset2a	-2.24889	8.83877	-19.1494	7.11e-06	0.000538869	4.82745
Lonrf2	-2.24791	5.20958	-23.4817	2.59e-06	0.000517706	5.8372
Tstd3	-2.24726	7.72069	-9.60572	0.000206403	0.00147238	1.12948
Mospd1	-2.24671	8.33699	-9.54731	0.000212511	0.00149307	1.09616
Dnajc28	-2.24543	7.31819	-18.5526	8.32e-06	0.000538869	4.66545
Arsk	-2.24516	6.2608	-6.38852	0.00138785	0.00502271	-1.06523
Ces3a	-2.24141	4.51832	-6.78324	0.001056	0.00414632	-0.749226
Mpped2	-2.23596	7.97595	-16.1753	1.64e-05	0.000563494	3.95104
Ago4	-2.23361	6.18688	-19.5853	6.36e-06	0.000517706	4.94185
AW112010	-2.22793	7.20732	-7.73627	0.000574657	0.0027399	-0.0464761
Kcnj5	-2.22631	8.18452	-10.8778	0.000113523	0.00108651	1.8094
Acacb	-2.22365	9.68274	-21.6084	3.91e-06	0.000517706	5.43326
Klhl33	-2.22159	5.30421	-19.2959	6.85e-06	0.000529552	4.86627
Rasgrp3	-2.22123	8.28267	-11.9031	7.34e-05	0.000905755	2.30116
Gabra3	-2.22039	5.69153	-11.663	8.1e-05	0.000937679	2.19003
Creg1	-2.21946	10.1435	-19.9715	5.78e-06	0.000517706	5.04055
Nrn1	-2.21919	6.52027	-8.65733	0.000338522	0.00195797	0.562682
Scn4a	-2.21808	7.21159	-16.3658	1.54e-05	0.000563494	4.01276
Napepld	-2.21792	7.75436	-16.1455	1.65e-05	0.000563494	3.9413
Auts2	-2.21757	7.16075	-21.3118	4.19e-06	0.000517706	5.36502
Extl1	-2.21598	7.47885	-23.1824	2.76e-06	0.000517706	5.77562
Scnm1	-2.21283	8.29202	-19.8228	6e-06	0.000517706	5.00282
Plxnb1	-2.21163	7.07009	-21.0169	4.49e-06	0.000517706	5.29594
Ptgr2	-2.20881	9.36747	-19.8089	6.02e-06	0.000517706	4.99929
Dpt	-2.20509	9.47564	-17.537	1.1e-05	0.000557592	4.37451
Acsm5	-2.20317	5.47164	-19.498	6.51e-06	0.000521272	4.91919
Ctdsp1	-2.20119	9.59618	-22.3512	3.31e-06	0.000517706	5.59884
Shisa6	-2.20062	5.09701	-8.5563	0.000357856	0.00202314	0.498868
Ackr4	-2.2001	4.94651	-15.9771	1.74e-05	0.000567615	3.88591
Gal3st3	-2.19985	7.30355	-23.0662	2.83e-06	0.000517706	5.75144
Nr3c2	-2.19953	6.64443	-21.3095	4.19e-06	0.000517706	5.36449
Ebf2	-2.1976	6.2168	-18.7912	7.81e-06	0.000538869	4.73098
Comp	-2.19692	5.33982	-12.9708	4.83e-05	0.000772462	2.7682
Zfp799	-2.19512	5.10376	-8.37174	0.000396679	0.00215938	0.380451
Rtn4ip1	-2.19122	9.36195	-20.6903	4.85e-06	0.000517706	5.21795
Zfp563	-2.1886	5.37293	-22.723	3.05e-06	0.000517706	5.67901
Ogn	-2.18619	9.21692	-19.0411	7.32e-06	0.000538869	4.79853
Itih2	-2.18207	4.18547	-8.80316	0.000312757	0.0018714	0.653573
Fv1	-2.18203	6.92909	-6.90839	0.000971037	0.00391017	-0.652257
Srr	-2.17949	7.28382	-15.9585	1.75e-05	0.000567615	3.87973
Rassf9	-2.1786	6.24053	-12.8029	5.15e-05	0.000794126	2.69753
Gdpd5	-2.1784	7.24033	-18.5285	8.37e-06	0.000538869	4.65878
C530005A16Rik	-2.17272	5.17128	-22.9228	2.92e-06	0.000517706	5.72135
Coro6	-2.17151	10.1959	-20.9661	4.54e-06	0.000517706	5.28389
F830001A07Rik	-2.17144	5.01186	-11.2545	9.63e-05	0.00100215	1.99542
Rxrg	-2.17124	9.29473	-23.0364	2.85e-06	0.000517706	5.74521
Nqo2	-2.1699	8.19741	-20.3932	5.21e-06	0.000517706	5.14559
Fgf16	-2.16966	8.74269	-12.2528	6.37e-05	0.000850301	2.45887
Adck3	-2.16699	10.3352	-21.299	4.2e-06	0.000517706	5.36206
Hdac9	-2.16676	7.14087	-12.4738	5.84e-05	0.000834589	2.55607
Sema6a	-2.16599	7.99968	-11.8074	7.63e-05	0.000923387	2.25716
Ank	-2.16271	9.4452	-22.544	3.17e-06	0.000517706	5.64062
Nrbp2	-2.16087	7.55898	-18.7526	7.89e-06	0.000538869	4.72045
Atxn1	-2.15782	8.09776	-18.7895	7.81e-06	0.000538869	4.73054
Pon1	-2.15537	4.0107	-4.82497	0.00476803	0.0125384	-2.49061
Glrp1	-2.15518	3.76351	-19.7892	6.05e-06	0.000517706	4.99425
Hdac11	-2.15504	6.50134	-19.8379	5.97e-06	0.000517706	5.00668
2310067B10Rik	-2.15455	8.87777	-21.7977	3.74e-06	0.000517706	5.47615
Plekha5	-2.15363	6.19194	-17.5077	1.11e-05	0.000557592	4.36582
Igfbp5	-2.15333	8.25547	-14.8262	2.51e-05	0.000602047	3.48833
Ank2	-2.15202	8.84078	-22.77	3.02e-06	0.000517706	5.68901
Cyp2f2	-2.15077	5.20638	-9.64934	0.000201977	0.00145324	1.15424
Dguok	-2.14817	8.97776	-16.189	1.63e-05	0.000563494	3.9555
Fam78a	-2.14663	6.6256	-15.8681	1.8e-05	0.000570755	3.84969
D630004N19Rik	-2.14652	4.33738	-16.3954	1.53e-05	0.000563494	4.02229
Zfp442	-2.14544	4.71571	-5.33638	0.0030914	0.00907385	-1.99099
Naalad2	-2.14421	5.22454	-7.97596	0.000498166	0.00248826	0.118185
Anapc10	-2.14391	5.36862	-13.6685	3.74e-05	0.000700292	3.05158
Pde7a	-2.1428	6.81525	-16.0148	1.72e-05	0.000567583	3.89836
Tpgs2	-2.14229	7.38293	-18.2733	8.97e-06	0.000543745	4.58741
Ces1c	-2.14207	4.00775	-5.1014	0.00375768	0.010503	-2.21621
Akr1e1	-2.1408	7.0393	-16.3663	1.54e-05	0.000563494	4.01292
H2afy2	-2.14071	6.22376	-16.2457	1.6e-05	0.000563494	3.97394
Spta1	-2.13931	4.86234	-8.57106	0.000354952	0.00201181	0.508232
Papln	-2.13681	6.2522	-14.6739	2.64e-05	0.000614376	3.43308
Kcne1	-2.13647	5.4226	-11.8836	7.4e-05	0.000906901	2.29222
Htra3	-2.13489	7.73136	-21.7382	3.8e-06	0.000517706	5.46272
Gpt2	-2.13444	7.28659	-18.9176	7.55e-06	0.000538869	4.76529
Lims1	-2.13363	9.5537	-20.1701	5.5e-06	0.000517706	5.09037
C1qtnf7	-2.13362	5.47174	-10.153	0.000158249	0.00129201	1.43238
Hs3st5	-2.13022	4.28691	-20.3705	5.24e-06	0.000517706	5.14
Dct	-2.13004	5.01424	-12.6358	5.49e-05	0.000815128	2.62618
Nov	-2.12906	5.87287	-3.48257	0.0175886	0.0348588	-3.98114
Ddit4l	-2.12672	4.21736	-15.5922	1.96e-05	0.00057831	3.75669
Txndc16	-2.12667	6.31028	-21.197	4.3e-06	0.000517706	5.33828
Cubn	-2.1262	4.49231	-11.71	7.94e-05	0.000930215	2.21198
Ppargc1a	-2.12307	9.12488	-16.8056	1.36e-05	0.000557592	4.1521
Abcc9	-2.12275	10.452	-21.0124	4.49e-06	0.000517706	5.29488
Brms1l	-2.12126	6.15609	-11.0151	0.000106849	0.00106047	1.87793
Pcdhb19	-2.11942	4.69169	-17.7775	1.03e-05	0.000557592	4.44525
Serpina3k	-2.11919	4.95292	-8.0162	0.000486544	0.00245438	0.145384
Kcnb1	-2.11856	7.47334	-22.5755	3.15e-06	0.000517706	5.64742
Dhrs7c	-2.11764	8.35499	-21.6252	3.9e-06	0.000517706	5.43709
Rgs6	-2.11557	6.13366	-22.3296	3.32e-06	0.000517706	5.59414
Apoc3	-2.11181	5.28448	-9.98717	0.000171274	0.00134685	1.34232
Gm166	-2.10791	5.45004	-14.7052	2.61e-05	0.000611606	3.44449
Plxdc2	-2.10761	7.93268	-15.8483	1.81e-05	0.000570755	3.84307
Mybphl	-2.10703	5.13709	-3.515	0.0169886	0.0339141	-3.94194
Fam175a	-2.10454	7.25244	-22.5295	3.18e-06	0.000517706	5.6375
Pde5a	-2.10182	5.19185	-12.596	5.57e-05	0.000820172	2.60909
Zbtb26	-2.10115	5.82666	-11.779	7.72e-05	0.000927225	2.24403
Arhgap18	-2.10115	7.18899	-9.47806	0.000220033	0.00152376	1.0564
Aig1	-2.10064	7.49758	-15.5999	1.96e-05	0.00057831	3.75931
Dvl3	-2.10036	9.51309	-16.9789	1.29e-05	0.000557592	4.20582
Gm826	-2.09897	6.59898	-20.3079	5.32e-06	0.000517706	5.12456
Srek1ip1	-2.09619	7.41015	-18.5615	8.3e-06	0.000538869	4.66792
Tfb1m	-2.09606	7.16543	-7.4645	0.000678879	0.00305286	-0.238785
Smim19	-2.09346	8.61578	-21.6533	3.87e-06	0.000517706	5.44349
Plxdc1	-2.09333	5.84038	-9.93569	0.000175574	0.00135616	1.31406
Gm10400	-2.08999	4.3871	-12.1411	6.67e-05	0.000866261	2.409
Mblac2	-2.08982	6.20799	-12.2079	6.49e-05	0.000853782	2.43888
Fam63b	-2.08849	8.22612	-19.3501	6.76e-06	0.000527187	4.88052
Pbx1	-2.08477	7.96718	-21.4413	4.06e-06	0.000517706	5.39497
Zfp763	-2.08438	4.54036	-20.1298	5.56e-06	0.000517706	5.08031
Thrb	-2.08231	6.21263	-17.5062	1.11e-05	0.000557592	4.36537
Glt28d2	-2.07642	5.83389	-22.1612	3.45e-06	0.000517706	5.55719
ND6	-2.07635	5.8635	-13.8447	3.51e-05	0.000683116	3.12063
Slc35f1	-2.07391	4.26244	-18.4841	8.47e-06	0.000538869	4.64646
Gbp10	-2.07171	7.21049	-9.2555	0.000246451	0.00162579	0.92669
Sorcs2	-2.06938	6.72679	-11.5325	8.56e-05	0.000958886	2.12865
Aamdc	-2.06765	7.2236	-15.0113	2.36e-05	0.000592291	3.55461
1110001J03Rik	-2.06763	8.58252	-15.1937	2.23e-05	0.000586199	3.61902
Zfyve21	-2.06754	7.55591	-22.0518	3.54e-06	0.000517706	5.53299
Tmem260	-2.06468	6.77622	-14.334	2.96e-05	0.000634123	3.30746
Gucy1a3	-2.0642	6.61166	-17.7223	1.04e-05	0.000557592	4.42912
Fam69b	-2.06283	7.28623	-21.3405	4.16e-06	0.000517706	5.37167
Nfix	-2.06229	10.6026	-20.967	4.54e-06	0.000517706	5.28412
Meox2	-2.06157	7.32079	-13.5303	3.93e-05	0.000713302	2.9967
Slc4a4	-2.06067	7.78216	-16.504	1.48e-05	0.000563494	4.05703
Tnni3k	-2.0603	9.70344	-16.3405	1.56e-05	0.000563494	4.00462
Mug-ps1	-2.0601	4.00164	-7.54872	0.00064435	0.00295067	-0.178536
9030025P20Rik	-2.05797	4.99079	-7.29927	0.000753212	0.00328328	-0.358755
Slc25a42	-2.05692	8.27272	-14.4785	2.82e-05	0.000626721	3.36128
Mtif2	-2.05434	7.29717	-10.4439	0.000138147	0.001202	1.58682
Lsmem2	-2.05298	7.46166	-13.2306	4.38e-05	0.000742415	2.87559
Tmem35	-2.04671	6.04866	-20.9588	4.55e-06	0.000517706	5.28218
Zfp882	-2.04661	4.95132	-19.8402	5.97e-06	0.000517706	5.00726
Bsg	-2.04617	11.5992	-20.651	4.9e-06	0.000517706	5.20845
Ccdc66	-2.04582	6.41307	-21.9133	3.65e-06	0.000517706	5.50212
Prrg1	-2.04508	6.11532	-12.9085	4.94e-05	0.000780843	2.74209
Efemp1	-2.04413	6.72058	-9.59677	0.000207325	0.00147626	1.12439
Gpam	-2.04362	9.42454	-18.6071	8.2e-06	0.000538869	4.68053
Entpd4	-2.04332	10.3206	-7.84302	0.000538985	0.00262305	0.0274192
Map3k7cl	-2.0421	6.00104	-14.4906	2.81e-05	0.000626032	3.36575
Mrpl57	-2.0407	7.73928	-19.7893	6.05e-06	0.000517706	4.99428
Rai2	-2.03916	5.59296	-18.5844	8.25e-06	0.000538869	4.67424
Angptl1	-2.03886	4.01062	-15.1687	2.24e-05	0.000586199	3.61022
Mterfd3	-2.03876	4.58278	-15.9522	1.75e-05	0.000567615	3.87766
Slc38a3	-2.03781	9.04064	-19.1918	7.04e-06	0.000538869	4.83871
Lrrc14b	-2.03671	8.50253	-12.659	5.44e-05	0.000812355	2.63615
Olfr558	-2.03479	6.50223	-20.0933	5.61e-06	0.000517706	5.07118
Cxx1c	-2.03205	6.49877	-18.2468	9.03e-06	0.000544066	4.57994
Rab9	-2.03193	7.67431	-21.7214	3.81e-06	0.000517706	5.45892
Gpr157	-2.02982	7.62569	-17.6933	1.05e-05	0.000557592	4.42062
Epha7	-2.02936	6.08006	-10.3955	0.00014127	0.0012116	1.56143
Letm2	-2.02893	5.88185	-19.5832	6.37e-06	0.000517706	4.94132
Apip	-2.02878	7.56181	-19.9398	5.82e-06	0.000517706	5.03254
Cux2	-2.028	5.93508	-18.7354	7.93e-06	0.000538869	4.71576
Amy1	-2.02793	4.67753	-8.39668	0.000391149	0.00213987	0.396599
Senp8	-2.02725	4.9311	-14.1746	3.13e-05	0.000649996	3.24739
Zfp354b	-2.02578	3.98882	-20.7699	4.76e-06	0.000517706	5.23709
Cyp2j9	-2.02423	4.65693	-15.4388	2.06e-05	0.00058168	3.70417
Mamdc2	-2.02401	4.99556	-9.38702	0.000230411	0.00156286	1.0037
Atp1b2	-2.02343	7.24302	-17.4923	1.11e-05	0.000557592	4.36125
Fat4	-2.02319	6.97828	-12.3498	6.13e-05	0.000842427	2.50177
Gria3	-2.02316	4.971	-17.5536	1.09e-05	0.000557592	4.37945
Fam195a	-2.02166	8.53066	-14.1648	3.14e-05	0.000649996	3.24367
Tbc1d31	-2.02092	5.84163	-11.2919	9.48e-05	0.000996326	2.01353
Pstpip2	-2.02012	7.69819	-12.691	5.37e-05	0.000807896	2.64988
Gm5874	-2.01902	6.42712	-8.83999	0.000306624	0.00185022	0.676303
Phkb	-2.01814	8.50472	-20.1696	5.5e-06	0.000517706	5.09023
Hfe2	-2.01778	11.0244	-20.9124	4.6e-06	0.000517706	5.27116
Ppara	-2.01701	8.48568	-18.6896	8.02e-06	0.000538869	4.7032
C4a	-2.01666	4.24989	-19.3667	6.73e-06	0.000527187	4.88488
Casq1	-2.01623	6.71398	-8.07109	0.000471202	0.00240374	0.182292
Zfp770	-2.01526	9.09667	-14.9248	2.43e-05	0.00059396	3.52375
Mrpl3	-2.01524	9.3982	-19.4753	6.54e-06	0.000522547	4.91329
Sgcb	-2.0137	9.72581	-20.9108	4.6e-06	0.000517706	5.27076
Hykk	-2.01364	5.24547	-17.5484	1.09e-05	0.000557592	4.3779
Foxn3	-2.01319	7.97625	-17.1719	1.22e-05	0.000557592	4.26492
Plac9b	-2.01281	7.24046	-14.9362	2.42e-05	0.000593582	3.52781
Tspan18	-2.01266	7.41321	-17.6482	1.06e-05	0.000557592	4.40735
C7	-2.01234	7.64429	-16.1642	1.64e-05	0.000563494	3.94741
Zfp961	-2.01191	5.70703	-20.4277	5.17e-06	0.000517706	5.15405
Cpq	-2.01137	8.77447	-14.9745	2.39e-05	0.000593582	3.54149
Gm22043	-2.00935	3.96286	-16.4324	1.51e-05	0.000563494	4.03413
Qsox2	-2.00822	6.87446	-13.9039	3.44e-05	0.000672807	3.14362
Zfp931	-2.00679	7.4958	-15.4882	2.03e-05	0.000581231	3.72115
Myl1	-2.00613	6.71224	-13.1362	4.54e-05	0.000755329	2.83685
Tmem218	-2.006	6.63588	-15.451	2.05e-05	0.000581652	3.70838
Elp4	-2.0049	7.32105	-19.7239	6.15e-06	0.000517706	4.97754
Zfp449	-2.00429	6.02644	-20.0681	5.64e-06	0.000517706	5.06486
Atpaf1	-2.00358	9.38069	-19.5247	6.46e-06	0.000519465	4.92615
Rab3a	-2.00355	6.52113	-14.3352	2.96e-05	0.000634123	3.3079
Sync	-2.0033	9.32569	-13.8347	3.52e-05	0.000683701	3.11673
Rps6ka2	-2.00089	7.99096	-15.6751	1.91e-05	0.000575745	3.78485
Smarca2	-1.99924	8.68709	-18.0249	9.59e-06	0.000557592	4.51677
Rragd	-1.99809	8.51257	-15.188	2.23e-05	0.000586199	3.61701
Rps6ka5	-1.9979	5.50637	-13.9969	3.33e-05	0.000663338	3.17952
Tmem141	-1.9977	9.11878	-18.5296	8.37e-06	0.000538869	4.65908
9030617O03Rik	-1.9972	7.75561	-20.4261	5.17e-06	0.000517706	5.15367
Clasp1	-1.99572	10.5217	-16.0132	1.72e-05	0.000567583	3.89784
Slc41a3	-1.99553	9.44015	-13.966	3.37e-05	0.000665279	3.16761
Klhl38	-1.99518	8.75378	-10.2938	0.000148115	0.00124486	1.50766
Pgm5	-1.99441	9.92897	-21.0644	4.44e-06	0.000517706	5.30714
Angptl7	-1.9943	5.75698	-8.87405	0.000301078	0.00183202	0.697245
Slc6a8	-1.99409	10.5223	-16.4408	1.51e-05	0.000563494	4.03684
Aldh1a1	-1.99403	7.23689	-15.8234	1.82e-05	0.000570822	3.83474
Zfp791	-1.99237	4.61667	-19.3484	6.76e-06	0.000527187	4.88008
Sdr42e1	-1.99057	4.89091	-15.6885	1.9e-05	0.000575525	3.78938
Aoc3	-1.99038	6.65736	-17.4969	1.11e-05	0.000557592	4.36262
Scd1	-1.99021	8.58194	-8.28194	0.000417367	0.00223084	0.321964
Inpp5e	-1.98915	7.18669	-20.5416	5.03e-06	0.000517706	5.18189
Esrrg	-1.98595	7.64706	-17.5384	1.1e-05	0.000557592	4.37495
Adra1a	-1.98509	7.21209	-7.45768	0.00068177	0.00306136	-0.243691
Mmab	-1.98419	7.19732	-12.4396	5.92e-05	0.000837019	2.54118
3632451O06Rik	-1.9838	5.72541	-16.9622	1.29e-05	0.000557592	4.20068
Cyb5d2	-1.98378	7.84798	-10.9701	0.00010898	0.00106545	1.8556
Asb2	-1.98206	9.97786	-20.2595	5.38e-06	0.000517706	5.1126
Atp5g1	-1.97993	10.0291	-20.15	5.53e-06	0.000517706	5.08536
3222401L13Rik	-1.97779	6.18973	-13.9837	3.34e-05	0.000663401	3.17442
Enpp5	-1.97596	7.36327	-21.1028	4.4e-06	0.000517706	5.31618
Pkdrej	-1.97562	5.4708	-15.0195	2.36e-05	0.000591947	3.55751
Ppargc1b	-1.97433	7.74899	-14.0242	3.3e-05	0.000662548	3.19001
Neo1	-1.97346	9.04331	-19.6988	6.18e-06	0.000517706	4.97109
Phxr4	-1.97246	4.58623	-14.6755	2.64e-05	0.000614376	3.43368
Il10rb	-1.97211	10.0877	-17.9513	9.79e-06	0.000557592	4.49561
Fam124b	-1.97166	4.83785	-18.911	7.57e-06	0.000538869	4.76349
Slc36a2	-1.97139	6.60682	-18.7299	7.94e-06	0.000538869	4.71426
Gstt1	-1.97093	6.59405	-19.9541	5.8e-06	0.000517706	5.03616
Hccs	-1.96608	9.61899	-18.2289	9.07e-06	0.000544066	4.57487
Ogfod1	-1.96593	8.23862	-20.2695	5.37e-06	0.000517706	5.11505
Cmc2	-1.96558	8.92459	-16.5804	1.45e-05	0.000563494	4.08129
Man1c1	-1.96178	8.89404	-16.8582	1.33e-05	0.000557592	4.16849
Ddo	-1.96164	7.64069	-17.5167	1.1e-05	0.000557592	4.36851
Atg10	-1.95972	8.38665	-20.7955	4.73e-06	0.000517706	5.24323
4930452B06Rik	-1.95958	4.07421	-19.9394	5.82e-06	0.000517706	5.03244
Lzic	-1.95932	6.80928	-15.1548	2.25e-05	0.000586199	3.60535
Fundc1	-1.95925	8.63635	-20.6959	4.84e-06	0.000517706	5.2193
Tppp	-1.95857	6.01065	-18.0873	9.43e-06	0.000555228	4.53464
Mtg1	-1.95694	7.16991	-9.40519	0.000228295	0.00155563	1.01426
Drd2	-1.95611	5.32491	-8.89117	0.000298336	0.00182294	0.707739
Slc38a11	-1.95404	4.29609	-12.1084	6.75e-05	0.000872443	2.39431
Zfp72	-1.95282	5.67008	-14.29	3.01e-05	0.000637739	3.29093
Fdft1	-1.95222	8.54947	-20.2423	5.4e-06	0.000517706	5.10833
Prkdc	-1.95097	5.48505	-13.1677	4.49e-05	0.000750438	2.8498
Serpina1d	-1.94876	3.33245	-8.8884	0.000298778	0.00182334	0.706041
Acn9	-1.94755	7.15996	-16.5055	1.48e-05	0.000563494	4.05748
Gpm6a	-1.947	5.32011	-10.2757	0.000149376	0.00125154	1.49802
Tmem230	-1.94642	7.01344	-20.4847	5.1e-06	0.000517706	5.16802
Arsb	-1.94632	6.54096	-10.7125	0.000122234	0.00112933	1.72566
Cps1	-1.94505	4.27757	-8.68471	0.000333498	0.00194262	0.579853
Ak3	-1.94482	8.97701	-13.3943	4.13e-05	0.000723688	2.94211
Itpkb	-1.94445	8.88352	-19.1578	7.1e-06	0.000538869	4.82968
Plekha6	-1.94436	7.74441	-11.0434	0.00010553	0.00105342	1.89197
Dhdh	-1.94204	8.79597	-15.0975	2.3e-05	0.000586199	3.58516
Asb13	-1.94113	7.76887	-20.1851	5.48e-06	0.000517706	5.09411
Etv1	-1.93937	6.68663	-11.8891	7.38e-05	0.000906538	2.29472
AA415398	-1.93936	5.15412	-10.2328	0.000152412	0.00126782	1.47515
Ltbp4	-1.93891	9.52926	-15.3929	2.09e-05	0.000582741	3.68833
Cenpf	-1.9382	5.07323	-12.3577	6.12e-05	0.000841343	2.50523
Zfp39	-1.93813	5.98064	-18.9936	7.41e-06	0.000538869	4.78577
Rfc4	-1.93546	7.05017	-20.5481	5.02e-06	0.000517706	5.18347
Gid4	-1.93427	9.37632	-18.8053	7.78e-06	0.000538869	4.73484
1700021F05Rik	-1.93424	9.34308	-19.1554	7.1e-06	0.000538869	4.82906
Mrpl34	-1.93282	9.12069	-18.5824	8.25e-06	0.000538869	4.67371
Tmem255b	-1.93278	6.32658	-5.90386	0.00197924	0.00651231	-1.47573
Pkhd1l1	-1.93092	4.64244	-12.2069	6.49e-05	0.000853782	2.43842
Tlcd1	-1.93064	6.44136	-13.4709	4.02e-05	0.00071761	2.97293
Selenbp1	-1.93043	6.87209	-20.4152	5.18e-06	0.000517706	5.15098
Tbc1d4	-1.92866	8.14069	-9.6388	0.000203036	0.00145826	1.14826
Serpinc1	-1.92849	4.6964	-8.68822	0.00033286	0.00193955	0.582054
Lynx1	-1.92683	9.25269	-11.8161	7.6e-05	0.000923277	2.26115
Gnb3	-1.92398	6.69977	-8.78986	0.000315008	0.00187431	0.645343
Hltf	-1.92325	5.54296	-19.8086	6.02e-06	0.000517706	4.99922
Ccdc3	-1.92324	5.53685	-13.4496	4.05e-05	0.000718346	2.9644
Fbxl17	-1.92264	8.81158	-20.4711	5.11e-06	0.000517706	5.16469
CN725425	-1.92225	3.78357	-13.5565	3.89e-05	0.000712559	3.00715
Clasp2	-1.92008	8.06366	-18	9.66e-06	0.000557592	4.50964
Pex11a	-1.91946	8.2812	-19.3439	6.77e-06	0.000527187	4.8789
Tmem50b	-1.9181	10.3014	-15.4927	2.02e-05	0.000581231	3.72269
Zfp827	-1.91765	7.38474	-16.9318	1.31e-05	0.000557592	4.19131
Ttc30b	-1.91655	4.92766	-19.4437	6.6e-06	0.000525029	4.90505
Foxo3	-1.91387	8.43726	-15.7464	1.87e-05	0.000575525	3.8089
Plce1	-1.91241	7.8778	-17.3471	1.16e-05	0.000557592	4.31786
Flt3l	-1.91148	5.62893	-20.1196	5.57e-06	0.000517706	5.07775
Alad	-1.91135	9.3761	-17.197	1.21e-05	0.000557592	4.27254
Klhl24	-1.90915	10.7065	-15.8974	1.78e-05	0.000570755	3.85944
3110057O12Rik	-1.90908	8.16733	-10.8355	0.000115681	0.00109628	1.78808
Man2a2	-1.90866	8.62638	-17.1894	1.21e-05	0.000557592	4.27023
Cd59b	-1.9076	4.65174	-12.409	5.99e-05	0.000838283	2.52776
Tbc1d19	-1.90738	7.38357	-20.1037	5.59e-06	0.000517706	5.07377
Myo6	-1.90534	5.83044	-16.5642	1.46e-05	0.000563494	4.07618
Stard8	-1.90431	7.76282	-20.0578	5.66e-06	0.000517706	5.06228
Orm1	-1.90397	4.17729	-5.3664	0.00301667	0.0089061	-1.96274
Eogt	-1.90287	7.5281	-17.5941	1.08e-05	0.000557592	4.3914
A730020M07Rik	-1.90211	5.16652	-11.9898	7.08e-05	0.000890322	2.34071
Cog5	-1.90119	7.57715	-16.912	1.31e-05	0.000557592	4.18517
Sord	-1.90083	10.8436	-18.7822	7.83e-06	0.000538869	4.72853
Cyp4a12a	-1.90024	3.72534	-8.37262	0.000396481	0.00215938	0.381026
Lin7a	-1.89885	5.14121	-16.1875	1.63e-05	0.000563494	3.95502
Ephx1	-1.89772	7.10338	-16.862	1.33e-05	0.000557592	4.16966
Kcna1	-1.89767	5.7379	-14.1312	3.18e-05	0.000652557	3.23091
Mmachc	-1.89766	10.1996	-17.9002	9.93e-06	0.000557592	4.48087
Ssbp2	-1.89696	9.20138	-18.867	7.66e-06	0.000538869	4.75159
Vps13a	-1.89671	7.31839	-17.7429	1.04e-05	0.000557592	4.43514
Dgkb	-1.89644	4.3797	-12.2489	6.38e-05	0.000850301	2.45712
Eml1	-1.89582	8.27649	-20.2088	5.45e-06	0.000517706	5.10001
Ugt2b1	-1.89503	3.27587	-5.78448	0.00216773	0.00695563	-1.5809
Nrxn1	-1.89447	4.63332	-18.9431	7.5e-06	0.000538869	4.77218
Acot2	-1.89395	11.4493	-20.1403	5.54e-06	0.000517706	5.08293
Nme5	-1.89191	4.63501	-12.3918	6.03e-05	0.000838283	2.52024
Gdpd1	-1.89067	7.49581	-15.6732	1.91e-05	0.000575745	3.7842
Siae	-1.89003	6.49959	-19.6136	6.32e-06	0.000517706	4.94916
Oxsm	-1.88979	8.20443	-17.9079	9.91e-06	0.000557592	4.4831
9530091C08Rik	-1.88964	4.58963	-18.6561	8.09e-06	0.000538869	4.69402
Gramd1b	-1.88939	8.01529	-18.4995	8.44e-06	0.000538869	4.65075
Suox	-1.88633	7.61558	-15.3164	2.14e-05	0.000582741	3.66183
Lrrc61	-1.88616	7.03504	-16.4676	1.5e-05	0.000563494	4.0454
Tac1	-1.88565	4.29557	-13.5777	3.86e-05	0.000709237	3.01559
Sgol2	-1.88564	6.37139	-12.0364	6.95e-05	0.000883473	2.36184
Pcmtd1	-1.88483	8.40777	-19.8658	5.93e-06	0.000517706	5.01377
Nova1	-1.88468	4.21167	-14.7744	2.55e-05	0.000607636	3.4696
Arid2	-1.88405	7.72028	-16.5726	1.45e-05	0.000563494	4.07881
Lamtor4	-1.88397	9.4386	-18.5965	8.22e-06	0.000538869	4.67759
Hpgd	-1.8837	6.67627	-18.6937	8.01e-06	0.000538869	4.70433
Fads1	-1.88254	8.37702	-16.3525	1.55e-05	0.000563494	4.00847
Abcb7	-1.88152	8.60737	-19.7907	6.04e-06	0.000517706	4.99463
Mir490	-1.8814	4.34788	-12.1635	6.61e-05	0.000861647	2.41907
Nsun3	-1.88111	7.69717	-16.9965	1.28e-05	0.000557592	4.21125
Phtf2	-1.87982	8.92395	-18.3322	8.82e-06	0.000540695	4.60399
Cideb	-1.87934	6.71462	-15.5694	1.97e-05	0.000578471	3.74893
Tmem171	-1.87895	7.14187	-20.1443	5.54e-06	0.000517706	5.08392
Rdh7	-1.87786	4.20888	-6.32436	0.00145277	0.0051863	-1.1181
Itgbl1	-1.87747	6.16992	-14.3793	2.92e-05	0.000632698	3.32439
Mettl18	-1.87627	4.95096	-15.3316	2.13e-05	0.000582741	3.66713
Stmn2	-1.87615	6.28763	-11.2635	9.59e-05	0.00100042	1.99981
Echdc1	-1.87495	6.8294	-17.1132	1.24e-05	0.000557592	4.24702
Lrp2bp	-1.8733	4.30353	-11.8108	7.62e-05	0.000923387	2.25874
Slc18b1	-1.87092	6.38062	-15.7733	1.85e-05	0.000573976	3.81796
Lpin1	-1.87077	9.37256	-17.6354	1.07e-05	0.000557592	4.4036
Mettl7a3	-1.86945	6.11375	-14.8906	2.46e-05	0.000596557	3.51149
Wnk2	-1.86776	7.90563	-19.5813	6.37e-06	0.000517706	4.94081
Steap3	-1.86649	8.08224	-19.8339	5.98e-06	0.000517706	5.00565
Cmah	-1.86526	5.31373	-19.702	6.18e-06	0.000517706	4.97194
Ppfibp2	-1.86468	6.67571	-16.2662	1.59e-05	0.000563494	3.98061
Jam2	-1.86459	10.5254	-16.2155	1.62e-05	0.000563494	3.96413
Scgb1c1	-1.86301	8.41041	-18.6036	8.21e-06	0.000538869	4.67956
Them6	-1.86277	6.05265	-12.1898	6.54e-05	0.000857379	2.43079
Mreg	-1.86222	7.35863	-14.8046	2.53e-05	0.000603993	3.48051
Slc48a1	-1.86198	9.62782	-19.026	7.34e-06	0.000538869	4.79449
Zbtb14	-1.86069	6.75721	-14.6308	2.68e-05	0.000616876	3.41733
Uts2r	-1.85788	4.90607	-12.479	5.83e-05	0.000834589	2.55835
Cluh	-1.85781	9.6909	-18.3664	8.74e-06	0.000540695	4.61361
Ppm1k	-1.85725	8.64885	-15.6597	1.92e-05	0.000576087	3.77962
3425401B19Rik	-1.85698	8.07499	-17.4129	1.14e-05	0.000557592	4.33758
Setbp1	-1.85653	7.07834	-11.0512	0.000105169	0.00105201	1.89584
Ttll1	-1.85602	7.96451	-16.31	1.57e-05	0.000563494	3.99475
Ptprs	-1.85437	7.58857	-15.3896	2.09e-05	0.000582741	3.68722
Aqp4	-1.85417	4.71572	-11.1407	0.000101146	0.00103006	1.93992
Mrvi1	-1.85411	5.33244	-14.1784	3.13e-05	0.000649722	3.24881
Arhgap42	-1.85408	6.66934	-16.2139	1.62e-05	0.000563494	3.9636
Scn4b	-1.85392	6.62257	-7.83425	0.000541814	0.00262995	0.0213824
Gtpbp8	-1.85018	6.13669	-15.0634	2.32e-05	0.000588406	3.57309
Atp5sl	-1.84994	7.40629	-19.0241	7.35e-06	0.000538869	4.79396
Slc22a3	-1.8487	5.57232	-14.1285	3.18e-05	0.000652632	3.22985
Fbxo3	-1.84704	8.9986	-19.8215	6e-06	0.000517706	5.0025
Klf12	-1.8455	7.0347	-12.7913	5.17e-05	0.000795271	2.6926
Abhd3	-1.84471	5.87681	-11.444	8.88e-05	0.000973604	2.08658
Matn2	-1.84459	6.03067	-18.2869	8.93e-06	0.000543111	4.59125
Tppp3	-1.84373	7.8491	-15.586	1.96e-05	0.00057831	3.7546
1810041L15Rik	-1.84216	4.38515	-9.42816	0.000225651	0.00154676	1.02758
Wif1	-1.84215	5.02075	-7.57388	0.000634438	0.00292242	-0.160646
Tmem63b	-1.84201	9.6948	-17.2327	1.2e-05	0.000557592	4.28336
Mlh3	-1.83944	6.88197	-16.716	1.39e-05	0.000563494	4.12406
Acad12	-1.83943	6.81059	-12.41	5.99e-05	0.000838283	2.52821
Lyrm7	-1.83896	6.27186	-18.5257	8.38e-06	0.000538869	4.65801
Acad11	-1.83785	9.28406	-18.2251	9.08e-06	0.000544066	4.5738
Nipal3	-1.8377	6.58338	-18.3535	8.77e-06	0.000540695	4.60999
Npr2	-1.83725	8.25049	-19.5645	6.4e-06	0.000517706	4.93646
Apob	-1.83585	4.56091	-5.12572	0.0036814	0.010346	-2.19256
Olfr1034	-1.83527	5.09574	-10.5743	0.000130129	0.0011688	1.65469
Scmh1	-1.83508	8.0669	-15.7761	1.85e-05	0.000573976	3.81889
Crhr2	-1.83473	7.56478	-11.593	8.34e-05	0.000947288	2.15721
Taco1	-1.83388	7.94276	-17.154	1.22e-05	0.000557592	4.25947
Zfp874b	-1.83363	4.60239	-7.69664	0.000588604	0.00278521	-0.0741342
Ift20	-1.83361	9.25413	-17.6637	1.06e-05	0.000557592	4.41193
Ahsg	-1.83326	6.13719	-4.82186	0.0047811	0.0125619	-2.49376
Fastk	-1.8326	10.9882	-19.6547	6.25e-06	0.000517706	4.95977
Tril	-1.83199	5.38335	-17.0736	1.25e-05	0.000557592	4.23491
Ralgapa1	-1.83066	8.23849	-17.8905	9.95e-06	0.000557592	4.47806
Cmbl	-1.83047	8.40279	-7.61727	0.000617771	0.00286871	-0.129929
Homer2	-1.83013	7.78758	-12.4955	5.79e-05	0.000834573	2.56555
Tubb4a	-1.82958	5.15236	-12.8142	5.13e-05	0.000793184	2.7023
Dcun1d2	-1.82914	8.17015	-16.1824	1.63e-05	0.000563494	3.95333
Pigo	-1.82811	5.94433	-13.5216	3.94e-05	0.000713302	2.99321
9130011E15Rik	-1.8279	6.945	-16.6012	1.44e-05	0.000563494	4.08788
Cdkal1	-1.82674	7.78315	-19.5353	6.44e-06	0.000519465	4.92889
mt-Ts1	-1.82587	5.95109	-5.82939	0.00209443	0.00676713	-1.54114
Zfp30	-1.82571	6.17717	-12.6607	5.44e-05	0.000812332	2.63687
Ttc21b	-1.82546	5.56638	-15.1472	2.26e-05	0.000586199	3.60268
Whrn	-1.82545	6.01883	-12.1765	6.57e-05	0.000858789	2.42486
Rap1gap2	-1.82524	8.02738	-18.322	8.85e-06	0.000540695	4.60115
Auh	-1.82394	8.85587	-17.3388	1.16e-05	0.000557592	4.31536
Tnfsf10	-1.82301	6.56588	-8.50125	0.000368944	0.00205937	0.463796
Arhgef9	-1.82145	6.66863	-17.3456	1.16e-05	0.000557592	4.3174
D930027P08Rik	-1.82119	4.85981	-16.8161	1.35e-05	0.000557592	4.15538
Trmt1l	-1.82076	7.05341	-6.79827	0.00104535	0.0041216	-0.737502
Trp53inp2	-1.82042	11.5303	-17.8478	1.01e-05	0.000557592	4.46568
H2afv	-1.81889	9.1058	-16.9905	1.28e-05	0.000557592	4.2094
Zdhhc1	-1.81879	7.28204	-11.7326	7.87e-05	0.000929469	2.22252
Gm13212	-1.81872	7.45837	-12.7749	5.2e-05	0.000796708	2.68565
Cyp2c29	-1.81868	3.82912	-8.70018	0.000330698	0.00193422	0.589539
Tuba8	-1.81805	10.3574	-12.2474	6.39e-05	0.000850301	2.45644
Cd59a	-1.81737	10.6971	-14.0165	3.31e-05	0.000662548	3.18704
Fgf13	-1.81712	7.88692	-12.4505	5.9e-05	0.000835628	2.54591
Myct1	-1.81438	6.69447	-11.0221	0.00010652	0.00105938	1.88142
Igsf10	-1.81411	4.59807	-17.1818	1.22e-05	0.000557592	4.26791
Antxr2	-1.8138	9.90194	-19.0822	7.24e-06	0.000538869	4.80952
Nicn1	-1.81378	7.80082	-17.3881	1.15e-05	0.000557592	4.33017
Myh7b	-1.81353	6.18573	-19.1228	7.16e-06	0.000538869	4.82036
Slc16a10	-1.81231	6.82309	-17.4482	1.13e-05	0.000557592	4.34812
Dgat2	-1.81185	10.7045	-16.8992	1.32e-05	0.000557592	4.18121
Ptpla	-1.81144	8.20684	-13.9789	3.35e-05	0.000663895	3.1726
Uprt	-1.81111	8.4199	-14.0346	3.29e-05	0.000661386	3.194
Dyrk1b	-1.81085	8.17205	-12.0498	6.91e-05	0.000881936	2.36792
Trpc3	-1.81034	5.3875	-16.242	1.6e-05	0.000563494	3.97273
Strip2	-1.80977	9.22125	-16.984	1.29e-05	0.000557592	4.20742
C1s1	-1.80966	6.13042	-10.2548	0.000150841	0.00125945	1.48693
Ghr	-1.80836	10.2601	-17.9741	9.73e-06	0.000557592	4.50219
Osbpl6	-1.80809	6.38493	-13.1737	4.48e-05	0.000750322	2.85227
Atp8a1	-1.807	8.05354	-16.6092	1.44e-05	0.000563494	4.0904
Pcyox1	-1.8066	8.59436	-13.3858	4.14e-05	0.000723688	2.93869
Rbl2	-1.80645	7.40502	-8.00164	0.00049071	0.00246457	0.13556
Plekhb2	-1.80352	9.35225	-18.1594	9.25e-06	0.000551124	4.55519
Cytl1	-1.80348	7.82029	-8.30621	0.000411652	0.00221101	0.337828
Gfra1	-1.80323	6.53114	-10.7825	0.000118448	0.00111177	1.76131
9630013D21Rik	-1.80071	4.23395	-13.9423	3.39e-05	0.000668105	3.15847
Ptprm	-1.80054	9.07612	-18.2623	8.99e-06	0.000543994	4.58433
Stard10	-1.80049	8.47582	-10.4574	0.000137291	0.00119929	1.59389
Hopx	-1.80016	8.43133	-18.4976	8.44e-06	0.000538869	4.6502
Gm13375	-1.80001	8.73025	-15.95	1.75e-05	0.000567615	3.87691
Dpysl2	-1.79996	9.50726	-9.27399	0.000244118	0.00161347	0.937579
Myl9	-1.79939	7.51672	-7.94753	0.000506578	0.00251079	0.0988905
Bckdhb	-1.79906	8.78477	-18.6198	8.17e-06	0.000538869	4.68403
Mef2d	-1.79733	8.65025	-12.2843	6.3e-05	0.000846586	2.47284
Kcnj11	-1.7972	8.24357	-16.284	1.58e-05	0.000563494	3.98637
Cpeb3	-1.79696	7.06384	-13.8211	3.54e-05	0.000683839	3.11144
G6pc3	-1.7964	9.1764	-17.3989	1.14e-05	0.000557592	4.33338
Ubl5	-1.79581	9.65026	-17.198	1.21e-05	0.000557592	4.27285
Ccbl1	-1.79509	7.62018	-18.9278	7.53e-06	0.000538869	4.76804
Kcnq1	-1.79355	7.88851	-16.3384	1.56e-05	0.000563494	4.00392
Lrrcc1	-1.79297	5.39671	-18.4871	8.47e-06	0.000538869	4.64728
Spa17	-1.7925	5.57087	-17.6604	1.06e-05	0.000557592	4.41095
Gm11709	-1.79214	5.68115	-18.6854	8.03e-06	0.000538869	4.70206
Slc31a2	-1.79195	8.9478	-16.0184	1.72e-05	0.000567583	3.89956
Amz2	-1.79144	7.99777	-15.0302	2.35e-05	0.000591114	3.5613
Usp46	-1.79117	8.10249	-16.4081	1.53e-05	0.000563494	4.02635
Arhgef19	-1.79062	6.45803	-15.353	2.11e-05	0.000582741	3.67455
Cecr2	-1.78981	6.62178	-10.3802	0.000142277	0.00121768	1.55337
6230400D17Rik	-1.78958	5.24569	-16.1771	1.64e-05	0.000563494	3.95163
Tmod4	-1.78945	8.13994	-10.1223	0.000160573	0.00130426	1.41579
Fam120c	-1.78877	7.28612	-11.6396	8.18e-05	0.000941073	2.17909
Tgtp2	-1.78866	6.77657	-4.15074	0.00888936	0.0202691	-3.20547
Klhl13	-1.78848	7.47435	-18.6745	8.05e-06	0.000538869	4.69906
Ppp1r16b	-1.78847	6.96593	-14.3557	2.94e-05	0.000634123	3.31556
Mylk3	-1.7884	9.82688	-13.0518	4.69e-05	0.000765559	2.80191
Smyd3	-1.7881	5.7696	-17.2096	1.21e-05	0.000557592	4.27637
Tspan12	-1.7877	7.47841	-15.6106	1.95e-05	0.00057831	3.76294
Maob	-1.7868	9.10254	-18.5343	8.36e-06	0.000538869	4.66039
Folr2	-1.78603	6.93972	-10.524	0.000133153	0.00118018	1.62862
Acss1	-1.78578	11.3351	-13.4617	4.03e-05	0.00071761	2.96926
Serpinb9	-1.78519	5.64538	-8.29604	0.000414035	0.00221892	0.331186
Enpp3	-1.78496	6.34228	-11.0189	0.00010667	0.00106	1.87983
St6galnac6	-1.78434	8.55948	-18.8624	7.66e-06	0.000538869	4.75034
Gpr22	-1.78412	7.45532	-10.6574	0.00012531	0.00114507	1.69749
Htra4	-1.78308	6.82488	-15.0063	2.37e-05	0.000592291	3.55281
Hibch	-1.78292	7.95497	-8.21531	0.00043355	0.00227884	0.278182
Zfp780b	-1.78234	4.65509	-8.21524	0.000433568	0.00227884	0.278133
Atp5s	-1.77968	6.73507	-16.6458	1.42e-05	0.000563494	4.10198
Opa1	-1.77884	9.31303	-18.1083	9.38e-06	0.000555228	4.54064
Samd12	-1.77866	5.67026	-17.4726	1.12e-05	0.000557592	4.35539
Gstm4	-1.7784	7.86032	-16.7628	1.37e-05	0.000560973	4.13875
Polr2b	-1.77637	7.98661	-15.5216	2e-05	0.000580836	3.73259
Upk3b	-1.7757	5.16456	-9.76205	0.000191056	0.00141011	1.21769
Zyg11b	-1.77498	8.57839	-18.4784	8.48e-06	0.000538869	4.64488
Dio2	-1.77478	4.97731	-15.4831	2.03e-05	0.000581231	3.71941
Paqr4	-1.77389	7.71471	-18.3099	8.88e-06	0.000541101	4.59774
Zfp266	-1.77347	7.81626	-15.0524	2.33e-05	0.000589284	3.5692
Cnn1	-1.7733	6.19674	-2.74737	0.0404039	0.0683292	-4.90903
Aspa	-1.77284	3.93292	-11.7339	7.87e-05	0.000929469	2.22312
Fgd4	-1.77218	6.84273	-15.5295	2e-05	0.000580081	3.73529
Hlf	-1.77205	6.61525	-18.0561	9.51e-06	0.000555919	4.52573
Kdr	-1.77171	9.09971	-14.8795	2.47e-05	0.000596557	3.50751
Decr2	-1.77165	7.47233	-17.1811	1.22e-05	0.000557592	4.26772
Abca12	-1.77083	5.39816	-11.5706	8.42e-05	0.000950039	2.14665
Gpc6	-1.76966	7.56971	-18.412	8.64e-06	0.000540695	4.62637
Rnf207	-1.76842	6.89818	-11.6777	8.05e-05	0.000936014	2.1969
Ugt2b36	-1.76806	3.79234	-4.85618	0.00463935	0.0122823	-2.45911
Leprel1	-1.76779	7.25747	-16.1195	1.66e-05	0.000564396	3.93278
Wrb	-1.76744	7.60664	-16.6018	1.44e-05	0.000563494	4.08807
Lpgat1	-1.76673	8.86977	-12.3102	6.23e-05	0.00084575	2.48431
Cyp2u1	-1.76605	7.56782	-17.9072	9.91e-06	0.000557592	4.48289
Dusp18	-1.76501	8.15567	-5.78964	0.00215916	0.00693367	-1.57632
Osgepl1	-1.765	8.51	-11.9599	7.17e-05	0.000894824	2.32711
Slc25a13	-1.7644	8.84709	-16.6753	1.41e-05	0.000563494	4.11128
Agpat2	-1.76363	9.02621	-17.8455	1.01e-05	0.000557592	4.46503
Idnk	-1.76353	6.7783	-16.6639	1.41e-05	0.000563494	4.10768
Gxylt2	-1.76337	5.7308	-7.65814	0.000602545	0.00282444	-0.101138
Olfr1381	-1.76268	3.5444	-17.7696	1.03e-05	0.000557592	4.44292
Mettl4	-1.76129	7.36892	-10.8713	0.000113853	0.00108844	1.80611
Epb4.1l3	-1.75932	5.57383	-15.3239	2.13e-05	0.000582741	3.66444
Pard6g	-1.75851	4.77761	-18.3797	8.71e-06	0.000540695	4.61732
Stk39	-1.75818	9.38621	-14.9376	2.42e-05	0.000593582	3.52833
Tspan13	-1.75757	9.31509	-11.9061	7.33e-05	0.000905755	2.30255
Nkiras2	-1.75756	8.49142	-17.7972	1.02e-05	0.000557592	4.45097
Adamtsl2	-1.75718	5.75591	-12.9844	4.81e-05	0.000771596	2.77386
Pygb	-1.75576	11.3975	-14.4454	2.85e-05	0.000627019	3.34898
Rhoq	-1.75521	8.86789	-18.112	9.37e-06	0.000555228	4.54168
Polr2f	-1.75379	10.484	-18.6199	8.17e-06	0.000538869	4.68406
Asb12	-1.75313	7.88883	-10.8771	0.000113559	0.00108651	1.80903
Paip2	-1.75307	10.0401	-18.3369	8.81e-06	0.000540695	4.60531
Zfp943	-1.75167	6.74487	-17.7262	1.04e-05	0.000557592	4.43024
Jarid2	-1.75029	8.427	-15.8566	1.8e-05	0.000570755	3.84586
Ice2	-1.74873	5.67907	-5.13396	0.00365598	0.0102985	-2.18457
Susd2	-1.74841	5.60274	-15.048	2.33e-05	0.000589326	3.56761
Arl6ip6	-1.74753	5.98896	-11.4515	8.85e-05	0.000971961	2.09017
Aass	-1.74678	3.94114	-12.5662	5.64e-05	0.000824471	2.59621
Fyco1	-1.74654	10.2677	-17.8263	1.01e-05	0.000557592	4.45943
Olfr1537	-1.74643	3.00715	-8.68983	0.000332568	0.00193955	0.583063
Ipp	-1.74641	5.5034	-14.4248	2.87e-05	0.000628869	3.34132
Snx32	-1.74629	6.1357	-16.0337	1.71e-05	0.000567583	3.90459
Ebf1	-1.74501	6.95919	-18.097	9.41e-06	0.000555228	4.53741
Slc25a38	-1.74402	7.843	-10.6829	0.000123873	0.0011394	1.71056
Myadml2	-1.74348	6.99067	-10.4711	0.000136424	0.00119517	1.60107
Gjb1	-1.7434	4.83853	-10.3331	0.000145423	0.00123208	1.52851
Intu	-1.74328	6.60999	-14.6137	2.69e-05	0.000617117	3.41109
Gca	-1.74321	7.56038	-18.4472	8.56e-06	0.000539326	4.63619
Osbp2	-1.74032	7.24911	-17.6372	1.07e-05	0.000557592	4.40414
mt-Ty	-1.73968	6.04743	-13.2732	4.32e-05	0.000735472	2.89299
Ppif	-1.73889	11.1985	-18.3404	8.81e-06	0.000540695	4.6063
Jmjd8	-1.73739	9.41449	-16.9322	1.31e-05	0.000557592	4.19142
Lrrc2	-1.73671	11.4142	-11.6992	7.98e-05	0.000932417	2.20695
Rilpl1	-1.7364	9.3097	-18.3259	8.84e-06	0.000540695	4.60222
Tmem47	-1.73606	9.33762	-17.7762	1.03e-05	0.000557592	4.44487
Fbrsl1	-1.73481	7.3063	-14.2868	3.01e-05	0.000637739	3.28974
Slc47a1	-1.73387	8.58624	-17.7516	1.03e-05	0.000557592	4.43768
Ide	-1.73312	9.23446	-18.0764	9.46e-06	0.000555525	4.53154
Fign	-1.73288	5.29284	-18.0942	9.41e-06	0.000555228	4.53661
0610009O20Rik	-1.73281	8.62343	-17.4489	1.13e-05	0.000557592	4.34831
Ift81	-1.73231	6.07256	-15.5367	1.99e-05	0.000580081	3.73778
Tmem53	-1.7323	7.46032	-14.8047	2.53e-05	0.000603993	3.48055
Glt8d2	-1.73217	4.36425	-17.8781	9.99e-06	0.000557592	4.47446
Def8	-1.73088	7.79099	-15.6755	1.91e-05	0.000575745	3.78498
Ifna12	-1.72997	3.28402	-15.9893	1.73e-05	0.000567583	3.88994
Vps13c	-1.72937	7.9086	-15.1751	2.24e-05	0.000586199	3.61249
Gbp4	-1.72917	6.31331	-5.12538	0.00368246	0.0103471	-2.19289
Egln1	-1.7284	10.5801	-16.5559	1.46e-05	0.000563494	4.07352
Ptprd	-1.72835	6.45519	-13.9306	3.41e-05	0.000669764	3.15395
Map3k5	-1.72765	8.31765	-11.9423	7.22e-05	0.000898789	2.31909
Cyp2c70	-1.72737	3.68211	-8.47881	0.000373579	0.00207518	0.449445
Sbk1	-1.72633	7.71469	-17.2096	1.21e-05	0.000557592	4.27636
Dexi	-1.72607	8.32641	-18.3756	8.72e-06	0.000540695	4.61617
R3hdm2	-1.72587	9.73705	-16.8508	1.34e-05	0.000557592	4.16619
Aqp8	-1.72549	4.62333	-14.9638	2.4e-05	0.000593582	3.53767
Col14a1	-1.72518	6.39829	-6.11437	0.00169177	0.0058131	-1.29425
Pdp2	-1.72483	6.25848	-11.5756	8.4e-05	0.000950039	2.14901
Haus1	-1.72466	6.52889	-11.3382	9.29e-05	0.000991098	2.03589
Cnot4	-1.72402	8.45743	-12.9035	4.95e-05	0.000780843	2.73996
Cln6	-1.72349	8.59253	-18.4938	8.45e-06	0.000538869	4.64915
Tnrc6b	-1.72341	8.38814	-17.2916	1.18e-05	0.000557592	4.30116
Tanc1	-1.72311	7.07376	-15.7218	1.88e-05	0.000575525	3.80061
Tcea3	-1.72279	8.7511	-17.8399	1.01e-05	0.000557592	4.46338
Trmt5	-1.72165	7.27123	-18.4039	8.66e-06	0.000540695	4.62408
Lurap1l	-1.72088	5.62023	-16.7333	1.38e-05	0.000563022	4.12949
Ccni	-1.72064	9.45932	-12.4628	5.87e-05	0.000834829	2.55127
Zfp667	-1.72043	5.33358	-16.6141	1.43e-05	0.000563494	4.09198
Mmp2	-1.71979	9.34347	-12.7532	5.25e-05	0.000798944	2.67642
Abhd14b	-1.71963	5.40663	-12.4195	5.97e-05	0.000838283	2.53236
Ces3b	-1.71919	3.90525	-8.87233	0.000301355	0.00183305	0.696191
Zfp873	-1.71918	4.42899	-15.9597	1.75e-05	0.000567615	3.88014
Aars2	-1.71803	6.31834	-17.5259	1.1e-05	0.000557592	4.37123
Olfr1396	-1.718	5.44066	-9.41894	0.000226708	0.00155006	1.02223
Lmf1	-1.71723	8.78722	-16.8482	1.34e-05	0.000557592	4.16536
Extl3	-1.71675	8.51902	-15.0458	2.34e-05	0.000589326	3.56685
Slc2a4	-1.71645	9.96655	-15.4388	2.06e-05	0.00058168	3.70417
Prkaa2	-1.7153	10.3279	-15.3847	2.09e-05	0.000582741	3.6855
Cluap1	-1.7142	5.70243	-9.85026	0.000182996	0.00138685	1.26686
Myoc	-1.71232	3.85046	-13.1287	4.55e-05	0.000755662	2.83373
Adam4	-1.71151	3.78418	-7.94644	0.000506904	0.0025111	0.09815
Meis2	-1.71148	8.41351	-14.1047	3.21e-05	0.000653601	3.2208
Txlnb	-1.71017	10.8895	-14.8825	2.46e-05	0.000596557	3.50857
BC022713	-1.71003	7.10281	-14.224	3.08e-05	0.000643438	3.26608
Lamb2	-1.70938	9.72592	-15.7629	1.86e-05	0.00057488	3.81446
Cmtm4	-1.70773	6.66478	-17.0238	1.27e-05	0.000557592	4.21964
Mocs1	-1.70747	7.63327	-12.0858	6.81e-05	0.000874085	2.38417
Heyl	-1.70745	7.17206	-16.5969	1.44e-05	0.000563494	4.08653
Abca2	-1.7074	7.93334	-15.3061	2.15e-05	0.000582741	3.65825
Calcoco1	-1.70707	9.93163	-11.721	7.91e-05	0.000930215	2.21709
Lhpp	-1.70657	6.50648	-12.1819	6.56e-05	0.000858098	2.42727
Tbx20	-1.70617	9.99044	-17.5141	1.11e-05	0.000557592	4.36774
Reep6	-1.70591	8.35777	-17.0048	1.28e-05	0.000557592	4.21381
Pde6d	-1.70534	9.72219	-16.8104	1.35e-05	0.000557592	4.15359
Art4	-1.70409	5.91814	-11.2988	9.45e-05	0.000996149	2.01685
Cdh23	-1.70336	5.54838	-13.9227	3.42e-05	0.000670308	3.15089
Helz	-1.70334	8.32376	-15.4435	2.05e-05	0.00058168	3.7058
Ppp1r12b	-1.70302	9.27538	-17.5676	1.09e-05	0.000557592	4.38358
Slc17a5	-1.7029	8.10338	-15.1986	2.22e-05	0.000586199	3.62071
Arhgap5	-1.7024	7.98248	-10.4654	0.000136784	0.00119667	1.59809
Syt7	-1.7021	6.84289	-14.7716	2.56e-05	0.000607636	3.46859
Garem	-1.70117	8.06386	-16.2512	1.6e-05	0.000563494	3.97572
Btbd3	-1.70104	7.5585	-11.0389	0.00010574	0.00105422	1.88973
Sfxn4	-1.70076	6.13011	-17.1192	1.24e-05	0.000557592	4.24886
Gjc3	-1.69988	4.13145	-14.876	2.47e-05	0.000596557	3.50626
Slc37a4	-1.69983	6.79978	-15.0809	2.31e-05	0.000586286	3.57929
Gm9568	-1.69922	5.40363	-13.7073	3.69e-05	0.000695427	3.06685
Lrrc4c	-1.69712	4.06309	-16.8004	1.36e-05	0.000557592	4.15049
Cyp2c44	-1.69707	3.95336	-7.40775	0.000703387	0.00313095	-0.279726
Bhmt	-1.6965	4.92657	-7.29206	0.000756672	0.00329134	-0.364049
Prepl	-1.69594	9.7652	-15.221	2.21e-05	0.000586199	3.62857
Ubap2	-1.6958	9.86604	-14.8899	2.46e-05	0.000596557	3.51124
Abcc8	-1.69521	7.42619	-17.4339	1.13e-05	0.000557592	4.34386
Irx4	-1.69497	8.0147	-16.8759	1.33e-05	0.000557592	4.17398
Ndn	-1.69444	6.78738	-10.7845	0.000118345	0.00111164	1.7623
Farp2	-1.69418	6.5048	-17.7525	1.03e-05	0.000557592	4.43795
Fibin	-1.69407	5.53977	-11.2638	9.59e-05	0.00100042	1.99993
Bdh1	-1.69397	8.55362	-6.05007	0.00177402	0.00601457	-1.34915
Cpped1	-1.6939	8.3039	-17.6643	1.06e-05	0.000557592	4.41208
Trabd2b	-1.69282	9.80153	-12.6529	5.45e-05	0.000813468	2.63355
Kif16b	-1.69267	8.17443	-10.9882	0.000108115	0.00106407	1.86461
Dpf3	-1.69215	6.05073	-15.3228	2.14e-05	0.000582741	3.66407
Dph3	-1.69164	8.65154	-17.7509	1.03e-05	0.000557592	4.43746
Dirc2	-1.69035	8.72785	-17.0642	1.26e-05	0.000557592	4.23204
Hpd	-1.69019	4.83093	-6.05923	0.00176203	0.00598733	-1.3413
Ak1	-1.68972	10.5555	-16.1538	1.65e-05	0.000563494	3.94402
Etl4	-1.68937	7.09833	-15.4269	2.07e-05	0.000582741	3.70006
Nudt11	-1.68915	3.55707	-4.85133	0.00465909	0.0123222	-2.46399
Tln2	-1.688	7.61575	-16.3848	1.54e-05	0.000563494	4.01886
Itga9	-1.68776	8.30948	-10.4761	0.00013611	0.00119328	1.60369
Zmat1	-1.68707	4.94061	-16.312	1.57e-05	0.000563494	3.9954
Tbccd1	-1.68555	6.6595	-9.02932	0.000277261	0.00174529	0.791751
Synj2bp	-1.68515	7.5924	-17.1719	1.22e-05	0.000557592	4.26492
Kcnt2	-1.68452	5.62795	-15.6133	1.95e-05	0.00057831	3.76387
Hyal1	-1.68381	6.21022	-9.19395	0.000254413	0.00165441	0.890284
Sesn1	-1.68364	9.6585	-18.0362	9.56e-06	0.000557592	4.52003
Znrd1as	-1.68358	6.47037	-15.3081	2.15e-05	0.000582741	3.65897
LOC102642487	-1.68312	7.84648	-16.0456	1.7e-05	0.000567583	3.90851
Lingo3	-1.68294	7.88112	-17.7299	1.04e-05	0.000557592	4.43133
Mlip	-1.68275	9.73825	-17.9905	9.68e-06	0.000557592	4.50689
Rnls	-1.68262	6.20174	-17.9311	9.84e-06	0.000557592	4.4898
Gnb5	-1.68221	7.24943	-15.8255	1.82e-05	0.000570822	3.83545
4430402I18Rik	-1.68088	6.52584	-18.0664	9.48e-06	0.000555707	4.52866
Ppapdc3	-1.68056	7.72095	-17.0995	1.24e-05	0.000557592	4.24283
Ppp1r3c	-1.68005	9.8385	-8.62577	0.000344426	0.00197614	0.542819
D630003M21Rik	-1.67991	5.0983	-12.0714	6.85e-05	0.000876623	2.37765
Fitm1	-1.67987	10.1679	-15.2585	2.18e-05	0.000584826	3.64166
Snord82	-1.67968	9.3855	-17.6387	1.07e-05	0.000557592	4.40455
Mtcp1	-1.6794	5.26088	-16.1091	1.67e-05	0.000564396	3.92939
Phf20l1	-1.67925	8.04589	-16.4126	1.52e-05	0.000563494	4.0278
Spryd4	-1.67923	8.43023	-15.8567	1.8e-05	0.000570755	3.84589
Fkbp4	-1.67885	9.16834	-11.8541	7.49e-05	0.000914961	2.27866
Bbs9	-1.67885	7.20028	-17.7211	1.04e-05	0.000557592	4.42874
Nkiras1	-1.67743	7.24158	-8.83191	0.000307957	0.00185345	0.671326
Gm3893	-1.67622	6.00168	-2.23544	0.0756059	0.114842	-5.58768
Hnmt	-1.67588	5.49449	-11.6628	8.1e-05	0.000937679	2.18994
Bbs7	-1.67551	5.66209	-16.0774	1.69e-05	0.000567583	3.91897
Lman2l	-1.67534	7.42719	-12.1456	6.65e-05	0.000866261	2.41103
Hist1h4a	-1.67509	9.9962	-11.6074	8.29e-05	0.000944584	2.16396
Zswim7	-1.67489	5.41044	-12.9168	4.93e-05	0.000780621	2.74556
Rasgrf2	-1.67486	5.48257	-15.1632	2.25e-05	0.000586199	3.6083
Vldlr	-1.67457	10.376	-14.4555	2.84e-05	0.000626848	3.35274
Pdcd4	-1.67249	7.00098	-16.8919	1.32e-05	0.000557592	4.17895
Mpst	-1.67149	6.65001	-17.3086	1.17e-05	0.000557592	4.30627
Osr1	-1.67124	6.35917	-8.75774	0.000320524	0.00189303	0.625415
Cdh4	-1.67099	6.13354	-11.9029	7.34e-05	0.000905755	2.30108
Ostm1	-1.67087	8.2009	-14.7117	2.61e-05	0.000611527	3.44686
Npr3	-1.6706	7.56726	-15.3388	2.12e-05	0.000582741	3.66961
Map2k6	-1.67041	5.10415	-12.0809	6.83e-05	0.000874676	2.38192
Sox12	-1.67028	6.07483	-17.6245	1.07e-05	0.000557592	4.4004
Mrpl11	-1.67011	7.73817	-13.3243	4.24e-05	0.000727741	2.91377
Pole	-1.67006	4.25347	-12.2991	6.26e-05	0.00084575	2.47936
Psd3	-1.66992	6.61286	-12.8923	4.98e-05	0.00078125	2.73527
Zfp455	-1.66885	3.28584	-7.87376	0.000529204	0.0025886	0.04853
Zc3h8	-1.6687	4.97607	-12.4332	5.94e-05	0.000837958	2.53838
Birc6	-1.66866	8.94676	-16.1649	1.64e-05	0.000563494	3.94765
Polr3k	-1.66831	6.41659	-15.7721	1.85e-05	0.000573976	3.81754
Josd2	-1.66624	8.34025	-10.6151	0.000127738	0.00115778	1.67573
Cradd	-1.66619	6.54051	-15.2646	2.18e-05	0.00058432	3.6438
4631405J19Rik	-1.66619	5.37735	-12.4929	5.8e-05	0.000834573	2.56439
Slc22a23	-1.66609	7.39751	-12.802	5.15e-05	0.000794126	2.69714
Lrrc39	-1.66585	9.92148	-15.5823	1.97e-05	0.00057831	3.75333
Ric8b	-1.66578	7.97244	-16.3537	1.55e-05	0.000563494	4.00886
Zfp62	-1.66557	6.57111	-10.5021	0.000134496	0.00118833	1.61723
Exd2	-1.66534	6.61984	-9.71127	0.000195886	0.00142552	1.18919
Slc26a10	-1.66391	6.62493	-15.6866	1.9e-05	0.000575525	3.78873
Sspn	-1.66373	9.1734	-15.9967	1.73e-05	0.000567583	3.89239
Magix	-1.66363	6.54002	-16.3774	1.54e-05	0.000563494	4.01649
Rhbdd3	-1.66301	6.99919	-16.9516	1.3e-05	0.000557592	4.19741
Rapgef4	-1.66275	7.5423	-11.4697	8.79e-05	0.000970902	2.09886
Mvb12b	-1.66256	6.84755	-13.0957	4.61e-05	0.000758378	2.8201
Nabp2	-1.66161	9.91214	-16.6837	1.4e-05	0.000563494	4.11391
Cenpq	-1.66153	5.36428	-9.27242	0.000244315	0.00161434	0.936655
Gck	-1.66143	5.88013	-7.25037	0.000777034	0.00335508	-0.394718
Faf1	-1.6612	8.13551	-16.2122	1.62e-05	0.000563494	3.96305
Repin1	-1.66085	8.39854	-16.3549	1.55e-05	0.000563494	4.00927
Plg	-1.66078	5.27995	-7.54269	0.000646753	0.00295623	-0.182831
Mtss1l	-1.66072	7.64192	-15.3042	2.15e-05	0.000582741	3.6576
Deptor	-1.65922	6.92297	-16.1649	1.64e-05	0.000563494	3.94765
Cep70	-1.6592	4.43384	-15.9754	1.74e-05	0.000567615	3.88535
Rpl22	-1.65917	6.74342	-14.1586	3.15e-05	0.000650824	3.24131
Nxpe4	-1.65891	6.16562	-12.2675	6.34e-05	0.000847256	2.46539
Heatr5b	-1.65876	6.8733	-13.2342	4.38e-05	0.000742415	2.87709
1190007I07Rik	-1.65701	6.65082	-10.8215	0.000116405	0.00109939	1.78101
Pcp4l1	-1.65657	9.95144	-12.9341	4.9e-05	0.000778825	2.75282
Fbxo21	-1.65554	8.09394	-12.8349	5.08e-05	0.000789717	2.71106
Smpd1	-1.65513	11.0064	-16.4039	1.53e-05	0.000563494	4.02499
Rab17	-1.65482	5.75059	-16.3515	1.55e-05	0.000563494	4.00816
Pnkd	-1.65388	7.84573	-16.9389	1.3e-05	0.000557592	4.19349
Ttll5	-1.65304	6.47014	-15.8229	1.82e-05	0.000570822	3.83456
Slx1b	-1.65301	5.6348	-13.6331	3.79e-05	0.000704874	3.03758
Eepd1	-1.65293	7.12857	-17.1743	1.22e-05	0.000557592	4.26563
Gm22744	-1.65244	6.19974	-13.1268	4.56e-05	0.000755665	2.83295
Bcs1l	-1.65209	8.02591	-17.7486	1.04e-05	0.000557592	4.43681
Cygb	-1.65162	9.54232	-16.6895	1.4e-05	0.000563494	4.11573
Gm10825	-1.6515	3.9717	-14.3752	2.92e-05	0.00063283	3.32284
Col6a6	-1.65094	5.7623	-15.3487	2.12e-05	0.000582741	3.67304
Rhobtb2	-1.64975	7.2359	-17.6417	1.07e-05	0.000557592	4.40546
Mpp2	-1.64962	5.00161	-8.24792	0.000425538	0.00225558	0.299651
Tango2	-1.64904	9.97258	-17.6781	1.06e-05	0.000557592	4.41614
Mavs	-1.64841	9.1056	-10.2462	0.000151449	0.00126366	1.48235
Cyb5d1	-1.64787	8.06174	-15.7114	1.89e-05	0.000575525	3.79709
Rreb1	-1.64781	7.92973	-16.4346	1.51e-05	0.000563494	4.03486
Mat1a	-1.64778	4.5187	-10.6001	0.00012861	0.00116075	1.66801
Clcc1	-1.64752	9.01822	-16.547	1.46e-05	0.000563494	4.07069
Kif13a	-1.64605	8.482	-14.61	2.7e-05	0.000617117	3.40971
Gm13359	-1.64601	6.56035	-12.5629	5.64e-05	0.000824726	2.59478
Smdt1	-1.64419	9.97137	-16.3021	1.57e-05	0.000563494	3.99222
Lysmd2	-1.64361	6.06866	-15.4213	2.07e-05	0.000582741	3.69816
Ralgapa2	-1.64358	8.63334	-15.4791	2.03e-05	0.000581231	3.71803
Mff	-1.64318	9.96571	-17.0082	1.28e-05	0.000557592	4.21486
Ccnd2	-1.64312	9.79038	-17.3968	1.14e-05	0.000557592	4.33275
Arel1	-1.64296	9.43413	-17.0864	1.25e-05	0.000557592	4.23885
Cyp4a12b	-1.64276	3.6547	-4.62411	0.00570343	0.0143594	-2.69667
Lrrc20	-1.64213	8.15945	-17.0467	1.26e-05	0.000557592	4.22669
Cep85l	-1.64189	6.59172	-17.6158	1.07e-05	0.000557592	4.39783
Mup21	-1.64171	2.99069	-6.43232	0.00134549	0.00491646	-1.02938
Ptpn3	-1.64106	7.35507	-13.0641	4.66e-05	0.000762549	2.80703
Zfp759	-1.641	4.66775	-8.41059	0.000388105	0.0021261	0.405583
Pex10	-1.64091	7.66825	-15.4537	2.05e-05	0.000581652	3.70932
Cbfa2t3	-1.64063	7.19966	-17.0368	1.27e-05	0.000557592	4.22365
Tecr	-1.64052	11.4199	-12.1375	6.67e-05	0.000866261	2.40739
Cpox	-1.64047	7.58657	-11.9889	7.09e-05	0.000890322	2.34031
Gm11710	-1.63994	6.93211	-9.8246	0.000185298	0.00139461	1.2526
Drosha	-1.63986	7.43015	-11.3824	9.12e-05	0.000982118	2.05715
Pcdh12	-1.63976	6.69621	-13.3676	4.17e-05	0.000724575	2.93134
Olfml1	-1.63936	4.85466	-15.4782	2.03e-05	0.000581231	3.71771
Zfp521	-1.63934	7.06576	-14.6715	2.64e-05	0.000614376	3.4322
Nfatc3	-1.63886	8.0667	-16.4625	1.5e-05	0.000563494	4.04377
Gm14122	-1.63879	4.85947	-9.93674	0.000175484	0.00135616	1.31464
Klhl30	-1.63875	7.81392	-16.9453	1.3e-05	0.000557592	4.19546
Dars2	-1.63867	6.38114	-17.2194	1.2e-05	0.000557592	4.27932
Itfg1	-1.63813	9.22711	-11.2802	9.52e-05	0.000997185	2.00786
Lenep	-1.63745	6.95019	-10.1243	0.000160421	0.00130346	1.41687
Ltbp1	-1.63696	7.90623	-14.0431	3.28e-05	0.000661075	3.19726
Serpini1	-1.63648	4.89924	-8.76049	0.000320048	0.00189206	0.627124
Arhgap19	-1.63635	4.86988	-9.11451	0.000265146	0.00169908	0.842954
Zfp68	-1.63609	7.55439	-17.2028	1.21e-05	0.000557592	4.27429
Tlr3	-1.6359	6.06451	-9.20073	0.000253522	0.00165127	0.894304
Slc25a12	-1.63507	11.1552	-17.3789	1.15e-05	0.000557592	4.32739
Ikzf2	-1.63481	5.72989	-9.73403	0.000193704	0.00141946	1.20198
Cyp2d26	-1.63476	5.13801	-5.72938	0.0022618	0.00718413	-1.63001
Nck2	-1.63448	6.48528	-16.0415	1.7e-05	0.000567583	3.90718
Gpld1	-1.63334	4.76066	-14.6559	2.66e-05	0.00061523	3.4265
Plag1	-1.6332	5.01537	-16.5382	1.47e-05	0.000563494	4.06789
Kmt2c	-1.63253	8.00516	-15.4053	2.08e-05	0.000582741	3.69264
Dcaf4	-1.63238	6.55869	-12.0115	7.02e-05	0.000887326	2.35056
H1f0	-1.63106	8.84686	-14.8637	2.48e-05	0.000596994	3.50184
Csdc2	-1.63087	8.28303	-16.0035	1.72e-05	0.000567583	3.89462
Ivns1abp	-1.63073	11.4894	-17.205	1.21e-05	0.000557592	4.27497
Chchd3	-1.62975	11.1241	-15.9082	1.78e-05	0.000570078	3.86305
Ttc30a1	-1.62953	4.22442	-11.6918	8.01e-05	0.000934383	2.2035
Pltp	-1.62851	7.91981	-9.98149	0.000171742	0.00134739	1.33921
Sirt3	-1.62842	7.3185	-16.361	1.55e-05	0.000563494	4.01122
Apoa2	-1.62782	5.97821	-6.80918	0.00103769	0.00410024	-0.729005
Cdo1	-1.62636	4.84084	-7.27597	0.000764456	0.00331556	-0.375868
1810010H24Rik	-1.62403	5.40999	-17.454	1.12e-05	0.000557592	4.34985
Paics	-1.62374	10.3386	-16.4897	1.49e-05	0.000563494	4.05244
Ubl7	-1.62314	9.92089	-15.3604	2.11e-05	0.000582741	3.67712
Tmem255a	-1.6231	4.10209	-7.99711	0.000492018	0.00246897	0.132494
Slc41a1	-1.62261	8.74957	-16.4569	1.5e-05	0.000563494	4.04198
Myzap	-1.62234	10.2056	-15.1487	2.26e-05	0.000586199	3.60319
Ptpn14	-1.62195	7.99337	-13.3735	4.16e-05	0.000723688	2.93372
Lmbr1	-1.62114	4.9518	-14.3368	2.96e-05	0.000634123	3.3085
Zfp629	-1.62037	5.54837	-13.9208	3.42e-05	0.000670308	3.15016
Fn3krp	-1.62011	6.43903	-10.9717	0.000108906	0.00106516	1.85637
Slco1b2	-1.62008	3.40917	-14.4871	2.81e-05	0.000626032	3.36444
3830406C13Rik	-1.61901	6.32827	-15.5983	1.96e-05	0.00057831	3.75877
Best3	-1.61871	5.66484	-13.9834	3.34e-05	0.000663401	3.17432
Disp1	-1.61842	6.66619	-17.3312	1.16e-05	0.000557592	4.31307
Agtr1a	-1.61746	8.81498	-13.3261	4.23e-05	0.000727741	2.91451
C8g	-1.61724	4.89307	-10.2181	0.000153464	0.00127258	1.46732
Elovl3	-1.61722	3.90696	-6.12951	0.00167306	0.0057627	-1.28139
Kdm1b	-1.61682	6.08138	-16.033	1.71e-05	0.000567583	3.90437
Pknox2	-1.61673	6.30906	-15.2814	2.16e-05	0.000583759	3.64967
Rxra	-1.61626	7.9826	-17.1544	1.22e-05	0.000557592	4.25959
Stmn1	-1.61625	7.09575	-11.4228	8.96e-05	0.000975754	2.07646
Epc2	-1.61568	7.53684	-16.116	1.67e-05	0.000564396	3.93163
Gsta3	-1.61543	5.70237	-11.5516	8.49e-05	0.0009547	2.13766
Mrgprf	-1.61528	5.15621	-11.6107	8.28e-05	0.000944064	2.16553
Rnf139	-1.61456	7.97218	-12.3193	6.21e-05	0.000845577	2.48832
Sun1	-1.61401	7.80522	-13.0398	4.71e-05	0.000767432	2.79695
Syne2	-1.61385	6.81396	-16.9025	1.32e-05	0.000557592	4.18222
Trpm3	-1.61381	4.35598	-12.6487	5.46e-05	0.000813468	2.63173
Tex38	-1.61292	3.93795	-7.36202	0.000723899	0.00319522	-0.312916
Zfp362	-1.61267	7.35584	-17.1929	1.21e-05	0.000557592	4.2713
Tmem8b	-1.61108	7.29819	-13.9845	3.34e-05	0.000663401	3.17474
Zfp81	-1.61083	5.19585	-9.38655	0.000230467	0.00156286	1.00342
Tmem150c	-1.61082	6.82413	-16.9953	1.28e-05	0.000557592	4.21089
Nutf2	-1.61057	9.1423	-16.1945	1.63e-05	0.000563494	3.95729
Vps26b	-1.61056	9.08238	-15.2703	2.17e-05	0.000583906	3.64578
Mr1	-1.61043	8.08924	-16.8529	1.34e-05	0.000557592	4.16683
Gm25635	-1.60982	4.41758	-6.94818	0.000945728	0.00384343	-0.621731
Ndufa13	-1.60974	8.34324	-13.3265	4.23e-05	0.000727741	2.91467
Efr3a	-1.60925	8.93824	-15.942	1.76e-05	0.000567615	3.87427
Klhl23	-1.60904	7.44363	-16.6415	1.42e-05	0.000563494	4.10064
Gbp9	-1.60903	6.3455	-5.7775	0.00217939	0.00698844	-1.58711
Slc22a5	-1.60889	7.23711	-12.1908	6.53e-05	0.000857379	2.43123
C1galt1	-1.60843	8.21806	-10.9223	0.000111308	0.00107793	1.83169
Ccnt2	-1.60833	7.94874	-17.1167	1.24e-05	0.000557592	4.24811
Foxp2	-1.6082	4.97849	-16.6633	1.41e-05	0.000563494	4.10749
Lgi3	-1.60807	5.34018	-16.8235	1.35e-05	0.000557592	4.15769
Adcy5	-1.60777	7.76472	-10.1	0.000162284	0.00131419	1.40373
Ift172	-1.60761	6.58384	-11.6584	8.12e-05	0.000938096	2.18791
Zfand6	-1.60748	7.7953	-14.2697	3.03e-05	0.00063893	3.2833
Hexdc	-1.60705	5.40059	-9.02278	0.000278217	0.00174864	0.787807
Lama5	-1.60638	8.02049	-12.6522	5.45e-05	0.000813468	2.63324
1110057K04Rik	-1.60616	7.03662	-11.4188	8.98e-05	0.000975779	2.07456
G730007D18Rik	-1.60614	4.21528	-11.2399	9.69e-05	0.00100545	1.98832
Tcaim	-1.6051	8.03533	-13.7837	3.59e-05	0.000685695	3.09682
5730455P16Rik	-1.60503	6.75613	-11.3455	9.26e-05	0.000991098	2.03938
Lrrc17	-1.60455	5.47469	-8.82931	0.000308388	0.00185439	0.669717
Anpep	-1.60425	7.14924	-8.4753	0.000374311	0.00207859	0.447195
Zcrb1	-1.60422	11.1999	-15.5686	1.97e-05	0.000578471	3.74866
Rmdn1	-1.60408	6.67591	-16.1738	1.64e-05	0.000563494	3.95054
Mterfd1	-1.60248	7.1412	-14.5562	2.75e-05	0.000620301	3.38995
Acss2	-1.60232	8.07709	-14.6398	2.67e-05	0.000616876	3.42061
Sobp	-1.60216	7.63118	-13.7417	3.64e-05	0.000690249	3.08039
1810011O10Rik	-1.60192	7.81758	-16.0331	1.71e-05	0.000567583	3.90438
Tmem126b	-1.60173	7.40238	-13.1403	4.53e-05	0.000755329	2.83852
Stc2	-1.60166	6.41883	-10.6322	0.000126748	0.00115255	1.68455
Phf2	-1.60105	8.51335	-15.6655	1.92e-05	0.000575745	3.7816
Pkia	-1.60041	9.35469	-16.6381	1.42e-05	0.000563494	4.09955
Nbeal1	-1.60029	8.75538	-13.9445	3.39e-05	0.000668105	3.15934
Tek	-1.59997	8.73575	-7.64346	0.000607963	0.00284219	-0.111464
Ptpn4	-1.59965	7.76713	-10.7628	0.000119501	0.00111399	1.75128
Igkv4-57	-1.59789	4.29943	-7.53719	0.000648951	0.00296053	-0.186747
Pdpr	-1.5976	10.0834	-13.9846	3.34e-05	0.000663401	3.17478
Tenm3	-1.59752	5.27473	-14.7273	2.59e-05	0.000611527	3.45253
Fmo5	-1.59597	6.852	-17.0854	1.25e-05	0.000557592	4.23853
Myadm	-1.59539	10.5941	-12.2792	6.31e-05	0.000846586	2.47055
Grtp1	-1.59475	4.84543	-14.5436	2.76e-05	0.000621059	3.38532
Mfap3l	-1.59455	6.2552	-12.9591	4.85e-05	0.000775375	2.76328
Trmt2b	-1.59401	8.67865	-13.8425	3.51e-05	0.000683116	3.11979
Rbbp7	-1.59394	9.84257	-16.1555	1.65e-05	0.000563494	3.94456
1110012L19Rik	-1.59256	6.16965	-14.1421	3.17e-05	0.000651914	3.23502
Apoh	-1.59224	4.1131	-8.35506	0.000400427	0.0021744	0.369635
Rhot2	-1.5921	8.81949	-16.8856	1.32e-05	0.000557592	4.17698
Oma1	-1.59144	7.19668	-11.7257	7.89e-05	0.000930131	2.21931
Mrpl51	-1.59102	9.47603	-14.5555	2.75e-05	0.000620301	3.38968
LOC102641264	-1.59086	10.0706	-13.3025	4.27e-05	0.000729142	2.90491
Nebl	-1.5908	9.01789	-14.2082	3.09e-05	0.000644763	3.2601
Mrps23	-1.59064	9.48526	-16.5396	1.47e-05	0.000563494	4.06834
Alg6	-1.58995	5.45458	-8.26845	0.000420586	0.00223865	0.313123
Egflam	-1.58945	5.58691	-14.3926	2.9e-05	0.000632476	3.32935
Kif1c	-1.58924	8.92968	-15.111	2.29e-05	0.000586199	3.58991
Adal	-1.58916	5.68206	-16.1211	1.66e-05	0.000564396	3.9333
Ankrd46	-1.58898	7.63222	-16.9971	1.28e-05	0.000557592	4.21144
Sun3	-1.5889	3.449	-15.9948	1.73e-05	0.000567583	3.89175
Tspan31	-1.58874	9.40997	-16.3973	1.53e-05	0.000563494	4.02288
Cbr1	-1.58873	6.59549	-9.67136	0.000199786	0.00144521	1.16669
Mef2a	-1.58866	10.6876	-15.1161	2.28e-05	0.000586199	3.59172
Tspan2	-1.5877	6.43175	-7.82742	0.000544031	0.00263912	0.0166755
Scrn1	-1.5877	6.15104	-7.604	0.000622813	0.0028848	-0.139307
Pbx3	-1.58742	7.84589	-16.2537	1.6e-05	0.000563494	3.97653
Chp2	-1.58721	4.81438	-10.9148	0.000111676	0.00107925	1.82796
Entpd2	-1.58645	6.50585	-15.1114	2.29e-05	0.000586199	3.59006
Senp7	-1.58608	5.92932	-8.65239	0.000339438	0.00195883	0.559579
Dennd4c	-1.58554	8.30547	-11.7896	7.69e-05	0.000927057	2.24893
Mcc	-1.58513	7.62933	-14.6977	2.62e-05	0.00061195	3.44177
Nudt7	-1.585	8.33424	-16.1352	1.66e-05	0.000564396	3.93792
BC025933	-1.58482	4.96921	-9.53245	0.000214098	0.0015003	1.08766
Mir30e	-1.58429	3.75365	-9.47229	0.000220674	0.00152527	1.05308
Fbp1	-1.58403	4.02252	-7.56563	0.000637668	0.00293062	-0.166506
Nfib	-1.5839	9.33202	-16.1806	1.63e-05	0.000563494	3.95276
Hhatl	-1.58382	9.61263	-14.3299	2.97e-05	0.000634123	3.3059
Pla2g2d	-1.58333	5.39972	-8.41006	0.000388222	0.00212626	0.405237
St5	-1.58233	7.06653	-16.2465	1.6e-05	0.000563494	3.97419
Sdpr	-1.58191	8.10045	-11.7662	7.76e-05	0.000929062	2.2381
Nox4	-1.58168	4.52968	-7.24368	0.000780362	0.00336416	-0.399654
Atm	-1.58099	5.83552	-12.9243	4.92e-05	0.000779849	2.7487
Hacl1	-1.58074	5.59093	-11.4033	9.04e-05	0.000980776	2.06716
Mcee	-1.58	10.799	-16.9302	1.31e-05	0.000557592	4.1908
Syde2	-1.57988	6.69764	-10.9589	0.00010952	0.00106814	1.85001
Dpyd	-1.57984	5.77133	-13.4643	4.02e-05	0.00071761	2.9703
Gm11992	-1.57964	4.15397	-9.42911	0.000225543	0.00154676	1.02812
Exoc4	-1.57896	8.09422	-15.9299	1.76e-05	0.000567615	3.87025
Gm13675	-1.57863	7.00178	-8.00792	0.000488908	0.00246102	0.139799
Rangrf	-1.57839	7.42137	-11.6241	8.23e-05	0.000941885	2.17181
Tbc1d7	-1.57828	7.0399	-14.7583	2.57e-05	0.000609135	3.46376
0610009B22Rik	-1.57766	8.13383	-12.6989	5.36e-05	0.000807896	2.65326
Mug1	-1.57762	5.10477	-5.74414	0.00223614	0.00712322	-1.61682
Tmem67	-1.5775	5.16068	-7.97062	0.000499735	0.00249219	0.114563
Tmem69	-1.57733	5.76604	-16.1737	1.64e-05	0.000563494	3.95052
Plcg1	-1.57722	8.18409	-15.4646	2.04e-05	0.000581652	3.71306
Rbbp9	-1.57679	7.39685	-16.9444	1.3e-05	0.000557592	4.19518
Arhgap6	-1.57617	5.4289	-10.8931	0.000112753	0.00108212	1.81709
Arhgap20	-1.57615	8.51252	-7.76961	0.000563221	0.00270149	-0.0232951
Opa3	-1.57604	8.61837	-15.4549	2.05e-05	0.000581652	3.70971
Mir133a-1	-1.57529	3.43979	-10.8152	0.000116731	0.00110162	1.77785
Rgma	-1.57508	6.92918	-13.5163	3.95e-05	0.000713302	2.99113
Cacna2d2	-1.57449	5.18925	-5.35587	0.00304266	0.0089675	-1.97264
Itfg3	-1.57429	8.91787	-14.0152	3.31e-05	0.000662548	3.18655
Ypel2	-1.5723	7.0529	-15.1954	2.22e-05	0.000586199	3.61959
Znrf1	-1.57219	8.37874	-16.1846	1.63e-05	0.000563494	3.95407
2310016G11Rik	-1.57073	4.38713	-10.0582	0.000165544	0.00132858	1.38108
Aldh5a1	-1.57072	6.86996	-12.4814	5.83e-05	0.000834589	2.55938
Ehd2	-1.57049	9.31408	-15.4577	2.05e-05	0.000581652	3.71066
Mcoln1	-1.56989	9.08235	-15.6392	1.93e-05	0.000576937	3.77269
Vps37a	-1.56985	8.44515	-16.6825	1.41e-05	0.000563494	4.11355
Kcnj8	-1.56908	8.86112	-14.0712	3.24e-05	0.000657931	3.20801
Smco4	-1.56867	6.02335	-12.3277	6.19e-05	0.000845538	2.49201
Ncoa1	-1.56752	7.8128	-15.7244	1.88e-05	0.000575525	3.80149
Fzd4	-1.56659	8.30107	-14.9578	2.4e-05	0.000593582	3.53555
Arhgef17	-1.56659	8.28911	-15.1544	2.25e-05	0.000586199	3.6052
Sumo1	-1.56645	8.08466	-11.9714	7.14e-05	0.000894608	2.33234
Bank1	-1.56598	4.66244	-11.4547	8.84e-05	0.00097195	2.09172
Acsf3	-1.56562	6.38943	-16.694	1.4e-05	0.000563494	4.11717
Zfp758	-1.56532	5.13263	-8.6644	0.000337216	0.00195627	0.567121
Ctf1	-1.56516	5.57605	-16.7949	1.36e-05	0.000557592	4.14878
Cd28	-1.56508	5.5854	-7.91856	0.000515325	0.00254268	0.0791616
Tbck	-1.5649	8.01836	-15.7171	1.88e-05	0.000575525	3.79904
Usp11	-1.56484	5.21543	-15.3809	2.1e-05	0.000582741	3.68421
Zfp174	-1.56439	4.98323	-14.0843	3.23e-05	0.000656591	3.21302
Synpo2	-1.56424	8.72019	-12.6128	5.54e-05	0.000818179	2.61629
Manba	-1.56366	7.25503	-7.34826	0.00073021	0.00321662	-0.32294
Pdzd2	-1.56351	7.88613	-14.3447	2.95e-05	0.000634123	3.31147
Phc3	-1.56274	7.20562	-16.417	1.52e-05	0.000563494	4.02922
Ndufc1	-1.56247	10.1864	-16.7417	1.38e-05	0.00056258	4.13212
Adi1	-1.56191	8.08614	-15.9073	1.78e-05	0.000570078	3.86274
Agrn	-1.56182	6.96187	-15.1539	2.26e-05	0.000586199	3.60502
Rcan2	-1.5618	10.5702	-16.3089	1.57e-05	0.000563494	3.99443
Rgs7	-1.56173	4.10247	-12.0034	7.05e-05	0.00088742	2.34688
Pomt1	-1.56171	6.98554	-9.77563	0.000189788	0.00140738	1.22529
Ephb3	-1.56107	5.98937	-16.757	1.37e-05	0.000560984	4.13693
Naa60	-1.56032	9.20428	-14.5742	2.73e-05	0.000619523	3.39657
Rorc	-1.56009	8.38255	-15.4882	2.03e-05	0.000581231	3.72116
4930578G10Rik	-1.55949	3.68529	-13.5414	3.91e-05	0.000713165	3.00114
Lin52	-1.55903	7.03941	-12.8071	5.14e-05	0.000794029	2.69931
Mettl15	-1.55873	6.01716	-15.7035	1.89e-05	0.000575525	3.79445
Fam126b	-1.55835	7.03306	-9.61547	0.000205404	0.00146829	1.13502
Tmem177	-1.55809	6.93235	-15.2049	2.22e-05	0.000586199	3.62292
Gstm6	-1.55803	4.07091	-13.3574	4.18e-05	0.000724915	2.9272
Ppp1r11	-1.55802	7.73201	-12.7248	5.3e-05	0.000802492	2.66429
Rnf14	-1.55748	9.79702	-9.77593	0.00018976	0.00140738	1.22546
Cdkl3	-1.55716	6.49692	-14.9039	2.45e-05	0.000596557	3.51624
Smim14	-1.55633	9.99984	-16.6549	1.42e-05	0.000563494	4.10486
Rapgef2	-1.55621	8.57318	-15.45	2.05e-05	0.000581652	3.70802
Nedd1	-1.55601	7.20931	-10.402	0.000140846	0.0012116	1.56485
Tmem243	-1.55531	8.14754	-15.5397	1.99e-05	0.000580081	3.7388
Gm10824	-1.55524	3.87859	-10.415	0.000140003	0.00120934	1.57166
Dact1	-1.55521	5.96074	-13.111	4.58e-05	0.000757508	2.82645
Mrs2	-1.5552	7.2871	-15.1936	2.23e-05	0.000586199	3.61898
Ptplad2	-1.55416	5.76021	-10.3687	0.000143037	0.0012219	1.54731
Kcnk3	-1.55384	8.8101	-13.183	4.46e-05	0.000748769	2.85611
Klhl42	-1.55315	6.98536	-7.46879	0.00067707	0.00304916	-0.235705
Pon3	-1.55275	7.63435	-11.5029	8.66e-05	0.00096258	2.11462
Ndufs7	-1.55272	12.7023	-15.9386	1.76e-05	0.000567615	3.87314
Usp13	-1.55261	9.87191	-15.9587	1.75e-05	0.000567615	3.87979
Zkscan8	-1.55233	6.22349	-8.15199	0.000449624	0.00233317	0.236272
Tpcn1	-1.55233	7.58386	-13.0162	4.75e-05	0.000768692	2.78714
Map2k5	-1.55193	6.23813	-16.5707	1.45e-05	0.000563494	4.07823
Cdnf	-1.55131	6.79218	-14.0165	3.31e-05	0.000662548	3.18706
Park2	-1.55056	6.34808	-12.8357	5.08e-05	0.000789717	2.7114
Serpina3c	-1.55055	4.28648	-15.5945	1.96e-05	0.00057831	3.75749
Fam96a	-1.55022	9.67512	-16.3888	1.53e-05	0.000563494	4.02015
Nudt12	-1.54975	6.80447	-9.30071	0.000240793	0.00160244	0.953277
Rgmb	-1.54962	7.5163	-12.5168	5.75e-05	0.000832105	2.57481
Klhl31	-1.54927	9.51369	-15.8426	1.81e-05	0.000570822	3.84117
Gatm	-1.54895	6.62218	-8.0812	0.00046844	0.00239536	0.189063
Prr12	-1.54847	6.71283	-14.8765	2.47e-05	0.000596557	3.50644
Irf2bp1	-1.54846	6.81475	-14.6513	2.66e-05	0.000615585	3.42482
Sssca1	-1.54803	7.4802	-9.85127	0.000182906	0.00138685	1.26742
Hscb	-1.54726	5.04784	-11.9024	7.34e-05	0.000905755	2.30083
Mettl17	-1.5468	5.95833	-12.2279	6.44e-05	0.000852224	2.44778
Kcnh2	-1.54545	7.80291	-9.93948	0.000175253	0.00135616	1.31615
Scaper	-1.54518	7.25367	-13.5037	3.97e-05	0.000713302	2.98606
Sox4	-1.54482	6.30782	-12.5716	5.63e-05	0.000824449	2.59855
Osbpl3	-1.54466	6.28156	-16.5364	1.47e-05	0.000563494	4.06734
1110002L01Rik	-1.54448	6.03757	-14.6329	2.68e-05	0.000616876	3.41812
Nedd4	-1.54446	10.8193	-14.6317	2.68e-05	0.000616876	3.41766
Clcn4-2	-1.5444	8.53828	-14.2388	3.06e-05	0.000641276	3.27167
Foxo1	-1.54423	7.58187	-15.1106	2.29e-05	0.000586199	3.58978
mt-Tk	-1.54418	11.4615	-5.38642	0.00296801	0.00879354	-1.94396
Gkap1	-1.54358	6.49662	-14.4555	2.84e-05	0.000626848	3.35274
Thnsl1	-1.54345	5.83782	-14.2516	3.05e-05	0.000640881	3.27648
9830147E19Rik	-1.54323	4.58219	-6.54834	0.00124046	0.00463629	-0.93538
Gm22245	-1.54308	5.13008	-15.1419	2.26e-05	0.000586199	3.60081
Optn	-1.54294	8.36257	-13.7824	3.59e-05	0.000685695	3.09634
Ednra	-1.54258	9.15151	-8.74147	0.000323361	0.00190374	0.615298
Zfp760	-1.5423	4.33869	-15.0015	2.37e-05	0.000592361	3.55112
Alkbh8	-1.54204	6.18231	-10.2306	0.000152567	0.0012685	1.47399
Mybpc3	-1.54144	11.8115	-15.8496	1.81e-05	0.000570755	3.84351
Zfp955a	-1.54089	7.32667	-7.35979	0.000724918	0.00319913	-0.31454
Capn3	-1.54064	5.49664	-11.7479	7.82e-05	0.000929062	2.22961
Tat	-1.54036	5.13546	-6.75958	0.00107305	0.00419323	-0.767737
Pgap2	-1.5402	8.73265	-15.2981	2.15e-05	0.000582741	3.65546
Lman2	-1.53984	8.94723	-12.6	5.56e-05	0.000820172	2.61077
Mylk	-1.53821	6.61855	-13.3179	4.25e-05	0.000727741	2.91117
Brip1os	-1.53804	6.59234	-13.7311	3.66e-05	0.00069123	3.07623
Srrm4	-1.53775	4.68618	-12.4874	5.81e-05	0.000834573	2.56203
Mmaa	-1.53664	6.83755	-9.12424	0.000263803	0.00169256	0.84877
Npepps	-1.53601	9.61442	-16.0995	1.67e-05	0.000565096	3.92622
Strbp	-1.53597	5.94975	-10.7174	0.000121962	0.0011281	1.72819
Mef2c	-1.53528	8.38741	-15.3094	2.14e-05	0.000582741	3.65942
Klhl3	-1.53456	6.03764	-15.274	2.17e-05	0.000583843	3.6471
C330018D20Rik	-1.53455	6.52868	-7.91882	0.000515244	0.00254268	0.0793436
Stox2	-1.53426	6.1334	-16.2528	1.6e-05	0.000563494	3.97624
Cdk5	-1.5341	7.48334	-15.995	1.73e-05	0.000567583	3.89182
Nrp1	-1.53374	9.39796	-8.19414	0.000438847	0.00229546	0.264203
Higd1a	-1.53367	7.20216	-8.12305	0.000457205	0.00235583	0.217019
Msh3	-1.53343	5.5672	-15.8125	1.83e-05	0.000571277	3.83111
Lage3	-1.53242	6.6382	-16.3593	1.55e-05	0.000563494	4.01065
Cyp2j6	-1.5315	5.76562	-16.303	1.57e-05	0.000563494	3.99251
Pcdhb18	-1.53094	4.0005	-6.01715	0.00181795	0.00612147	-1.37743
Timp2	-1.53072	8.61473	-14.54	2.76e-05	0.000621059	3.38399
Cript	-1.53071	9.81157	-11.7599	7.78e-05	0.000929062	2.2352
Slc29a1	-1.53059	8.08768	-13.3662	4.17e-05	0.000724575	2.93077
Gne	-1.52967	7.99027	-15.1213	2.28e-05	0.000586199	3.59355
Uba6	-1.52948	7.24126	-10.1337	0.000159708	0.00129985	1.42194
Taf2	-1.52888	8.11305	-14.8645	2.48e-05	0.000596994	3.5021
Eno3	-1.52856	12.2184	-12.74	5.27e-05	0.000800369	2.67079
Cdh19	-1.52841	4.84158	-11.5138	8.62e-05	0.00096243	2.11981
Rin2	-1.52748	7.28249	-15.3411	2.12e-05	0.000582741	3.67041
Ucma	-1.52743	5.22105	-12.4461	5.91e-05	0.000835871	2.54402
Cnnm2	-1.52729	6.45114	-14.3424	2.95e-05	0.000634123	3.31059
Ccnjl	-1.52692	5.04209	-10.0306	0.000167743	0.00133625	1.36605
Gas6	-1.52677	9.04437	-14.7972	2.53e-05	0.000604278	3.47785
Vwa8	-1.52668	10.3549	-14.875	2.47e-05	0.000596557	3.50589
Nmrk1	-1.52621	4.81116	-13.5623	3.88e-05	0.000712559	3.00948
Cacybp	-1.52608	10.3889	-13.6099	3.82e-05	0.000705507	3.02839
Rab3d	-1.526	6.45159	-16.3606	1.55e-05	0.000563494	4.01108
Bex1	-1.5258	2.93332	-7.99485	0.000492669	0.00247121	0.130971
Apc2	-1.52545	5.25572	-10.5094	0.000134051	0.00118597	1.621
Lmbrd1	-1.52496	7.67184	-16.3529	1.55e-05	0.000563494	4.0086
Wdr41	-1.5249	8.84885	-13.1474	4.52e-05	0.000754811	2.84143
Slco5a1	-1.52462	5.99497	-8.08965	0.000466144	0.00238715	0.19472
Erc1	-1.52425	6.89342	-12.6118	5.54e-05	0.000818179	2.61588
Reln	-1.52354	5.80489	-9.88337	0.000180076	0.00137624	1.2852
Taf9b	-1.5233	8.99104	-9.62148	0.00020479	0.0014665	1.13844
Tsc2	-1.52323	9.6186	-15.5159	2.01e-05	0.000581188	3.73065
Cilp	-1.52322	5.514	-12.1354	6.68e-05	0.000866261	2.40647
Slc25a34	-1.52321	8.46895	-16.0351	1.71e-05	0.000567583	3.90507
Gpr89	-1.52318	7.36781	-15.0834	2.31e-05	0.000586286	3.58015
Slc17a7	-1.52296	7.00638	-13.4081	4.11e-05	0.000723688	2.94768
Cpxm1	-1.52281	5.64888	-13.6656	3.74e-05	0.000700482	3.05043
Pdp1	-1.52259	9.47812	-14.8497	2.49e-05	0.000597981	3.49679
Glo1	-1.52251	8.20218	-14.7483	2.58e-05	0.00061056	3.46015
Polr2j	-1.52238	8.13397	-14.8787	2.47e-05	0.000596557	3.50721
Ube2d1	-1.52155	9.60591	-13.8288	3.53e-05	0.000683701	3.11443
Prrx1	-1.52024	8.76403	-13.6162	3.81e-05	0.000705507	3.03088
Zbtb10	-1.52023	6.89006	-11.2957	9.46e-05	0.000996158	2.01537
Sdc2	-1.52015	7.5546	-8.20826	0.000435306	0.00228335	0.273529
Lrp4	-1.51992	5.931	-11.6284	8.22e-05	0.000941885	2.17385
Cdon	-1.51967	4.946	-14.5518	2.75e-05	0.00062049	3.38833
Tmem64	-1.51955	7.74248	-13.1993	4.44e-05	0.000746794	2.86278
Aldh7a1	-1.51953	8.37803	-15.812	1.83e-05	0.000571277	3.83092
Mdga1	-1.51943	5.85577	-9.30236	0.000240589	0.00160231	0.954248
Mrps21	-1.51932	9.71776	-11.7025	7.97e-05	0.000931591	2.20849
Kcnj2	-1.51924	7.11097	-15.6417	1.93e-05	0.000576937	3.77351
Dolk	-1.51877	6.28021	-6.40103	0.00137559	0.00499627	-1.05497
Zfp677	-1.51842	3.51749	-13.4001	4.12e-05	0.000723688	2.94447
Fam89b	-1.51829	7.93385	-14.9302	2.43e-05	0.000593895	3.52568
Gnpda1	-1.51802	7.44448	-10.5896	0.000129226	0.00116414	1.66259
Abcb10	-1.51734	6.90568	-12.5759	5.62e-05	0.000823936	2.60039
Dnajc15	-1.51711	9.18831	-15.6143	1.95e-05	0.00057831	3.76423
Ormdl1	-1.51658	6.05429	-7.81846	0.000546951	0.00264851	0.0105031
Pigz	-1.51643	5.60096	-11.7983	7.66e-05	0.000924927	2.25297
Coprs	-1.51623	6.19893	-9.36718	0.00023275	0.00157007	0.992149
Naa40	-1.51615	7.07662	-13.6241	3.8e-05	0.000705061	3.03399
Rtn4rl1	-1.51599	6.70861	-9.39866	0.000229053	0.00155976	1.01046
Ctnna3	-1.51593	8.18815	-12.9411	4.88e-05	0.000777557	2.75577
Aaed1	-1.51591	8.63212	-13.3102	4.26e-05	0.000727741	2.90806
Abcd1	-1.51556	7.68533	-15.9332	1.76e-05	0.000567615	3.87136
Ehhadh	-1.51543	5.87244	-7.1896	0.000807897	0.00344002	-0.43971
Hpx	-1.51538	5.11701	-3.71896	0.0137083	0.028575	-3.69897
Scd2	-1.51472	7.79363	-9.64937	0.000201974	0.00145324	1.15425
Pde8b	-1.51375	5.27742	-15.6329	1.94e-05	0.000577381	3.77052
Klhl7	-1.51356	7.98894	-14.3327	2.96e-05	0.000634123	3.30696
Zfp273	-1.51261	3.91824	-12.006	7.04e-05	0.000887404	2.34807
Gstz1	-1.51239	7.11612	-15.6527	1.92e-05	0.000576633	3.77726
Mkrn2	-1.51231	8.50116	-14.5718	2.73e-05	0.000619523	3.3957
Sparcl1	-1.51217	10.5823	-11.4575	8.83e-05	0.00097195	2.09303
Prss53	-1.51216	4.59935	-11.9056	7.33e-05	0.000905755	2.30231
Usp21	-1.51179	8.34494	-14.6249	2.68e-05	0.000616931	3.41516
Cd34	-1.51168	10.3363	-9.78435	0.000188979	0.00140526	1.23016
Dnm3	-1.51161	5.34895	-7.48534	0.000670134	0.00302692	-0.22382
Fam131a	-1.51151	6.64948	-13.9388	3.4e-05	0.000668377	3.15713
Ube2w	-1.51121	6.50825	-15.6028	1.95e-05	0.00057831	3.76032
Bcl2	-1.51084	8.31287	-9.44264	0.000224003	0.00153983	1.03596
Clip3	-1.5106	6.57995	-16.215	1.62e-05	0.000563494	3.96398
Adh5	-1.51059	8.19883	-15.778	1.85e-05	0.000573976	3.81952
Negr1	-1.51049	5.37345	-11.5507	8.49e-05	0.0009547	2.13723
Lclat1	-1.51039	10.3139	-13.0228	4.74e-05	0.000768692	2.78986
As3mt	-1.51031	8.67322	-13.6105	3.82e-05	0.000705507	3.02863
Fzd7	-1.51026	6.55124	-15.5633	1.98e-05	0.000578471	3.74686
Ace	-1.50827	8.62244	-15.7205	1.88e-05	0.000575525	3.80017
Rfc1	-1.50793	7.08197	-14.6645	2.65e-05	0.000614413	3.42966
Gab1	-1.50697	8.791	-12.4924	5.8e-05	0.000834573	2.56417
9130221H12Rik	-1.50695	6.23455	-12.4568	5.88e-05	0.000834829	2.54868
Cmya5	-1.50684	10.2908	-14.4273	2.87e-05	0.000628869	3.34227
Plekhh1	-1.50651	4.45961	-14.0481	3.27e-05	0.0006609	3.19915
Bbs2	-1.50644	6.05559	-13.3799	4.15e-05	0.000723688	2.93629
Gm6872	-1.50639	7.91235	-15.4662	2.04e-05	0.000581652	3.71362
Dhrs3	-1.50625	8.79392	-10.1789	0.000156324	0.00128524	1.44631
Mrpl55	-1.5062	8.2992	-15.8865	1.79e-05	0.000570755	3.8558
Pstk	-1.50618	6.17941	-7.96468	0.000501485	0.00249526	0.110535
Rnf128	-1.50544	9.03831	-11.6746	8.06e-05	0.000936014	2.19549
Tdrkh	-1.50544	4.71672	-10.8002	0.000117516	0.0011056	1.77025
Zfp358	-1.50503	8.1423	-10.7634	0.00011947	0.00111399	1.75158
Mrpl35	-1.50492	8.80606	-14.81	2.52e-05	0.000603993	3.48248
Pgpep1	-1.50441	7.13329	-13.3429	4.21e-05	0.000725571	2.92134
Lactb2	-1.50436	7.96843	-10.3942	0.000141354	0.0012116	1.56075
Rnf146	-1.50434	6.63088	-7.54918	0.000644165	0.00295041	-0.178205
Pex19	-1.50408	9.47595	-14.8574	2.48e-05	0.000597053	3.49956
Filip1l	-1.50393	7.57602	-15.8759	1.79e-05	0.000570755	3.85228
Tbx5	-1.50359	7.97472	-9.49135	0.000218566	0.00151983	1.06405
Supt7l	-1.50359	6.99771	-15.5573	1.98e-05	0.000578471	3.74479
Cyp2j5	-1.50341	3.50076	-5.26619	0.00327477	0.00946824	-2.05751
Tmem106b	-1.50295	9.42017	-15.021	2.35e-05	0.000591947	3.55803
Prdx2	-1.50259	8.54306	-13.4598	4.03e-05	0.00071761	2.9685
Lgr6	-1.50239	7.42581	-12.0094	7.03e-05	0.000887404	2.34961
Tmem14a	-1.50227	4.40476	-11.3975	9.06e-05	0.000981055	2.06438
Pik3c2b	-1.50217	7.92874	-14.325	2.97e-05	0.000634123	3.30407
Gaa	-1.50185	9.46131	-15.2347	2.2e-05	0.000585508	3.63334
Tmem150a	-1.50161	8.15458	-12.0974	6.78e-05	0.000873971	2.38936
P2ry2	-1.50142	9.11314	-12.2073	6.49e-05	0.000853782	2.43859
Ifngr2	-1.50129	11.3912	-10.4804	0.000135847	0.00119304	1.60589
Mut	-1.50104	9.06328	-15.2818	2.16e-05	0.000583759	3.64981
Arhgef6	-1.50097	7.49658	-9.58798	0.000208235	0.00147802	1.11938
Dhtkd1	-1.50087	4.92621	-10.1318	0.00015985	0.00130044	1.42093
Slc16a9	-1.50065	6.65545	-13.5216	3.94e-05	0.000713302	2.99322
Hist3h2a	-1.49998	8.39971	-11.039	0.000105732	0.00105422	1.88981
Acvr2a	-1.49997	7.02823	-6.48618	0.00129548	0.0047816	-0.985575
Lrrc4b	-1.49957	8.08332	-10.835	0.000115707	0.00109628	1.78783
Akap5	-1.49953	5.05242	-15.7798	1.85e-05	0.000573976	3.82014
Pex2	-1.49896	6.34093	-12.3022	6.25e-05	0.00084575	2.48077
Pah	-1.49869	4.16877	-5.22031	0.00340152	0.00974454	-2.10134
Dusp19	-1.49868	7.01169	-8.61299	0.000346852	0.00198364	0.534758
Sclt1	-1.49835	3.99837	-15.3728	2.1e-05	0.000582741	3.6814
LOC100041877	-1.49815	4.67388	-9.38536	0.000230606	0.00156286	1.00273
Nudt9	-1.49792	8.18408	-13.5443	3.91e-05	0.000712962	3.00229
Ppp6r2	-1.49769	8.34028	-14.6719	2.64e-05	0.000614376	3.43234
5830417I10Rik	-1.49748	6.8474	-13.1976	4.44e-05	0.000746794	2.86208
Tmem82	-1.49702	5.85418	-13.4591	4.03e-05	0.00071761	2.96821
Pdgfrl	-1.497	4.93313	-9.23988	0.000248444	0.00163135	0.917471
AW549877	-1.49691	7.34343	-12.9932	4.79e-05	0.000771432	2.77754
Serpina6	-1.4969	3.89698	-6.11576	0.00169005	0.00580964	-1.29307
Mlycd	-1.49676	7.73218	-11.6221	8.24e-05	0.000941885	2.17089
Car14	-1.49652	8.26343	-10.3966	0.000141195	0.0012116	1.56204
B130024G19Rik	-1.49617	4.23826	-13.55	3.9e-05	0.000712962	3.00458
Gm1943	-1.49558	9.18751	-14.5574	2.75e-05	0.000620301	3.39039
Cbr4	-1.49544	8.8288	-15.9456	1.76e-05	0.000567615	3.87546
Eya1	-1.49501	4.83162	-10.7789	0.000118639	0.00111223	1.75949
2410024N13Rik	-1.495	3.0834	-5.02835	0.00399809	0.0109822	-2.28771
Fmo1	-1.49491	8.82217	-12.2834	6.3e-05	0.000846586	2.47243
3110052M02Rik	-1.49475	4.5811	-7.07815	0.000868346	0.00362175	-0.523077
Tcf4	-1.49439	9.30485	-15.408	2.08e-05	0.000582741	3.69356
Gdpgp1	-1.49348	6.66337	-11.3241	9.35e-05	0.000991519	2.02907
Cped1	-1.49325	8.46005	-11.0261	0.000106335	0.00105878	1.88338
Rgs5	-1.49276	9.91835	-15.5317	2e-05	0.000580081	3.73604
Slc25a35	-1.49186	6.34408	-11.797	7.66e-05	0.000924989	2.25233
Manea	-1.49159	8.01794	-12.357	6.12e-05	0.000841343	2.50491
Abl1	-1.49096	8.14951	-15.5812	1.97e-05	0.00057831	3.75294
Abcc4	-1.49049	6.59421	-8.83661	0.00030718	0.0018525	0.674221
Kcnn3	-1.49037	5.13167	-12.3065	6.24e-05	0.00084575	2.48264
Dcakd	-1.4903	7.74896	-15.3233	2.14e-05	0.000582741	3.66424
Htra1	-1.49028	8.25367	-9.41697	0.000226934	0.00155049	1.02109
Lace1	-1.48967	7.5036	-12.6335	5.49e-05	0.000815339	2.62521
Rdh19	-1.48955	4.30748	-8.20663	0.000435713	0.002284	0.272454
Clock	-1.48929	8.6595	-13.605	3.83e-05	0.000705507	3.02645
Chordc1	-1.48827	8.06427	-4.69885	0.00533235	0.0136421	-2.61932
Ppm1l	-1.48806	7.60992	-12.0941	6.79e-05	0.000874085	2.38789
Itga1	-1.48792	8.47073	-8.99545	0.000282259	0.00176117	0.771272
Narf	-1.48752	8.2211	-14.8791	2.47e-05	0.000596557	3.50735
Mrpl49	-1.48702	8.12669	-15.151	2.26e-05	0.000586199	3.60399
Hist1h2bc	-1.48647	10.4391	-7.18898	0.000808218	0.00344002	-0.440169
Ndufa2	-1.48613	9.77791	-15.7545	1.86e-05	0.000575525	3.81161
Lrrc28	-1.48585	5.89736	-9.00372	0.000281029	0.00175848	0.776279
9030612E09Rik	-1.48563	4.94868	-7.27616	0.000764361	0.00331556	-0.375726
Snn	-1.4856	5.61874	-12.6942	5.37e-05	0.000807896	2.65123
Gm25401	-1.48536	3.94337	-11.3078	9.41e-05	0.000993587	2.02123
Xrn1	-1.48516	7.28614	-15.1189	2.28e-05	0.000586199	3.59269
Dpy19l4	-1.48462	7.33288	-12.4027	6.01e-05	0.000838283	2.52499
Ttc28	-1.48437	6.88254	-14.9773	2.39e-05	0.000593582	3.54249
Plekhb1	-1.48425	4.79054	-14.936	2.42e-05	0.000593582	3.52774
Hspbp1	-1.48325	7.62906	-14.3183	2.98e-05	0.000635017	3.30156
Sike1	-1.48298	8.35089	-14.9957	2.37e-05	0.000592671	3.54904
Ptp4a3	-1.48277	10.1703	-15.8291	1.82e-05	0.000570822	3.83665
Ppp3cb	-1.48274	9.28815	-15.0071	2.37e-05	0.000592291	3.5531
Chac2	-1.4826	7.71615	-7.63508	0.00061108	0.00284946	-0.117364
Vamp1	-1.48228	5.83268	-6.86739	0.000997952	0.00398472	-0.683861
Slc25a26	-1.48221	7.18461	-15.723	1.88e-05	0.000575525	3.80101
Arfgef1	-1.4822	9.49731	-15.6876	1.9e-05	0.000575525	3.78906
Mapk9	-1.48119	8.19663	-13.7635	3.61e-05	0.000688647	3.08892
Rpa3	-1.48088	6.16659	-12.2157	6.47e-05	0.000853598	2.44235
Cxxc5	-1.48078	7.94885	-7.72775	0.000577622	0.00275024	-0.052413
Dach1	-1.48059	6.64839	-14.1414	3.17e-05	0.000651914	3.23479
Pogz	-1.47994	7.45827	-15.3004	2.15e-05	0.000582741	3.65628
Gpr52	-1.47978	4.42299	-11.1908	9.9e-05	0.00101739	1.9644
Gpc1	-1.47924	10.1156	-15.4869	2.03e-05	0.000581231	3.72071
Ago3	-1.47889	6.81918	-11.2083	9.82e-05	0.00101317	1.97293
Eif4e3	-1.47886	8.20734	-12.3999	6.02e-05	0.000838283	2.52378
Gm9939	-1.47865	4.66326	-13.8672	3.48e-05	0.000679362	3.12939
Ttc38	-1.47859	7.06536	-9.97608	0.000172189	0.00134811	1.33625
2700049A03Rik	-1.47854	5.91666	-15.1175	2.28e-05	0.000586199	3.59219
Vwa3a	-1.47813	5.03363	-13.0351	4.71e-05	0.000767679	2.79498
Smc6	-1.47744	7.44732	-13.9476	3.39e-05	0.000668105	3.16054
Hgd	-1.47676	4.32822	-6.20737	0.00158061	0.00552436	-1.21565
Gm10419	-1.4766	3.90148	-14.3025	2.99e-05	0.000637334	3.29564
Tmem42	-1.47637	6.99371	-12.7965	5.16e-05	0.000794734	2.6948
Cxx1b	-1.47585	8.77264	-13.3542	4.19e-05	0.000725158	2.92592
Mir505	-1.47574	6.12113	-14.7144	2.61e-05	0.000611527	3.44785
Pafah2	-1.47509	5.43121	-8.45173	0.000379267	0.00209538	0.432073
Rnf13	-1.47486	8.95973	-14.0361	3.28e-05	0.000661386	3.19456
Hist1h2bg	-1.47467	4.43655	-12.2559	6.37e-05	0.000850224	2.46024
Mmp11	-1.47375	5.97546	-8.73559	0.000324395	0.00190843	0.611635
Tmem135	-1.47321	7.65022	-8.5257	0.000363971	0.00204293	0.479396
Tbc1d22b	-1.47257	7.38525	-14.6316	2.68e-05	0.000616876	3.41765
Dph6	-1.47154	7.54553	-13.1988	4.44e-05	0.000746794	2.86259
Mrpl37	-1.47133	9.48625	-13.6493	3.77e-05	0.000702671	3.04397
C3	-1.47128	9.94456	-8.85965	0.000303408	0.00183953	0.688401
Adcy6	-1.47123	8.90567	-13.8215	3.54e-05	0.000683839	3.11161
Zfp229	-1.47069	4.76962	-10.666	0.000124823	0.00114289	1.70191
Fzd8	-1.47027	6.96791	-13.701	3.7e-05	0.000695984	3.06438
Vmn1r79	-1.46952	3.33234	-6.53341	0.00125342	0.00467102	-0.947399
Vps13d	-1.46949	7.17966	-13.3174	4.25e-05	0.000727741	2.91098
Smyd1	-1.46913	10.4969	-15.4936	2.02e-05	0.000581231	3.723
BC052040	-1.46847	6.90357	-12.9085	4.94e-05	0.000780843	2.74208
Klra10	-1.46844	3.50796	-10.1256	0.000160317	0.00130346	1.4176
Rad9b	-1.46792	4.28303	-8.54172	0.000360754	0.00203154	0.4896
2210408I21Rik	-1.46771	5.03758	-7.97332	0.000498941	0.00248983	0.116396
Akt3	-1.46722	9.01467	-13.1116	4.58e-05	0.000757508	2.82669
Ablim1	-1.46678	9.90679	-15.3576	2.11e-05	0.000582741	3.67612
BC002189	-1.4663	4.77948	-13.7182	3.67e-05	0.000693573	3.07117
Lrrc3b	-1.46629	7.50682	-12.4406	5.92e-05	0.000837019	2.54161
Rragb	-1.46537	3.74211	-12.0267	6.98e-05	0.000885076	2.35746
Zfp512	-1.46502	6.42178	-9.0451	0.000274967	0.00173581	0.801275
Gm15800	-1.46489	8.14289	-14.823	2.51e-05	0.000602097	3.48716
Zfp952	-1.46453	4.6907	-14.0219	3.3e-05	0.000662548	3.18911
Tango6	-1.4644	6.12639	-7.87672	0.000528275	0.0025886	0.0505556
Mrpl21	-1.46433	6.25571	-13.3821	4.15e-05	0.000723688	2.93721
Fxyd1	-1.46427	10.0095	-12.3915	6.03e-05	0.000838283	2.52009
Cxcl9	-1.46307	7.37158	-5.43304	0.0028582	0.00853193	-1.90042
Fut10	-1.4629	5.0685	-9.28163	0.000243161	0.00160998	0.942073
Lats2	-1.46235	8.07078	-15.6949	1.9e-05	0.000575525	3.79154
Trappc2	-1.46215	8.11202	-9.55036	0.000212186	0.00149307	1.09791
Gm24041	-1.46177	4.76148	-7.90226	0.000520323	0.002559	0.0680365
Lipo1	-1.46102	7.17866	-6.44424	0.00133423	0.00488638	-1.01966
Med16	-1.46079	8.28816	-14.7344	2.59e-05	0.000611527	3.45512
Cdh11	-1.46016	6.69677	-12.1061	6.76e-05	0.000872772	2.39329
Ddx3y	-1.46007	9.1376	-5.59565	0.00251079	0.00777396	-1.75071
Msh2	-1.45984	5.14959	-9.35634	0.00023404	0.00157482	0.985827
Fastkd1	-1.45949	7.55685	-10.7726	0.000118976	0.00111239	1.75627
Proser1	-1.45881	8.45929	-11.5887	8.36e-05	0.000947528	2.15517
Timm8b	-1.4587	10.5592	-15.3919	2.09e-05	0.000582741	3.68799
Tti1	-1.45866	8.4906	-15.1291	2.27e-05	0.000586199	3.5963
Lifr	-1.45837	7.93084	-11.2969	9.46e-05	0.000996158	2.01597
Gucy1b3	-1.45819	6.22891	-13.1958	4.44e-05	0.000746794	2.86134
Pigq	-1.45802	8.43616	-15.4956	2.02e-05	0.000581231	3.72369
Sirt5	-1.458	6.79492	-13.1446	4.53e-05	0.000754811	2.8403
Npepl1	-1.45773	8.68964	-10.9058	0.000112124	0.00107988	1.82343
Adam22	-1.45739	5.21026	-8.01377	0.000487237	0.00245588	0.143744
Fap	-1.45706	4.38204	-12.7511	5.25e-05	0.000798944	2.67551
Dmxl1	-1.45704	8.85028	-10.6029	0.000128444	0.00116037	1.66948
Cdkn2c	-1.45693	5.90943	-11.063	0.000104628	0.00105031	1.90167
Nexn	-1.45667	10.1783	-15.4826	2.03e-05	0.000581231	3.71924
Gin1	-1.45661	6.71131	-14.5203	2.78e-05	0.000622479	3.37672
Phactr1	-1.45647	5.2766	-10.6258	0.000127118	0.00115492	1.68125
Lpar6	-1.45636	6.89461	-12.0409	6.94e-05	0.000883473	2.3639
Nfe2l1	-1.45549	10.6157	-15.2909	2.16e-05	0.000583284	3.65297
Pgam2	-1.45513	10.1175	-13.7614	3.62e-05	0.000688647	3.0881
Gm23330	-1.45508	3.67777	-12.3949	6.03e-05	0.000838283	2.52157
Aqp11	-1.45506	5.08553	-9.33591	0.000236493	0.00158291	0.973897
Mlxipl	-1.45469	6.60158	-15.3708	2.1e-05	0.000582741	3.68069
0610040B10Rik	-1.45427	4.10741	-12.4863	5.82e-05	0.000834573	2.56153
Ulk2	-1.45427	8.31922	-15.3382	2.12e-05	0.000582741	3.66939
Ttc8	-1.45386	4.91148	-12.7694	5.21e-05	0.000797369	2.68332
Mtus2	-1.45381	7.24329	-12.2369	6.42e-05	0.000851032	2.4518
Prrg3	-1.4538	5.59272	-11.4608	8.82e-05	0.00097195	2.09459
Fcgrt	-1.45339	8.05178	-13.7966	3.57e-05	0.000685516	3.10186
Alkbh5	-1.4532	9.80342	-12.2805	6.31e-05	0.000846586	2.47116
Gm10069	-1.45274	5.39226	-11.7496	7.82e-05	0.000929062	2.23038
Gmps	-1.4526	8.61231	-14.4614	2.84e-05	0.000626848	3.35491
Fbln1	-1.45227	8.52738	-11.4983	8.68e-05	0.00096258	2.11242
Sort1	-1.45203	7.56698	-8.71112	0.000328736	0.00192554	0.596371
Gtf2i	-1.4519	9.76275	-15.5728	1.97e-05	0.000578471	3.75011
Maml2	-1.45166	6.65608	-14.4758	2.82e-05	0.000626721	3.36026
Pitpnc1	-1.451	8.37135	-10.5635	0.000130771	0.00117033	1.64911
Zc3h7b	-1.45069	8.60985	-14.7901	2.54e-05	0.00060511	3.47527
Pik3r3	-1.45065	6.67016	-15.4068	2.08e-05	0.000582741	3.69315
4833422C13Rik	-1.45004	4.59856	-6.64895	0.00115714	0.00441769	-0.854977
Ctso	-1.44982	6.91567	-9.11565	0.000264989	0.00169897	0.843634
Ranbp6	-1.44973	7.024	-12.9107	4.94e-05	0.000780843	2.74299
Olfr91	-1.44964	5.39209	-7.32674	0.000740211	0.00324472	-0.338647
Dnajc19	-1.44962	6.65097	-15.2004	2.22e-05	0.000586199	3.62134
Phb	-1.44936	10.3581	-11.6392	8.18e-05	0.000941073	2.17892
Rtp3	-1.44928	5.73105	-11.8399	7.53e-05	0.00091896	2.27212
Clcn1	-1.44893	4.68626	-12.369	6.09e-05	0.000840911	2.5102
Nfatc2	-1.4488	6.37528	-11.4519	8.85e-05	0.000971961	2.09037
Stat5b	-1.44869	8.22833	-10.6338	0.000126657	0.00115255	1.68537
Tbx3	-1.44806	7.20822	-11.7166	7.92e-05	0.000930215	2.21505
Pdk2	-1.44751	10.9522	-13.6904	3.71e-05	0.000697001	3.0602
Commd3	-1.44687	9.69837	-15.0677	2.32e-05	0.000588192	3.57462
Mettl7a1	-1.44673	7.73904	-15.087	2.3e-05	0.000586286	3.58143
Sgpp1	-1.44664	8.04662	-15.1022	2.29e-05	0.000586199	3.5868
Snai2	-1.44658	6.42797	-13.5159	3.95e-05	0.000713302	2.99094
Kif11	-1.4463	4.14547	-12.6015	5.56e-05	0.000820172	2.61143
Rsrp1	-1.44594	8.85836	-3.32397	0.0208933	0.0400377	-4.17512
Tmem184b	-1.44588	8.97277	-10.9193	0.000111453	0.0010783	1.83022
Retsat	-1.44517	8.23162	-13.662	3.75e-05	0.000700852	3.04899
Adamts3	-1.44422	5.19473	-14.5768	2.73e-05	0.000619523	3.39755
Fam110b	-1.44413	5.28413	-10.2811	0.000148997	0.00124966	1.50091
Pter	-1.44411	6.54993	-12.3847	6.05e-05	0.000838733	2.5171
Ppa2	-1.44395	8.50504	-15.3465	2.12e-05	0.000582741	3.67229
Tsc22d3	-1.44371	8.24398	-13.6201	3.8e-05	0.000705464	3.03242
Nek1	-1.44359	6.54106	-9.33647	0.000236425	0.00158291	0.974226
Phka2	-1.44215	7.18471	-9.80517	0.000187064	0.00139891	1.24178
Kcnmb1	-1.44196	6.03353	-8.91617	0.000294384	0.0018093	0.723036
Setd8	-1.44189	10.2071	-15.1449	2.26e-05	0.000586199	3.60185
Sepp1	-1.44144	10.0687	-10.7675	0.00011925	0.00111306	1.75366
Anks1	-1.44137	8.00798	-12.7137	5.33e-05	0.000804895	2.65957
Mybpc2	-1.44112	6.80092	-14.8784	2.47e-05	0.000596557	3.50712
Dbt	-1.44085	9.4771	-13.0867	4.62e-05	0.000758714	2.81638
Fig4	-1.44077	8.28558	-10.9512	0.000109894	0.00107006	1.84616
Mtmr9	-1.44062	7.03458	-11.7084	7.95e-05	0.000930215	2.21124
Ice1	-1.44012	7.68319	-12.3412	6.16e-05	0.000842852	2.49798
Cenpn	-1.44006	4.77505	-13.2372	4.37e-05	0.000742167	2.87829
Plp1	-1.43981	5.98987	-13.507	3.96e-05	0.000713302	2.98741
Mfsd6	-1.43957	7.38028	-13.6063	3.82e-05	0.000705507	3.02695
Vti1a	-1.43919	6.27417	-9.25649	0.000246326	0.0016254	0.927273
Prpsap1	-1.43828	7.04129	-14.1007	3.21e-05	0.000653948	3.21929
Tubgcp4	-1.43776	7.78976	-10.7772	0.000118729	0.00111223	1.75862
Cyp2d22	-1.43774	8.06455	-15.1357	2.27e-05	0.000586199	3.59863
Gm10658	-1.43761	4.20629	-8.97496	0.000285335	0.00177487	0.758842
Runx1t1	-1.43757	5.8092	-10.6667	0.000124783	0.00114289	1.70226
Kbtbd3	-1.43749	4.9777	-7.74782	0.000570665	0.00272624	-0.038437
4930566D17Rik	-1.43745	5.94584	-5.09123	0.00379011	0.0105583	-2.22612
Mrpl50	-1.4373	9.29784	-10.8479	0.00011504	0.00109358	1.79436
Fbxw7	-1.43698	5.08838	-12.2399	6.41e-05	0.000850483	2.45313
Ift122	-1.43688	5.1895	-14.8	2.53e-05	0.000604278	3.47886
Plcb4	-1.43659	8.80823	-14.4624	2.84e-05	0.000626848	3.35531
Gm10210	-1.43651	3.88685	-10.5404	0.00013216	0.00117612	1.63712
n-R5-8s1	-1.43611	4.71024	-10.4301	0.000139029	0.00120609	1.5796
Gm13233	-1.43609	8.34215	-10.9438	0.000110253	0.00107312	1.84247
Cep57	-1.43598	5.68999	-15.3977	2.08e-05	0.000582741	3.69001
Macf1	-1.43591	9.0177	-11.66	8.11e-05	0.000938096	2.18866
Stard7	-1.43555	9.01961	-12.3999	6.02e-05	0.000838283	2.52376
Slc30a9	-1.43518	9.08664	-14.442	2.86e-05	0.000627028	3.34772
Sptb	-1.43366	8.42136	-13.5895	3.85e-05	0.000707567	3.02028
Mapk14	-1.4333	8.51962	-11.8299	7.56e-05	0.00091896	2.26754
Dtx3l	-1.43315	7.34956	-8.45047	0.000379534	0.00209623	0.431264
Scai	-1.43279	5.32218	-13.188	4.45e-05	0.000747912	2.85815
Angptl3	-1.43251	4.72533	-11.5843	8.37e-05	0.000948396	2.15309
Gm9994	-1.43221	4.10119	-5.82436	0.0021025	0.00678614	-1.54558
4632415L05Rik	-1.43191	5.66848	-9.61244	0.000205713	0.00146963	1.1333
Ckap5	-1.43185	8.0641	-15.3133	2.14e-05	0.000582741	3.66075
Gm5532	-1.43175	8.89535	-14.134	3.17e-05	0.000652557	3.23197
Atpaf2	-1.43144	7.49392	-14.4459	2.85e-05	0.000627019	3.34918
Coq5	-1.43085	9.95195	-14.7263	2.6e-05	0.000611527	3.45217
Fhl2	-1.43042	11.3523	-15.056	2.33e-05	0.000589218	3.57046
Sorbs1	-1.42962	10.0263	-13.3608	4.18e-05	0.000724915	2.92856
Sesn3	-1.42951	6.96768	-14.3457	2.95e-05	0.000634123	3.31183
Slc1a3	-1.42908	4.53446	-12.6683	5.42e-05	0.00081144	2.64016
Nbas	-1.42883	6.76318	-13.7912	3.58e-05	0.000685695	3.09977
Mirlet7c-1	-1.42881	3.84589	-10.6123	0.000127898	0.00115778	1.67431
Trappc5	-1.42821	7.58351	-14.2743	3.02e-05	0.000638539	3.28506
Camta2	-1.42813	7.92873	-12.8556	5.05e-05	0.00078628	2.71979
Abcb8	-1.42769	7.38879	-14.3099	2.99e-05	0.000636278	3.29842
Zim1	-1.42764	5.13874	-9.36929	0.0002325	0.00156926	0.99338
Pcnx	-1.42695	8.02468	-14.3784	2.92e-05	0.000632698	3.32405
Mtrf1l	-1.42695	5.8268	-5.79664	0.00214759	0.0069011	-1.57011
Actl6a	-1.42678	8.8051	-11.6855	8.03e-05	0.000934945	2.20054
Dut	-1.42657	6.18672	-8.54447	0.000360205	0.00203134	0.49135
Gm6086	-1.42566	6.2087	-14.208	3.09e-05	0.000644763	3.26004
Gja1	-1.42534	11.0093	-11.317	9.37e-05	0.000992296	2.02566
Sgcd	-1.42533	8.94136	-15.2973	2.15e-05	0.000582741	3.65519
Fam20b	-1.42525	9.06314	-14.9398	2.42e-05	0.000593582	3.52911
Tia1	-1.42518	6.32362	-9.72752	0.000194325	0.00142016	1.19833
Mtf2	-1.42513	6.70496	-10.0796	0.000163867	0.00132082	1.39267
Ptprb	-1.42487	9.24543	-14.2853	3.01e-05	0.000637739	3.28918
Isca2	-1.42447	7.9247	-14.7264	2.6e-05	0.000611527	3.45221
Msrb2	-1.42431	7.71126	-14.9936	2.38e-05	0.000592671	3.54831
Chl1	-1.42296	3.90131	-10.9839	0.000108321	0.00106407	1.86246
Ipo11	-1.42249	7.92905	-14.9381	2.42e-05	0.000593582	3.52851
Rgs2	-1.42238	7.42742	-12.0231	6.99e-05	0.000885905	2.35582
Abat	-1.42217	7.16687	-7.87988	0.000527283	0.00258591	0.0527217
BC026585	-1.42202	6.70607	-15.1547	2.25e-05	0.000586199	3.60531
Plekhh2	-1.42188	5.99205	-12.1275	6.7e-05	0.000868542	2.40292
Thrsp	-1.42188	6.81207	-7.89437	0.000522764	0.00256839	0.0626432
Rel	-1.42175	8.63405	-12.9229	4.92e-05	0.000779849	2.74812
Col15a1	-1.42175	7.58789	-7.08735	0.000863158	0.00361097	-0.516153
Sar1b	-1.42168	10.8512	-14.7192	2.6e-05	0.000611527	3.44958
Add3	-1.42135	8.22249	-15.0866	2.3e-05	0.000586286	3.5813
Slc9a3r2	-1.42027	8.93623	-13.8191	3.54e-05	0.000683839	3.11067
Btbd8	-1.42024	3.90646	-8.70762	0.000329362	0.00192781	0.594186
Zfp612	-1.42014	6.43017	-11.5347	8.55e-05	0.000958882	2.1297
Kiz	-1.42002	6.81046	-15.2343	2.2e-05	0.000585508	3.63321
Cdkl5	-1.41987	6.49876	-14.533	2.77e-05	0.000621059	3.3814
Pnet-ps	-1.41913	4.52084	-10.7992	0.00011757	0.00110562	1.76973
Pygm	-1.41884	11.9712	-15.0865	2.3e-05	0.000586286	3.58124
Cep104	-1.41828	7.3025	-12.6239	5.51e-05	0.000816627	2.62108
Oxnad1	-1.41821	8.03989	-14.2279	3.07e-05	0.000643134	3.26755
Clpb	-1.41802	7.04362	-12.583	5.6e-05	0.000822328	2.60345
Ttc7b	-1.41772	9.43372	-12.9523	4.86e-05	0.000776331	2.76045
Ccdc159	-1.41742	6.03686	-14.4208	2.88e-05	0.000628869	3.33983
Mettl11b	-1.41612	4.16843	-9.84597	0.000183378	0.00138749	1.26448
Asap3	-1.41567	6.58192	-8.96323	0.000287114	0.00178197	0.751717
Churc1	-1.41463	9.67147	-14.3265	2.97e-05	0.000634123	3.30465
Mob3b	-1.41445	4.80051	-9.14251	0.000261303	0.00168319	0.859678
Asah2	-1.41385	7.65038	-13.2026	4.43e-05	0.000746794	2.86414
Rnf150	-1.41367	6.68219	-7.60993	0.000620554	0.00287654	-0.135115
Mtus1	-1.41342	8.24699	-14.9581	2.4e-05	0.000593582	3.53563
Megf9	-1.41302	7.1102	-13.7327	3.65e-05	0.00069123	3.07685
Fbxl22	-1.41288	6.66502	-14.574	2.73e-05	0.000619523	3.3965
Pfn4	-1.4126	5.33848	-11.2442	9.67e-05	0.00100488	1.99041
L3hypdh	-1.41232	4.81051	-15.1166	2.28e-05	0.000586199	3.59188
Fbxl7	-1.41199	5.3819	-9.02271	0.000278228	0.00174864	0.787761
Clec11a	-1.41183	4.68929	-15.1745	2.24e-05	0.000586199	3.61228
Enpep	-1.41127	6.48996	-13.3571	4.19e-05	0.000724915	2.92708
Sdhaf2	-1.41092	8.38607	-13.8103	3.56e-05	0.000684435	3.10721
Gm15403	-1.41027	3.7169	-14.4899	2.81e-05	0.000626032	3.36549
Xkrx	-1.41023	4.38304	-9.76846	0.000190456	0.00140819	1.22128
Med12l	-1.41017	6.22829	-11.4691	8.79e-05	0.000970902	2.09858
Bmpr2	-1.41008	10.495	-12.2753	6.32e-05	0.000846673	2.46885
Celsr1	-1.40958	5.89635	-12.1956	6.52e-05	0.000856689	2.4334
Ssc5d	-1.40897	6.27305	-9.10332	0.000266701	0.00170589	0.836253
C1rb	-1.40888	6.78803	-12.7802	5.19e-05	0.000796118	2.68789
Tm9sf2	-1.40877	9.56864	-14.4972	2.8e-05	0.000626032	3.36817
Aox1	-1.40877	7.00323	-8.49298	0.000370644	0.00206457	0.458512
Sh3gl2	-1.40874	5.1617	-6.38984	0.00138655	0.00502094	-1.06414
Cd81	-1.40857	11.4786	-13.238	4.37e-05	0.000742167	2.87865
St6galnac3	-1.40854	5.16074	-10.7773	0.000118725	0.00111223	1.75866
Pgap1	-1.40756	4.74137	-11.4218	8.97e-05	0.000975754	2.07598
Gabrb3	-1.4075	4.89397	-13.9733	3.36e-05	0.000664658	3.17044
Lyrm5	-1.40741	7.32918	-7.81337	0.000548622	0.00265221	0.00698689
Gm27037	-1.40688	4.41731	-13.9901	3.34e-05	0.000663401	3.17689
Slc10a1	-1.40662	4.08074	-3.67988	0.0142763	0.0295201	-3.74504
Cog4	-1.40468	8.21751	-13.124	4.56e-05	0.000755911	2.83182
Tceal3	-1.40465	4.08866	-11.0088	0.000107145	0.00106145	1.8748
Klhdc10	-1.40452	8.1268	-14.0763	3.24e-05	0.000657579	3.20997
Zfp706	-1.40413	10.2125	-11.4328	8.92e-05	0.00097439	2.08124
Fbxo22	-1.40413	9.11427	-14.9492	2.41e-05	0.000593582	3.53245
Hrc	-1.40389	10.8305	-14.9539	2.41e-05	0.000593582	3.53416
Tbc1d30	-1.40376	4.32668	-13.8169	3.55e-05	0.000683839	3.10981
Grhpr	-1.40304	8.52794	-14.7212	2.6e-05	0.000611527	3.4503
Adamtsl3	-1.40299	4.98306	-5.6769	0.00235589	0.00740673	-1.67712
Nudt13	-1.40291	6.8661	-13.5885	3.85e-05	0.000707567	3.01987
Fmo2	-1.40289	7.75796	-12.4267	5.95e-05	0.000837958	2.53551
Wdr7	-1.40255	7.57141	-14.4873	2.81e-05	0.000626032	3.36452
Slc25a44	-1.40235	7.77286	-10.5924	0.00012906	0.00116331	1.66405
Fam102a	-1.40229	7.01531	-8.50197	0.000368797	0.00205937	0.464254
Rcbtb2	-1.40227	6.56604	-9.92893	0.000176148	0.00135783	1.31035
E2f6	-1.40218	8.6863	-9.02496	0.000277898	0.00174793	0.789122
Kansl1l	-1.40147	6.86604	-11.3257	9.34e-05	0.000991519	2.02986
Jtb	-1.40122	8.63779	-10.7023	0.000122793	0.00113319	1.72049
Aplp2	-1.40117	10.7595	-13.6938	3.71e-05	0.000696682	3.06156
B3gnt1	-1.40099	7.67698	-14.1101	3.2e-05	0.000653601	3.22287
Gatsl2	-1.40077	6.16615	-14.1215	3.19e-05	0.000653105	3.2272
C1qtnf1	-1.40056	6.60108	-10.0748	0.00016424	0.0013225	1.39009
Cmtm2b	-1.40032	3.41068	-8.26718	0.00042089	0.0022388	0.31229
Csrp2	-1.4	7.53277	-5.32632	0.00311695	0.00912573	-2.00049
Pot1a	-1.39992	6.8329	-11.4641	8.81e-05	0.000971537	2.09616
Bcl7a	-1.39977	7.10436	-14.7268	2.59e-05	0.000611527	3.45233
Mgat3	-1.39956	4.76887	-7.88026	0.000527162	0.00258591	0.0529853
Glrx2	-1.3979	9.59223	-14.9282	2.43e-05	0.000593895	3.52497
Gm10293	-1.39675	8.54735	-8.42869	0.000384189	0.00211374	0.417247
Tubg2	-1.3967	6.58326	-13.1799	4.47e-05	0.000749112	2.85483
Cdh13	-1.39668	9.67703	-13.5245	3.94e-05	0.000713302	2.99439
Acp6	-1.39626	7.4326	-9.42442	0.000226079	0.00154751	1.02541
Gm4956	-1.39604	3.95514	-9.98346	0.00017158	0.00134709	1.34029
Pex11b	-1.39557	7.61051	-12.9801	4.81e-05	0.000771817	2.77207
Slc44a1	-1.39532	8.1341	-11.3038	9.43e-05	0.000994847	2.01931
Clpsl2	-1.39478	4.19163	-9.52902	0.000214467	0.00150179	1.08569
Cyp27a1	-1.39412	6.96235	-14.5433	2.76e-05	0.000621059	3.38521
Cox20	-1.39377	9.0296	-13.0407	4.71e-05	0.000767432	2.7973
Zfp106	-1.39314	10.7288	-13.608	3.82e-05	0.000705507	3.02761
Tex261	-1.39293	9.21576	-14.4757	2.82e-05	0.000626721	3.36023
Slc28a2	-1.39249	6.40225	-12.1004	6.77e-05	0.000873424	2.39073
Khdrbs3	-1.39219	8.32353	-14.5966	2.71e-05	0.000618697	3.4048
Ccrl2	-1.39211	6.68922	-14.5703	2.73e-05	0.000619523	3.39514
Ska2	-1.39192	8.16364	-14.6828	2.63e-05	0.000614376	3.43634
Mki67	-1.39156	4.80604	-8.27843	0.000418203	0.00223432	0.319661
Fam73a	-1.39154	7.34084	-8.71033	0.000328877	0.0019259	0.595879
Dnajc14	-1.39139	8.35018	-10.8104	0.000116982	0.00110312	1.77542
Efna2	-1.39139	5.1091	-10.5497	0.000131598	0.0011729	1.64195
Cgrrf1	-1.39109	6.67531	-10.9544	0.000109738	0.00106983	1.84777
Asb18	-1.39099	6.75081	-12.5434	5.69e-05	0.000826725	2.58632
C1qtnf2	-1.39083	4.95716	-13.8316	3.53e-05	0.000683701	3.11554
Retnla	-1.39067	4.03615	-8.26054	0.000422486	0.00224429	0.307933
Dlc1	-1.39054	7.83534	-12.5303	5.72e-05	0.000829749	2.58064
Polr2m	-1.39041	9.89704	-14.1083	3.2e-05	0.000653601	3.22216
Dhfr	-1.38981	4.74742	-11.6345	8.2e-05	0.000941073	2.17672
Filip1	-1.38966	8.2215	-10.8047	0.000117281	0.00110422	1.77252
Med29	-1.38933	7.51951	-10.8503	0.00011492	0.00109348	1.79555
Ankrd32	-1.38929	5.51789	-11.5436	8.52e-05	0.000955774	2.13388
Rbm38	-1.38929	9.67293	-11.1326	0.000101504	0.00103174	1.93593
Epas1	-1.38789	10.9295	-14.1696	3.13e-05	0.000649996	3.24549
Pnrc2	-1.38788	9.60999	-13.1341	4.54e-05	0.000755329	2.83599
Lrrn4cl	-1.38786	5.15709	-7.85365	0.000535577	0.00260962	0.0347307
Cdk7	-1.38775	6.06519	-10.7335	0.00012108	0.00112252	1.73641
Dpp8	-1.38769	9.15786	-14.7192	2.6e-05	0.000611527	3.44957
Irak1bp1	-1.38683	5.15657	-12.0787	6.83e-05	0.000874984	2.38093
Scrn3	-1.38646	7.9632	-14.511	2.79e-05	0.00062386	3.37328
Pitpnm2	-1.38574	8.20264	-10.4488	0.000137832	0.00120156	1.58942
Aes	-1.38544	11.2227	-14.0897	3.22e-05	0.00065591	3.21508
3110040N11Rik	-1.38543	6.25869	-8.00437	0.000489928	0.00246319	0.137399
Celsr2	-1.38523	5.66441	-12.4948	5.8e-05	0.000834573	2.56521
St6galnac2	-1.38504	6.92538	-14.8667	2.48e-05	0.000596994	3.50292
Gm24706	-1.38464	3.49397	-14.4292	2.87e-05	0.000628869	3.34296
Slmap	-1.3845	8.83998	-13.6794	3.72e-05	0.000698413	3.05585
Tmed4	-1.3842	9.78472	-14.4174	2.88e-05	0.000628869	3.33857
Fam160a1	-1.384	7.90386	-14.4447	2.85e-05	0.000627019	3.34872
Rcor3	-1.3838	8.07619	-11.9367	7.24e-05	0.000900065	2.31652
R74862	-1.38364	4.63229	-7.45176	0.000684294	0.00306741	-0.247956
Prkca	-1.38362	7.82487	-9.0138	0.000279538	0.00175367	0.782376
Btbd11	-1.38361	5.19599	-10.6159	0.000127692	0.00115778	1.67613
Dctn5	-1.38359	8.44635	-14.2462	3.05e-05	0.000640954	3.27446
Mrps31	-1.38358	7.36314	-9.83385	0.000184464	0.00139006	1.25775
Trappc1	-1.3828	8.73125	-13.5342	3.92e-05	0.000713302	2.99825
Colq	-1.38245	6.23709	-8.28039	0.000417736	0.00223232	0.320947
Arap2	-1.38204	6.51226	-11.2346	9.71e-05	0.00100647	1.98573
Kank2	-1.38078	8.03804	-14.1223	3.19e-05	0.000653105	3.22751
Tmem116	-1.3801	5.58745	-10.1173	0.000160956	0.00130602	1.41308
Abhd4	-1.3796	8.11061	-12.9764	4.82e-05	0.000771866	2.77053
Pacs1	-1.37951	8.24784	-14.3973	2.9e-05	0.000632034	3.3311
Slc25a36	-1.37947	8.55545	-11.8284	7.57e-05	0.000919054	2.26686
Apol10b	-1.37926	4.15073	-11.725	7.9e-05	0.000930131	2.21898
Apba1	-1.37866	5.38709	-14.6098	2.7e-05	0.000617117	3.40966
BC067074	-1.37864	4.8125	-7.90323	0.000520023	0.00255856	0.0687017
Gas1	-1.37818	7.57388	-14.274	3.02e-05	0.000638539	3.28493
Cacnb2	-1.37777	9.77641	-13.9954	3.33e-05	0.000663338	3.17894
Crtam	-1.37774	3.84173	-14.5988	2.71e-05	0.000618697	3.40561
Erap1	-1.37725	6.78569	-8.34146	0.000403516	0.00218521	0.360796
Serpinf2	-1.37671	5.11591	-11.5472	8.5e-05	0.00095521	2.13558
Unc45b	-1.37605	8.99115	-13.0871	4.62e-05	0.000758714	2.81655
Fra10ac1	-1.37562	5.81705	-12.2968	6.26e-05	0.00084588	2.47838
Gstm2	-1.37528	9.42036	-11.5274	8.57e-05	0.000959617	2.12623
4932438A13Rik	-1.37516	8.17536	-13.0889	4.62e-05	0.000758714	2.81731
Lancl1	-1.37456	7.45773	-11.1723	9.98e-05	0.0010212	1.95539
Arntl	-1.37436	6.87625	-12.6032	5.56e-05	0.000820172	2.61215
Tagln	-1.37434	6.76469	-4.08789	0.00945154	0.0213279	-3.27555
Gm9359	-1.37411	6.49921	-9.8618	0.000181972	0.00138214	1.27326
Fads2	-1.37407	7.36376	-7.56104	0.000639474	0.00293612	-0.169769
Gbp7	-1.37404	7.27922	-3.90509	0.0113343	0.0246602	-3.48275
Pddc1	-1.37342	7.37175	-11.3522	9.23e-05	0.000990488	2.04265
Agpat1	-1.37317	8.29087	-12.8995	4.96e-05	0.000780843	2.73832
Sccpdh	-1.37298	8.14418	-11.7843	7.7e-05	0.000927057	2.2465
Kdelc2	-1.37294	6.04211	-8.68196	0.000333998	0.00194484	0.578135
Rp9	-1.3721	7.58766	-12.2496	6.38e-05	0.000850301	2.45746
Nagk	-1.37192	7.45978	-8.67758	0.000334797	0.00194774	0.57539
Cbx7	-1.37152	7.13748	-12.992	4.79e-05	0.000771432	2.77705
Tjp1	-1.37137	8.54281	-13.4941	3.98e-05	0.000715231	2.98225
Cep78	-1.37103	5.73918	-9.44579	0.000223647	0.00153826	1.03778
Ppm1d	-1.37102	7.79283	-10.4122	0.000140185	0.00121015	1.57019
Slc24a2	-1.37088	4.23463	-8.0241	0.000484299	0.00245131	0.150711
Gfm2	-1.37087	7.78625	-14.2114	3.09e-05	0.000644763	3.26132
Fsd1l	-1.36999	7.30243	-11.7583	7.79e-05	0.000929062	2.23441
Gpr137b	-1.36974	5.74124	-4.53405	0.00619109	0.0153066	-2.79093
Obsl1	-1.36897	7.4349	-12.9209	4.92e-05	0.000779924	2.74728
Phospho2	-1.36897	6.90606	-5.92084	0.00195402	0.00645217	-1.4609
Ghrhr	-1.36844	5.11482	-14.4557	2.84e-05	0.000626848	3.3528
Srd5a1	-1.3682	4.41929	-7.96395	0.000501701	0.0024953	0.110039
Pamr1	-1.36804	5.0268	-7.95299	0.000504952	0.00250427	0.102596
Rab21	-1.368	10.085	-9.93648	0.000175506	0.00135616	1.3145
Casq2	-1.3678	11.2755	-14.5712	2.73e-05	0.000619523	3.39547
Cbx5	-1.36749	8.28032	-13.2625	4.33e-05	0.000737144	2.88865
Gm24418	-1.36735	3.50937	-8.93642	0.00029123	0.00179763	0.735393
Kbtbd12	-1.3669	5.77962	-12.2737	6.32e-05	0.000846673	2.46814
Ap1ar	-1.36679	8.62382	-11.7357	7.86e-05	0.000929469	2.22393
Clip4	-1.36577	10.1644	-14.1054	3.21e-05	0.000653601	3.22106
Cyp2a12	-1.36573	3.54186	-4.61145	0.00576919	0.01449	-2.70984
Speg	-1.3652	8.44517	-12.7012	5.35e-05	0.000807751	2.65424
Tarsl2	-1.365	7.32011	-13.4893	3.99e-05	0.000715437	2.9803
Ncapd3	-1.36479	6.7364	-13.3902	4.13e-05	0.000723688	2.94047
Mrpl45	-1.3644	7.37916	-11.0021	0.000107461	0.00106302	1.87148
Ube2d2a	-1.36402	8.76203	-14.0192	3.3e-05	0.000662548	3.1881
Scara3	-1.3639	5.30105	-10.7599	0.000119654	0.00111399	1.74983
Ndufs5	-1.36385	8.18292	-11.083	0.00010372	0.0010444	1.91153
Bzw2	-1.36369	10.0313	-13.4679	4.02e-05	0.00071761	2.97172
Eml6	-1.36364	5.59627	-12.4625	5.87e-05	0.000834829	2.55116
Rfx3	-1.36358	4.38339	-6.95471	0.000941655	0.00383203	-0.616743
Tspan6	-1.36326	6.84589	-9.06877	0.000271571	0.00172473	0.815517
Tmem206	-1.36324	6.24994	-10.1771	0.000156462	0.00128554	1.44531
Rab40c	-1.36316	7.01263	-14.0029	3.32e-05	0.000663221	3.18184
Gna12	-1.36304	10.6071	-14.5572	2.75e-05	0.000620301	3.39031
Agl	-1.36301	9.68119	-14.2952	3e-05	0.000637739	3.29289
Pi16	-1.36296	6.32265	-10.537	0.000132367	0.0011771	1.63534
Gm10516	-1.36287	4.15049	-8.50901	0.000367357	0.0020543	0.468752
Ralgps2	-1.36272	5.2605	-14.2011	3.1e-05	0.00064575	3.25742
Prkcq	-1.36249	5.60457	-9.9433	0.00017493	0.00135616	1.31825
Scara5	-1.36225	6.00784	-11.5515	8.49e-05	0.0009547	2.13763
Ccdc34	-1.36213	4.21206	-14.0558	3.26e-05	0.000660259	3.20213
Snx27	-1.36167	8.00796	-14.2425	3.06e-05	0.000641023	3.27305
Slc12a6	-1.36162	7.63659	-13.0137	4.75e-05	0.000768692	2.78607
Thtpa	-1.36142	6.06177	-10.0341	0.000167464	0.00133625	1.36795
8430419L09Rik	-1.36119	6.13414	-7.54116	0.000647361	0.00295774	-0.183916
Pcbd1	-1.36057	5.9015	-8.19074	0.000439704	0.00229895	0.261957
Gm6226	-1.36057	7.11976	-6.2647	0.00151638	0.0053544	-1.16767
Cyp2a5	-1.3604	3.56729	-6.6368	0.00116685	0.00444423	-0.864638
Gm14305	-1.36032	8.07797	-14.3387	2.96e-05	0.000634123	3.30919
Pcm1	-1.35986	8.65557	-12.334	6.17e-05	0.000843913	2.4948
Mlec	-1.35914	8.50745	-11.2623	9.6e-05	0.00100052	1.9992
Sntb1	-1.35891	6.77033	-11.6752	8.06e-05	0.000936014	2.19575
Serinc5	-1.35854	7.57254	-9.4238	0.00022615	0.00154755	1.02505
Tsc1	-1.35789	7.47731	-9.84969	0.000183047	0.00138685	1.26654
Aff3	-1.35788	4.60929	-12.2402	6.41e-05	0.000850483	2.45327
Tecrl	-1.35757	10.5503	-12.4303	5.94e-05	0.000837958	2.53708
Wwp1	-1.35702	9.57884	-13.0318	4.72e-05	0.000767679	2.7936
Uros	-1.35695	6.478	-7.07383	0.00087079	0.00362972	-0.526325
Zhx2	-1.35671	7.5174	-13.3439	4.21e-05	0.000725571	2.92173
Stradb	-1.35601	8.75161	-13.0944	4.61e-05	0.000758378	2.81956
Nit1	-1.3558	8.0341	-9.07078	0.000271284	0.00172335	0.81673
Cenpv	-1.35575	8.2851	-14.4586	2.84e-05	0.000626848	3.35388
Zfhx3	-1.35573	7.19202	-13.5778	3.86e-05	0.000709237	3.01562
Cyp51	-1.35571	5.64366	-12.6181	5.53e-05	0.000817184	2.61859
Erbb3	-1.35516	6.35816	-11.086	0.000103583	0.00104408	1.91302
Alkbh7	-1.35515	7.19841	-12.9552	4.86e-05	0.000775987	2.76167
Aasdh	-1.35486	5.64818	-8.12956	0.000455486	0.00235126	0.221356
Igdcc4	-1.35455	5.73258	-9.58621	0.000208419	0.00147806	1.11837
Lekr1	-1.35416	4.47017	-14.0119	3.31e-05	0.000662548	3.18527
Rprd1a	-1.35395	7.83931	-12.5924	5.58e-05	0.000820345	2.6075
Dcaf6	-1.35384	8.54126	-11.3473	9.25e-05	0.000991098	2.04026
Tfrc	-1.35372	8.20645	-3.98428	0.0104701	0.0231598	-3.39236
Il17d	-1.35358	6.07601	-13.5563	3.89e-05	0.000712559	3.00708
C8b	-1.35207	4.24808	-4.87466	0.00456505	0.0121263	-2.44051
Mgea5	-1.35194	8.03869	-12.7882	5.18e-05	0.000795421	2.69131
Ppp1r9a	-1.35188	5.35827	-11.9416	7.22e-05	0.000898789	2.31876
Crebl2	-1.3517	7.33668	-10.7753	0.000118832	0.00111239	1.75764
Grsf1	-1.35146	10.2479	-14.2453	3.05e-05	0.000640954	3.27412
Qk	-1.3514	11.6757	-12.9029	4.96e-05	0.000780843	2.73972
Slc25a23	-1.35112	7.98677	-6.82416	0.00102729	0.00407096	-0.717354
Rtn1	-1.351	5.01232	-12.1484	6.65e-05	0.000865952	2.41228
Cby1	-1.35061	6.44251	-10.6124	0.000127894	0.00115778	1.67434
Fam49a	-1.35059	6.60437	-6.95013	0.000944508	0.00384041	-0.620239
Adipor1	-1.35039	10.2217	-14.4642	2.83e-05	0.000626848	3.35597
Pcolce	-1.35032	8.94268	-7.88274	0.000526385	0.00258303	0.0546861
Akt1	-1.35023	10.0552	-14.3414	2.96e-05	0.000634123	3.31021
Tfb2m	-1.34996	9.71473	-11.6834	8.03e-05	0.000934945	2.19957
Trim13	-1.34972	7.97678	-12.4238	5.96e-05	0.000838283	2.53424
Olfr1033	-1.34972	4.07307	-12.0367	6.95e-05	0.000883473	2.36195
Dcun1d1	-1.34972	7.48996	-9.11186	0.000265513	0.00170054	0.841367
Bmpr1a	-1.34955	9.54548	-14.2529	3.05e-05	0.000640881	3.27696
Ppp3ca	-1.34907	9.04891	-13.4104	4.1e-05	0.000723688	2.9486
Rarres2	-1.34894	7.21985	-9.98885	0.000171136	0.00134666	1.34324
Btbd2	-1.3487	8.42498	-13.4408	4.06e-05	0.000720121	2.96086
5033430I15Rik	-1.34801	5.23534	-10.778	0.00011869	0.00111223	1.759
Hexim2	-1.34763	5.46455	-12.0012	7.05e-05	0.000887741	2.34589
Kmt2e	-1.34761	8.85894	-12.8724	5.01e-05	0.000784446	2.7269
Syne1	-1.3474	6.97514	-14.2092	3.09e-05	0.000644763	3.2605
Chid1	-1.34734	6.12115	-5.75789	0.00221255	0.00706696	-1.60456
Ube2e3	-1.34671	7.42988	-9.45246	0.000222895	0.00153527	1.04163
Pdgfd	-1.3454	7.03135	-9.00031	0.000281535	0.00175983	0.774214
Csde1	-1.34518	11.5591	-13.6841	3.72e-05	0.000698018	3.05773
Idh1	-1.34497	8.77897	-12.2142	6.47e-05	0.000853598	2.4417
Ints10	-1.34473	6.53663	-12.65	5.46e-05	0.000813468	2.63229
Hes6	-1.3443	6.70459	-13.2613	4.34e-05	0.000737144	2.88814
Lrrn1	-1.34418	3.70612	-8.91992	0.000293797	0.00180734	0.725329
Dusp22	-1.34407	8.46847	-12.9046	4.95e-05	0.000780843	2.74043
Atrx	-1.34386	8.01554	-10.7275	0.000121407	0.00112426	1.73335
Zfp148	-1.34378	8.51671	-13.0092	4.76e-05	0.000768692	2.78421
Carf	-1.34377	5.21808	-9.52406	0.000215002	0.00150268	1.08284
Nipa1	-1.34308	6.00125	-6.39459	0.00138188	0.00501085	-1.06024
Palm2	-1.34281	6.88311	-7.45485	0.000682974	0.00306376	-0.245727
Rpgrip1l	-1.34256	5.23048	-9.57335	0.000209761	0.00148583	1.11104
Hsdl2	-1.34164	10.7175	-14.2773	3.02e-05	0.000638539	3.28617
Bmp7	-1.34091	5.84758	-11.5494	8.5e-05	0.000954763	2.13663
Ccnj	-1.34034	6.26784	-12.7795	5.19e-05	0.000796118	2.68761
Pex16	-1.34025	8.06128	-13.8586	3.49e-05	0.000680649	3.12604
Lin9	-1.33995	3.44619	-8.79229	0.000314596	0.00187431	0.646844
1110051M20Rik	-1.33968	6.03208	-13.5328	3.93e-05	0.000713302	2.99771
2610008E11Rik	-1.33946	6.59944	-12.8478	5.06e-05	0.000787887	2.7165
Larp4b	-1.33893	9.19283	-12.5967	5.57e-05	0.000820172	2.60938
Tcf7l2	-1.33855	7.00032	-11.6444	8.16e-05	0.000941073	2.18136
Ecd	-1.33807	8.52505	-13.9227	3.42e-05	0.000670308	3.15091
Eif2s3y	-1.33805	7.91641	-3.20816	0.0237523	0.0444187	-4.31904
Depdc5	-1.33738	6.88775	-13.8039	3.56e-05	0.000684435	3.10474
Agmo	-1.33738	5.09871	-13.3242	4.24e-05	0.000727741	2.91376
2019-03-06	-1.33685	10.3057	-13.7929	3.58e-05	0.000685695	3.10045
Snx13	-1.33674	8.96776	-11.4995	8.68e-05	0.00096258	2.11301
2310067E19Rik	-1.33661	4.26719	-7.4817	0.000671655	0.00303153	-0.226436
Ccpg1	-1.33634	8.67362	-11.658	8.12e-05	0.000938096	2.18771
Lphn1	-1.33617	7.10858	-11.1498	0.000100749	0.00102775	1.94436
Clec3b	-1.33614	5.97841	-10.0277	0.000167976	0.00133625	1.36447
Pptc7	-1.33613	9.05812	-13.7465	3.64e-05	0.000690162	3.08225
Mipep	-1.33611	8.47935	-12.944	4.88e-05	0.000777232	2.75696
Chrdl1	-1.33509	4.47957	-9.42563	0.000225941	0.00154743	1.02611
Mapk10	-1.33495	5.59209	-9.90066	0.000178573	0.00136998	1.29476
Olfr1191-ps1	-1.33474	3.36268	-10.8269	0.000116121	0.001098	1.78378
Mrpl10	-1.33427	9.23162	-14.1888	3.11e-05	0.000647943	3.25276
Abcb9	-1.33419	5.88919	-13.5306	3.93e-05	0.000713302	2.99681
Prune2	-1.33411	8.89159	-8.79433	0.00031425	0.0018738	0.648109
Myrfl	-1.33386	4.35624	-7.66414	0.000600346	0.00281632	-0.0969203
Hey1	-1.33372	7.12338	-13.5449	3.91e-05	0.000712962	3.00251
Olfml2a	-1.3336	5.45695	-10.8481	0.000115033	0.00109358	1.79444
Aga	-1.33281	7.34628	-9.22892	0.000249853	0.00163427	0.910994
Gm17296	-1.33249	6.16989	-13.525	3.94e-05	0.000713302	2.99458
G6pc	-1.33241	4.18386	-3.54973	0.0163716	0.0329448	-3.90012
F8	-1.33241	5.1154	-11.0503	0.000105214	0.00105201	1.89536
Axl	-1.3324	9.21426	-9.50887	0.000216648	0.00151073	1.07412
Mmrn1	-1.33239	5.37339	-4.74675	0.00510935	0.0132017	-2.57018
Zfp715	-1.33175	5.90478	-7.17086	0.000817703	0.00346887	-0.453649
Impa2	-1.33151	7.40683	-9.85873	0.000182243	0.00138323	1.27156
Nudt4	-1.33135	10.8461	-12.8264	5.1e-05	0.000790755	2.70746
Xpo7	-1.33122	8.28753	-11.3511	9.24e-05	0.000990488	2.04211
Fundc2	-1.331	9.98857	-13.3179	4.25e-05	0.000727741	2.9112
Trim7	-1.33091	5.07038	-6.7265	0.00109741	0.00425955	-0.793696
Nudt8	-1.33053	7.89791	-12.5614	5.65e-05	0.000824726	2.59413
Nhlrc2	-1.3301	7.72792	-12.319	6.21e-05	0.000845577	2.48818
Anp32a	-1.32985	9.51888	-12.676	5.4e-05	0.000809545	2.64346
Commd8	-1.32967	6.40375	-12.2779	6.31e-05	0.000846586	2.46999
Rab2b	-1.32959	5.88614	-12.9505	4.87e-05	0.000776353	2.75969
Mrpl36	-1.32927	8.3801	-13.0784	4.64e-05	0.000758993	2.81297
Gsn	-1.32922	10.2177	-12.3258	6.19e-05	0.000845577	2.49119
Shroom4	-1.32916	6.69806	-12.2808	6.3e-05	0.000846586	2.47127
Tnxb	-1.32899	7.41624	-8.96362	0.000287055	0.00178197	0.751953
Igsf1	-1.32887	4.74827	-13.4565	4.04e-05	0.00071761	2.96716
Colec12	-1.32878	7.56579	-10.2982	0.000147807	0.00124313	1.51003
Gm10635	-1.32867	3.98921	-9.2968	0.000241275	0.00160432	0.950986
Boc	-1.32835	6.18703	-13.7545	3.63e-05	0.000689271	3.08541
Sf3b5	-1.32831	6.13238	-12.864	5.03e-05	0.000785411	2.72337
Cyp1a2	-1.32828	3.94723	-8.21321	0.000434072	0.00227958	0.276798
Dbi	-1.32773	9.81759	-13.7847	3.59e-05	0.000685695	3.09721
Abcc5	-1.32733	5.92297	-14.1532	3.15e-05	0.000651427	3.23925
Mrpl42	-1.32668	9.09758	-13.7593	3.62e-05	0.000688647	3.08727
Rom1	-1.32645	5.99148	-12.6881	5.38e-05	0.000808271	2.64863
Snx16	-1.32613	5.66032	-6.39982	0.00137677	0.00499755	-1.05596
Mrpl18	-1.32598	8.66808	-13.3749	4.16e-05	0.000723688	2.93429
Mpv17	-1.32588	9.50416	-13.9679	3.36e-05	0.000665279	3.16834
Csnk1g2	-1.32519	9.01989	-14.1089	3.2e-05	0.000653601	3.2224
Ankrd29	-1.32508	5.60573	-8.43691	0.000382424	0.00210642	0.42254
Zfp398	-1.32493	5.93066	-11.1419	0.000101093	0.00103006	1.94051
Fktn	-1.32484	6.61303	-8.78903	0.00031515	0.00187431	0.644825
Dcaf8	-1.32459	8.83564	-8.97312	0.000285613	0.00177614	0.757727
Angptl2	-1.32428	9.46338	-14.1336	3.17e-05	0.000652557	3.2318
Asb3	-1.32393	5.77248	-12.0896	6.8e-05	0.000874085	2.38584
Tmem65	-1.32375	10.3568	-14.1423	3.16e-05	0.000651914	3.23512
Man2b2	-1.32337	7.67267	-12.8324	5.09e-05	0.000789832	2.71001
Dpep1	-1.32317	9.13967	-9.63733	0.000203185	0.00145889	1.14743
B430212C06Rik	-1.32301	4.6444	-8.35241	0.000401027	0.00217619	0.367913
Aldh1b1	-1.32274	6.2014	-11.1549	0.000100527	0.00102678	1.94685
Pcdh7	-1.32259	8.88238	-12.7875	5.18e-05	0.000795421	2.69098
Heg1	-1.32232	9.21301	-13.5588	3.89e-05	0.000712559	3.00807
Osbpl8	-1.32229	8.95004	-9.50682	0.000216871	0.00151141	1.07295
Apoa1bp	-1.32227	8.85443	-12.3598	6.11e-05	0.000841343	2.50617
Dusp28	-1.32176	6.44817	-10.905	0.00011216	0.00107988	1.82306
Pts	-1.32176	6.82305	-14.1061	3.2e-05	0.000653601	3.22132
Map7d1	-1.32169	8.87892	-12.4581	5.88e-05	0.000834829	2.54923
4632427E13Rik	-1.32134	7.32864	-11.2912	9.48e-05	0.000996326	2.01322
Cd83	-1.3212	5.7168	-13.8058	3.56e-05	0.000684435	3.10546
Cox14	-1.3212	8.09398	-12.7645	5.22e-05	0.000798379	2.68121
Hsd17b7	-1.32047	7.50119	-7.3629	0.000723501	0.00319404	-0.31228
Fgf10	-1.32031	3.52001	-13.8573	3.5e-05	0.000680649	3.12554
Rab1b	-1.32026	10.5348	-12.0615	6.88e-05	0.000878728	2.37319
Lrba	-1.32008	7.79275	-13.5915	3.84e-05	0.000707567	3.02107
Kcnip3	-1.31986	5.91933	-10.4794	0.000135905	0.00119304	1.60541
Ly86	-1.31984	7.51543	-3.18887	0.0242702	0.0452204	-4.3432
[truncated: 22,196 more rows]
