# Supplementary material for: Identification of Differentially Expressed Genes and Signaling Pathways in Acute Myocardial Infarction Based on Integrated Bioinformatics Analysis
Source: Cardiovasc Ther. 2019 Aug 1;2019:8490707. doi: 10.1155/2019/8490707 (PMC6739802; doi:10.1155/2019/8490707)
Supplement: Supplementary Materials — A PPI network: there were 56 nodes and 240 edges in this network, including 2 down- and 54 upregulated genes (see the supplementary document). [file 8490707.f1.zip › DMNC and MCC/DMNC.csv]

Top 10 in network string_interactions.tsv ranked by DMNC method
Rank	Name	Score
1	Ccr1	0.8579627954366184
2	Tnfaip6	0.8353255749705149
3	Il1r2	0.8164038675947065
4	Cxcl5	0.8011887576329443
5	Mmp8	0.7538332954668043
6	Ptx3	0.7463835476845003
7	Cxcl1	0.7437754804574024
8	Arg1	0.7280666812546157
9	Cd14	0.7126589204435658
10	Cxcl2	0.7062311150165795
