# Supplementary material for: Identification of Differentially Expressed Genes and Signaling Pathways in Acute Myocardial Infarction Based on Integrated Bioinformatics Analysis
Source: Cardiovasc Ther. 2019 Aug 1;2019:8490707. doi: 10.1155/2019/8490707 (PMC6739802; doi:10.1155/2019/8490707)
Supplement: Supplementary Materials — A PPI network: there were 56 nodes and 240 edges in this network, including 2 down- and 54 upregulated genes (see the supplementary document). [file 8490707.f1.zip › DMNC and MCC/MCC.csv]

Top 10 in network string_interactions.tsv ranked by MCC method
Rank	Name	Score
1	Ccl2	1555838.0
2	Il6	1555459.0
3	Il1b	1554428.0
4	Cxcl2	1547520.0
5	Cxcl1	1547400.0
6	Mmp8	1295304.0
7	Cxcl5	1254960.0
8	Ptgs2	1140036.0
9	Spp1	1134852.0
10	Ccl3	858960.0
