# Supplementary material for: Identification of Differentially Expressed Genes and Signaling Pathways in Acute Myocardial Infarction Based on Integrated Bioinformatics Analysis
Source: Cardiovasc Ther. 2019 Aug 1;2019:8490707. doi: 10.1155/2019/8490707 (PMC6739802; doi:10.1155/2019/8490707)
Supplement: Supplementary Materials — A PPI network: there were 56 nodes and 240 edges in this network, including 2 down- and 54 upregulated genes (see the supplementary document). [file 8490707.f1.zip › GO and KEGG/GO.xlsx]

## Sheet: GO(1)
ID	Description	GeneRatio	BgRatio	pvalue	p.adjust	qvalue	geneID	Count
GO:0048018	receptor ligand activity	13/55	486/23049	8.99492e-11	1.91592e-08	1.28769e-08	Cxcl2/Il6/Cxcl1/Cxcl5/Spp1/Il1b/Hbegf/Ccl3/Lgals3/Pgf/Gdf15/Ccl2/Nppb	13
GO:0005125	cytokine activity	9/55	222/23049	2.62576e-09	2.79643e-07	1.87949e-07	Cxcl2/Il6/Cxcl1/Cxcl5/Spp1/Il1b/Ccl3/Gdf15/Ccl2	9
GO:0008009	chemokine activity	5/55	43/23049	5.76926e-08	3.7781e-06	2.53927e-06	Cxcl2/Cxcl1/Cxcl5/Ccl3/Ccl2	5
GO:0005126	cytokine receptor binding	9/55	325/23049	7.09502e-08	3.7781e-06	2.53927e-06	Cxcl2/Il6/Cxcl1/Cxcl5/Il1b/Ccl3/Pgf/Gdf15/Ccl2	9
GO:0042379	chemokine receptor binding	5/55	66/23049	5.13806e-07	2.18881e-05	1.47111e-05	Cxcl2/Cxcl1/Cxcl5/Ccl3/Ccl2	5
GO:0045236	CXCR chemokine receptor binding	3/55	14/23049	4.59352e-06	0.00016307	0.0001096	Cxcl2/Cxcl1/Cxcl5	3
GO:0008083	growth factor activity	5/55	146/23049	2.56661e-05	0.000780984	0.000524902	Il6/Cxcl1/Hbegf/Pgf/Gdf15	5
GO:0030246	carbohydrate binding	6/55	268/23049	4.20154e-05	0.00111866	0.000751855	Chil3/Ptx3/Selp/Lgals3/Cd24a/Clec4d	6
GO:0001664	G-protein coupled receptor binding	6/55	286/23049	6.02692e-05	0.00142637	0.000958667	Cxcl2/Cxcl1/Cxcl5/Hspa1a/Ccl3/Ccl2	6
GO:0050542	icosanoid binding	2/55	10/23049	0.000248517	0.00481219	0.00323429	S100a8/S100a9	2
GO:0050543	icosatetraenoic acid binding	2/55	10/23049	0.000248517	0.00481219	0.00323429	S100a8/S100a9	2
GO:0070851	growth factor receptor binding	4/55	145/23049	0.000399461	0.00702552	0.00472187	Il6/Il1b/Hbegf/Pgf	4
GO:0035325	Toll-like receptor binding	2/55	13/23049	0.000428787	0.00702552	0.00472187	S100a8/S100a9	2
GO:0036041	long-chain fatty acid binding	2/55	17/23049	0.000743064	0.0105515	0.0070917	S100a8/S100a9	2
GO:0070492	oligosaccharide binding	2/55	17/23049	0.000743064	0.0105515	0.0070917	Selp/Lgals3	2
GO:0016209	antioxidant activity	3/55	81/23049	0.000961581	0.012801	0.00860362	S100a8/S100a9/Ptgs2	3
GO:0005539	glycosaminoglycan binding	4/55	196/23049	0.00123251	0.0154426	0.010379	Selp/Hbegf/Ccl2/Tnfaip6	4
GO:0019956	chemokine binding	2/55	24/23049	0.00149192	0.0167252	0.0112411	Pdpn/Ccr1	2
GO:0051787	misfolded protein binding	2/55	24/23049	0.00149192	0.0167252	0.0112411	Hspa1b/Hspa1a	2
GO:0001530	lipopolysaccharide binding	2/55	25/23049	0.00161918	0.0172442	0.0115899	Selp/Cd14	2
GO:0031406	carboxylic acid binding	4/55	214/23049	0.00170143	0.0172574	0.0115987	S100a8/S100a9/Selp/Tnfaip6	4
GO:0043177	organic acid binding	4/55	219/23049	0.00185099	0.0179209	0.0120447	S100a8/S100a9/Selp/Tnfaip6	4
GO:0019955	cytokine binding	3/55	107/23049	0.0021413	0.0198303	0.013328	Il1r2/Pdpn/Ccr1	3
GO:0001968	fibronectin binding	2/55	30/23049	0.00232993	0.0206782	0.0138979	Tnc/Igfbp3	2
GO:1901567	fatty acid derivative binding	2/55	33/23049	0.00281513	0.0239849	0.0161203	S100a8/S100a9	2
GO:0044183	protein binding involved in protein folding	2/55	39/23049	0.00391477	0.032071	0.021555	Hspa1b/Hspa1a	2
GO:0031072	heat shock protein binding	3/55	135/23049	0.00412755	0.0325618	0.0218848	Hspa1b/Hspa1a/Cd24a	3
GO:0005504	fatty acid binding	2/55	43/23049	0.00474163	0.0360702	0.0242429	S100a8/S100a9	2
GO:0008201	heparin binding	3/55	145/23049	0.00503727	0.0369979	0.0248664	Selp/Hbegf/Ccl2	3
GO:0048020	CCR chemokine receptor binding	2/55	46/23049	0.00540996	0.0384107	0.025816	Ccl3/Ccl2	2
