# Supplementary material for: Identification of Differentially Expressed Genes and Signaling Pathways in Acute Myocardial Infarction Based on Integrated Bioinformatics Analysis
Source: Cardiovasc Ther. 2019 Aug 1;2019:8490707. doi: 10.1155/2019/8490707 (PMC6739802; doi:10.1155/2019/8490707)
Supplement: Supplementary Materials — A PPI network: there were 56 nodes and 240 edges in this network, including 2 down- and 54 upregulated genes (see the supplementary document). [file 8490707.f1.zip › GO and KEGG/KEGG.xlsx]

## Sheet: KEGG(1)
ID	Description	GeneRatio	BgRatio	pvalue	p.adjust	qvalue	geneID	Count
mmu04657	IL-17 signaling pathway	9/40	91/8600	2.32e-10	3.3e-08	2.1e-08	Cxcl2/S100a8/S100a9/Il6/Cxcl1/Cxcl5/Il1b/Ptgs2/Ccl2	9
mmu05134	Legionellosis	7/40	58/8600	6.85e-09	4.87e-07	3.1e-07	Cxcl2/Il6/Cxcl1/Hspa1b/Hspa1a/Il1b/Cd14	7
mmu04060	Cytokine-cytokine receptor interaction	10/40	296/8600	6.8e-07	3.22e-05	2.05e-05	Cxcl2/Il1r2/Il6/Cxcl1/Cxcl5/Il1b/Ccl3/Gdf15/Ccl2/Ccr1	10
mmu05132	Salmonella infection	6/40	78/8600	1.38e-06	4.88e-05	3.11e-05	Cxcl2/Il6/Cxcl1/Il1b/Ccl3/Cd14	6
mmu04668	TNF signaling pathway	6/40	110/8600	1.03e-05	0.000292216	0.000186291	Cxcl2/Il6/Cxcl1/Il1b/Ptgs2/Ccl2	6
mmu05323	Rheumatoid arthritis	5/40	84/8600	3.97e-05	0.00093865	0.000598398	Il6/Cxcl5/Il1b/Ccl3/Ccl2	5
mmu04640	Hematopoietic cell lineage	5/40	95/8600	7.17e-05	0.00129771	0.000827302	Il1r2/Il6/Il1b/Cd24a/Cd14	5
mmu05144	Malaria	4/40	49/8600	7.31e-05	0.00129771	0.000827302	Il6/Selp/Il1b/Ccl2	4
mmu04620	Toll-like receptor signaling pathway	5/40	99/8600	8.73e-05	0.0013777	0.000878294	Il6/Spp1/Il1b/Ccl3/Cd14	5
mmu05142	Chagas disease (American trypanosomiasis)	5/40	103/8600	0.000105431	0.00149713	0.000954431863Il1r24	Serpine1/Il6/Il1b/Ccl3/Ccl2	5
mmu05146	Amoebiasis	5/40	106/8600	0.000120813	0.00155959	0.000994252	Arg1/Il1r2/Il6/Il1b/Cd14	5
mmu05163	Human cytomegalovirus infection	7/40	256/8600	0.000153378	0.00181497	0.00115706	Il6/Il1b/Ptgs2/Ccl3/Myc/Ccl2/Ccr1	7
mmu05202	Transcriptional misregulation in cancer	6/40	183/8600	0.000179856	0.00196458	0.00125244	Il1r2/Il6/Gadd45g/Myc/Cd14/Igfbp3	6
mmu04062	Chemokine signaling pathway	6/40	200/8600	0.000291266	0.00295427	0.00188337	Cxcl2/Cxcl1/Cxcl5/Ccl3/Ccl2/Ccr1	6
mmu04010	MAPK signaling pathway	7/40	294/8600	0.000358914	0.00339772	0.00216608	Hspa1b/Hspa1a/Il1b/Gadd45g/Myc/Pgf/Cd14	7
mmu05133	Pertussis	4/40	76/8600	0.000404457	0.00358955	0.00228837	Il6/Cxcl5/Il1b/Cd14	4
mmu05167	Kaposi sarcoma-associated herpesvirus infection	6/40	217/8600	0.000451092	0.00376794	0.0024021	Cxcl2/Il6/Cxcl1/Ptgs2/Myc/Ccr1	6
mmu05020	Prion diseases	3/40	34/8600	0.00050479	0.00398223	0.00253871	Il6/Hspa1a/Il1b	3
mmu04933	AGE-RAGE signaling pathway in diabetic complications	4/40	101/8600	0.00118397	0.0088486	0.00564107	Serpine1/Il6/Il1b/Ccl2	4
mmu04066	HIF-1 signaling pathway	4/40	105/8600	0.00136778	0.00971125	0.00619101	Serpine1/Il6/Hmox1/Slc2a1	4
mmu04064	NF-kappa B signaling pathway	4/40	109/8600	0.00157071	0.0103044	0.00656913	Cxcl2/Il1b/Ptgs2/Cd14	4
mmu04218	Cellular senescence	5/40	186/8600	0.00159645	0.0103044	0.00656913	Serpine1/Il6/Gadd45g/Myc/Igfbp3	5
mmu04625	C-type lectin receptor signaling pathway	4/40	112/8600	0.00173608	0.0107184	0.00683307	Il6/Il1b/Ptgs2/Clec4d	4
mmu04621	NOD-like receptor signaling pathway	5/40	206/8600	0.00249889	0.0147851	0.00942562	Cxcl2/Il6/Cxcl1/Il1b/Ccl2	5
mmu04213	Longevity regulating pathway - multiple species	3/40	62/8600	0.00291575	0.0165614	0.0105581	Irs1/Hspa1b/Hspa1a	3
mmu05418	Fluid shear stress and atherosclerosis	4/40	143/8600	0.00421009	0.0218882	0.0139539	Il1r2/Hmox1/Il1b/Ccl2	4
mmu04115	p53 signaling pathway	3/40	71/8600	0.00428104318Ptgs24	0.0218882	0.0139539	Serpine1/Gadd45g/Igfbp3	3
mmu05162	Measles	4/40	144/8600	0.00431598	0.0218882	0.0139539	Il6/Hspa1b/Hspa1a/Il1b	4
mmu04151	PI3K-Akt signaling pathway	6/40	358/8600	0.00577525	0.0282788	0.018028	Irs1/Il6/Tnc/Spp1/Myc/Pgf	6
mmu04610	Complement and coagulation cascades	3/40	88/8600	0.00778421	0.0368453	0.0234892	Serpine1/Plaur/Procr	3
mmu01523	Antifolate resistance	2/40	30/8600	0.0084513	0.0387124	0.0246795	Il6/Il1b	2
mmu05222	Small cell lung cancer	3/40	92/8600	0.00879497	0.0387262	0.0246883	Ptgs2/Gadd45g/Myc	3
mmu05152	Tuberculosis	4/40	178/8600	0.00907184	0.0387262	0.0246883	Il6/Il1b/Cd14/Sphk1	4
mmu05206	MicroRNAs in cancer	5/40	281/8600	0.00927247	0.0387262	0.0246883	Irs1/Tnc/Hmox1/Ptgs2/Myc	5
mmu05216	Thyroid cancer	2/40	37/8600	0.0126771	0.0514326	0.0327888	Gadd45g/Myc	2
mmu05143	African trypanosomiasis	2/40	39/8600	0.0140225	0.054771	0.034917	Il6/Il1b	2
mmu04931	Insulin resistance	3/40	110/8600	0.0142713	0.054771	0.034917	Irs1/Il6/Slc2a1	3
mmu05219	Bladder cancer	2/40	41/8600	0.0154272	0.0576489	0.0367517	Hbegf/Myc	2
mmu04068	FoxO signaling pathway	3/40	132/8600	0.0231003	0.0841088	0.0536201	Irs1/Il6/Gadd45g	3
mmu04915	Estrogen signaling pathway	3/40	134/8600	0.0240216	0.0852766	0.0543646	Hspa1b/Hspa1a/Hbegf	3
mmu04371	Apelin signaling pathway	3/40	139/8600	0.0264116	0.0901605	0.0574781	Serpine1/Spp1/Sphk1	3
mmu05166	Human T-cell leukemia virus 1 infection	4/40	246/8600	0.0266672	0.0901605	0.0574781	Il1r2/Il6/Myc/Slc2a1	4
mmu04923	Regulation of lipolysis in adipocytes	2/40	56/8600	0.027735	0.0915898	0.0583894	Irs1/Ptgs2	2
mmu04370	VEGF signaling pathway	2/40	58/8600	0.0295977	0.0933971	0.0595415	Ptgs2/Sphk1	2
mmu05213	Endometrial cancer	2/40	58/8600	0.0295977	0.0933971	0.0595415	Gadd45g/Myc	2
mmu05321	Inflammatory bowel disease (IBD)	2/40	59/8600	0.0305474	0.0942984	0.0601161	Il6/Il1b	2
mmu04932	Non-alcoholic fatty liver disease (NAFLD)	3/40	151/8600	0.0326528	0.0986532	0.0628923	Irs1/Il6/Il1b	3
mmu04623	Cytosolic DNA-sensing pathway	2/40	64/8600	0.0354746	0.102804	0.0655385	Il6/Il1b	2
mmu05230	Central carbon metabolism in cancer	2/40	64/8600	0.0354746	0.102804	0.0655385	Myc/Slc2a1	2
mmu05332	Graft-versus-host disease	2/40	65/8600	0.0364949	0.103646	0.066075	Il6/Il1b	2
mmu05140	Leishmaniasis	2/40	67/8600	0.0385694	0.107389	0.0684616	Il1b/Ptgs2	2
mmu05164	Influenza A	3/40	164/8600	0.0402122	0.109014	0.0694972	Il6/Il1b/Ccl2	3
mmu05221	Acute myeloid leukemia	2/40	69/8600	0.0406882	0.109014	0.0694972	Myc/Cd14	2
mmu04920	Adipocytokine signaling pathway	2/40	71/8600	0.0428504	0.112681	0.0718349	Irs1/Slc2a1	2
mmu05225	Hepatocellular carcinoma	3/40	171/8600	0.0446216	0.115205	0.0734442	Hmox1/Gadd45g/Myc	3
mmu05220	Chronic myeloid leukemia	2/40	76/8600	0.0484395	0.122829	0.0783045	Gadd45g/Myc	2
mmu01230	Biosynthesis of amino acids	2/40	78/8600	0.0507462	0.12642	0.0805942	Arg1/Psat1	2
mmu04512	ECM-receptor interaction	2/40	83/8600	0.0566828	0.138775	0.0884704	Tnc/Spp1	2
mmu04012	ErbB signaling pathway	2/40	84/8600	0.0578983	0.139348	0.0888359	Hbegf/Myc	2
mmu05210	Colorectal cancer	2/40	88/8600	0.0628509	0.148747	0.0948277	Gadd45g/Myc	2
mmu04510	Focal adhesion	3/40	199/8600	0.0645537	0.150273	0.0958001	Tnc/Spp1/Pgf	3
mmu04612	Antigen processing and presentation	2/40	91/8600	0.0666574	0.152667	0.0973266	Hspa1b/Hspa1a	2
mmu05205	Proteoglycans in cancer	3/40	204/8600	0.0684855	0.154364	0.0984086	Hbegf/Plaur/Myc	3
mmu00120	Primary bile acid biosynthesis	1/40	16/8600	0.0719387	0.159614	0.101755	12642	1
mmu04659	Th17 cell differentiation	2/40	102/8600	0.081243	0.177485	0.113148	Il6/Il1b	2
mmu00220	Arginine biosynthesis	1/40	19/8600	0.0848537	0.182564	0.116386	Arg1	1
mmu05145	Toxoplasmosis	2/40	108/8600	0.0895818	0.189259	0.120655	Hspa1b/Hspa1a	2
mmu05169	Epstein-Barr virus infection	3/40	230/8600	0.0906313	0.189259	0.120655	Il6/Gadd45g/Myc	3
mmu04919	Thyroid hormone signaling pathway	2/40	115/8600	0.0996184	0.205012	0.130697	Myc/Slc2a1	2
mmu04110	Cell cycle	2/40	123/8600	0.111458	0.226101	0.144141	Gadd45g/Myc	2
mmu04380	Osteoclast differentiation	2/40	128/8600	0.11904	0.23808	0.151778	Il1b/Tyrobp	2
mmu03040	Spliceosome	2/40	133/8600	0.12675	0.249979	0.159364	Hspa1b/Hspa1a	2
mmu05224	Breast cancer	2/40	147/8600	0.148939	0.289716	0.184697	Gadd45g/Myc	2
mmu05226	Gastric cancer	2/40	150/8600	0.153795	0.295121	0.188142	Gadd45g/Myc	2
mmu04390	Hippo signaling pathway	2/40	154/8600	0.16032	0.30354	0.193509	Serpine1/Myc	2
mmu04960	Aldosterone-regulated sodium reabsorption	1/40	38/8600	0.162672	0.30394	0.193765	Irs1	1
mmu00260	Glycine, serine and threonine metabolism	1/40	40/8600	0.170478	0.307119	0.195791	Psat1	1
mmu00860	Porphyrin and chlorophyll metabolism	1/40	41/8600	0.174354	0.307119	0.195791	Hmox1	1
mmu04216	Ferroptosis	1/40	41/8600	0.174354	0.307119	0.195791	Hmox1	1
mmu04141	Protein processing in endoplasmic reticulum	2/40	163/8600	0.175187	0.307119	0.195791	Hspa1b/Hspa1a	2
mmu05161	Hepatitis B	2/40	163/8600	0.175187	0.307119	0.195791	Il6/Myc	2
mmu04630	JAK-STAT signaling pathway	2/40	165/8600	0.178523	0.309149	0.197085	Il6/Myc	2
mmu04672	Intestinal immune network for IgA production	1/40	43/8600	0.182054	0.311466	0.198562	Il6	1
mmu04978	Mineral absorption	1/40	45/8600	0.189684	0.317873	0.202647	Hmox1	1
mmu04022	cGMP-PKG signaling pathway	2/40	172/8600	0.190276	0.317873	0.202647	Irs1/Nppb	2
mmu00600	Sphingolipid metabolism	1/40	48/8600	0.200998	0.328066	0.209145	Sphk1	1
mmu04930	Type II diabetes mellitus	1/40	48/8600	0.200998	0.328066	0.209145	Irs1	1
mmu04145	Phagosome	2/40	181/8600	0.205544	0.331673	0.211445	Cd14/Tubb6	2
mmu00330	Arginine and proline metabolism	1/40	50/8600	0.208455	0.332591	0.21203	Arg1	1
mmu04913	Ovarian steroidogenesis	1/40	57/8600	0.234025	0.36695	0.233934	Ptgs2	1
mmu05165	Human papillomavirus infection	3/40	361/8600	0.235158	0.36695	0.233934	Tnc/Spp1/Ptgs2	3
mmu05217	Basal cell carcinoma	1/40	63/8600	0.2553	0.394049	0.25121	Gadd45g	1
mmu05223	Non-small cell lung cancer	1/40	66/8600	0.26572	0.405722	0.258652	Gadd45g	1
mmu05211	Renal cell carcinoma	1/40	68/8600	0.272587	0.411781	0.262514	Slc2a1	1
mmu04940	Type I diabetes mellitus	1/40	70/8600	0.279392	0.417618	0.266235	Il1b	1
mmu04976	Bile secretion	1/40	72/8600	0.286135	0.418878	0.267039	Slc2a1	1
mmu05218	Melanoma	1/40	72/8600	0.286135	0.418878	0.267039	Gadd45g	1
mmu05212	Pancreatic cancer	1/40	75/8600	0.296134	0.424758	0.270787	Gadd45g	1
mmu05214	Glioma	1/40	75/8600	0.296134	0.424758	0.270787	Gadd45g	1
mmu01521	EGFR tyrosine kinase inhibitor resistance	1/40	80/8600	0.312497	0.443745	0.282892	Il6	1
mmu04540	Gap junction	1/40	86/8600	0.331643	0.451193	0.287639	Tubb6	1
mmu04911	Insulin secretion	1/40	86/8600	0.331643	0.451193	0.287639	Slc2a1	1
mmu05410	Hypertrophic cardiomyopathy (HCM)	1/40	86/8600	0.331643	0.451193	0.287639	Il6	1
mmu04666	Fc gamma R-mediated phagocytosis	1/40	87/8600	0.334783	0.451193	0.287639	Sphk1	1
mmu05168	Herpes simplex virus 1 infection	3/40	439/8600	0.334886	0.451193	0.287639	Il6/Il1b/Ccl2	3
mmu00590	Arachidonic acid metabolism	1/40	89/8600	0.34102	0.451193	0.287639	Ptgs2	1
mmu04211	Longevity regulating pathway	1/40	90/8600	0.344117	0.451193	0.287639	Irs1	1
mmu04912	GnRH signaling pathway	1/40	90/8600	0.344117	0.451193	0.287639	Hbegf	1
mmu00830	Retinol metabolism	1/40	91/8600	0.3472	0.451193	0.287639	19378	1
mmu01522	Endocrine resistance	1/40	93/8600	0.353323	0.451193	0.287639	Hbegf	1
mmu04350	TGF-beta signaling pathway	1/40	93/8600	0.353323	0.451193	0.287639	Myc	1
mmu05204	Chemical carcinogenesis	1/40	94/8600	0.356364	0.451193	0.287639	Ptgs2	1
mmu04144	Endocytosis	2/40	270/8600	0.359081	0.451193	0.287639	Hspa1b/Hspa1a	2
mmu05150	Staphylococcus aureus infection	1/40	96/8600	0.362403	0.451193	0.287639	Selp	1
mmu05215	Prostate cancer	1/40	97/8600	0.365402	0.451193	0.287639	Il1r2	1
mmu04922	Glucagon signaling pathway	1/40	102/8600	0.380193	0.465408	0.296702	Slc2a1	1
mmu04928	Parathyroid hormone synthesis, secretion and action	1/40	107/8600	0.394646	0.478973	0.305349	Hbegf	1
mmu04650	Natural killer cell mediated cytotoxicity	1/40	118/8600	0.425298	0.511799	0.326276	Tyrobp	1
mmu01200	Carbon metabolism	1/40	120/8600	0.430706	0.512846	0.326944	Psat1	1
mmu04722	Neurotrophin signaling pathway	1/40	121/8600	0.433391	0.512846	0.326944	Irs1	1
mmu04071	Sphingolipid signaling pathway	1/40	124/8600	0.441373	0.517975	0.330214	Sphk1	1
mmu04152	AMPK signaling pathway	1/40	126/8600	0.446634	0.518641	0.330639	Irs1	1
mmu04750	Inflammatory mediator regulation of TRP channels	1/40	127/8600	0.449246	0.518641	0.330639	Il1b	1
mmu04140	Autophagy - animal	1/40	130/8600	0.45701	0.52335	0.33364	Irs1	1
mmu04726	Serotonergic synapse	1/40	132/8600	0.462127	0.524976	0.334677	Ptgs2	1
mmu04210	Apoptosis	1/40	136/8600	0.47222	0.530714	0.338335	Gadd45g	1
mmu04550	Signaling pathways regulating pluripotency of stem cells	1/40	137/8600	0.474714	0.530714	0.338335	Myc	1
mmu04270	Vascular smooth muscle contraction	1/40	140/8600	0.482128	0.530714	0.338335	Nppb	1
mmu04910	Insulin signaling pathway	1/40	140/8600	0.482128	0.530714	0.338335	Irs1	1
mmu04072	Phospholipase D signaling pathway	1/40	149/8600	0.503763	0.548609	0.349744	Sphk1	1
mmu04723	Retrograde endocannabinoid signaling	1/40	150/8600	0.506111	0.548609	0.349744	Ptgs2	1
mmu04921	Oxytocin signaling pathway	1/40	154/8600	0.515399	0.552726	0.352368	Ptgs2	1
mmu04150	mTOR signaling pathway	1/40	155/8600	0.517694	0.552726	0.352368	Irs1	1
mmu04310	Wnt signaling pathway	1/40	160/8600	0.529011	0.556441	0.354736	Myc	1
mmu05160	Hepatitis C	1/40	160/8600	0.529011	0.556441	0.354736	Myc	1
mmu04514	Cell adhesion molecules (CAMs)	1/40	171/8600	0.553005	0.577402	0.368099	Selp	1
mmu05010	Alzheimer disease	1/40	175/8600	0.561431	0.581922	0.37098	Il1b	1
mmu04217	Necroptosis	1/40	177/8600	0.565586	0.58198	0.371018	Il1b	1
mmu04020	Calcium signaling pathway	1/40	189/8600	0.589721	0.602449	0.384067	Sphk1	1
mmu04015	Rap1 signaling pathway	1/40	209/8600	0.627071	0.636029	0.405474	Pgf	1
mmu04714	Thermogenesis	1/40	232/8600	0.665933	0.66753	0.425557	Nppb	1
mmu04014	Ras signaling pathway	1/40	233/8600	0.66753	0.66753	0.425557	Pgf	1
