# Supplementary material for: Identification of Differentially Expressed Genes and Signaling Pathways in Acute Myocardial Infarction Based on Integrated Bioinformatics Analysis
Source: Cardiovasc Ther. 2019 Aug 1;2019:8490707. doi: 10.1155/2019/8490707 (PMC6739802; doi:10.1155/2019/8490707)
Supplement: Supplementary Materials — A PPI network: there were 56 nodes and 240 edges in this network, including 2 down- and 54 upregulated genes (see the supplementary document). [file 8490707.f1.zip › PPI network of module/111.xlsx]

## Sheet: 111
SUID	MCODE_Cluster	MCODE_Node_Status	MCODE_Score	name	selected	shared name
92	Cluster 1	Clustered	8.30769	Cxcl5	FALSE	Cxcl5
123	Cluster 1	Clustered	7.82222	Arg1	FALSE	Arg1
91	Cluster 1	Clustered	8.66667	Cxcl1	FALSE	Cxcl1
89	Cluster 1	Clustered	8.59091	Spp1	FALSE	Spp1
180	Cluster 1	Clustered	7.27273	Selp	FALSE	Selp
84	Cluster 1	Clustered	7.27273	Ptx3	FALSE	Ptx3
83	Cluster 1	Clustered	7.82222	Tnfaip6	FALSE	Tnfaip6
114	Cluster 1	Clustered	7.62857	Mmp8	FALSE	Mmp8
80	Cluster 1	Clustered	8.19231	Serpine1	FALSE	Serpine1
110	Cluster 1	Clustered	8.66667	Ptgs2	FALSE	Ptgs2
78	Cluster 1	Clustered	8.66667	Il6	FALSE	Il6
76	Cluster 1	Clustered	8	Il1r2	FALSE	Il1r2
75	Cluster 1	Clustered	8.66667	Il1b	FALSE	Il1b
103	Cluster 1	Clustered	8.83636	Ccl3	FALSE	Ccl3
102	Cluster 1	Seed	9	Ccr1	FALSE	Ccr1
166	Cluster 1	Clustered	7.82222	Hmox1	FALSE	Hmox1
100	Cluster 1	Clustered	8.66667	Cxcl2	FALSE	Cxcl2
98	Cluster 1	Clustered	8.66667	Ccl2	FALSE	Ccl2
