# Supplementary material for: Identification of Differentially Expressed Genes and Signaling Pathways in Acute Myocardial Infarction Based on Integrated Bioinformatics Analysis
Source: Cardiovasc Ther. 2019 Aug 1;2019:8490707. doi: 10.1155/2019/8490707 (PMC6739802; doi:10.1155/2019/8490707)
Supplement: Supplementary Materials — A PPI network: there were 56 nodes and 240 edges in this network, including 2 down- and 54 upregulated genes (see the supplementary document). [file 8490707.f1.zip › The heatmap of three gene expression microarrays by utilizing the RRA approach/downSig.xlsx]

## Sheet: Sheet1
Name	Pvalue	adjPvalue	logFC
Irs1	1.27005e-06	0.0312914	-1.5853
Prox1	1.58075e-06	0.0389466	-1.43196
