# Supplementary material for: Identification of Differentially Expressed Genes and Signaling Pathways in Acute Myocardial Infarction Based on Integrated Bioinformatics Analysis
Source: Cardiovasc Ther. 2019 Aug 1;2019:8490707. doi: 10.1155/2019/8490707 (PMC6739802; doi:10.1155/2019/8490707)
Supplement: Supplementary Materials — A PPI network: there were 56 nodes and 240 edges in this network, including 2 down- and 54 upregulated genes (see the supplementary document). [file 8490707.f1.zip › The heatmap of three gene expression microarrays by utilizing the RRA approach/upSig.xlsx]

## Sheet: Sheet1
Name	Pvalue	adjPvalue	logFC
Cxcl2	1.02701e-10	2.53035e-06	4.84134
S100a8	2.00588e-10	4.94209e-06	4.77191
Arg1	8.21608e-10	2.02428e-05	4.1434
Il1r2	1.85765e-09	4.57687e-05	3.71941
S100a9	2.13586e-09	5.26233e-05	4.32907
Chil3	3.13419e-09	7.72201e-05	3.69018
Slfn1	3.94817e-09	9.72751e-05	3.39896
Slfn4	4.40331e-09	0.000108489	3.82754
Ch25h	7.88391e-09	0.000194244	3.21755
Serpine1	1.01604e-08	0.000250332	3.22685
Il6	1.95244e-08	0.000481043	4.86025
Ptx3	2.66082e-08	0.000655573	3.51572
Cxcl1	2.98629e-08	0.000735763	3.55895
Cxcl5	3.33728e-08	0.00082224	3.57076
Tnc	3.91371e-08	0.00096426	3.21704
Adam8	5.01564e-08	0.00123575	3.03026
Hspa1b	5.93018e-08	0.00146108	4.00371
Spp1	6.5895e-08	0.00162352	3.77227
Hmox1	9.51894e-08	0.00234528	3.00353
Hspa1a	9.88977e-08	0.00243664	4.1371
Selp	1.18889e-07	0.00292919	2.97154
Ankrd2	1.32088e-07	0.00325438	2.73018
Cytip	1.46229e-07	0.00360278	2.72647
Il1b	1.61344e-07	0.0039752	3.38899
Ptgs2	1.66605e-07	0.00410482	3.28996
Hbegf	1.88792e-07	0.00465145	2.74396
Ccl3	1.9463e-07	0.0047953	2.84513
Gadd45g	2.12866e-07	0.00524458	2.91901
Pdpn	2.45729e-07	0.00605427	2.20173
Cd53	3.21264e-07	0.00791531	2.41632
Plaur	3.55354e-07	0.00875521	2.75332
Myc	3.64237e-07	0.00897408	2.83163
Aldh1a2	3.82446e-07	0.0094227	2.17307
Plac8	3.82446e-07	0.0094227	2.05646
Lgals3	4.20663e-07	0.0103643	2.56499
Pgf	4.306e-07	0.0106091	2.944
Gdf15	4.5094e-07	0.0111103	2.25363
Ccl2	4.61346e-07	0.0113666	3.31344
Mmp8	4.71911e-07	0.0116269	2.67156
Ctla2b	4.82636e-07	0.0118912	2.29188
Cd24a	4.93522e-07	0.0121594	2.45055
Clec4d	5.38703e-07	0.0132726	3.08003
Cd14	5.62292e-07	0.0138538	2.44608
Slc2a1	7.326e-07	0.0180498	2.41099
Procr	7.46965e-07	0.0184037	2.63347
Ifitm6	7.61515e-07	0.0187622	2.45463
Igfbp3	9.34231e-07	0.0230176	2.37473
Tnfaip6	1.11231e-06	0.027405	1.96357
Sphk1	1.20926e-06	0.0297937	2.30528
Nppb	1.41974e-06	0.0349795	1.93666
Tyrobp	1.41974e-06	0.0349795	1.97561
Tubb6	1.48733e-06	0.036645	2.42844
Ccr1	1.80507e-06	0.0444734	2.91048
Psat1	1.91123e-06	0.0470888	1.87772
Ier3	1.91123e-06	0.0470888	2.10648
