# Supplementary material for: Identification of Differentially Expressed Genes and Signaling Pathways in Acute Myocardial Infarction Based on Integrated Bioinformatics Analysis
Source: Cardiovasc Ther. 2019 Aug 1;2019:8490707. doi: 10.1155/2019/8490707 (PMC6739802; doi:10.1155/2019/8490707)
Supplement: Supplementary Materials — A PPI network: there were 56 nodes and 240 edges in this network, including 2 down- and 54 upregulated genes (see the supplementary document). [file 8490707.f1.zip › Whole PPI network/string_interactions.xlsm]

## Sheet: string_interactions
#node1	node2	node1_string_internal_id	node2_string_internal_id	node1_external_id	node2_external_id	neighborhood_on_chromosome	gene_fusion	phylogenetic_cooccurrence	homology	coexpression	experimentally_determined_interaction	database_annotated	automated_textmining	combined_score
S100a9	S100a8	5033455	5025800	10090.ENSMUSP00000112843	10090.ENSMUSP00000064385	0	0	0	0.849	0.986	0.824	0.9	0.843	0.999
Il1b	Il1r2	5019193	5018746	10090.ENSMUSP00000028881	10090.ENSMUSP00000027243	0	0	0	0	0.162	0.742	0.9	0.735	0.993
Il1b	Il6	5019193	5018646	10090.ENSMUSP00000028881	10090.ENSMUSP00000026845	0	0	0	0	0.609	0	0	0.968	0.987
Serpine1	Plaur	5021889	5015517	10090.ENSMUSP00000039586	10090.ENSMUSP00000002284	0	0	0	0	0.224	0	0.9	0.846	0.987
Tnfaip6	Ptx3	5026369	5019348	10090.ENSMUSP00000069231	10090.ENSMUSP00000029421	0	0	0	0	0.166	0.197	0.9	0.81	0.985
Hspa1b	Hspa1a	5035960	5028636	10090.ENSMUSP00000133815	10090.ENSMUSP00000084586	0	0	0.449	0.988	0.711	0.493	0.9	0.835	0.984
Spp1	Il6	5032710	5018646	10090.ENSMUSP00000108367	10090.ENSMUSP00000026845	0	0	0	0	0.058	0	0.9	0.803	0.979
Cxcl1	Cxcl5	5019952	5019945	10090.ENSMUSP00000031327	10090.ENSMUSP00000031318	0	0	0	0.899	0.688	0.262	0.9	0.843	0.977
Cxcl1	Il6	5019952	5018646	10090.ENSMUSP00000031327	10090.ENSMUSP00000026845	0	0	0	0	0.624	0	0	0.935	0.974
Cd14	Tyrobp	5024683	5020344	10090.ENSMUSP00000056669	10090.ENSMUSP00000032800	0	0	0	0	0.677	0	0.9	0.26	0.974
Il6	Ccl2	5018646	5015259	10090.ENSMUSP00000026845	10090.ENSMUSP00000000193	0	0	0	0	0.418	0	0	0.956	0.973
Cxcl2	Cxcl1	5027242	5019952	10090.ENSMUSP00000074885	10090.ENSMUSP00000031327	0	0	0	0.953	0.7	0	0.9	0.917	0.97
Ccr1	Ccl3	5018664	5015351	10090.ENSMUSP00000026911	10090.ENSMUSP00000001008	0	0	0	0	0.192	0.146	0.6	0.899	0.968
Cxcl2	Ccr1	5027242	5018664	10090.ENSMUSP00000074885	10090.ENSMUSP00000026911	0	0	0	0	0.184	0.07	0.9	0.595	0.965
Cxcl5	Ccr1	5019945	5018664	10090.ENSMUSP00000031318	10090.ENSMUSP00000026911	0	0	0	0	0.098	0.07	0.9	0.621	0.963
Cxcl2	Cxcl5	5027242	5019945	10090.ENSMUSP00000074885	10090.ENSMUSP00000031318	0	0	0	0.9	0.485	0.262	0.9	0.838	0.962
Cxcl1	Ccr1	5019952	5018664	10090.ENSMUSP00000031327	10090.ENSMUSP00000026911	0	0	0	0	0.069	0.07	0.9	0.614	0.962
Cxcl2	Il6	5027242	5018646	10090.ENSMUSP00000074885	10090.ENSMUSP00000026845	0	0	0	0	0.655	0	0	0.876	0.955
Ptgs2	Il1b	5021066	5019193	10090.ENSMUSP00000035065	10090.ENSMUSP00000028881	0	0	0	0	0.313	0	0	0.937	0.955
Cxcl1	Ccl2	5019952	5015259	10090.ENSMUSP00000031327	10090.ENSMUSP00000000193	0	0	0	0	0.646	0.153	0	0.853	0.952
Cxcl2	Il1b	5027242	5019193	10090.ENSMUSP00000074885	10090.ENSMUSP00000028881	0	0	0	0	0.72	0	0	0.833	0.951
Cxcl2	Mmp8	5027242	5016628	10090.ENSMUSP00000074885	10090.ENSMUSP00000018765	0	0	0	0	0.171	0.058	0.9	0.444	0.95
Cxcl2	Ccl2	5027242	5015259	10090.ENSMUSP00000074885	10090.ENSMUSP00000000193	0	0	0	0	0.42	0.153	0	0.906	0.95
Adam8	Clec4d	5031512	5020210	10090.ENSMUSP00000101684	10090.ENSMUSP00000032240	0	0	0	0	0.439	0	0.9	0.186	0.95
Ptgs2	Il6	5021066	5018646	10090.ENSMUSP00000035065	10090.ENSMUSP00000026845	0	0	0	0	0.442	0	0	0.912	0.949
Il6	Igfbp3	5018646	5016991	10090.ENSMUSP00000026845	10090.ENSMUSP00000020702	0	0	0	0	0.061	0	0.9	0.485	0.947
Cxcl1	Arg1	5019952	5016835	10090.ENSMUSP00000031327	10090.ENSMUSP00000020161	0	0	0	0	0.062	0	0.9	0.475	0.946
Cxcl1	Mmp8	5019952	5016628	10090.ENSMUSP00000031327	10090.ENSMUSP00000018765	0	0	0	0	0.088	0.058	0.9	0.436	0.945
Arg1	Mmp8	5016835	5016628	10090.ENSMUSP00000020161	10090.ENSMUSP00000018765	0	0	0	0	0.062	0	0.9	0.447	0.943
Lgals3	Cd14	5033731	5024683	10090.ENSMUSP00000114350	10090.ENSMUSP00000056669	0	0	0	0	0.291	0	0.9	0.267	0.943
Tnfaip6	Cxcl1	5026369	5019952	10090.ENSMUSP00000069231	10090.ENSMUSP00000031327	0	0	0	0	0.062	0.117	0.9	0.393	0.942
Cxcl2	Arg1	5027242	5016835	10090.ENSMUSP00000074885	10090.ENSMUSP00000020161	0	0	0	0	0	0	0.9	0.435	0.941
Lgals3	Tyrobp	5033731	5020344	10090.ENSMUSP00000114350	10090.ENSMUSP00000032800	0	0	0	0	0.27	0	0.9	0.25	0.94
Cd53	Clec4d	5021222	5020210	10090.ENSMUSP00000035781	10090.ENSMUSP00000032240	0	0	0	0	0.401	0.048	0.9	0.06	0.939
Cxcl1	Ptx3	5019952	5019348	10090.ENSMUSP00000031327	10090.ENSMUSP00000029421	0	0	0	0	0.141	0	0.9	0.336	0.938
Cxcl2	Tnfaip6	5027242	5026369	10090.ENSMUSP00000074885	10090.ENSMUSP00000069231	0	0	0	0	0.062	0.117	0.9	0.323	0.936
Il1b	Ccl2	5019193	5015259	10090.ENSMUSP00000028881	10090.ENSMUSP00000000193	0	0	0	0	0.277	0	0	0.915	0.936
Spp1	Igfbp3	5032710	5016991	10090.ENSMUSP00000108367	10090.ENSMUSP00000020702	0	0	0	0	0.061	0	0.9	0.349	0.933
Adam8	Cd53	5031512	5021222	10090.ENSMUSP00000101684	10090.ENSMUSP00000035781	0	0	0	0	0.35	0.05	0.9	0	0.932
Cxcl2	Ptx3	5027242	5019348	10090.ENSMUSP00000074885	10090.ENSMUSP00000029421	0	0	0	0	0.095	0	0.9	0.238	0.925
Cxcl2	Ccl3	5027242	5015351	10090.ENSMUSP00000074885	10090.ENSMUSP00000001008	0	0	0	0	0.569	0	0	0.833	0.924
Ptx3	Mmp8	5019348	5016628	10090.ENSMUSP00000029421	10090.ENSMUSP00000018765	0	0	0	0	0.061	0	0.9	0.214	0.919
Il6	Ccl3	5018646	5015351	10090.ENSMUSP00000026845	10090.ENSMUSP00000001008	0	0	0	0	0.245	0	0	0.896	0.918
Clec4d	Plaur	5020210	5015517	10090.ENSMUSP00000032240	10090.ENSMUSP00000002284	0	0	0	0	0.203	0	0.9	0	0.916
Spp1	Tnc	5032710	5031733	10090.ENSMUSP00000108367	10090.ENSMUSP00000102995	0	0	0	0	0.073	0	0.9	0.128	0.912
Adam8	Plaur	5031512	5015517	10090.ENSMUSP00000101684	10090.ENSMUSP00000002284	0	0	0	0	0.127	0	0.9	0.075	0.912
Ccr1	Ccl2	5018664	5015259	10090.ENSMUSP00000026911	10090.ENSMUSP00000000193	0	0	0	0	0.127	0.147	0.6	0.736	0.911
Cd53	Plaur	5021222	5015517	10090.ENSMUSP00000035781	10090.ENSMUSP00000002284	0	0	0	0	0.103	0	0.9	0.078	0.91
Tnc	Igfbp3	5031733	5016991	10090.ENSMUSP00000102995	10090.ENSMUSP00000020702	0	0	0	0	0.123	0	0.9	0.054	0.909
Tnc	Il6	5031733	5018646	10090.ENSMUSP00000102995	10090.ENSMUSP00000026845	0	0	0	0	0.062	0	0.9	0.107	0.909
Cxcl1	Il1b	5019952	5019193	10090.ENSMUSP00000031327	10090.ENSMUSP00000028881	0	0	0	0	0.465	0	0	0.833	0.907
Ptx3	Arg1	5019348	5016835	10090.ENSMUSP00000029421	10090.ENSMUSP00000020161	0	0	0	0	0	0	0.9	0.11	0.907
Il1b	Ccl3	5019193	5015351	10090.ENSMUSP00000028881	10090.ENSMUSP00000001008	0	0	0	0	0.668	0	0	0.732	0.907
Tnfaip6	Mmp8	5026369	5016628	10090.ENSMUSP00000069231	10090.ENSMUSP00000018765	0	0	0	0	0.062	0.058	0.9	0.068	0.906
Cxcl5	Il1b	5019945	5019193	10090.ENSMUSP00000031318	10090.ENSMUSP00000028881	0	0	0	0	0.218	0	0	0.88	0.903
Plac8	Arg1	5019928	5016835	10090.ENSMUSP00000031264	10090.ENSMUSP00000020161	0	0	0	0	0	0	0.9	0	0.9
Cxcl5	Ccl2	5019945	5015259	10090.ENSMUSP00000031318	10090.ENSMUSP00000000193	0	0	0	0	0.39	0.262	0	0.792	0.898
Cxcl5	Il6	5019945	5018646	10090.ENSMUSP00000031318	10090.ENSMUSP00000026845	0	0	0	0	0.335	0	0	0.852	0.897
Cxcl1	Ccl3	5019952	5015351	10090.ENSMUSP00000031327	10090.ENSMUSP00000001008	0	0	0	0	0.34	0	0	0.832	0.884
Ptgs2	Ccl2	5021066	5015259	10090.ENSMUSP00000035065	10090.ENSMUSP00000000193	0	0	0	0	0.203	0	0	0.83	0.859
Il6	Myc	5018646	5017674	10090.ENSMUSP00000026845	10090.ENSMUSP00000022971	0	0	0	0	0	0	0	0.855	0.856
Chil3	Arg1	5024255	5016835	10090.ENSMUSP00000053923	10090.ENSMUSP00000020161	0	0	0	0	0.052	0	0	0.847	0.849
Ptgs2	Hmox1	5021066	5015845	10090.ENSMUSP00000035065	10090.ENSMUSP00000005548	0	0	0	0	0.085	0	0	0.84	0.848
Il6	Hmox1	5018646	5015845	10090.ENSMUSP00000026845	10090.ENSMUSP00000005548	0	0	0	0	0.061	0	0	0.845	0.848
Irs1	Il6	5025729	5018646	10090.ENSMUSP00000063795	10090.ENSMUSP00000026845	0	0	0	0	0	0	0	0.813	0.813
Hmox1	Ccl2	5015845	5015259	10090.ENSMUSP00000005548	10090.ENSMUSP00000000193	0	0	0	0	0.128	0	0	0.778	0.798
Ptgs2	Cxcl1	5021066	5019952	10090.ENSMUSP00000035065	10090.ENSMUSP00000031327	0	0	0	0	0.22	0	0	0.751	0.798
Serpine1	Il6	5021889	5018646	10090.ENSMUSP00000039586	10090.ENSMUSP00000026845	0	0	0	0	0.174	0	0	0.752	0.787
Cd53	Tyrobp	5021222	5020344	10090.ENSMUSP00000035781	10090.ENSMUSP00000032800	0	0	0	0	0.744	0	0	0.185	0.782
Serpine1	Ccl2	5021889	5015259	10090.ENSMUSP00000039586	10090.ENSMUSP00000000193	0	0	0	0	0.228	0	0	0.716	0.772
Chil3	Ccl2	5024255	5015259	10090.ENSMUSP00000053923	10090.ENSMUSP00000000193	0	0	0	0	0	0	0	0.766	0.766
Tnfaip6	Ptgs2	5026369	5021066	10090.ENSMUSP00000069231	10090.ENSMUSP00000035065	0	0	0	0	0.099	0	0	0.74	0.756
Cxcl5	Ccl3	5019945	5015351	10090.ENSMUSP00000031318	10090.ENSMUSP00000001008	0	0	0	0	0.166	0	0	0.715	0.752
Cd14	Il6	5024683	5018646	10090.ENSMUSP00000056669	10090.ENSMUSP00000026845	0	0	0	0	0.203	0	0	0.697	0.748
Selp	Cd24a	5034362	5024866	10090.ENSMUSP00000123924	10090.ENSMUSP00000057983	0	0	0	0	0	0.155	0	0.702	0.738
Cd14	Ccl2	5024683	5015259	10090.ENSMUSP00000056669	10090.ENSMUSP00000000193	0	0	0	0	0.414	0	0	0.57	0.737
Selp	Il1b	5034362	5019193	10090.ENSMUSP00000123924	10090.ENSMUSP00000028881	0	0	0	0	0.098	0	0	0.706	0.724
Ptgs2	Arg1	5021066	5016835	10090.ENSMUSP00000035065	10090.ENSMUSP00000020161	0	0	0	0	0	0	0	0.719	0.719
Spp1	Ccl2	5032710	5015259	10090.ENSMUSP00000108367	10090.ENSMUSP00000000193	0	0	0	0	0.186	0	0	0.667	0.718
Il6	Pgf	5018646	5015785	10090.ENSMUSP00000026845	10090.ENSMUSP00000004913	0	0	0	0	0	0	0	0.715	0.716
Il6	Arg1	5018646	5016835	10090.ENSMUSP00000026845	10090.ENSMUSP00000020161	0	0	0	0	0	0	0	0.715	0.715
Cxcl2	Ptgs2	5027242	5021066	10090.ENSMUSP00000074885	10090.ENSMUSP00000035065	0	0	0	0	0.266	0	0	0.626	0.714
Cd14	Il1b	5024683	5019193	10090.ENSMUSP00000056669	10090.ENSMUSP00000028881	0	0	0	0	0.417	0	0	0.528	0.713
Selp	Il6	5034362	5018646	10090.ENSMUSP00000123924	10090.ENSMUSP00000026845	0	0	0	0	0.121	0	0	0.686	0.712
Il1b	Hmox1	5019193	5015845	10090.ENSMUSP00000028881	10090.ENSMUSP00000005548	0	0	0	0	0.077	0	0	0.69	0.701
Cxcl1	Hmox1	5019952	5015845	10090.ENSMUSP00000031327	10090.ENSMUSP00000005548	0	0	0	0	0.105	0	0	0.679	0.7
Ptx3	Il6	5019348	5018646	10090.ENSMUSP00000029421	10090.ENSMUSP00000026845	0	0	0	0	0.22	0	0	0.63	0.699
Selp	Ccl2	5034362	5015259	10090.ENSMUSP00000123924	10090.ENSMUSP00000000193	0	0	0	0	0.1	0	0	0.68	0.699
Hspa1a	Il6	5028636	5018646	10090.ENSMUSP00000084586	10090.ENSMUSP00000026845	0	0	0	0	0	0	0	0.697	0.697
Prox1	Pdpn	5036119	5019642	10090.ENSMUSP00000135703	10090.ENSMUSP00000030317	0	0	0	0	0	0	0	0.695	0.695
Arg1	Ccl2	5016835	5015259	10090.ENSMUSP00000020161	10090.ENSMUSP00000000193	0	0	0	0	0	0	0	0.692	0.692
Sphk1	Il6	5035552	5018646	10090.ENSMUSP00000131010	10090.ENSMUSP00000026845	0	0	0	0	0.091	0	0	0.669	0.686
Chil3	Il6	5024255	5018646	10090.ENSMUSP00000053923	10090.ENSMUSP00000026845	0	0	0	0	0.062	0	0	0.678	0.685
Psat1	Tubb6	5018284	5015418	10090.ENSMUSP00000025542	10090.ENSMUSP00000001513	0	0	0	0	0.119	0.65	0	0	0.678
Myc	Ccl2	5017674	5015259	10090.ENSMUSP00000022971	10090.ENSMUSP00000000193	0	0	0	0	0.117	0	0	0.636	0.666
Lgals3	Ccl2	5033731	5015259	10090.ENSMUSP00000114350	10090.ENSMUSP00000000193	0	0	0	0	0.22	0	0	0.583	0.661
Hspa1b	Hmox1	5035960	5015845	10090.ENSMUSP00000133815	10090.ENSMUSP00000005548	0	0	0	0	0.062	0	0	0.649	0.657
Selp	Hmox1	5034362	5015845	10090.ENSMUSP00000123924	10090.ENSMUSP00000005548	0	0	0	0	0.061	0	0	0.645	0.653
Spp1	Mmp8	5032710	5016628	10090.ENSMUSP00000108367	10090.ENSMUSP00000018765	0	0	0	0	0.068	0.127	0	0.605	0.651
Sphk1	Ptgs2	5035552	5021066	10090.ENSMUSP00000131010	10090.ENSMUSP00000035065	0	0	0	0	0.061	0	0	0.642	0.65
Hspa1b	Il6	5035960	5018646	10090.ENSMUSP00000133815	10090.ENSMUSP00000026845	0	0	0	0	0	0	0	0.642	0.642
Il6	Mmp8	5018646	5016628	10090.ENSMUSP00000026845	10090.ENSMUSP00000018765	0	0	0	0	0.087	0	0	0.621	0.639
Spp1	Ccr1	5032710	5018664	10090.ENSMUSP00000108367	10090.ENSMUSP00000026911	0	0	0	0	0.081	0	0	0.621	0.637
Hspa1b	Ccl2	5035960	5015259	10090.ENSMUSP00000133815	10090.ENSMUSP00000000193	0	0	0	0	0	0	0	0.637	0.637
Lgals3	Spp1	5033731	5032710	10090.ENSMUSP00000114350	10090.ENSMUSP00000108367	0	0	0	0	0.279	0	0	0.514	0.634
Cd14	Ccl3	5024683	5015351	10090.ENSMUSP00000056669	10090.ENSMUSP00000001008	0	0	0	0	0.414	0	0	0.395	0.63
Selp	Ptx3	5034362	5019348	10090.ENSMUSP00000123924	10090.ENSMUSP00000029421	0	0	0	0	0.079	0.05	0	0.61	0.629
Ptx3	Il1b	5019348	5019193	10090.ENSMUSP00000029421	10090.ENSMUSP00000028881	0	0	0	0	0.086	0	0	0.604	0.622
Serpine1	Ptgs2	5021889	5021066	10090.ENSMUSP00000039586	10090.ENSMUSP00000035065	0	0	0	0	0.227	0	0	0.526	0.618
Selp	Serpine1	5034362	5021889	10090.ENSMUSP00000123924	10090.ENSMUSP00000039586	0	0	0	0	0.06	0.048	0	0.604	0.615
Il1b	Mmp8	5019193	5016628	10090.ENSMUSP00000028881	10090.ENSMUSP00000018765	0	0	0	0	0.217	0.077	0	0.509	0.615
Chil3	Il1b	5024255	5019193	10090.ENSMUSP00000053923	10090.ENSMUSP00000028881	0	0	0	0	0.173	0	0	0.552	0.613
Il1b	Arg1	5019193	5016835	10090.ENSMUSP00000028881	10090.ENSMUSP00000020161	0	0	0	0	0.061	0	0	0.603	0.611
Ccr1	Il6	5018664	5018646	10090.ENSMUSP00000026911	10090.ENSMUSP00000026845	0	0	0	0	0.094	0	0	0.588	0.61
Lgals3	Il6	5033731	5018646	10090.ENSMUSP00000114350	10090.ENSMUSP00000026845	0	0	0	0	0.081	0	0	0.589	0.606
Cxcl2	Cd14	5027242	5024683	10090.ENSMUSP00000074885	10090.ENSMUSP00000056669	0	0	0	0	0.408	0	0	0.355	0.602
Il6	Hbegf	5018646	5018229	10090.ENSMUSP00000026845	10090.ENSMUSP00000025363	0	0	0	0	0.109	0	0	0.57	0.601
Ptgs2	Myc	5021066	5017674	10090.ENSMUSP00000035065	10090.ENSMUSP00000022971	0	0	0	0	0	0	0	0.591	0.591
Spp1	Il1b	5032710	5019193	10090.ENSMUSP00000108367	10090.ENSMUSP00000028881	0	0	0	0	0.062	0	0	0.575	0.585
Cd14	Cxcl1	5024683	5019952	10090.ENSMUSP00000056669	10090.ENSMUSP00000031327	0	0	0	0	0.388	0	0	0.348	0.584
Ptx3	Ccl2	5019348	5015259	10090.ENSMUSP00000029421	10090.ENSMUSP00000000193	0	0	0	0	0.231	0	0	0.48	0.583
Ptgs2	Cxcl5	5021066	5019945	10090.ENSMUSP00000035065	10090.ENSMUSP00000031318	0	0	0	0	0.145	0	0	0.532	0.583
Il6	Gdf15	5018646	5015689	10090.ENSMUSP00000026845	10090.ENSMUSP00000003808	0	0	0	0	0	0	0	0.58	0.58
Sphk1	Myc	5035552	5017674	10090.ENSMUSP00000131010	10090.ENSMUSP00000022971	0	0	0	0	0.06	0	0	0.57	0.579
Mmp8	Ccl2	5016628	5015259	10090.ENSMUSP00000018765	10090.ENSMUSP00000000193	0	0	0	0	0.068	0.156	0	0.506	0.577
Serpine1	Hmox1	5021889	5015845	10090.ENSMUSP00000039586	10090.ENSMUSP00000005548	0	0	0	0	0.124	0	0	0.533	0.574
Tnfaip6	Il6	5026369	5018646	10090.ENSMUSP00000069231	10090.ENSMUSP00000026845	0	0	0	0	0.145	0	0	0.523	0.574
Serpine1	Cxcl1	5021889	5019952	10090.ENSMUSP00000039586	10090.ENSMUSP00000031327	0	0	0	0	0.134	0	0	0.522	0.568
Ptgs2	Ccl3	5021066	5015351	10090.ENSMUSP00000035065	10090.ENSMUSP00000001008	0	0	0	0	0.132	0	0	0.522	0.567
Serpine1	Il1b	5021889	5019193	10090.ENSMUSP00000039586	10090.ENSMUSP00000028881	0	0	0	0	0.112	0	0	0.53	0.565
Hspa1b	Myc	5035960	5017674	10090.ENSMUSP00000133815	10090.ENSMUSP00000022971	0	0	0	0	0.05	0.049	0	0.556	0.563
Il1b	Ccr1	5019193	5018664	10090.ENSMUSP00000028881	10090.ENSMUSP00000026911	0	0	0	0	0.199	0.058	0	0.459	0.556
Serpine1	Igfbp3	5021889	5016991	10090.ENSMUSP00000039586	10090.ENSMUSP00000020702	0	0	0	0	0.083	0	0	0.535	0.555
Spp1	Ptgs2	5032710	5021066	10090.ENSMUSP00000108367	10090.ENSMUSP00000035065	0	0	0	0	0.104	0	0	0.521	0.552
S100a8	Serpine1	5025800	5021889	10090.ENSMUSP00000064385	10090.ENSMUSP00000039586	0	0	0	0	0.061	0	0	0.54	0.55
Cd24a	Myc	5024866	5017674	10090.ENSMUSP00000057983	10090.ENSMUSP00000022971	0	0	0	0	0.058	0	0	0.542	0.55
Selp	Cxcl1	5034362	5019952	10090.ENSMUSP00000123924	10090.ENSMUSP00000031327	0	0	0	0	0.089	0.049	0	0.523	0.55
Spp1	Serpine1	5032710	5021889	10090.ENSMUSP00000108367	10090.ENSMUSP00000039586	0	0	0	0	0.088	0	0	0.527	0.55
Il1r2	Il6	5018746	5018646	10090.ENSMUSP00000027243	10090.ENSMUSP00000026845	0	0	0	0	0.09	0	0	0.523	0.547
Ch25h	Ccl2	5023586	5015259	10090.ENSMUSP00000049683	10090.ENSMUSP00000000193	0	0	0	0	0.406	0	0	0.26	0.541
Serpine1	Mmp8	5021889	5016628	10090.ENSMUSP00000039586	10090.ENSMUSP00000018765	0	0	0	0	0.062	0.127	0	0.475	0.532
Pgf	Ccl2	5015785	5015259	10090.ENSMUSP00000004913	10090.ENSMUSP00000000193	0	0	0	0	0.052	0	0	0.525	0.53
Cd14	Clec4d	5024683	5020210	10090.ENSMUSP00000056669	10090.ENSMUSP00000032240	0	0	0	0	0.449	0	0	0.18	0.528
Tnfaip6	Ccl2	5026369	5015259	10090.ENSMUSP00000069231	10090.ENSMUSP00000000193	0	0	0	0	0.099	0.13	0	0.446	0.527
S100a8	Il1b	5025800	5019193	10090.ENSMUSP00000064385	10090.ENSMUSP00000028881	0	0	0	0	0.241	0	0	0.401	0.526
Slc2a1	Myc	5019665	5017674	10090.ENSMUSP00000030398	10090.ENSMUSP00000022971	0	0	0	0	0.096	0	0	0.496	0.525
Irs1	Ccl2	5025729	5015259	10090.ENSMUSP00000063795	10090.ENSMUSP00000000193	0	0	0	0	0	0	0	0.524	0.524
Irs1	Igfbp3	5025729	5016991	10090.ENSMUSP00000063795	10090.ENSMUSP00000020702	0	0	0	0	0.089	0	0	0.499	0.524
Cxcl5	Mmp8	5019945	5016628	10090.ENSMUSP00000031318	10090.ENSMUSP00000018765	0	0	0	0	0.062	0.058	0	0.504	0.523
Cd24a	Il6	5024866	5018646	10090.ENSMUSP00000057983	10090.ENSMUSP00000026845	0	0	0	0	0	0	0	0.522	0.522
Il6	Plaur	5018646	5015517	10090.ENSMUSP00000026845	10090.ENSMUSP00000002284	0	0	0	0	0.151	0	0	0.457	0.519
Tnfaip6	Il1b	5026369	5019193	10090.ENSMUSP00000069231	10090.ENSMUSP00000028881	0	0	0	0	0.086	0	0	0.493	0.517
Spp1	Cxcl1	5032710	5019952	10090.ENSMUSP00000108367	10090.ENSMUSP00000031327	0	0	0	0	0.097	0	0	0.487	0.517
Ptgs2	Mmp8	5021066	5016628	10090.ENSMUSP00000035065	10090.ENSMUSP00000018765	0	0	0	0	0.061	0	0	0.502	0.512
Serpine1	Ptx3	5021889	5019348	10090.ENSMUSP00000039586	10090.ENSMUSP00000029421	0	0	0	0	0.133	0	0	0.458	0.51
Serpine1	Procr	5021889	5019276	10090.ENSMUSP00000039586	10090.ENSMUSP00000029140	0	0	0	0	0.132	0	0	0.457	0.509
Lgals3	Chil3	5033731	5024255	10090.ENSMUSP00000114350	10090.ENSMUSP00000053923	0	0	0	0	0.095	0.046	0	0.477	0.509
S100a9	Chil3	5033455	5024255	10090.ENSMUSP00000112843	10090.ENSMUSP00000053923	0	0	0	0	0.411	0	0	0.2	0.508
Hspa1a	Hmox1	5028636	5015845	10090.ENSMUSP00000084586	10090.ENSMUSP00000005548	0	0	0	0	0.062	0	0	0.496	0.508
Tyrobp	Clec4d	5020344	5020210	10090.ENSMUSP00000032800	10090.ENSMUSP00000032240	0	0	0	0	0.419	0.046	0	0.18	0.506
Ccl3	Ccl2	5015351	5015259	10090.ENSMUSP00000001008	10090.ENSMUSP00000000193	0	0	0	0.858	0.431	0	0	0.932	0.506
Selp	Cxcl2	5034362	5027242	10090.ENSMUSP00000123924	10090.ENSMUSP00000074885	0	0	0	0	0.096	0.049	0	0.472	0.506
S100a8	Mmp8	5025800	5016628	10090.ENSMUSP00000064385	10090.ENSMUSP00000018765	0	0	0	0	0.418	0.05	0	0.177	0.505
Plaur	Ccl2	5015517	5015259	10090.ENSMUSP00000002284	10090.ENSMUSP00000000193	0	0	0	0	0.24	0	0	0.373	0.504
Il1r2	Ccr1	5018746	5018664	10090.ENSMUSP00000027243	10090.ENSMUSP00000026911	0	0	0	0	0.151	0	0	0.436	0.501
Clec4d	Ccl3	5020210	5015351	10090.ENSMUSP00000032240	10090.ENSMUSP00000001008	0	0	0	0	0.416	0	0	0.18	0.5
Cxcl2	Clec4d	5027242	5020210	10090.ENSMUSP00000074885	10090.ENSMUSP00000032240	0	0	0	0	0.368	0.049	0	0.236	0.5
Clec4d	Il1b	5020210	5019193	10090.ENSMUSP00000032240	10090.ENSMUSP00000028881	0	0	0	0	0.417	0	0	0.177	0.5
Irs1	Myc	5025729	5017674	10090.ENSMUSP00000063795	10090.ENSMUSP00000022971	0	0	0	0	0	0.046	0	0.495	0.497
Irs1	Serpine1	5025729	5021889	10090.ENSMUSP00000063795	10090.ENSMUSP00000039586	0	0	0	0	0.06	0	0	0.485	0.496
Cxcl2	Hmox1	5027242	5015845	10090.ENSMUSP00000074885	10090.ENSMUSP00000005548	0	0	0	0	0.106	0	0	0.454	0.491
Tyrobp	Il6	5020344	5018646	10090.ENSMUSP00000032800	10090.ENSMUSP00000026845	0	0	0	0	0.062	0	0	0.479	0.49
S100a8	Chil3	5025800	5024255	10090.ENSMUSP00000064385	10090.ENSMUSP00000053923	0	0	0	0	0.417	0	0	0.16	0.489
Serpine1	Pgf	5021889	5015785	10090.ENSMUSP00000039586	10090.ENSMUSP00000004913	0	0	0	0	0.068	0	0	0.472	0.487
Cxcl1	Ier3	5019952	5015673	10090.ENSMUSP00000031327	10090.ENSMUSP00000003635	0	0	0	0	0.304	0	0	0.293	0.487
Procr	Il6	5019276	5018646	10090.ENSMUSP00000029140	10090.ENSMUSP00000026845	0	0	0	0	0.184	0	0	0.397	0.486
Spp1	Ccl3	5032710	5015351	10090.ENSMUSP00000108367	10090.ENSMUSP00000001008	0	0	0	0	0.173	0	0	0.403	0.485
S100a8	Hmox1	5025800	5015845	10090.ENSMUSP00000064385	10090.ENSMUSP00000005548	0	0	0	0	0	0	0	0.484	0.484
Serpine1	Myc	5021889	5017674	10090.ENSMUSP00000039586	10090.ENSMUSP00000022971	0	0	0	0	0.124	0	0	0.435	0.484
S100a8	Il6	5025800	5018646	10090.ENSMUSP00000064385	10090.ENSMUSP00000026845	0	0	0	0	0	0	0	0.483	0.483
Cxcl2	Il1r2	5027242	5018746	10090.ENSMUSP00000074885	10090.ENSMUSP00000027243	0	0	0	0	0.124	0	0	0.434	0.482
Selp	Procr	5034362	5019276	10090.ENSMUSP00000123924	10090.ENSMUSP00000029140	0	0	0	0	0.081	0	0	0.459	0.481
Adam8	Ccl2	5031512	5015259	10090.ENSMUSP00000101684	10090.ENSMUSP00000000193	0	0	0	0	0.368	0	0	0.208	0.478
Ptgs2	Ptx3	5021066	5019348	10090.ENSMUSP00000035065	10090.ENSMUSP00000029421	0	0	0	0	0.15	0	0	0.411	0.478
Lgals3	Arg1	5033731	5016835	10090.ENSMUSP00000114350	10090.ENSMUSP00000020161	0	0	0	0	0	0	0	0.477	0.477
Arg1	Ccl3	5016835	5015351	10090.ENSMUSP00000020161	10090.ENSMUSP00000001008	0	0	0	0	0	0	0	0.475	0.475
Il1r2	Ccl2	5018746	5015259	10090.ENSMUSP00000027243	10090.ENSMUSP00000000193	0	0	0	0	0.113	0	0	0.431	0.474
Ptgs2	Hbegf	5021066	5018229	10090.ENSMUSP00000035065	10090.ENSMUSP00000025363	0	0	0	0	0.132	0	0	0.418	0.473
Cxcl1	Il1r2	5019952	5018746	10090.ENSMUSP00000031327	10090.ENSMUSP00000027243	0	0	0	0	0.09	0	0	0.439	0.467
Irs1	Il1b	5025729	5019193	10090.ENSMUSP00000063795	10090.ENSMUSP00000028881	0	0	0	0	0	0	0	0.467	0.467
Cxcl2	Ier3	5027242	5015673	10090.ENSMUSP00000074885	10090.ENSMUSP00000003635	0	0	0	0	0.237	0	0	0.329	0.466
Chil3	Ccl3	5024255	5015351	10090.ENSMUSP00000053923	10090.ENSMUSP00000001008	0	0	0	0	0.114	0	0	0.421	0.465
Lgals3	Il1b	5033731	5019193	10090.ENSMUSP00000114350	10090.ENSMUSP00000028881	0	0	0	0	0.099	0	0	0.427	0.461
Lgals3	Adam8	5033731	5031512	10090.ENSMUSP00000114350	10090.ENSMUSP00000101684	0	0	0	0	0.382	0	0	0.165	0.461
Arg1	Hmox1	5016835	5015845	10090.ENSMUSP00000020161	10090.ENSMUSP00000005548	0	0	0	0	0	0	0	0.456	0.456
Mmp8	Ccl3	5016628	5015351	10090.ENSMUSP00000018765	10090.ENSMUSP00000001008	0	0	0	0	0.131	0	0	0.399	0.455
Irs1	Slc2a1	5025729	5019665	10090.ENSMUSP00000063795	10090.ENSMUSP00000030398	0	0	0	0	0	0	0	0.454	0.454
Ptx3	Igfbp3	5019348	5016991	10090.ENSMUSP00000029421	10090.ENSMUSP00000020702	0	0	0	0	0.077	0	0	0.427	0.449
Serpine1	Cxcl5	5021889	5019945	10090.ENSMUSP00000039586	10090.ENSMUSP00000031318	0	0	0	0	0.079	0	0	0.425	0.448
Selp	Cxcl5	5034362	5019945	10090.ENSMUSP00000123924	10090.ENSMUSP00000031318	0	0	0	0	0.076	0.049	0	0.422	0.448
Ptgs2	Plaur	5021066	5015517	10090.ENSMUSP00000035065	10090.ENSMUSP00000002284	0	0	0	0	0.193	0	0	0.342	0.446
Ch25h	Il1b	5023586	5019193	10090.ENSMUSP00000049683	10090.ENSMUSP00000028881	0	0	0	0	0.191	0	0	0.338	0.442
Spp1	Cxcl5	5032710	5019945	10090.ENSMUSP00000108367	10090.ENSMUSP00000031318	0	0	0	0	0.104	0	0	0.403	0.442
Hbegf	Igfbp3	5018229	5016991	10090.ENSMUSP00000025363	10090.ENSMUSP00000020702	0	0	0	0	0.056	0	0	0.433	0.441
Spp1	Myc	5032710	5017674	10090.ENSMUSP00000108367	10090.ENSMUSP00000022971	0	0	0	0	0	0	0	0.44	0.44
Hspa1b	Ptgs2	5035960	5021066	10090.ENSMUSP00000133815	10090.ENSMUSP00000035065	0	0	0	0	0.057	0.05	0	0.422	0.436
Serpine1	Ier3	5021889	5015673	10090.ENSMUSP00000039586	10090.ENSMUSP00000003635	0	0	0	0	0.29	0	0	0.238	0.436
Il1r2	Ccl3	5018746	5015351	10090.ENSMUSP00000027243	10090.ENSMUSP00000001008	0	0	0	0	0.1	0	0	0.4	0.436
Adam8	Ccl3	5031512	5015351	10090.ENSMUSP00000101684	10090.ENSMUSP00000001008	0	0	0	0	0.368	0	0	0.144	0.435
Tyrobp	Ccl3	5020344	5015351	10090.ENSMUSP00000032800	10090.ENSMUSP00000001008	0	0	0	0	0.239	0	0	0.286	0.433
Clec4d	Ccl2	5020210	5015259	10090.ENSMUSP00000032240	10090.ENSMUSP00000000193	0	0	0	0	0.338	0	0	0.178	0.432
Myc	Hmox1	5017674	5015845	10090.ENSMUSP00000022971	10090.ENSMUSP00000005548	0	0	0	0	0.087	0	0	0.402	0.431
Lgals3	Ccl3	5033731	5015351	10090.ENSMUSP00000114350	10090.ENSMUSP00000001008	0	0	0	0	0.195	0	0	0.321	0.43
Spp1	Cxcl2	5032710	5027242	10090.ENSMUSP00000108367	10090.ENSMUSP00000074885	0	0	0	0	0.096	0	0	0.396	0.43
Il6	Ier3	5018646	5015673	10090.ENSMUSP00000026845	10090.ENSMUSP00000003635	0	0	0	0	0.129	0	0	0.371	0.429
Tnfaip6	Cxcl5	5026369	5019945	10090.ENSMUSP00000069231	10090.ENSMUSP00000031318	0	0	0	0	0.062	0.157	0	0.334	0.428
Ccr1	Mmp8	5018664	5016628	10090.ENSMUSP00000026911	10090.ENSMUSP00000018765	0	0	0	0	0.22	0.057	0	0.283	0.427
Selp	Ccl3	5034362	5015351	10090.ENSMUSP00000123924	10090.ENSMUSP00000001008	0	0	0	0	0.087	0	0	0.398	0.427
Ptgs2	Pgf	5021066	5015785	10090.ENSMUSP00000035065	10090.ENSMUSP00000004913	0	0	0	0	0	0	0	0.425	0.425
Cxcl2	Serpine1	5027242	5021889	10090.ENSMUSP00000074885	10090.ENSMUSP00000039586	0	0	0	0	0.125	0	0	0.37	0.425
Lgals3	Clec4d	5033731	5020210	10090.ENSMUSP00000114350	10090.ENSMUSP00000032240	0	0	0	0	0.38	0.05	0	0.099	0.423
Mmp8	Plaur	5016628	5015517	10090.ENSMUSP00000018765	10090.ENSMUSP00000002284	0	0	0	0	0.099	0.199	0	0.263	0.422
Lgals3	Gdf15	5033731	5015689	10090.ENSMUSP00000114350	10090.ENSMUSP00000003808	0	0	0	0	0.088	0	0	0.391	0.421
Cxcl5	Il1r2	5019945	5018746	10090.ENSMUSP00000031318	10090.ENSMUSP00000027243	0	0	0	0	0.08	0	0	0.397	0.421
Serpine1	Hbegf	5021889	5018229	10090.ENSMUSP00000039586	10090.ENSMUSP00000025363	0	0	0	0	0.132	0	0	0.359	0.42
Selp	Ptgs2	5034362	5021066	10090.ENSMUSP00000123924	10090.ENSMUSP00000035065	0	0	0	0	0.06	0.048	0	0.404	0.42
S100a9	Il1b	5033455	5019193	10090.ENSMUSP00000112843	10090.ENSMUSP00000028881	0	0	0	0	0.237	0	0	0.271	0.42
Hspa1b	Il1b	5035960	5019193	10090.ENSMUSP00000133815	10090.ENSMUSP00000028881	0	0	0	0	0	0	0	0.418	0.418
Spp1	Plaur	5032710	5015517	10090.ENSMUSP00000108367	10090.ENSMUSP00000002284	0	0	0	0	0.103	0	0	0.378	0.418
Cd53	Cytip	5021222	5019007	10090.ENSMUSP00000035781	10090.ENSMUSP00000028175	0	0	0	0	0.407	0.056	0	0	0.416
Il1b	Plaur	5019193	5015517	10090.ENSMUSP00000028881	10090.ENSMUSP00000002284	0	0	0	0	0.263	0	0	0.24	0.416
Nppb	Il6	5030944	5018646	10090.ENSMUSP00000099521	10090.ENSMUSP00000026845	0	0	0	0	0	0	0	0.415	0.415
Clec4d	Slfn4	5020210	5015264	10090.ENSMUSP00000032240	10090.ENSMUSP00000000208	0	0	0	0	0.216	0	0	0.281	0.412
Cd14	Arg1	5024683	5016835	10090.ENSMUSP00000056669	10090.ENSMUSP00000020161	0	0	0	0	0.062	0	0	0.396	0.409
Adam8	Tyrobp	5031512	5020344	10090.ENSMUSP00000101684	10090.ENSMUSP00000032800	0	0	0	0	0.357	0	0	0.112	0.405
Cd14	Cxcl5	5024683	5019945	10090.ENSMUSP00000056669	10090.ENSMUSP00000031318	0	0	0	0	0.165	0	0	0.315	0.404
Ier3	Ccl2	5015673	5015259	10090.ENSMUSP00000003635	10090.ENSMUSP00000000193	0	0	0	0	0.169	0	0	0.311	0.403
Spp1	Hmox1	5032710	5015845	10090.ENSMUSP00000108367	10090.ENSMUSP00000005548	0	0	0	0	0.113	0	0	0.355	0.403
Irs1	Hmox1	5025729	5015845	10090.ENSMUSP00000063795	10090.ENSMUSP00000005548	0	0	0	0	0	0	0	0.403	0.403
Tyrobp	Ccl2	5020344	5015259	10090.ENSMUSP00000032800	10090.ENSMUSP00000000193	0	0	0	0	0.126	0	0	0.342	0.4
